# Supplementary material
Source: PubMed Central journal article supplement (PMC4771517)
Supplement: NIHMS759404-supplement-Supporting_Info.pdf [file NIHMS759404-supplement-Supporting_Info.pdf]

# Supporting Information for

## “Comprehensive Characterization of Glycosylation and Hydroxylation of Basement Membrane Collagen IV by High-Resolution Mass Spectrometry”

Trayambak Basak<sup>a, b</sup>, Lorenzo Vega-Montoto<sup>a, b, #</sup>, Lisa J. Zimmerman<sup>c</sup>, David L. Tabb<sup>c, d</sup>, Billy G. Hudson<sup>a, b, c</sup> and Roberto M. Vanacore<sup>a, b, \*</sup>

<sup>a</sup>Department of Medicine, Division of Nephrology and Hypertension, <sup>b</sup>Center for Matrix Biology, <sup>c</sup>Department of Biochemistry, <sup>d</sup>Department of Biomedical Informatics, Vanderbilt University Medical Center, Nashville, TN 37232

Running Title: Mass spectrometry analysis of collagen IV

To whom correspondence should be addressed: Department of Medicine, Division of Nephrology and Hypertension, Vanderbilt University Medical Center, 1161 21st Avenue South, B-3113 Medical Center North, Nashville, TN 37232, USA, Tel.: (615) 322-8323; Fax: (615) 343-7156; E-mail: [roberto.vanacore@vanderbilt.edu](mailto:roberto.vanacore@vanderbilt.edu)

<sup>#</sup>Current address: LVM is at Idaho National Laboratory, Idaho Falls, ID.

<sup>\*</sup>Corresponding author

---

### Table of Content

| Supporting information | Page No. |
|------------------------|----------|
| Supporting table S1    | 1        |
| Supporting table S2    | 2        |
| Supporting figure S1   | 3        |
| Supporting figure S2   | 4-40     |
| Supporting figure S3   | 41-88    |
| Supporting figure S4   | 89       |
| Supporting figure S5   | 90       |
| Cited References       | 91       |

**Supporting table S1:** Detail of samples analyzed with multiple nzymes and different fragmentation method using LTQ-orbitrap Velos and Q-Exactive

| Samples                                   | LTQ- orbitrap Velos                     | Q-Exactive                                            |
|-------------------------------------------|-----------------------------------------|-------------------------------------------------------|
| 1. Purified 7S from PHFR9 cells           | Trypsin (CID, ETD)                      | XX                                                    |
| 2. EHS mouse collagen IV (BD Biosciences) | a. Trypsin<br>b. GluC<br><br>(CID, ETD) | a. Trypsin<br>b. GluC<br>c. LysC+Trypsin<br><br>(HCD) |

**Supplementary table S2** Comparative analysis of O-glycosylation sites detected in mouse and human col4a1

| O-glycosylation sites | Mouse Collagen IV                              | Human Collagen IV                              |
|-----------------------|------------------------------------------------|------------------------------------------------|
| K <sup>45</sup>       | Glucosyl-galactosyl - hydroxylysine            | Not detected                                   |
| K <sup>48</sup>       | Glucosyl-galactosyl - hydroxylysine            | Not detected                                   |
| K <sup>78</sup>       | Galactosyl / glucosyl-galactosyl-hydroxylysine | Galactosyl / glucosyl-galactosyl-hydroxylysine |
| K <sup>90</sup>       | Galactosyl / glucosyl-galactosyl-hydroxylysine | Galactosyl / glucosyl-galactosyl-hydroxylysine |
| K <sup>155</sup>      | No glycosylation detected                      | Galactosyl - hydroxylysine                     |
| K <sup>217</sup>      | Glucosyl-galactosyl - hydroxylysine            | Not detected                                   |
| K <sup>228</sup>      | Glucosyl-galactosyl - hydroxylysine            | Not detected                                   |
| K <sup>231</sup>      | Glucosyl-galactosyl - hydroxylysine            | Not detected                                   |
| K <sup>295</sup>      | Glucosyl-galactosyl - hydroxylysine            | Glucosyl-galactosyl - hydroxylysine            |
| K <sup>298</sup>      | Not conserved                                  | Glucosyl-galactosyl - hydroxylysine            |
| K <sup>322</sup>      | Glucosyl-galactosyl - hydroxylysine            | Glucosyl-galactosyl - hydroxylysine            |
| K <sup>343</sup>      | No glycosylation detected                      | Glucosyl-galactosyl - hydroxylysine            |
| K <sup>361</sup>      | Glucosyl-galactosyl - hydroxylysine            | Galactosyl / glucosyl-galactosyl-hydroxylysine |
| K <sup>393</sup>      | Glucosyl-galactosyl - hydroxylysine            | Not detected                                   |
| K <sup>460</sup>      | Glucosyl-galactosyl - hydroxylysine            | Galactosyl - hydroxylysine                     |
| K <sup>463</sup>      | Galactosyl / glucosyl-galactosyl-hydroxylysine | Glucosyl-galactosyl - hydroxylysine            |
| K <sup>497</sup>      | Glucosyl-galactosyl - hydroxylysine            | Glucosyl-galactosyl - hydroxylysine            |
| K <sup>527</sup>      | Glucosyl-galactosyl - hydroxylysine            | Glucosyl-galactosyl - hydroxylysine            |
| K <sup>573</sup>      | Galactosyl / glucosyl-galactosyl-hydroxylysine | Glucosyl-galactosyl - hydroxylysine            |
| K <sup>582</sup>      | Glucosyl-galactosyl - hydroxylysine            | Hydroxylysine                                  |
| K <sup>617</sup>      | Glucosyl-galactosyl - hydroxylysine            | Glucosyl-galactosyl - hydroxylysine            |
| K <sup>635</sup>      | Glucosyl-galactosyl - hydroxylysine            | Glucosyl-galactosyl - hydroxylysine            |
| K <sup>681</sup>      | Glucosyl-galactosyl - hydroxylysine            | Glucosyl-galactosyl - hydroxylysine            |
| K <sup>698</sup>      | Hydroxylysine                                  | Glucosyl-galactosyl - hydroxylysine            |
| K <sup>731</sup>      | No glycosylation detected                      | Glucosyl-galactosyl - hydroxylysine            |
| K <sup>742</sup>      | Hydroxylysine                                  | Glucosyl-galactosyl - hydroxylysine            |
| K <sup>757</sup>      | Glucosyl-galactosyl - hydroxylysine            | Glucosyl-galactosyl - hydroxylysine            |
| K <sup>825</sup>      | Glucosyl-galactosyl - hydroxylysine            | Glucosyl-galactosyl - hydroxylysine            |
| K <sup>828</sup>      | Glucosyl-galactosyl - hydroxylysine            | Hydroxylysine                                  |
| K <sup>1025</sup>     | Galactosyl - hydroxylysine                     | Glucosyl-galactosyl - hydroxylysine            |
| K <sup>1043</sup>     | Galactosyl / glucosyl-galactosyl-hydroxylysine | Hydroxylysine                                  |
| K <sup>1046</sup>     | Galactosyl / glucosyl-galactosyl-hydroxylysine | Galactosyl - hydroxylysine                     |
| K <sup>1049</sup>     | Hydroxylysine                                  | Galactosyl / glucosyl-galactosyl-hydroxylysine |
| K <sup>1066</sup>     | Not detected                                   | Galactosyl / glucosyl-galactosyl-hydroxylysine |
| K <sup>1081</sup>     | Galactosyl / glucosyl-galactosyl-hydroxylysine | Hydroxylysine                                  |
| K <sup>1117</sup>     | Galactosyl - hydroxylysine                     | Galactosyl - hydroxylysine                     |
| K <sup>1120</sup>     | Glucosyl-galactosyl - hydroxylysine            | Hydroxylysine                                  |
| K <sup>1132</sup>     | Galactosyl - hydroxylysine                     | Galactosyl / glucosyl-galactosyl-hydroxylysine |
| K <sup>1150</sup>     | No glycosylation detected                      | Galactosyl - hydroxylysine                     |
| K <sup>1165</sup>     | Galactosyl - hydroxylysine                     | Hydroxylysine                                  |
| K <sup>1185</sup>     | Galactosyl - hydroxylysine                     | Glucosyl-galactosyl - hydroxylysine            |
| K <sup>1188</sup>     | Hydroxylysine                                  | Galactosyl / glucosyl-galactosyl-hydroxylysine |
| K <sup>1206</sup>     | Glucosyl-galactosyl - hydroxylysine            | Hydroxylysine                                  |
| K <sup>1268</sup>     | Galactosyl - hydroxylysine                     | Hydroxylysine                                  |
| K <sup>1283</sup>     | Galactosyl - hydroxylysine                     | Hydroxylysine                                  |
| K <sup>1304</sup>     | Galactosyl - hydroxylysine                     | Galactosyl / glucosyl-galactosyl-hydroxylysine |
| K <sup>1319</sup>     | Not detected                                   | Galactosyl - hydroxylysine                     |
| K <sup>1328</sup>     | Not detected                                   | Glucosyl-galactosyl - hydroxylysine            |
| K <sup>1340</sup>     | Not detected                                   | Galactosyl / glucosyl-galactosyl-hydroxylysine |
| K <sup>1371</sup>     | Galactosyl - hydroxylysine                     | No glycosylation detected                      |
| K <sup>1380</sup>     | Glucosyl-galactosyl - hydroxylysine            | No glycosylation detected                      |
| K <sup>1407</sup>     | Glucosyl-galactosyl - hydroxylysine            | Not detected                                   |

A.

```

1-130  MGPRLSVWLL LLFAALLLHE ERSRAAAKGD CGS8GCGKCD CHGVKQKGE RGLPGLQVVI GPFMQGPEG PHGPPGQKGD AGEPLGLPCTK GTRGPPGAAG YPGNPLGLPI PGQDGPFPFP GIPGCNGTKG
131-260 ERGFLGPPGL PFGSGNPGPP GLPGMKGDPP EILGHVPGTL LKGERGFPGI PQMFGSPGLE GLQGVVPPPG FTGPPGPPGP PGGPGEKQGM GSSFQGPKGD KGEQGVSGPP GVPGQAQVKE KGFAPFTGKE
261-390 GKQKGPFPFG VPGYGEKGE P GKQPRGKPG KDGEKGERGS PGI PGDSGYF GLPGRQPGQ EKGEAGLPGP PGTVIGTMPL GEKGDGRVPG APGLRGEPPG KGFPGTGGP GPPGFTPGQ AGAPGFPGER
391-520 GEKGDQGFPG VSLPGPSGRD GAPPPGPPG PPGQPGHTNG IVECPGPPG DOGPFPTPG PGLTGEVQK GOKGESCLAC DTEGLRPPPG PGGPPEIGE PGQPGAKGR GLPGRDGLG LPPGQGSPL
521-650 IGQPKAKGEP GEIFFDMRLK GDKDPGFPG PQMPGRAGT PGRDGHPLG GPKGSPGSIG LKGERGPPGG VGFPGSRGDI GPPGPPGVGP IGPVGEKQA GPPGPGSPG LPPGKGEAGK VVPLPGPPGA
651-780 AGLPGSPGFP GPQGDGRGFP TPGRPPIPGE KGAVGQPGIG PFLGPKPGV DGLPGEIGRP GSPGRPFENG LPPNPGPQGG KGEPIGLPG LKQGPLGLPI PGTPEKESI GPPGVPEGG LTPGPPGLQGI
781-910 RGDPPGPPGQ GPAGPPGVPG IGPFGAMGP GGQPPGSSG PPGIKGKGF PGPGLDMGP PKDGRSQGL PGLTQSGLE GLPQQGTG VGFPGSKGE MGVMTGGP GSPGAGTGG LPPGKGDHGL
911-1040 PGSSGPRGDP GFKGDKGDVG LPPMPGSMH VDMGSMKQK GDQGEKQIG PTDGKSRGD PGTGGVPGKD GQAGHPGQPG PKGDPGLSGT PPSPLPGEK GSVGMGLPG SPGEKGVPI PPSQVPPGSP
1041-1170 GEKGAKEGK QSLPGIIGI GRPDKGDQD LAGFPSPGE KGEKGSAGT GMPGSPFRG SPGNIGHPS PGLPGEKGDK GLPGLDGVPG VKGEAGLPGT PGTTPGAGK GERPGDGGP SAGEKGEQV
1171-1300 PGRGFPFGFP SKGDKGRSGE VGF PGLAGS P GIPGVKGEQG FMGPPGQGG PGLPPTGHP VEGPKGDRGP QGQPLGHPH GPMGPPGFP INGPKDKGN QGMPGAPVP GPKGDPGFG MPGIGSPGI
1301-1430 TGSKGDMGLP GVPFGQKGG LPLGLQVKGD QDQGVPPGK GLQPPGPPG PVDVKEGEP LPPGPPGGL KGLQGPGEK GQQGVTGSPG LPPGPPVPG DGAPGQKET GPPGPPGPP FPPGPPGDL
1431-1560 PGMSPGPPPT SVDHGFLVTR HSQTTDDPLC PPGTKILYHG YSLLYVQGN RAHQDLGTA GSCLRKFTM PFLFCNINNV CNFASRNDYS YMLSTPEPM MSMAPISGDN IRPPIRCAV CEAPAMVMV
-----
1561-1669 HSQTIQIPQC PMSSSLWIG YSEVMHTSAG AEGSQALAS PSCLEEFPS APPIECHGRG TCNYYANAYS EWLATIERSE MEKKTPTSTL KAGELRTHVS RCQVCHRRT
-----

```

B.

```

1-130  MGPRLSVWLL LLFAALLLHE ERSRAAAKGD CGS8GCGKCD CHGVKQKGE RGLPGLQVVI GPFMQGPEG PHGPPGQKGD AGEPLGLPCTK GTRGPPGAAG YPGNPLGLPI PGQDGPFPFP GIPGCNGTKG
131-260 ERGFLGPPGL PFGSGNPGPP GLPGMKGDPP EILGHVPGTL LKGERGFPGI PQMFGSPGLE GLQGVVPPPG FTGPPGPPGP PGGPGEKQGM GSSFQGPKGD KGEQGVSGPP GVPGQAQVKE KGFAPFTGKE
261-390 GKQKGPFPFG VPGYGEKGE P GKQPRGKPG KDGEKGERGS PGI PGDSGYF GLPGRQPGQ EKGEAGLPGP PGTVIGTMPL GEKGDGRVPG APGLRGEPPG KGFPGTGGP GPPGFTPGQ AGAPGFPGER
-----
391-520 GEKGDQGFPG VSLPGPSGRD GAPPPGPPG PPGQPGHTNG IVECPGPPG DOGPFPTPG PGLTGEVQK GOKGESCLAC DTEGLRPPPG PGGPPEIGE PGQPGAKGR GLPGRDGLG LPPGQGSPL
-----
521-650 IGQPKAKGEP GEIFFDMRLK GDKDPGFPG PQMPGRAGT PGRDGHPLG GPKGSPGSIG LKGERGPPGG VGFPGSRGDI GPPGPPGVGP IGPVGEKQA GPPGPGSPG LPPGKGEAGK VVPLPGPPGA
-----
651-780 AGLPGSPGFP GPQGDGRGFP TPGRPPIPGE KGAVGQPGIG PFLGPKPGV DGLPGEIGRP GSPGRPFENG LPPNPGPQGG KGEPIGLPG LKQGPLGLPI PGTPEKESI GPPGVPEGG LTPGPPGLQGI
-----
781-910 RGDPPGPPGQ GPAGPPGVPG IGPFGAMGP GGQPPGSSG PPGIKGKGF PGPGLDMGP PKDGRSQGL PGLTQSGLE GLPQQGTG VGFPGSKGE MGVMTGGP GSPGAGTGG LPPGKGDHGL
-----
911-1040 PGSSGPRGDP GFKGDKGDVG LPPMPGSMH VDMGSMKQK GDQGEKQIG PTDGKSRGD PGTGGVPGKD GQAGHPGQPG PKGDPGLSGT PPSPLPGEK GSVGMGLPG SPGEKGVPI PPSQVPPGSP
-----
1041-1170 GEKGAKEGK QSLPGIIGI GRPDKGDQD LAGFPSPGE KGEKGSAGT GMPGSPFRG SPGNIGHPS PGLPGEKGDK GLPGLDGVPG VKGEAGLPGT PGTTPGAGK GERPGDGGP SAGEKGEQV
-----
1171-1300 PGRGFPFGFP SKGDKGRSGE VGF PGLAGS P GIPGVKGEQG FMGPPGQGG PGLPPTGHP VEGPKGDRGP QGQPLGHPH GPMGPPGFP INGPKDKGN QGMPGAPVP GPKGDPGFG MPGIGSPGI
-----
1301-1430 TGSKGDMGLP GVPFGQKGG LPLGLQVKGD QDQGVPPGK GLQPPGPPG PVDVKEGEP LPPGPPGGL KGLQGPGEK GQQGVTGSPG LPPGPPVPG DGAPGQKET GPPGPPGPP FPPGPPGDL
-----
1431-1560 PGMSPGPPPT SVDHGFLVTR HSQTTDDPLC PPGTKILYHG YSLLYVQGN RAHQDLGTA GSCLRKFTM PFLFCNINNV CNFASRNDYS YMLSTPEPM MSMAPISGDN IRPPIRCAV CEAPAMVMV
-----
1561-1669 HSQTIQIPQC PMSSSLWIG YSEVMHTSAG AEGSQALAS PSCLEEFPS APPIECHGRG TCNYYANAYS EWLATIERSE MEKKTPTSTL KAGELRTHVS RCQVCHRRT
-----

```

**Supporting figure S1:** A representative diagram showing improved sequence coverage of mouse col4a1 by optimizing the number of allowed posttranslational modifications and miscleavages in the database search using MyriMatch. A. A MS data file from a trypsin digested EHS collagen sample was searched with a standard database search using carbamidomethylation as static modification, oxidation of methionine as dynamic modification and allowing for only 2 dynamic modifications per peptide. B. The same MS data file searched with MyriMatch, but increasing the number of miscleavages (up to 4) and dynamic modifications (up to 10) using the hydroxylation and O-linked glycosylation motifs described in Table 1.

**Supporting figure S2:** Peptide spectrum matches (PSMs) of 35 O-glycosylation, 1 hydroxyproline site at Xaa position of Gly-HyP-Gln motif and 7 3-hydroxyproline sites in mouse col4a1 chain. PSMs were annotated using pLABEL<sup>1</sup> or IDPicker utility software Ion Matcher<sup>2</sup>.

m/z = 780.3089 charge = +4

PSM showing the identification of Glucosylgalactosyl-HyK<sup>45,48</sup>

Mouse col4a1 chain

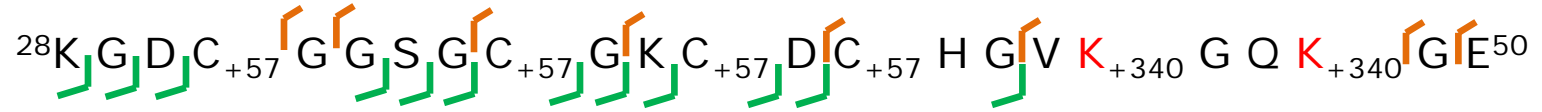

Q Exactive, HCD Fragmentation

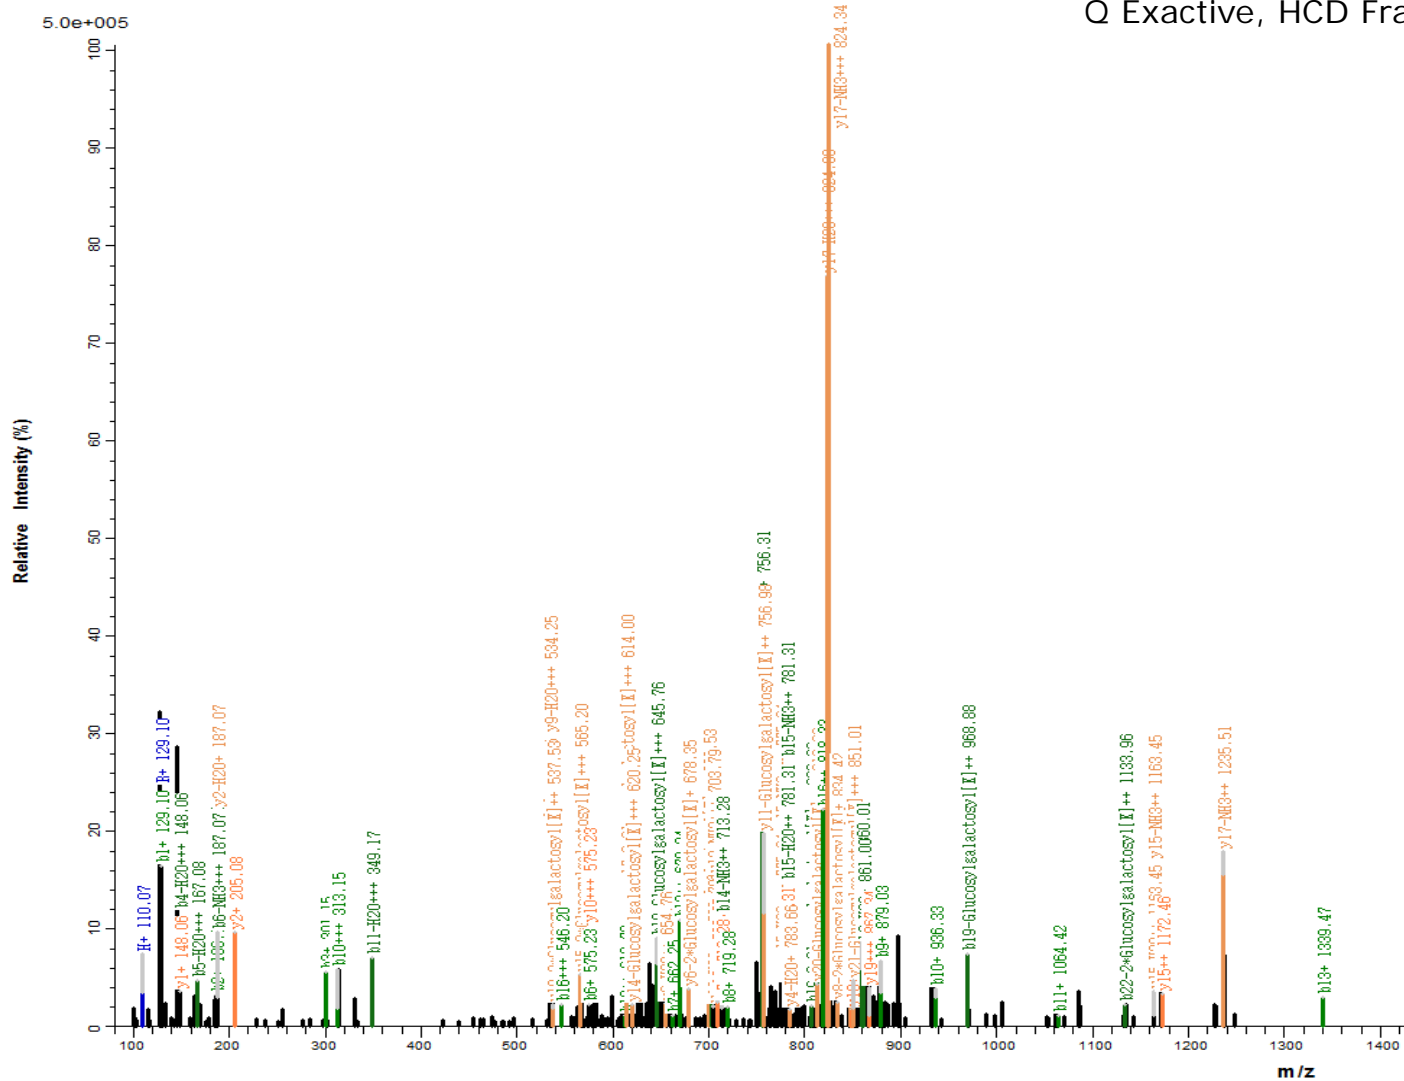

m/z= 1191.5593 charge= +4

PSM showing the identification of Glucosylgalactosyl-HyK<sup>78,90</sup>

Mouse col4a1 chain

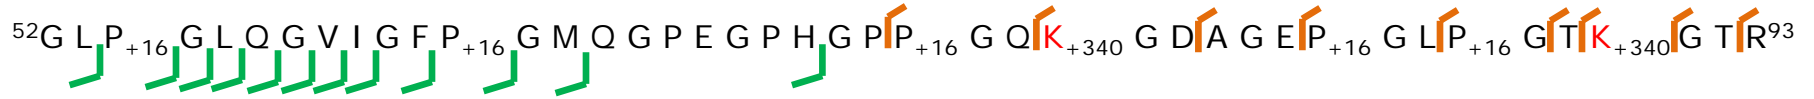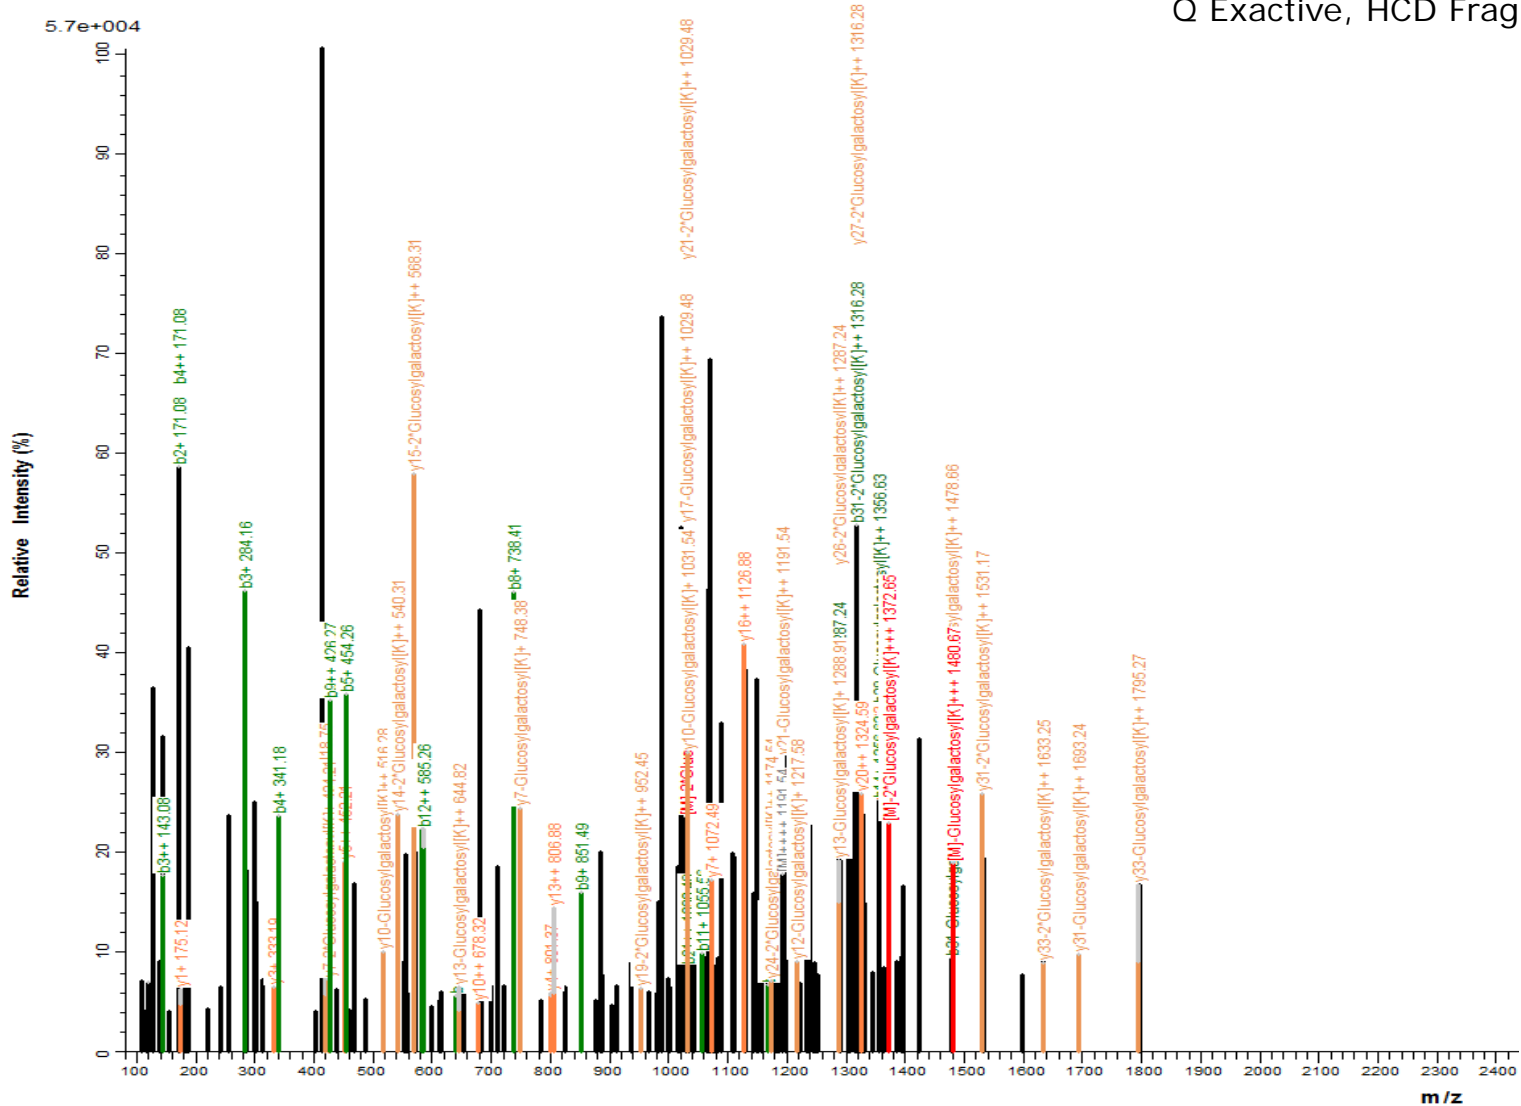

m/z = 915.5043,  
charge = +5

PSM showing the identification of Galactosyl-HyK<sup>217,228,231</sup>

Mouse col4a1 chain

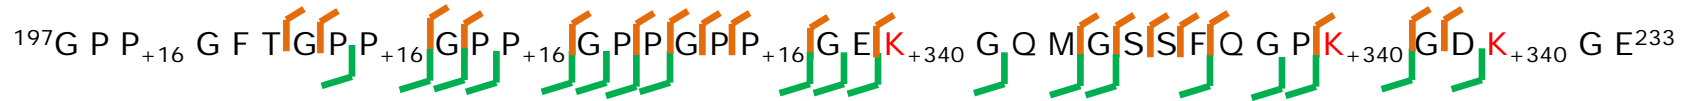

Orbitrap-Velos, ETD Fragmentation

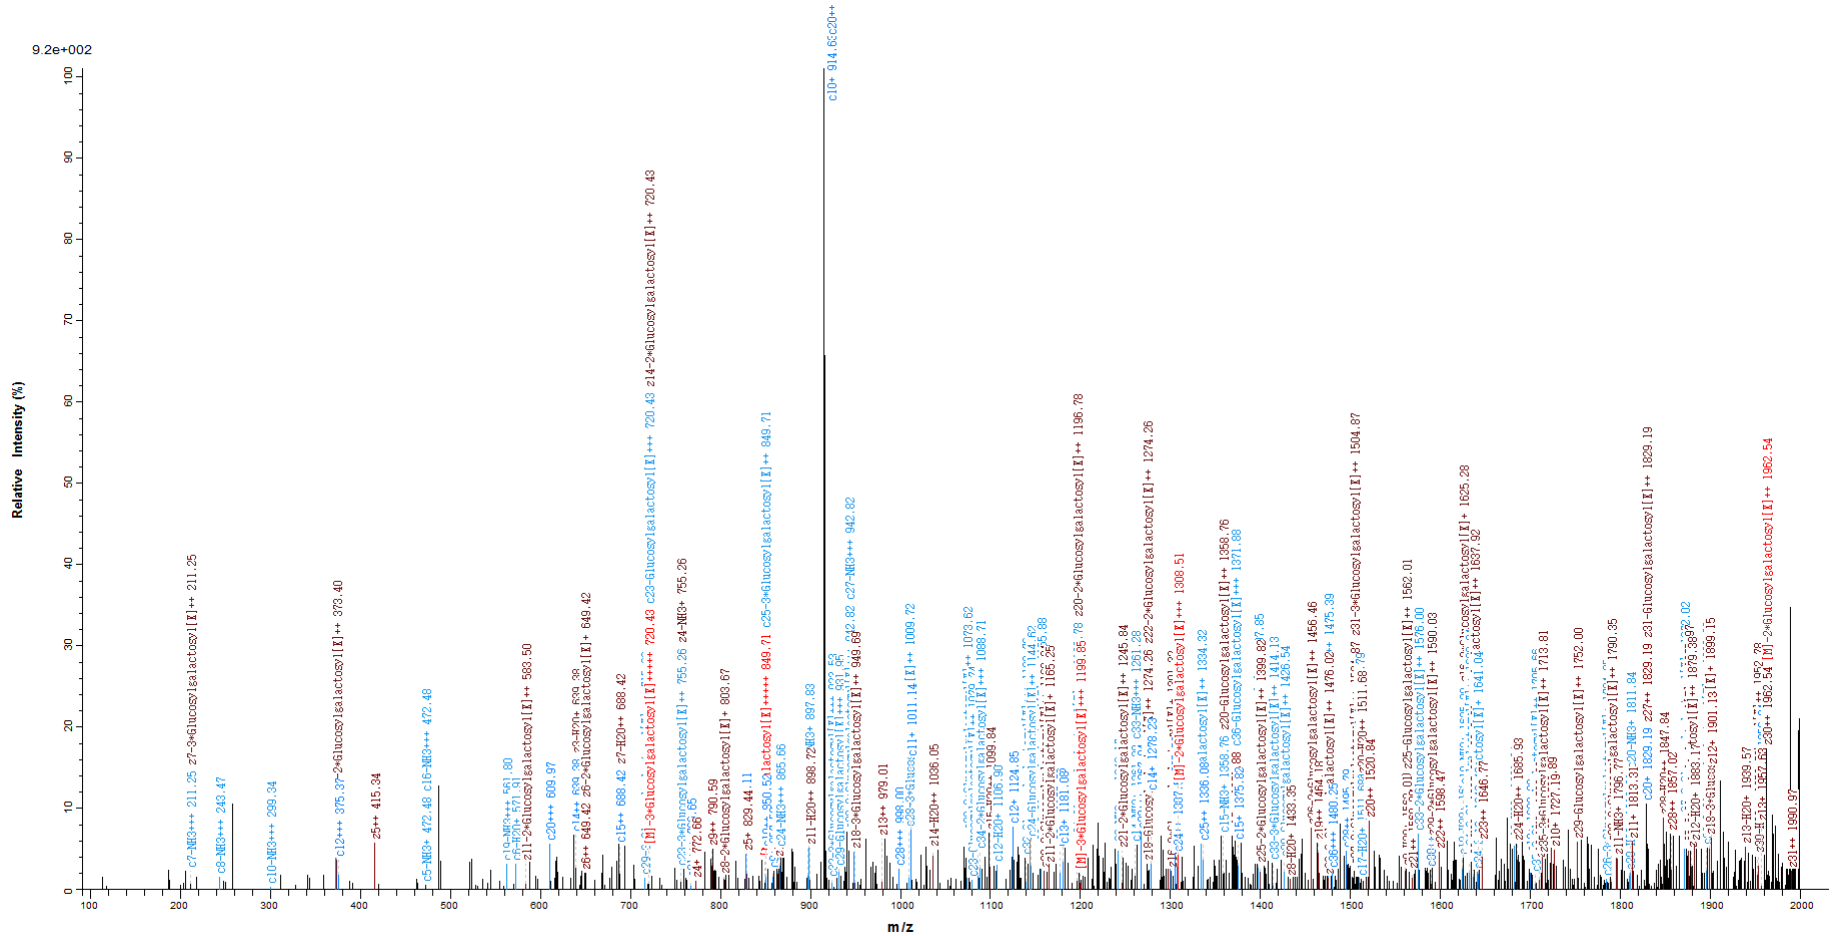



m/z = 690.5574,  
charge = +4

PSM showing the identification of Glucosylgalactosyl-HyK<sup>95</sup>

Mouse col4a1 chain

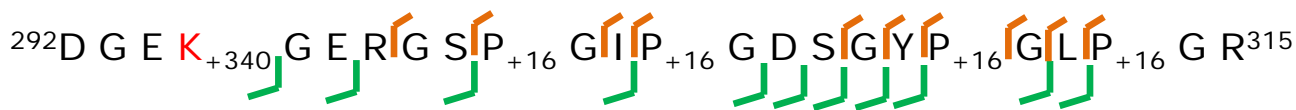

Q Exactive, HCD Fragmentation

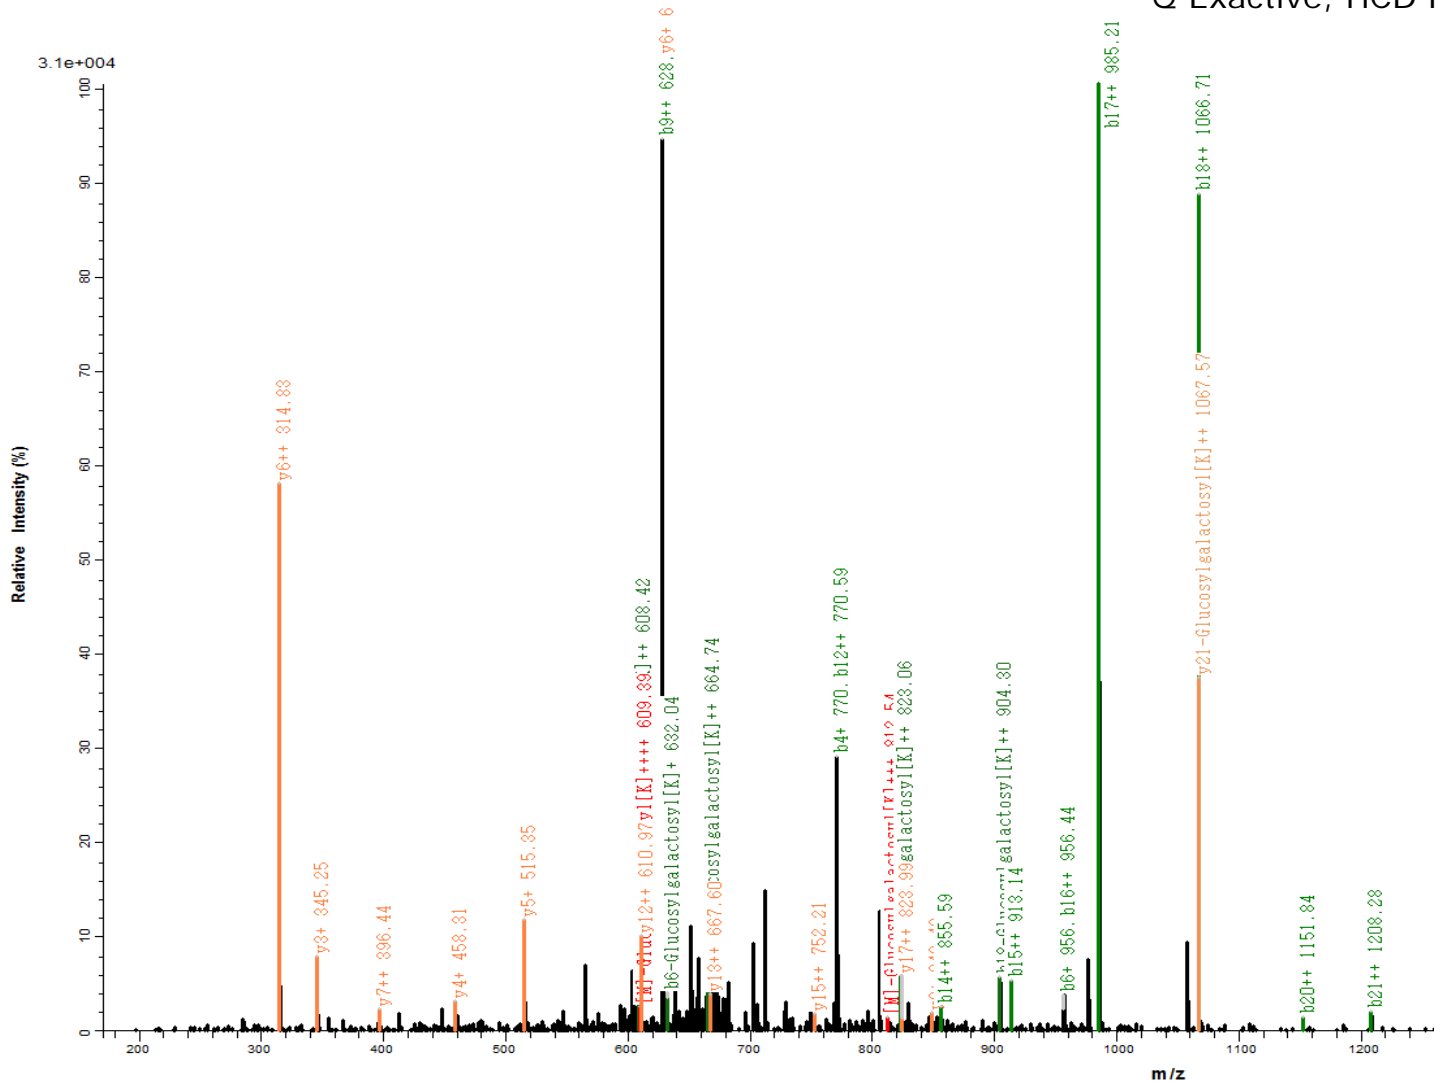

m/z= 1157.5483 charge= +4

PSM showing the identification of Glucosylgalactosyl-HyK<sup>322,343</sup>

Mouse col4a1 chain

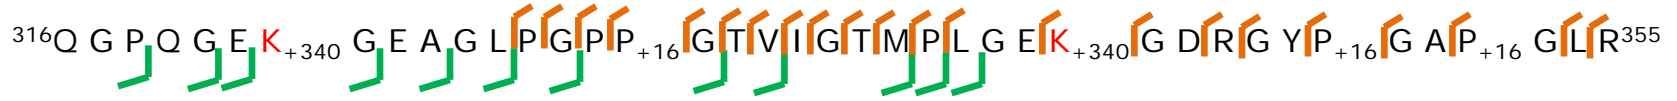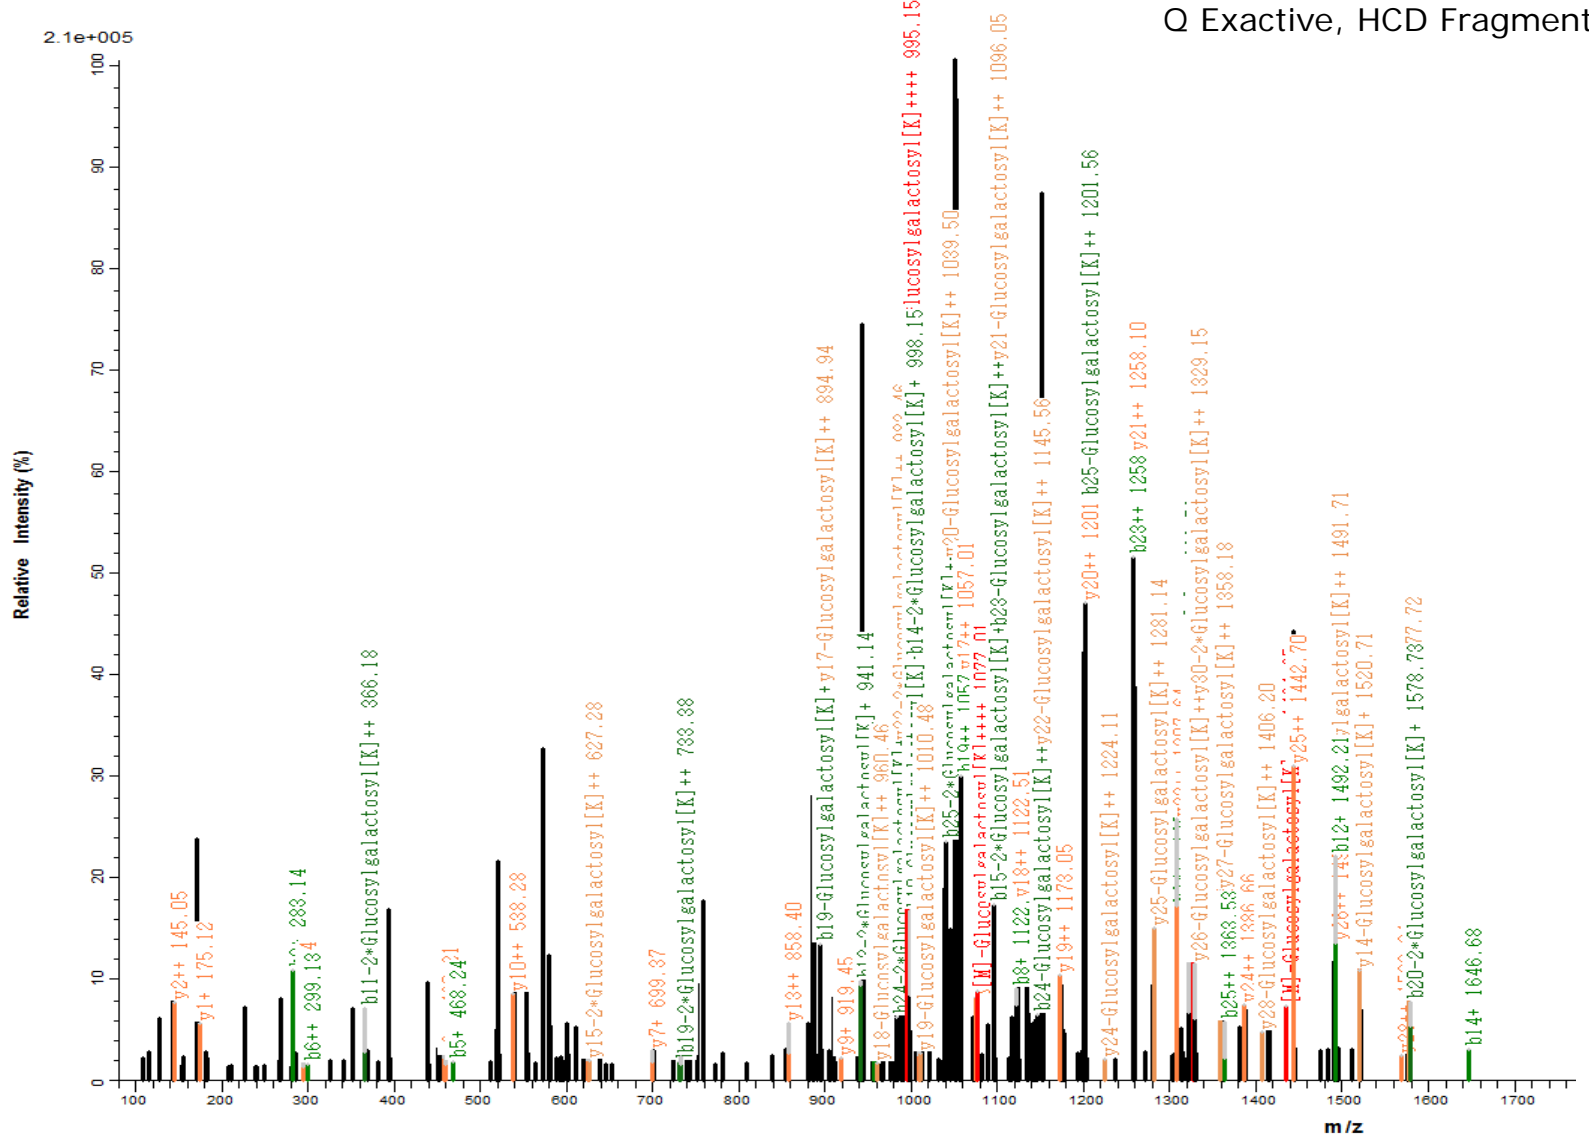



m/z= 733.34 charge= +3

PSM showing the identification of Glucosylgalactosyl-HyK<sup>393</sup>

Mouse col4a1 chain

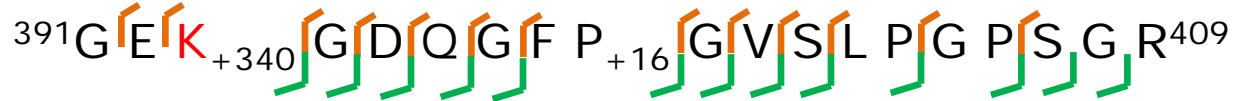

Orbitrap-Velos, ETD Fragmentation

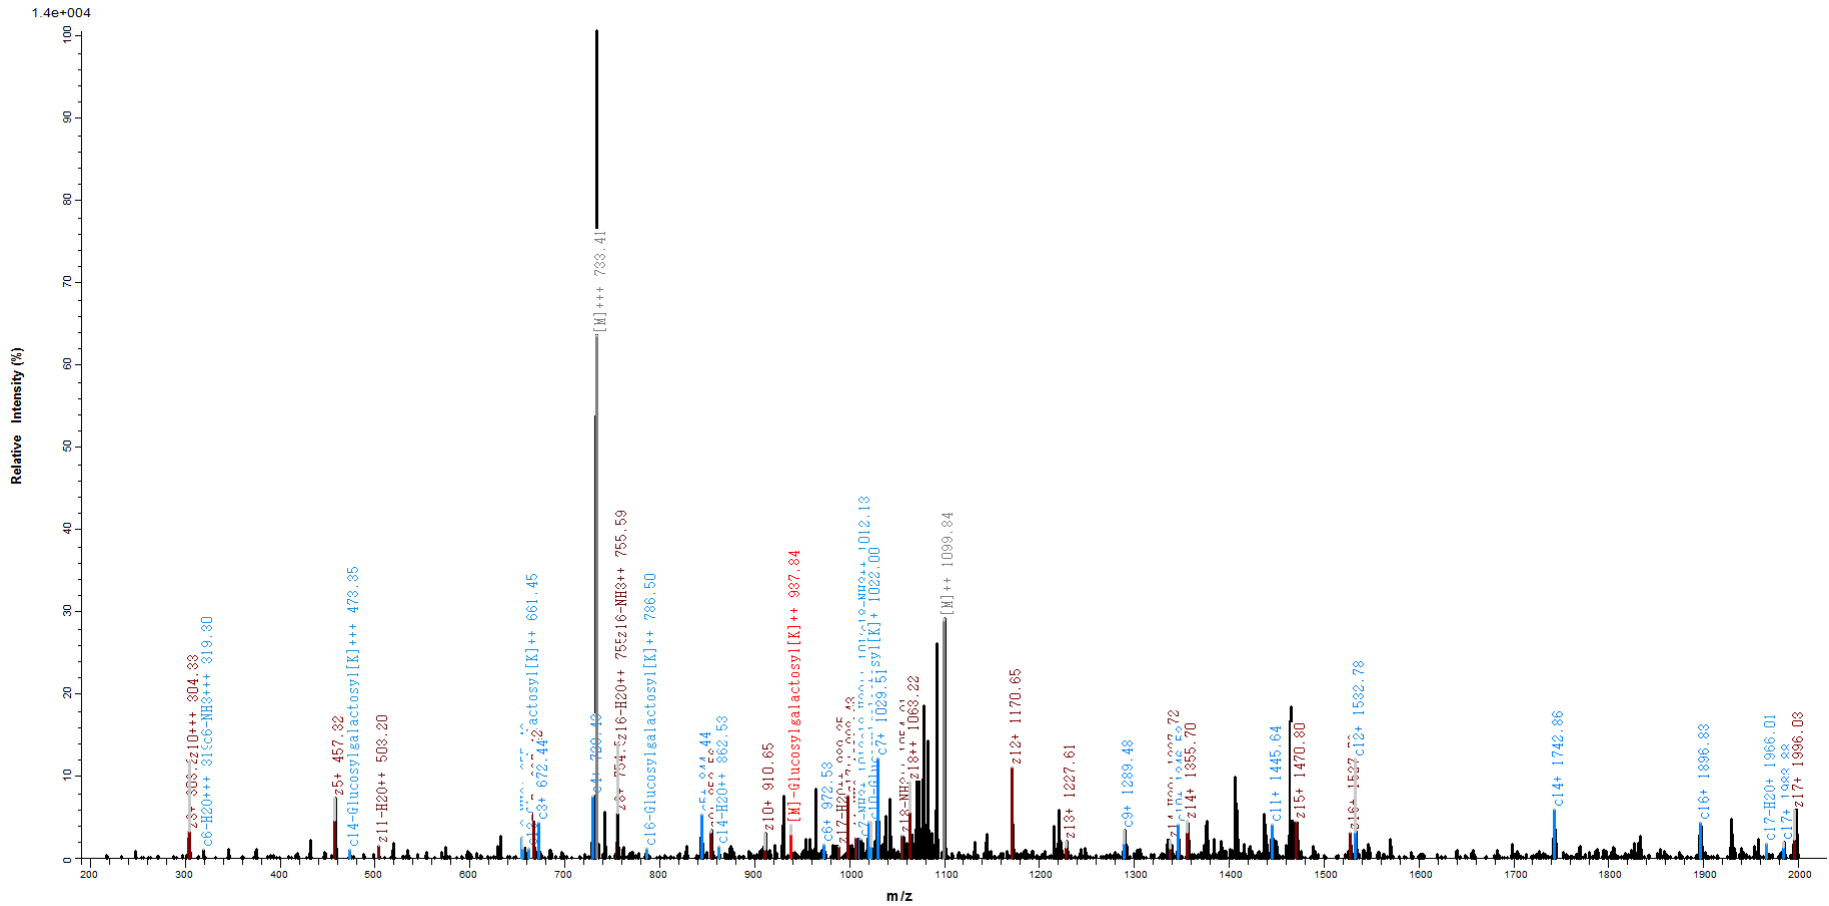



m/z= 823.7868 charge= +5

PSM showing the identification of Glucosylgalactosyl-HyK<sup>481</sup>

Mouse col4a1 chain

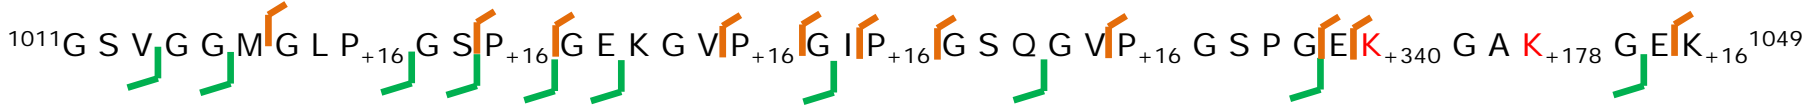

Q Exactive, HCD Fragmentation

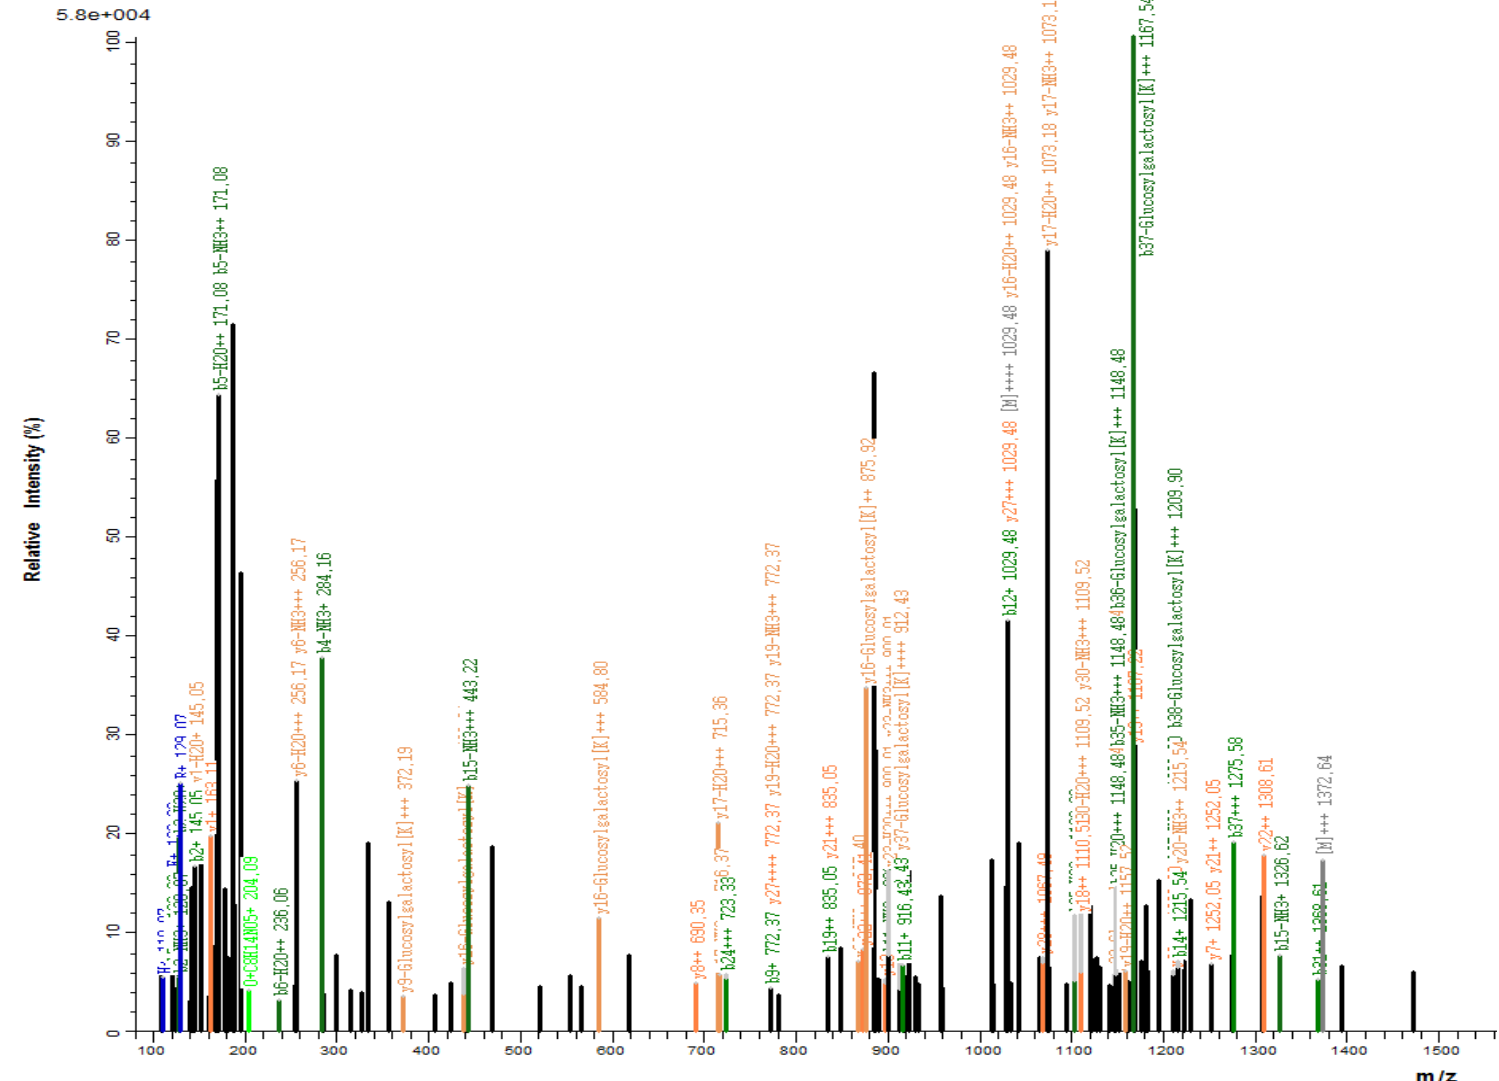

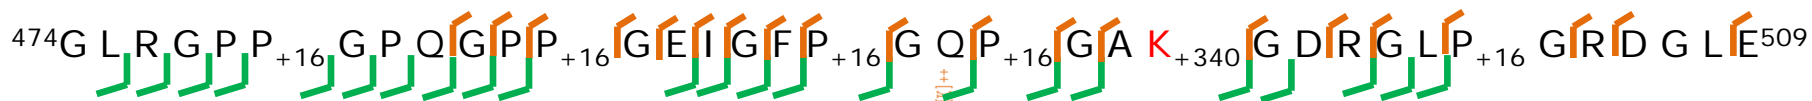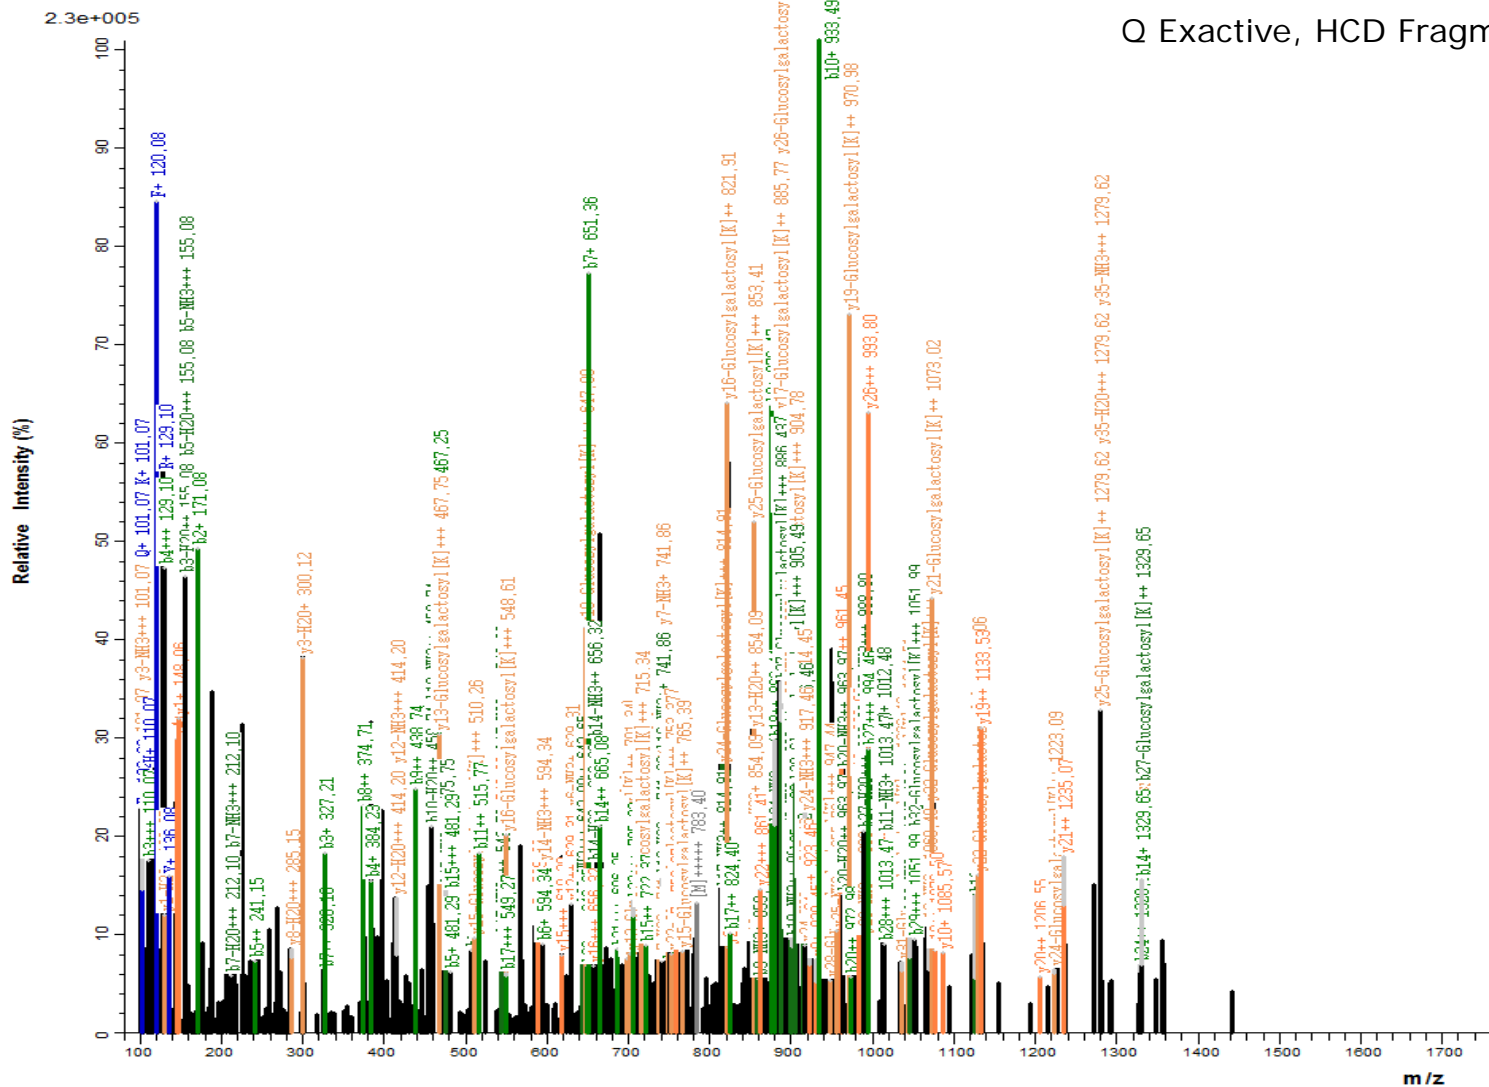

m/z = 1248.57,  
charge = +3

PSM showing the identification of Glucosylgalactosyl-HyK<sup>527</sup>

Mouse col4a1 chain

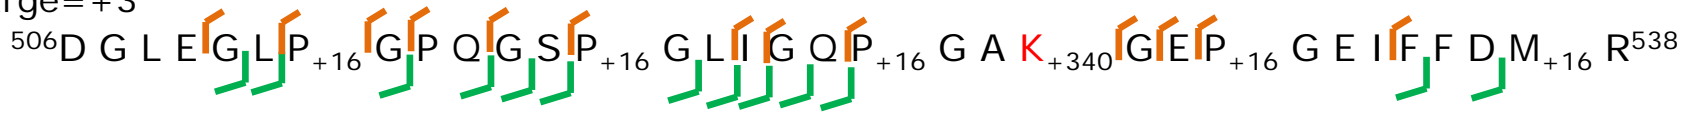

Q Exactive, HCD Fragmentation

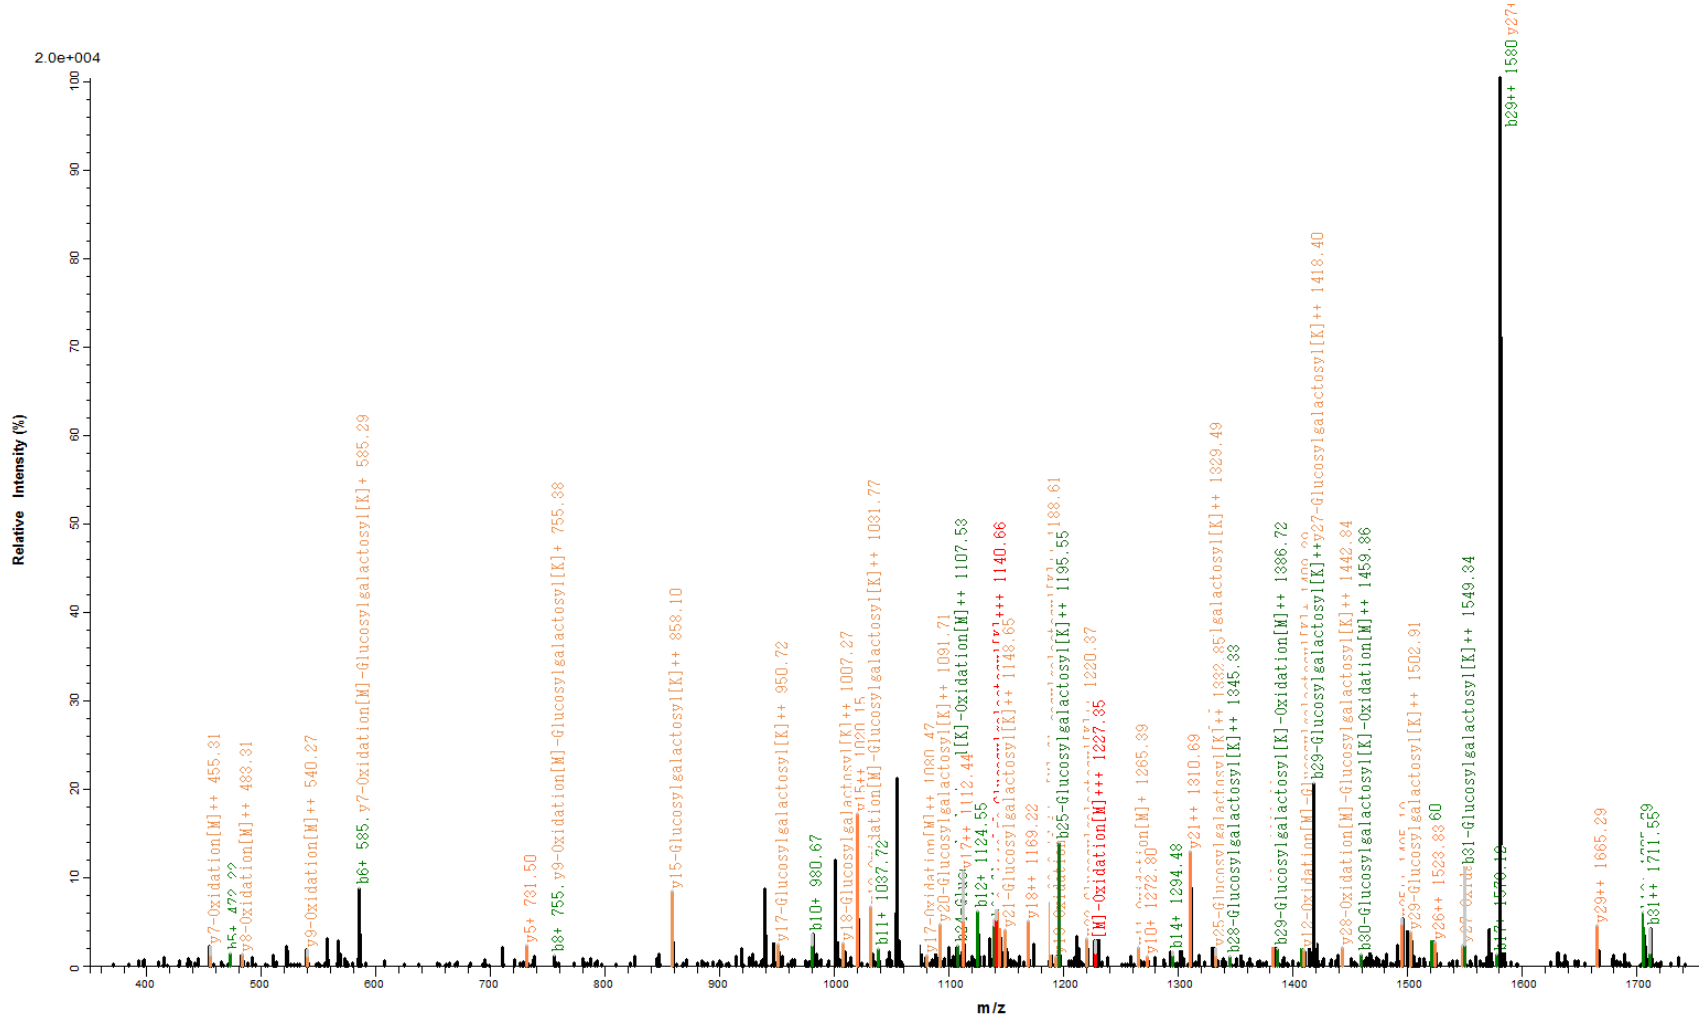



m/z = 1248.5738 ,  
charge = +3

PSM showing the identification of Glucosylgalactosyl-Hyk<sup>573,582</sup>

Mouse col4a1 chain

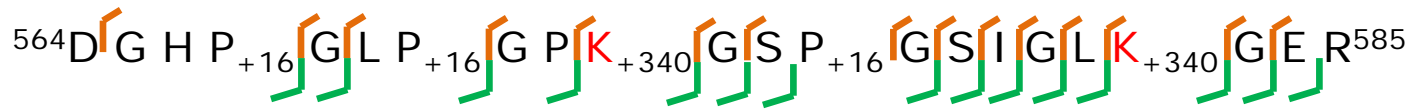

Orbitrap-Velos, ETD Fragmentation

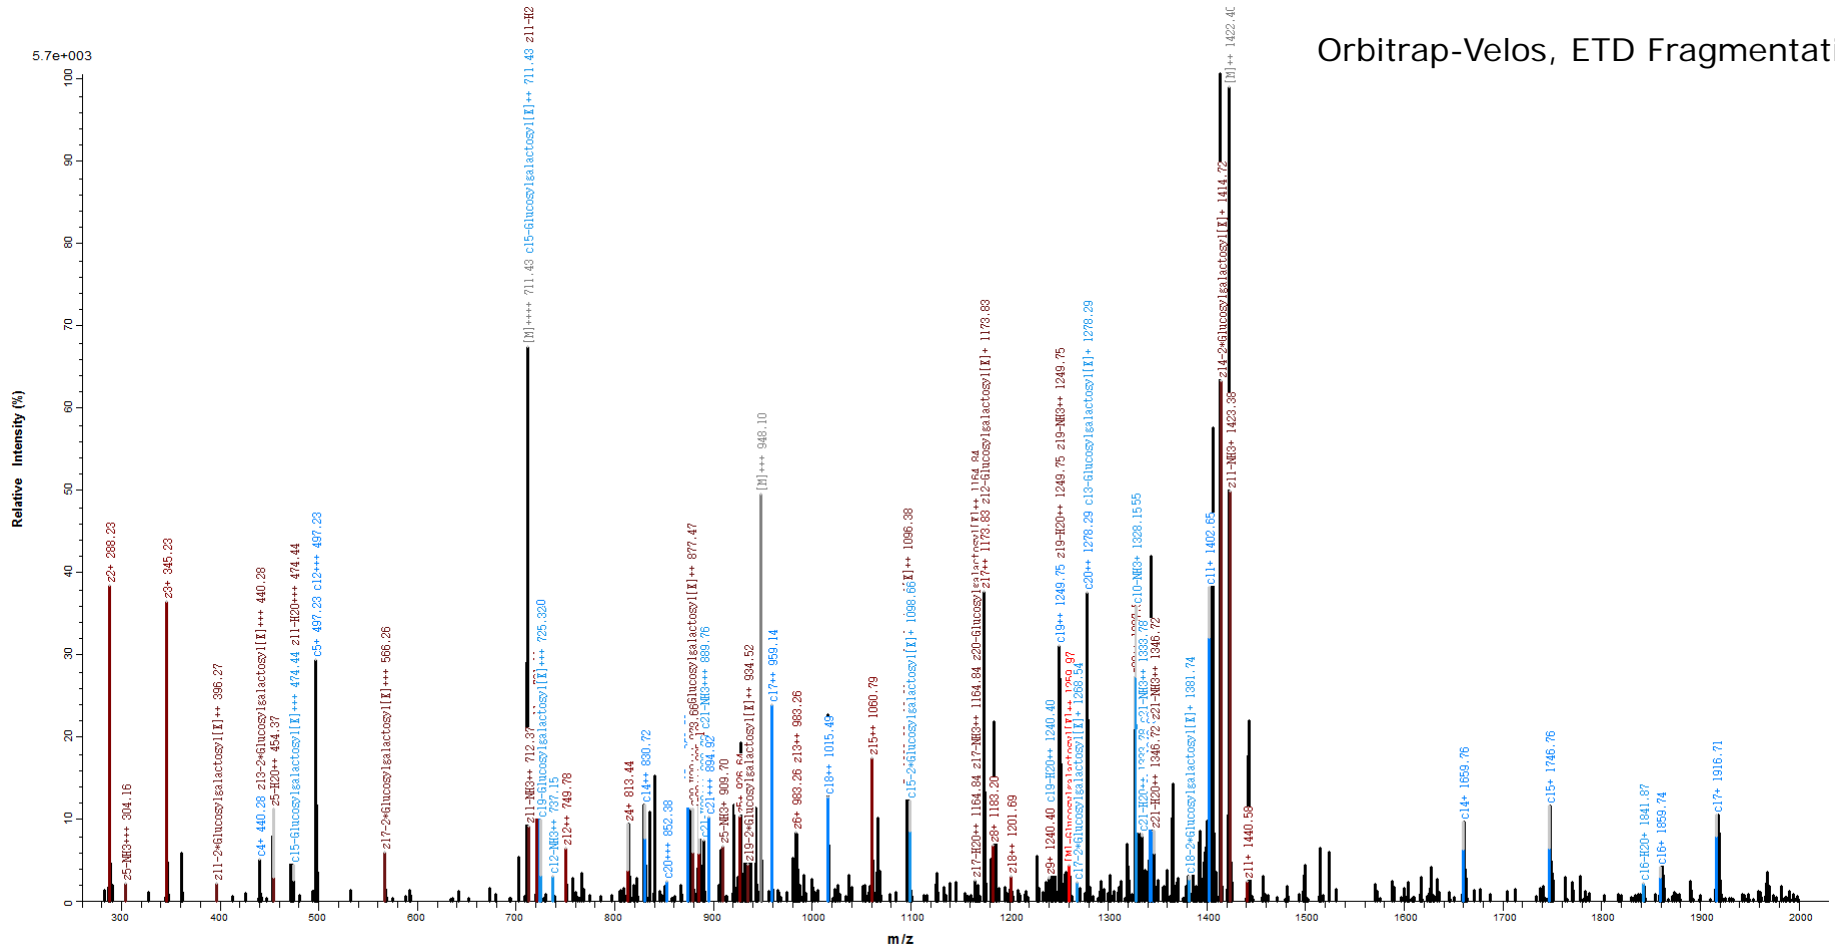

m/z = 655.5620 charge = +4

PSM showing the identification of Galactosyl-HyK<sup>573</sup>

Mouse col4a1 chain

559G T P<sub>+16</sub> G R D G H P<sub>+16</sub> G L P<sub>+16</sub> G P K<sub>+178</sub> G S P<sub>+16</sub> G S I G L K<sub>+16</sub> G E R G P P<sub>+16</sub> G G V G F P<sub>+16</sub> G S I R<sup>597</sup>

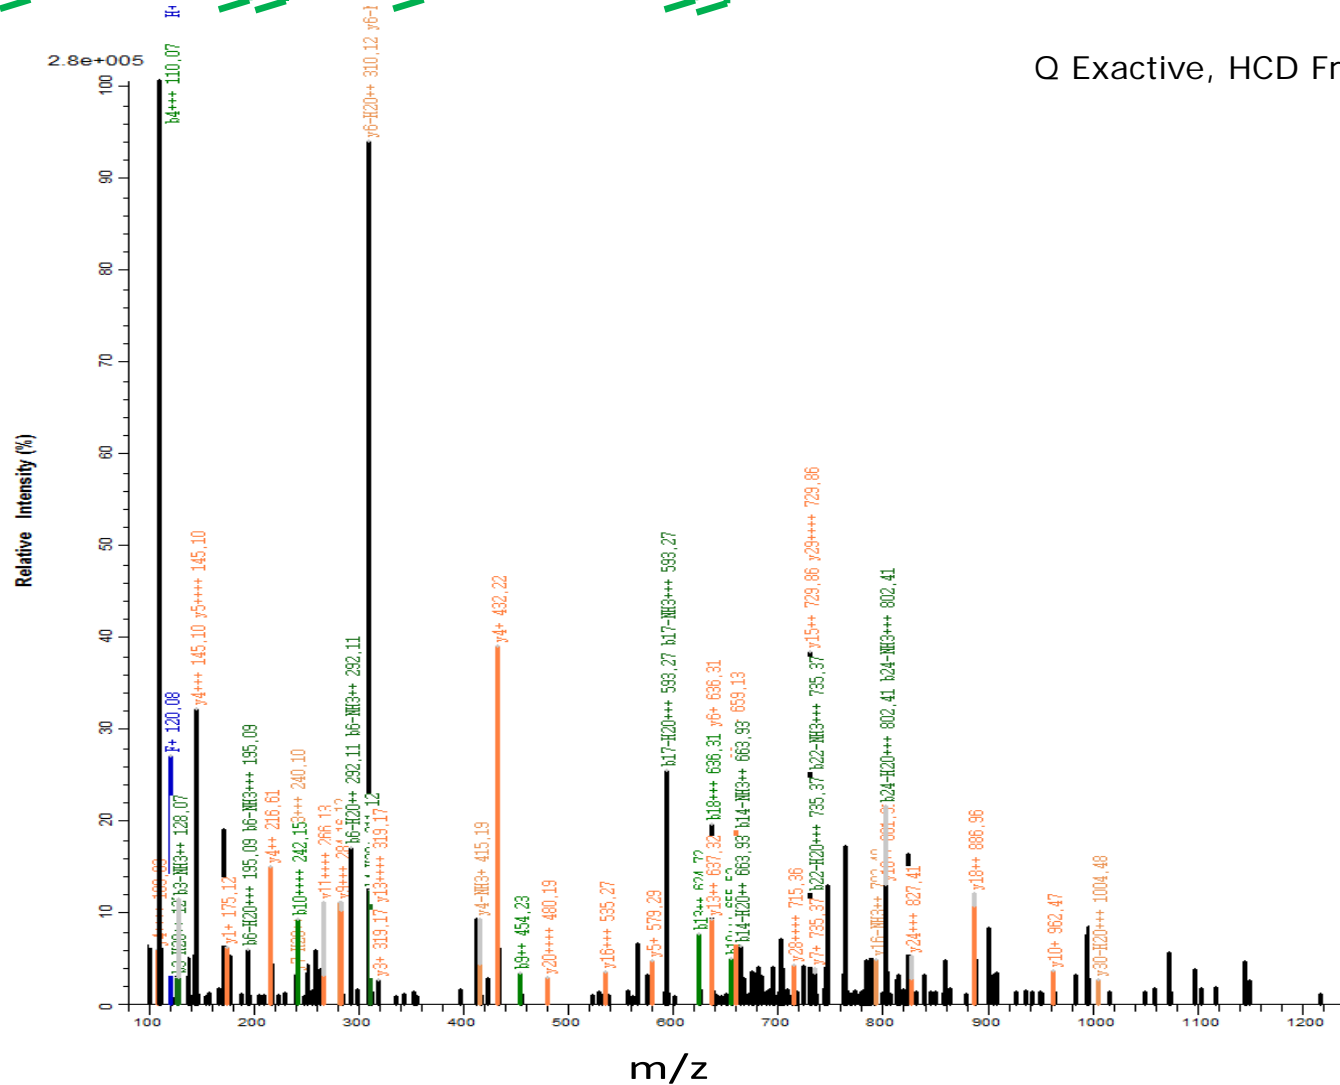

m/z= 1140.2943 charge= +4

PSM showing the identification of Glucosylgalactosyl-HyK<sup>617,635</sup>

Mouse col4a1 chain

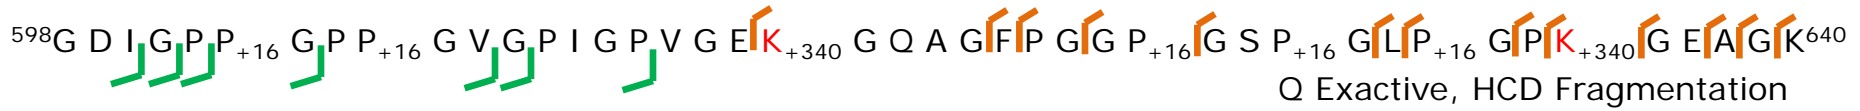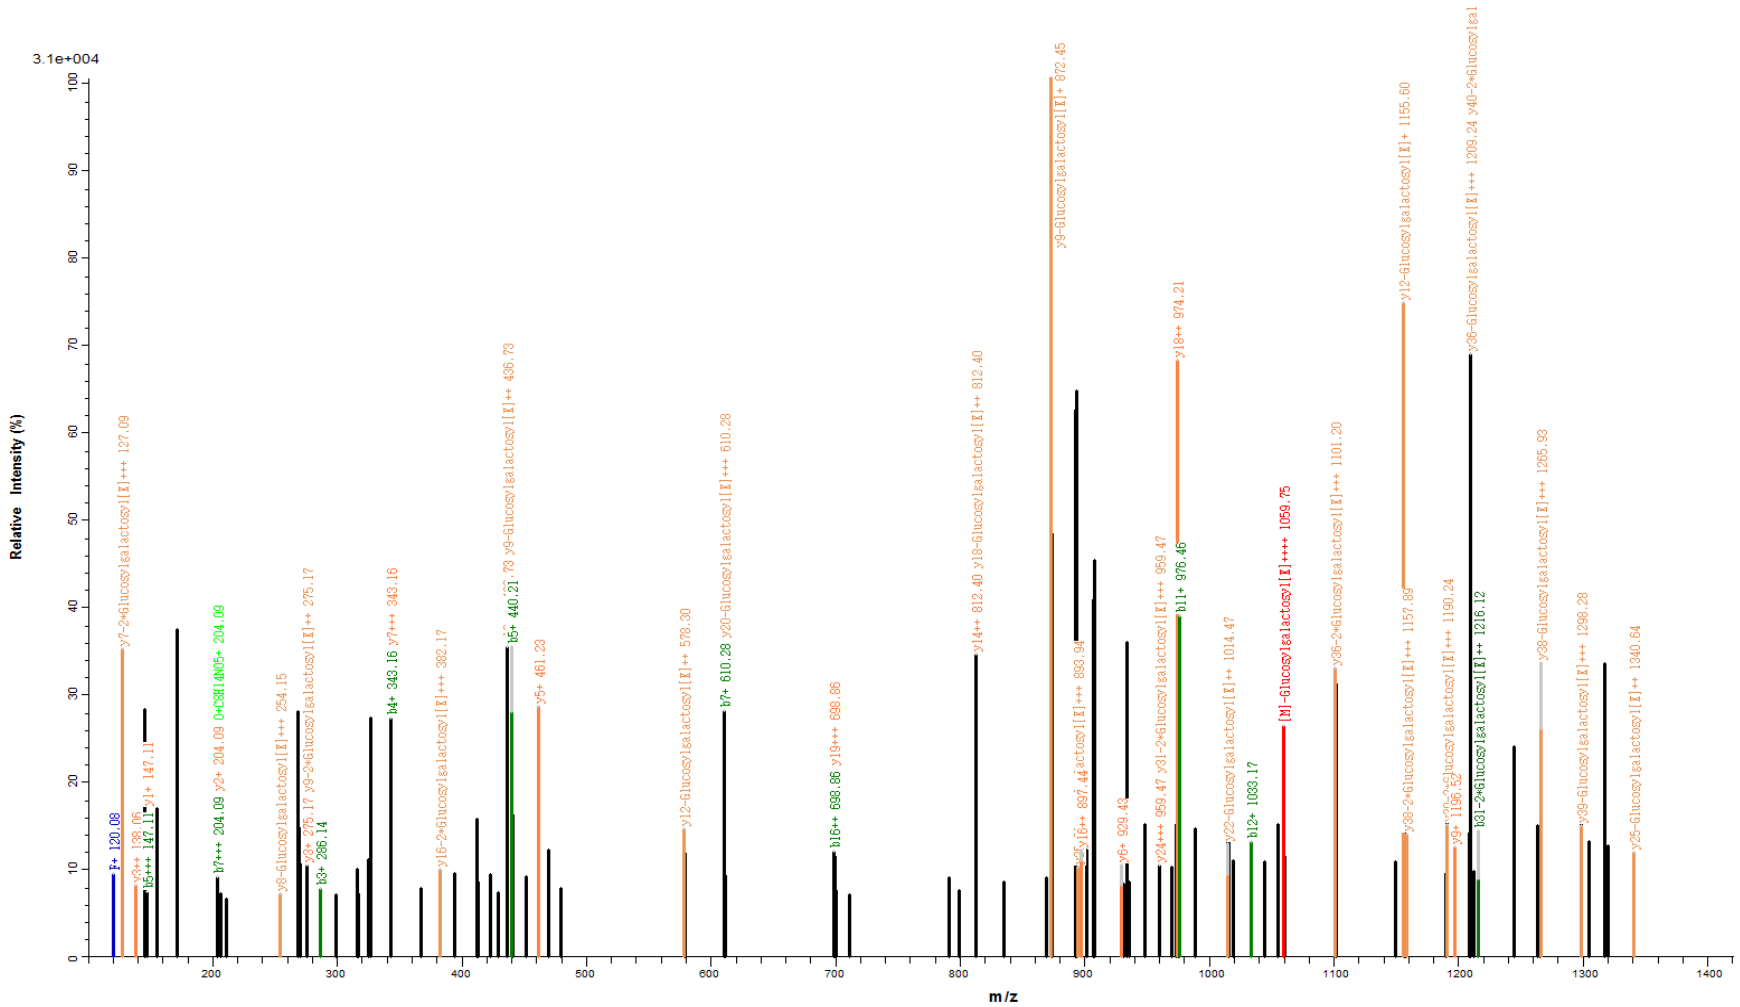

m/z= 866.9266charge= +4

PSM showing the identification of Glucosylgalactosyl-HyK<sup>681</sup>

Mouse col4a1 chain

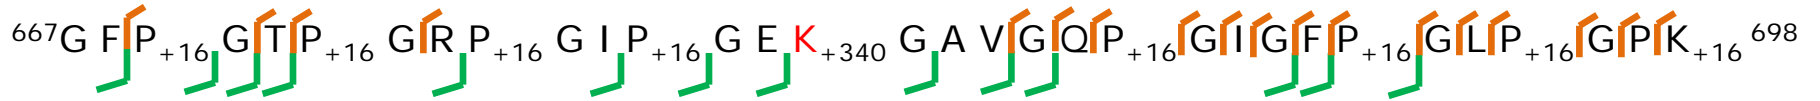

Q Exactive, HCD Fragmentation

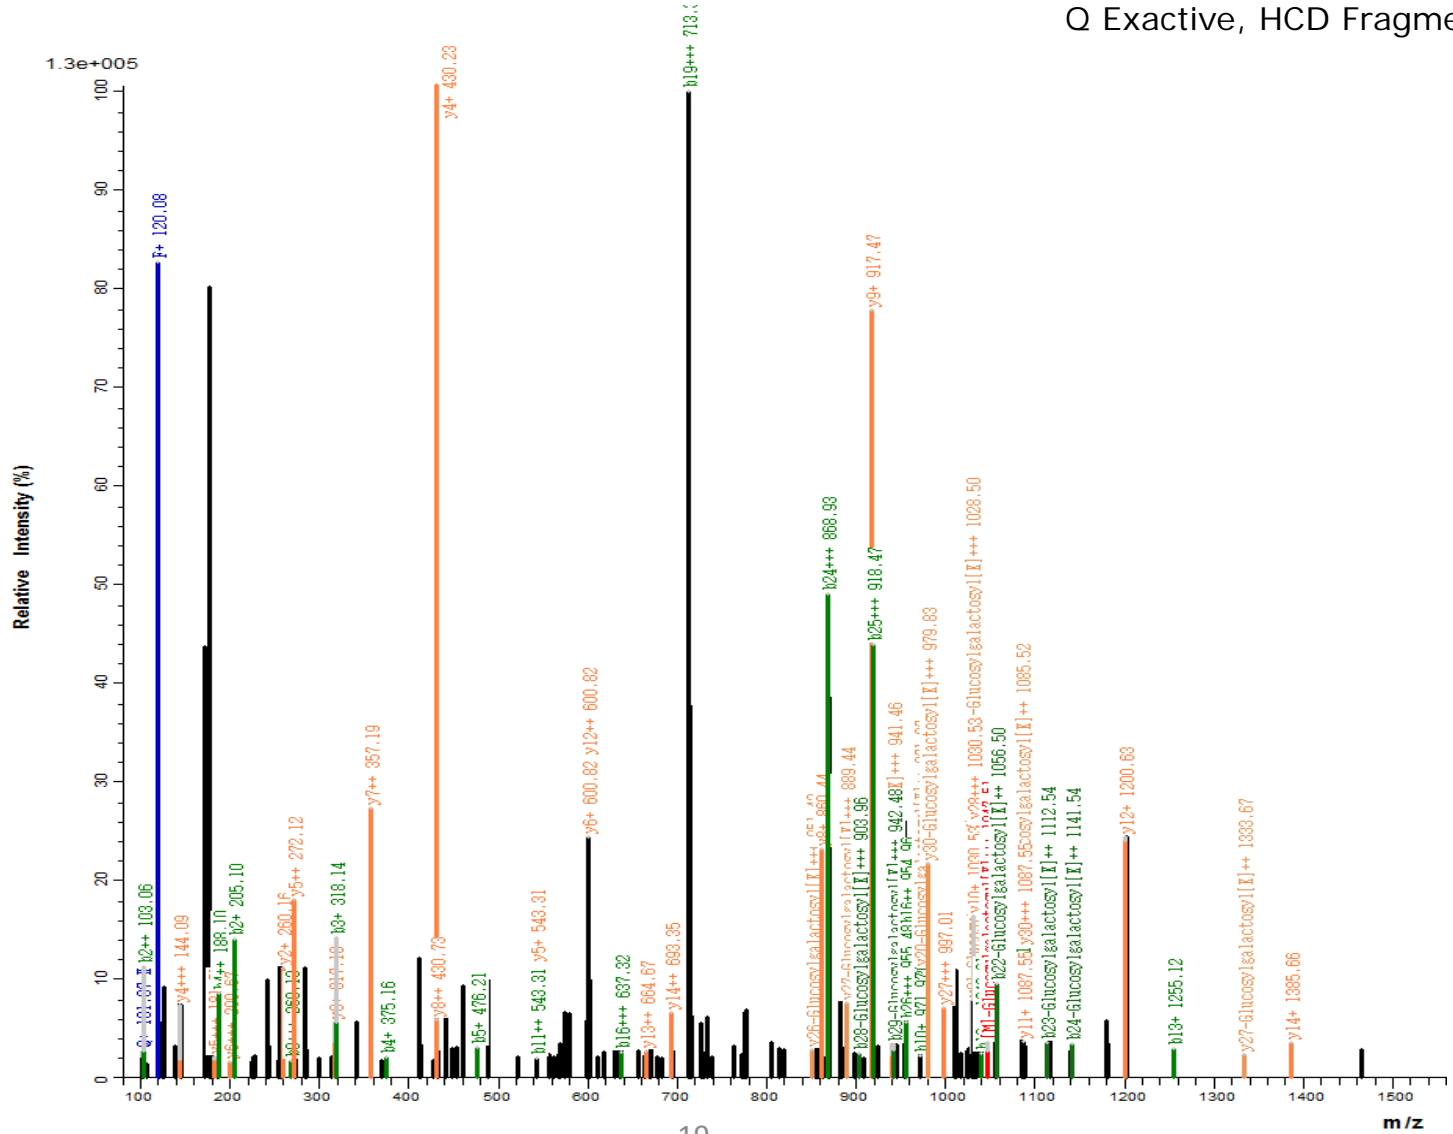

m/z= 1010.4997 charge=+4

PSM showing the identification of Glucosylgalactosyl-HyK<sup>757</sup>

Mouse col4a1 chain

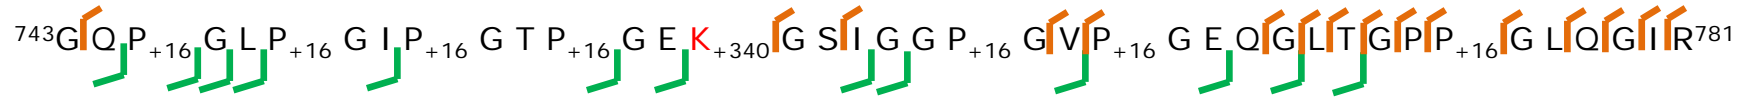

Q Exactive, HCD Fragmentation

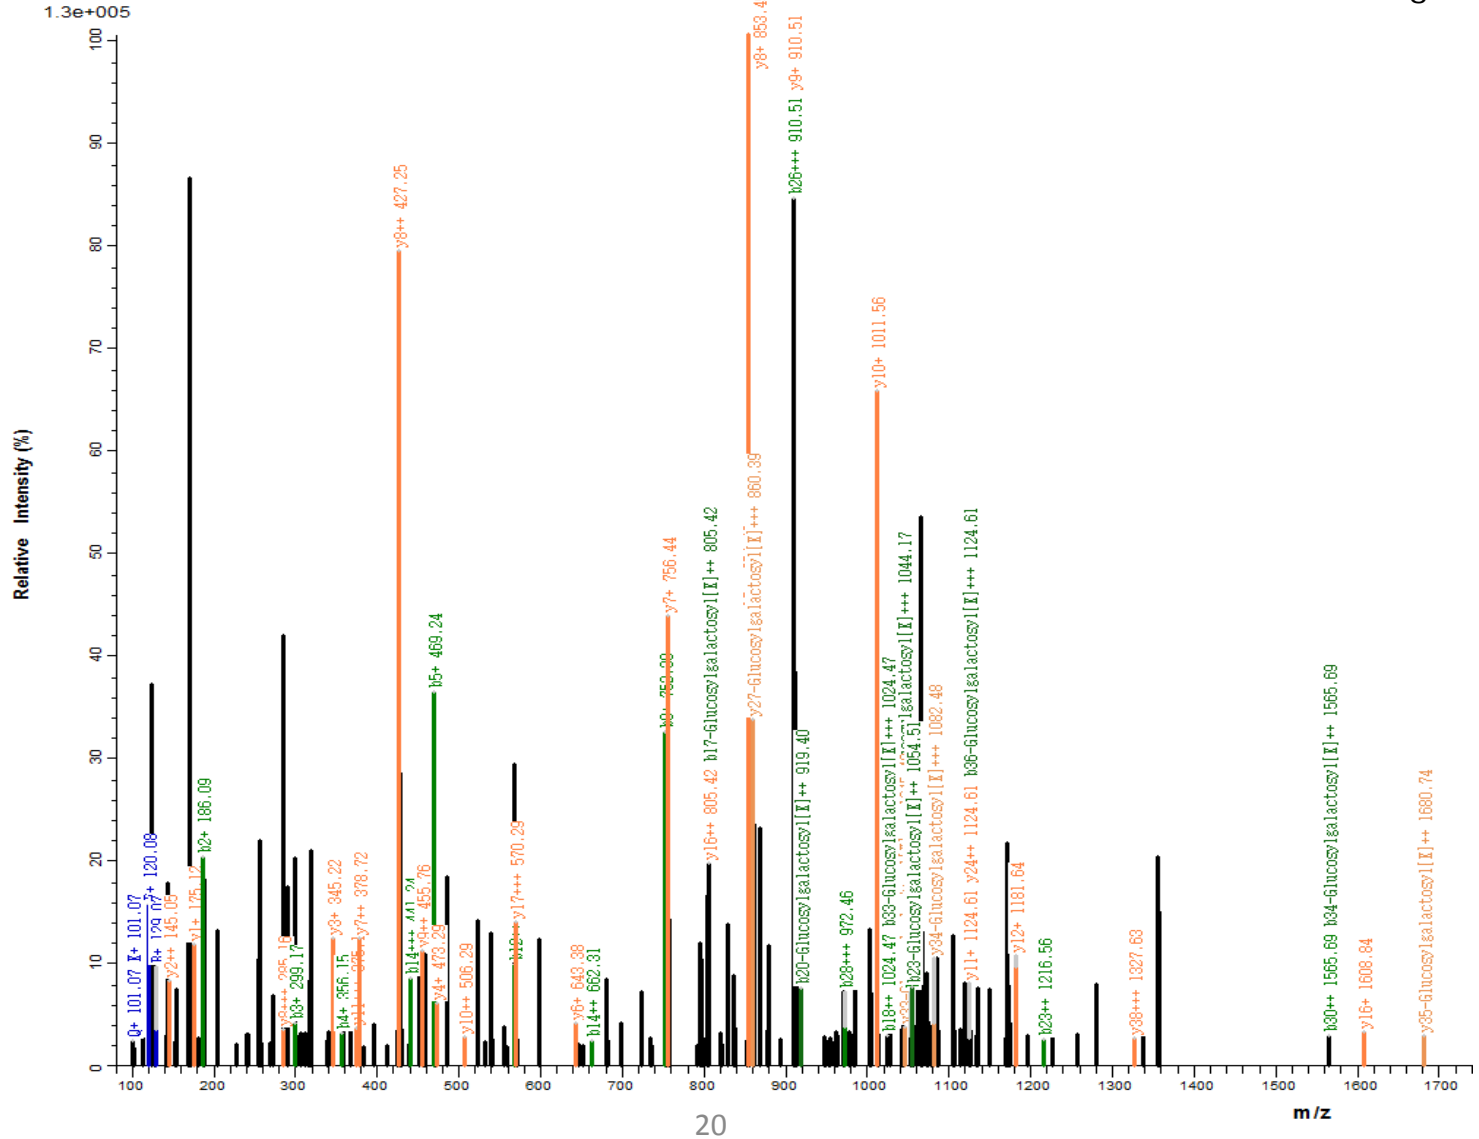



m/z= 849.7198,  
charge= +6

PSM showing the identification of Galactosyl-HyK<sup>825</sup> & Glucosylgalactosyl-HyK<sup>828</sup>

Mouse col4a1 chain

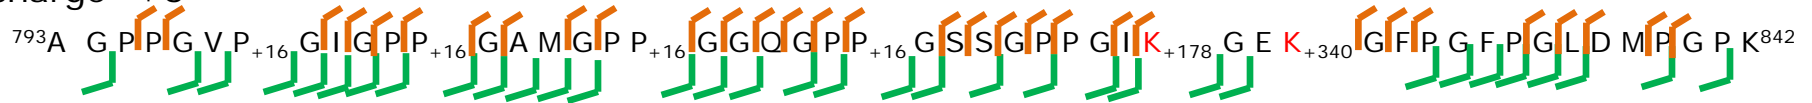

Q Exactive, HCD Fragmentation

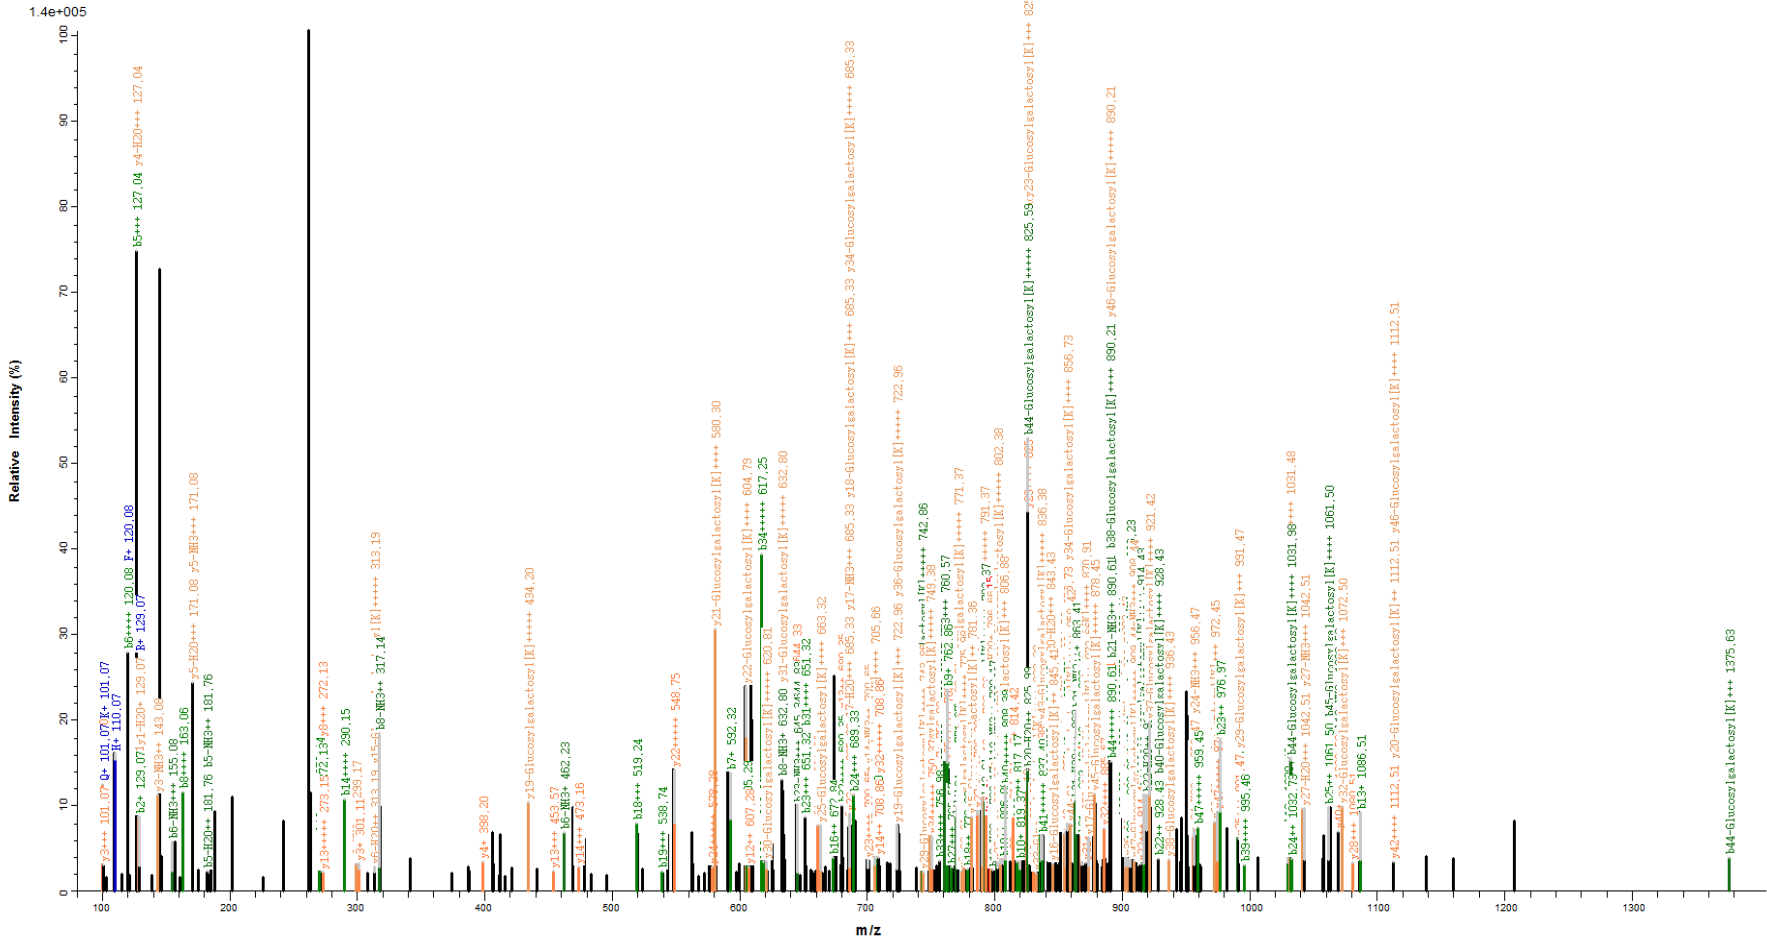

m/z= 627.9313 charge= +6

PSM showing the identification of Glucosylgalactosyl-HyK<sup>1025</sup>

Mouse col4a1 chain

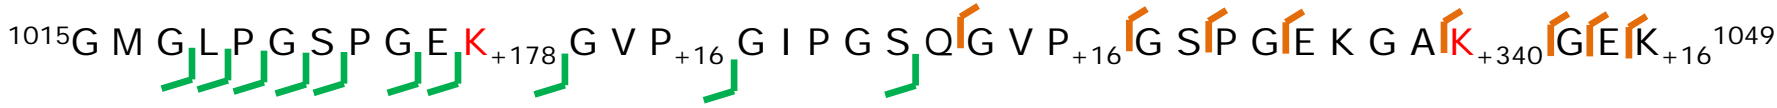

Orbitrap-Velos, CID Fragmentation

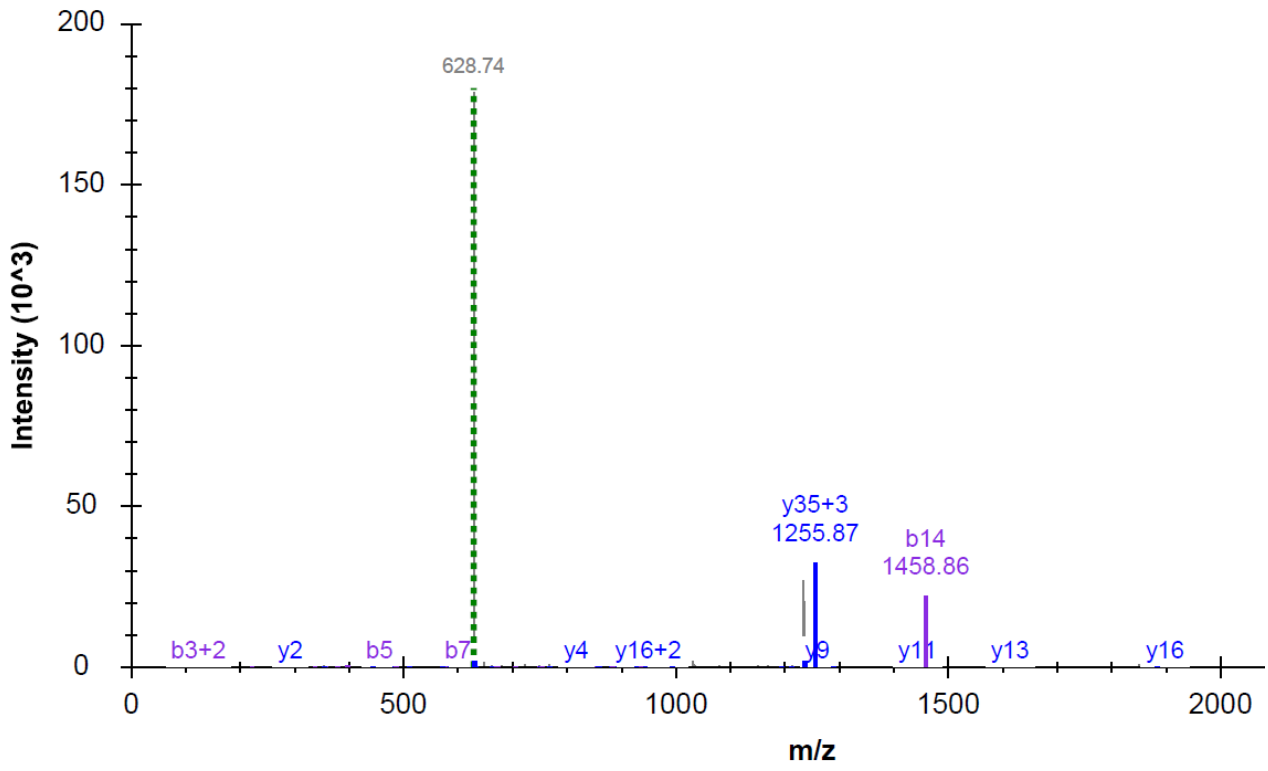



m/z = 702.6838  
charge = +6

PSM showing the identification of Galactosyl-HyK<sup>1046</sup> & Glucosylgalactosyl-HyK<sup>1049</sup>

Mouse col4a1 chain

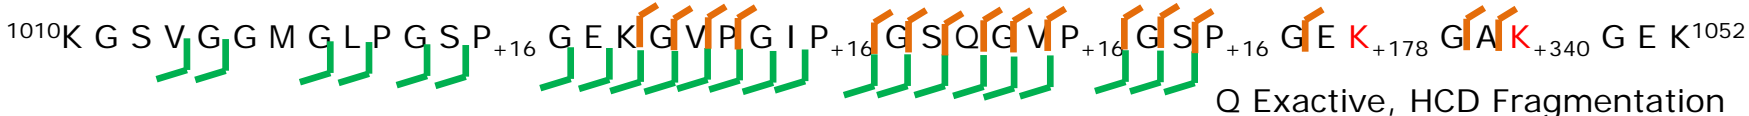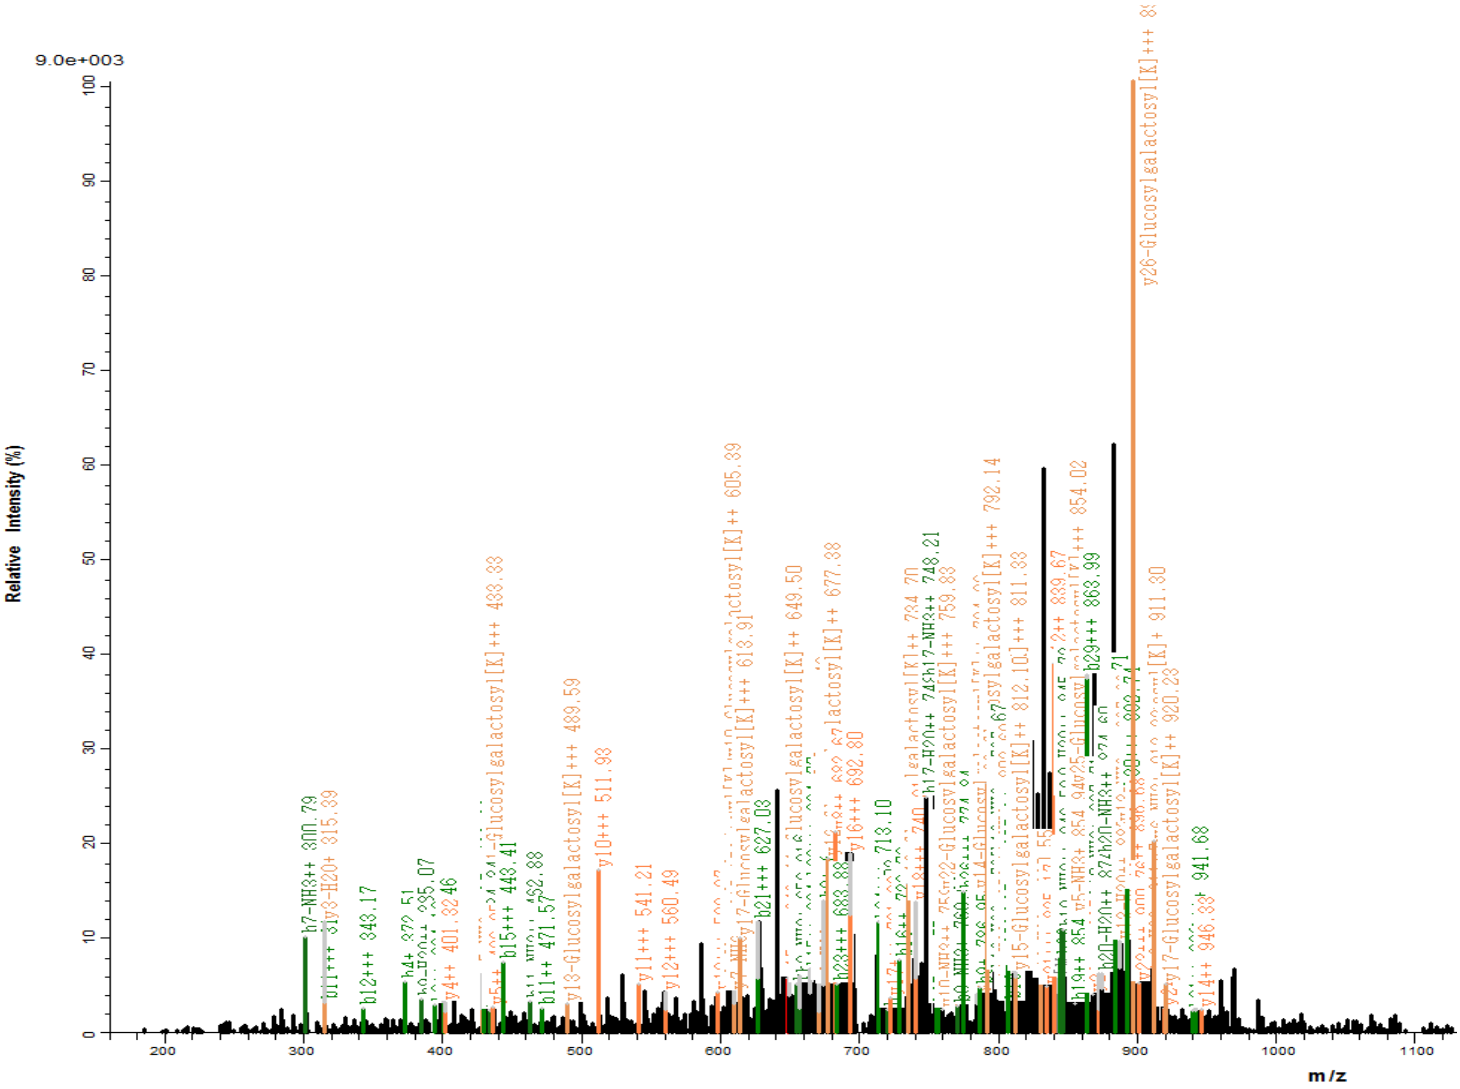

m/z = 791.01 charge = +6

PSM showing the identification of Galactosyl-HyK<sup>1081</sup>

Mouse col4a1 chain

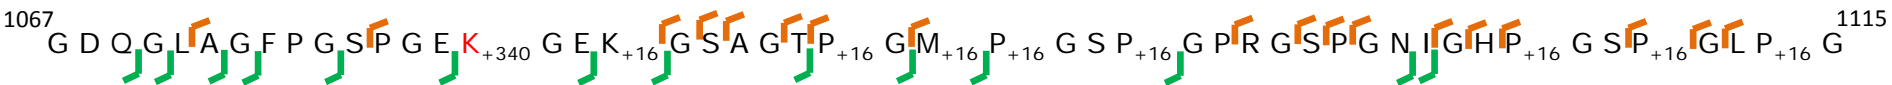

Q Exactive, HCD Fragmentation

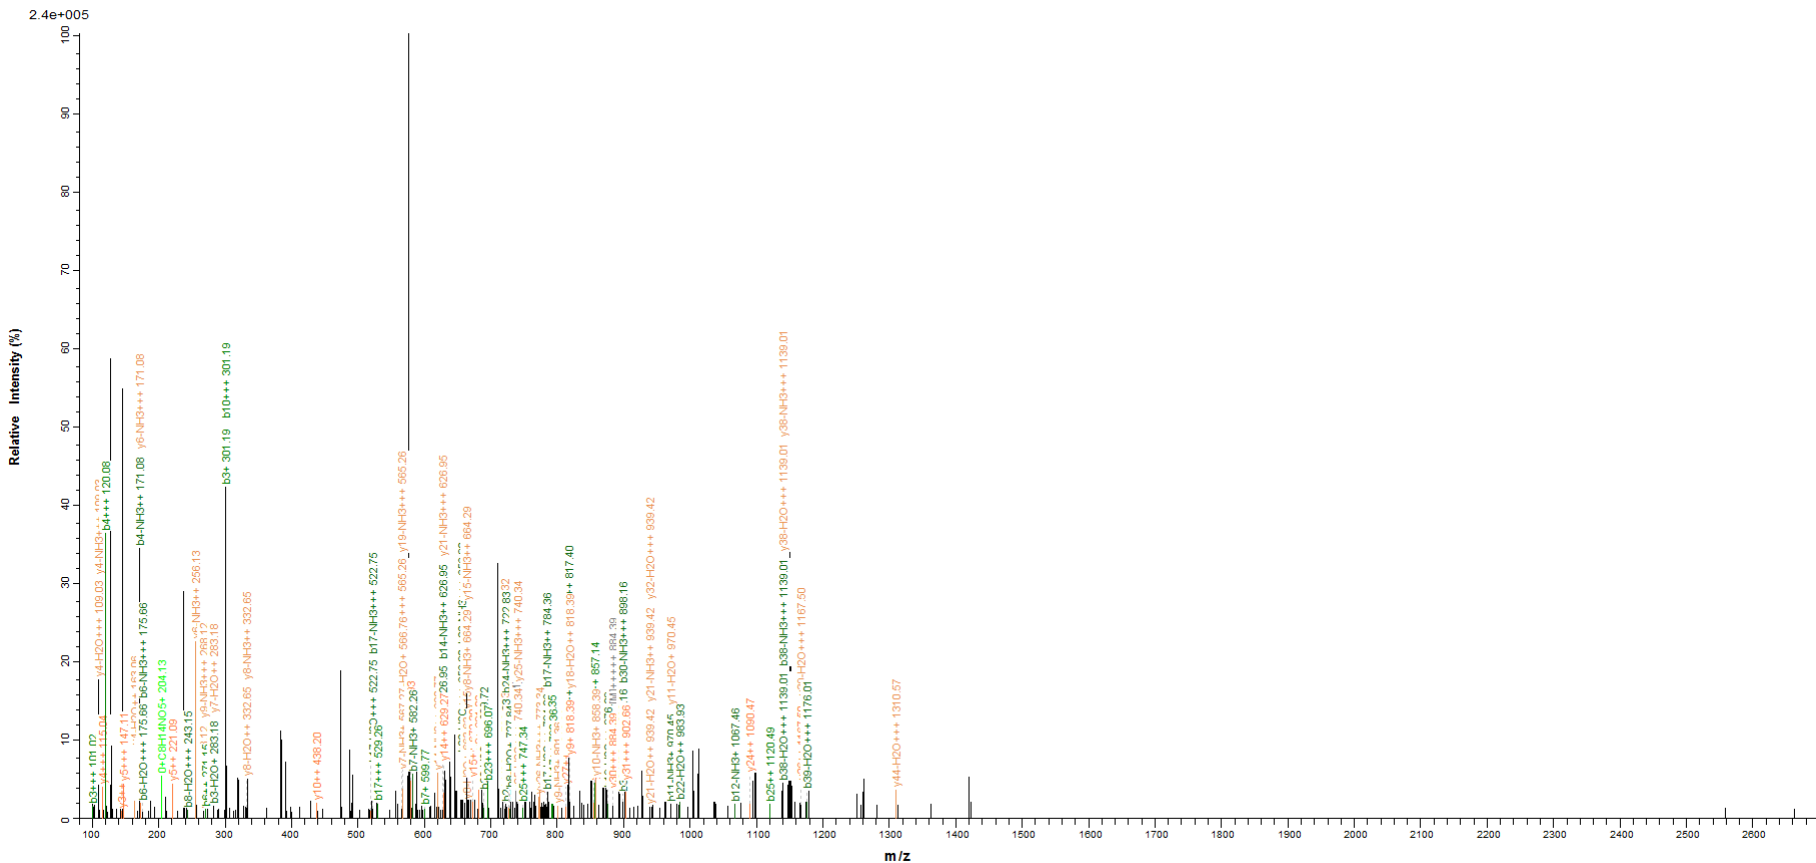

m/z = 793.6757 charge = +6

PSM showing the identification of Galactosyl-HyK<sup>1117</sup>

Mouse col4a1 chain

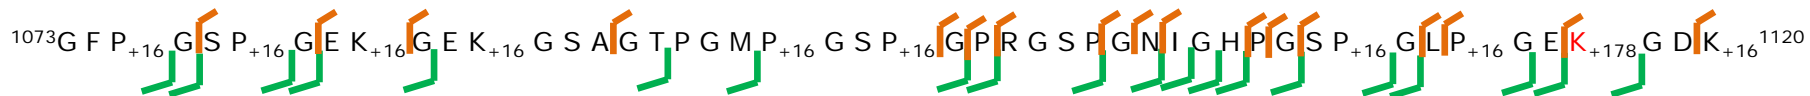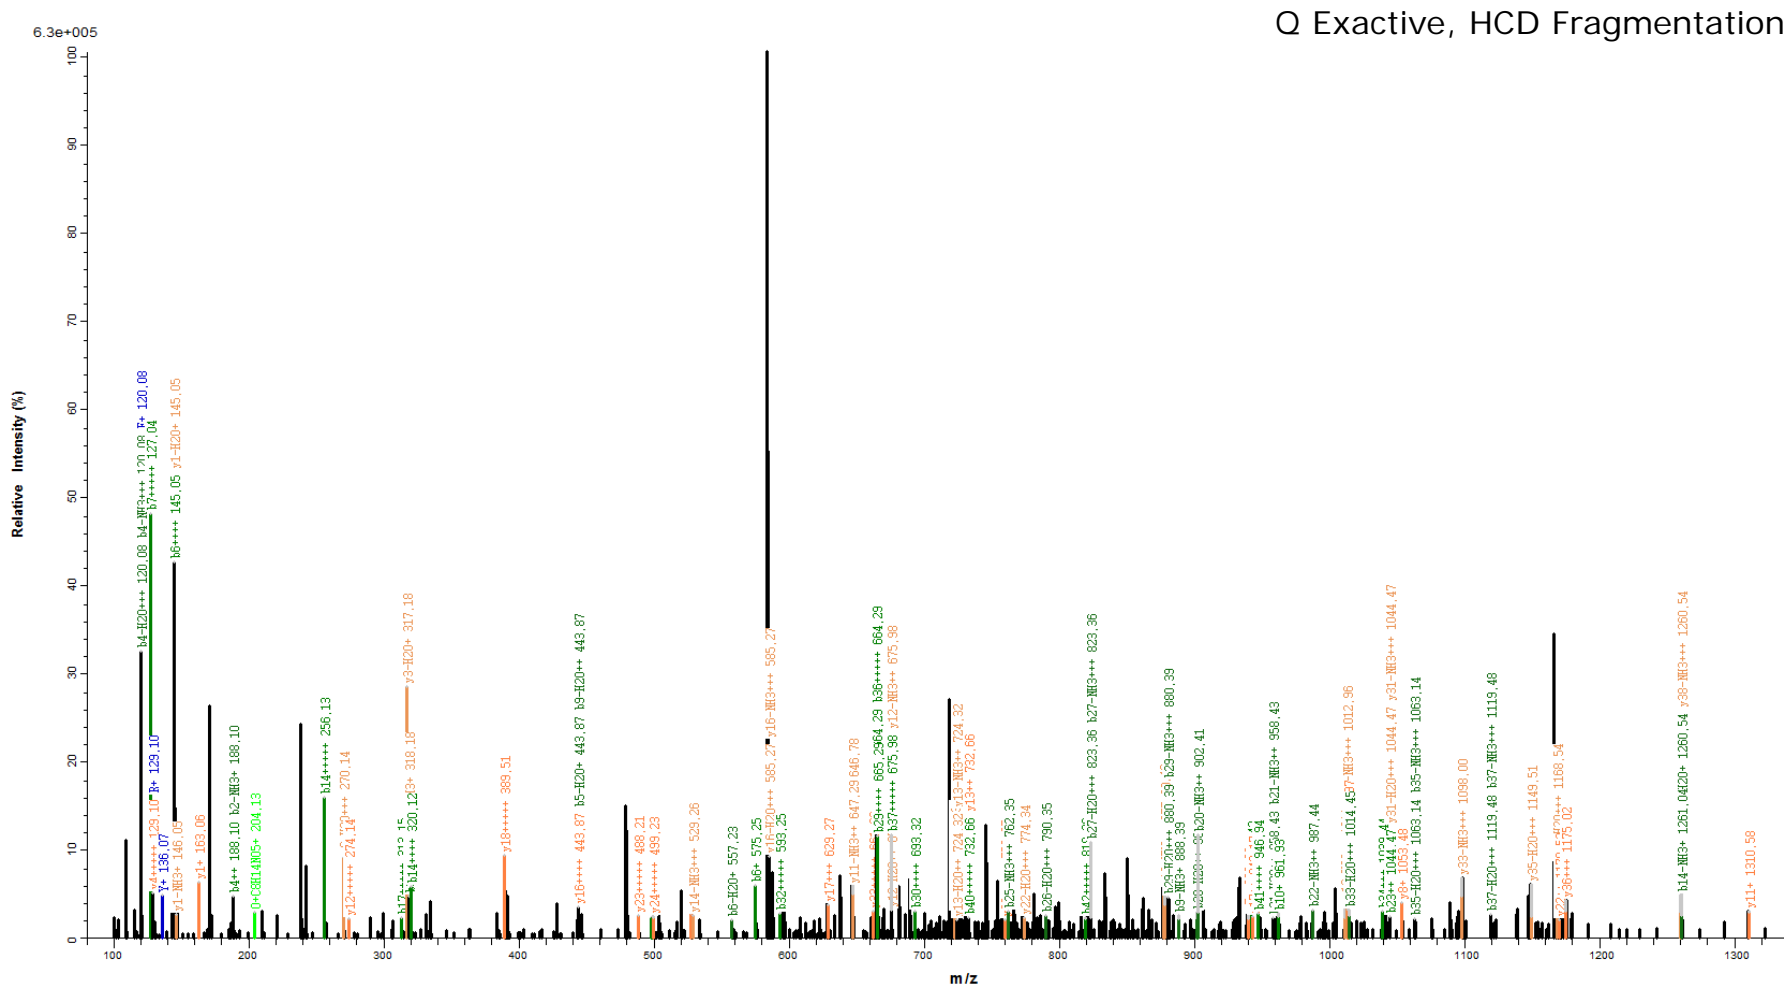

m/z= 655.5620 charge= +4

PSM showing the identification of Glucosylgalactosyl-HyK<sup>1120</sup>

Mouse col4a1 chain

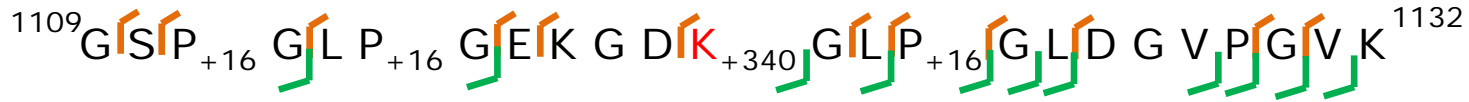

Orbitrap-Velos, ETD Fragmentation

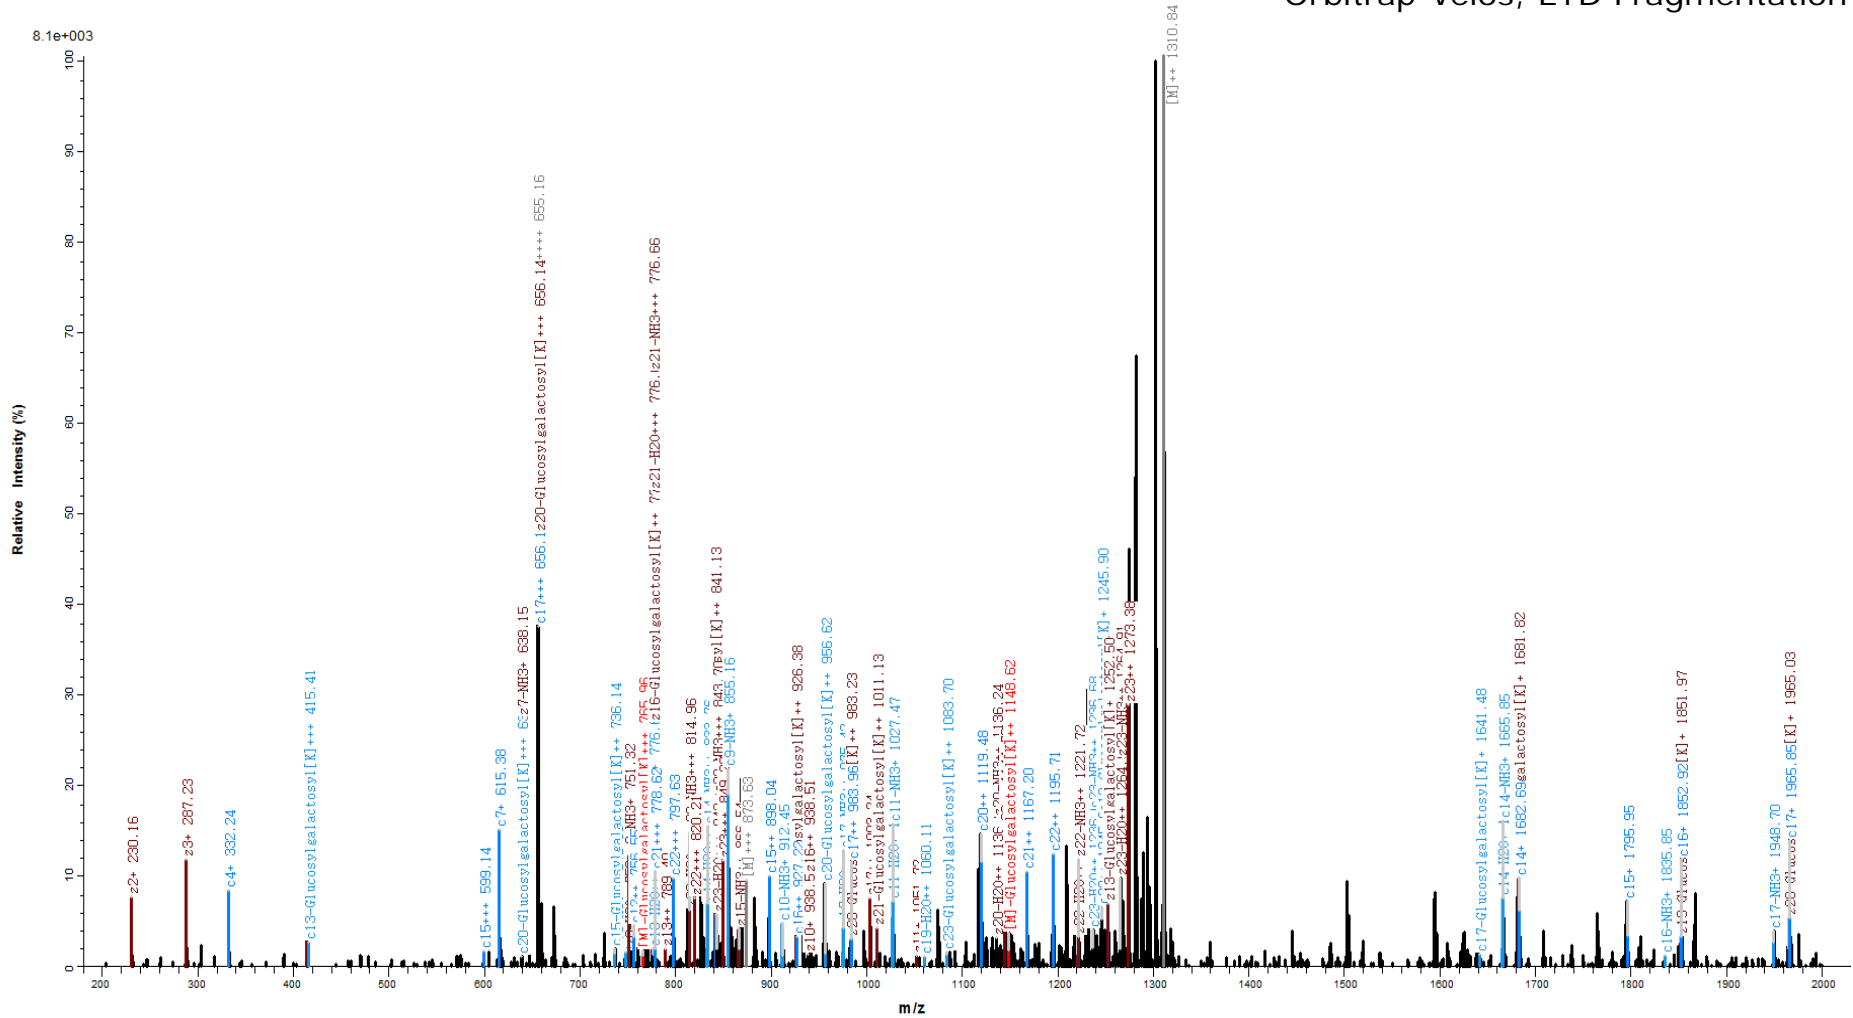





m/z= 1014.0001 charge= +2

PSM showing the identification of Glucosylgalactosyl-HyK<sup>1206</sup>

Mouse col4a1 chain

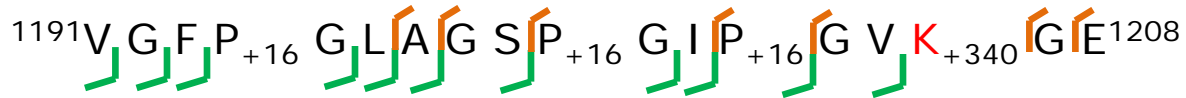

Q Exactive, HCD Fragmentation

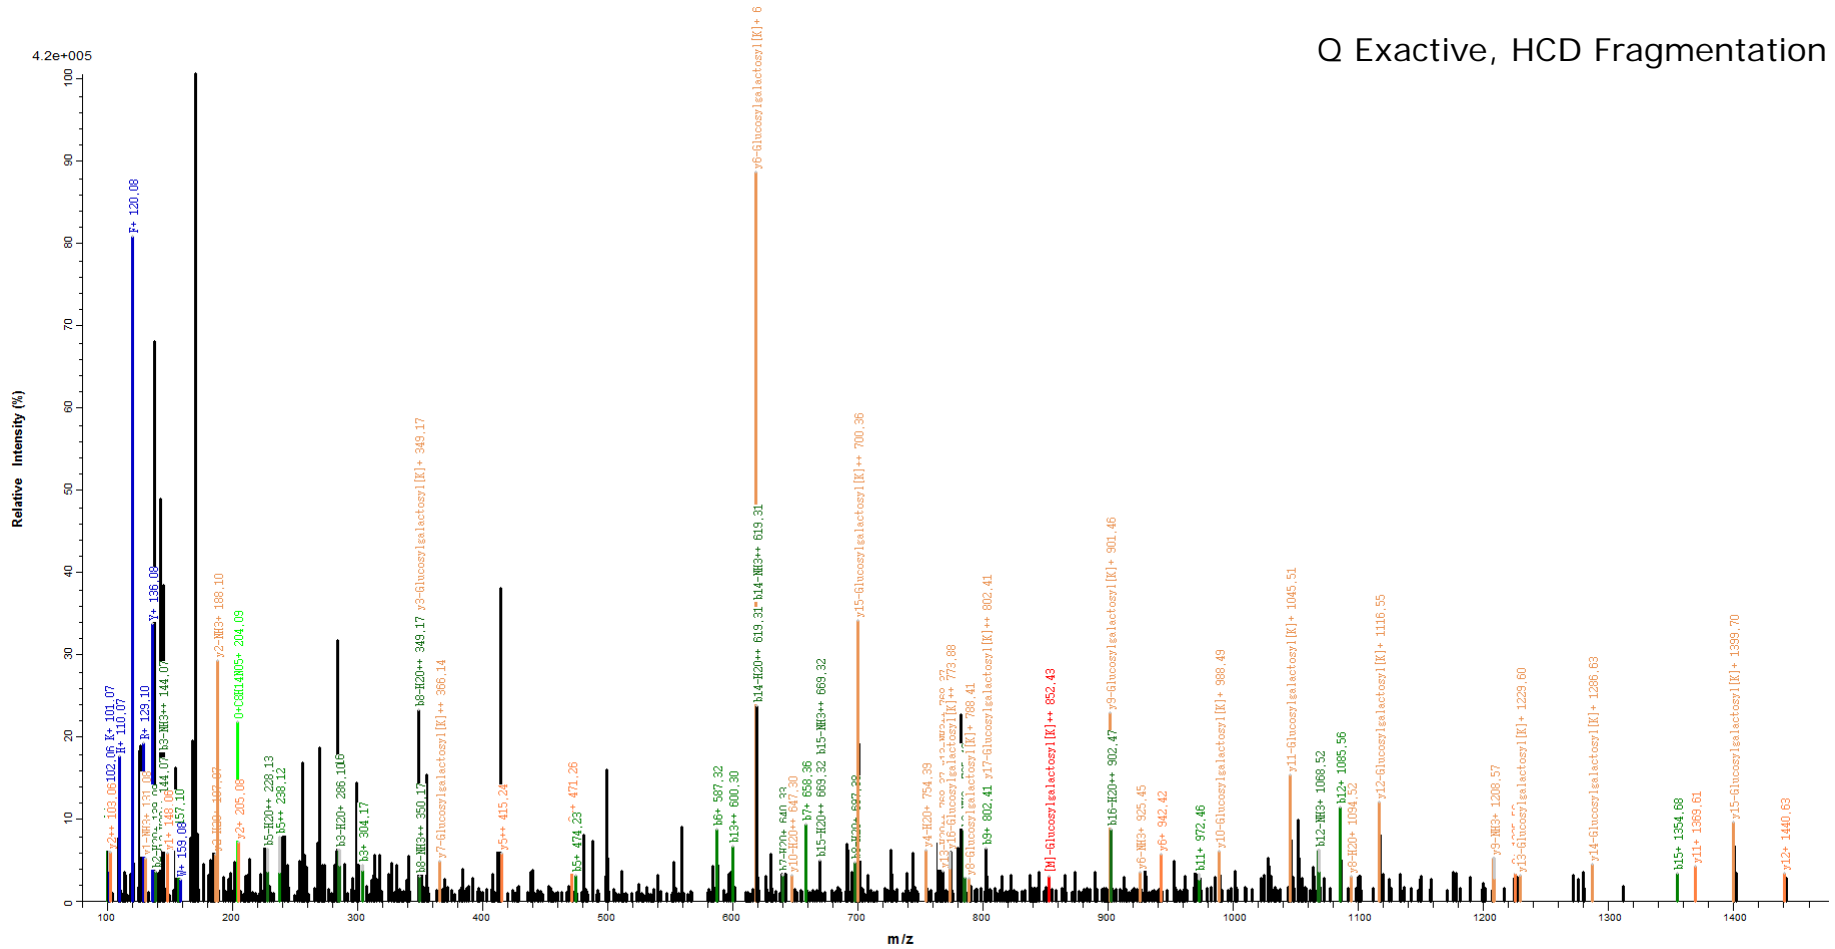





m/z = 956.6473,  
charge = +5

PSM showing the identification of Galactosyl-HyK<sup>1283,1304</sup>

Mouse col4a1 chain

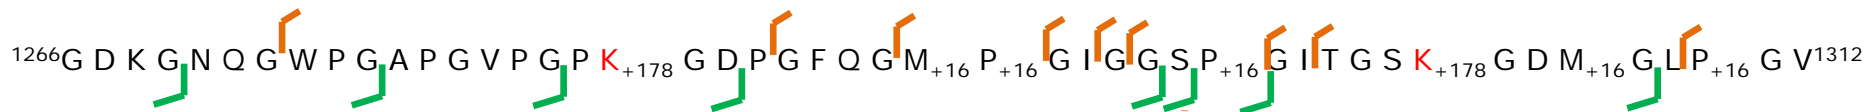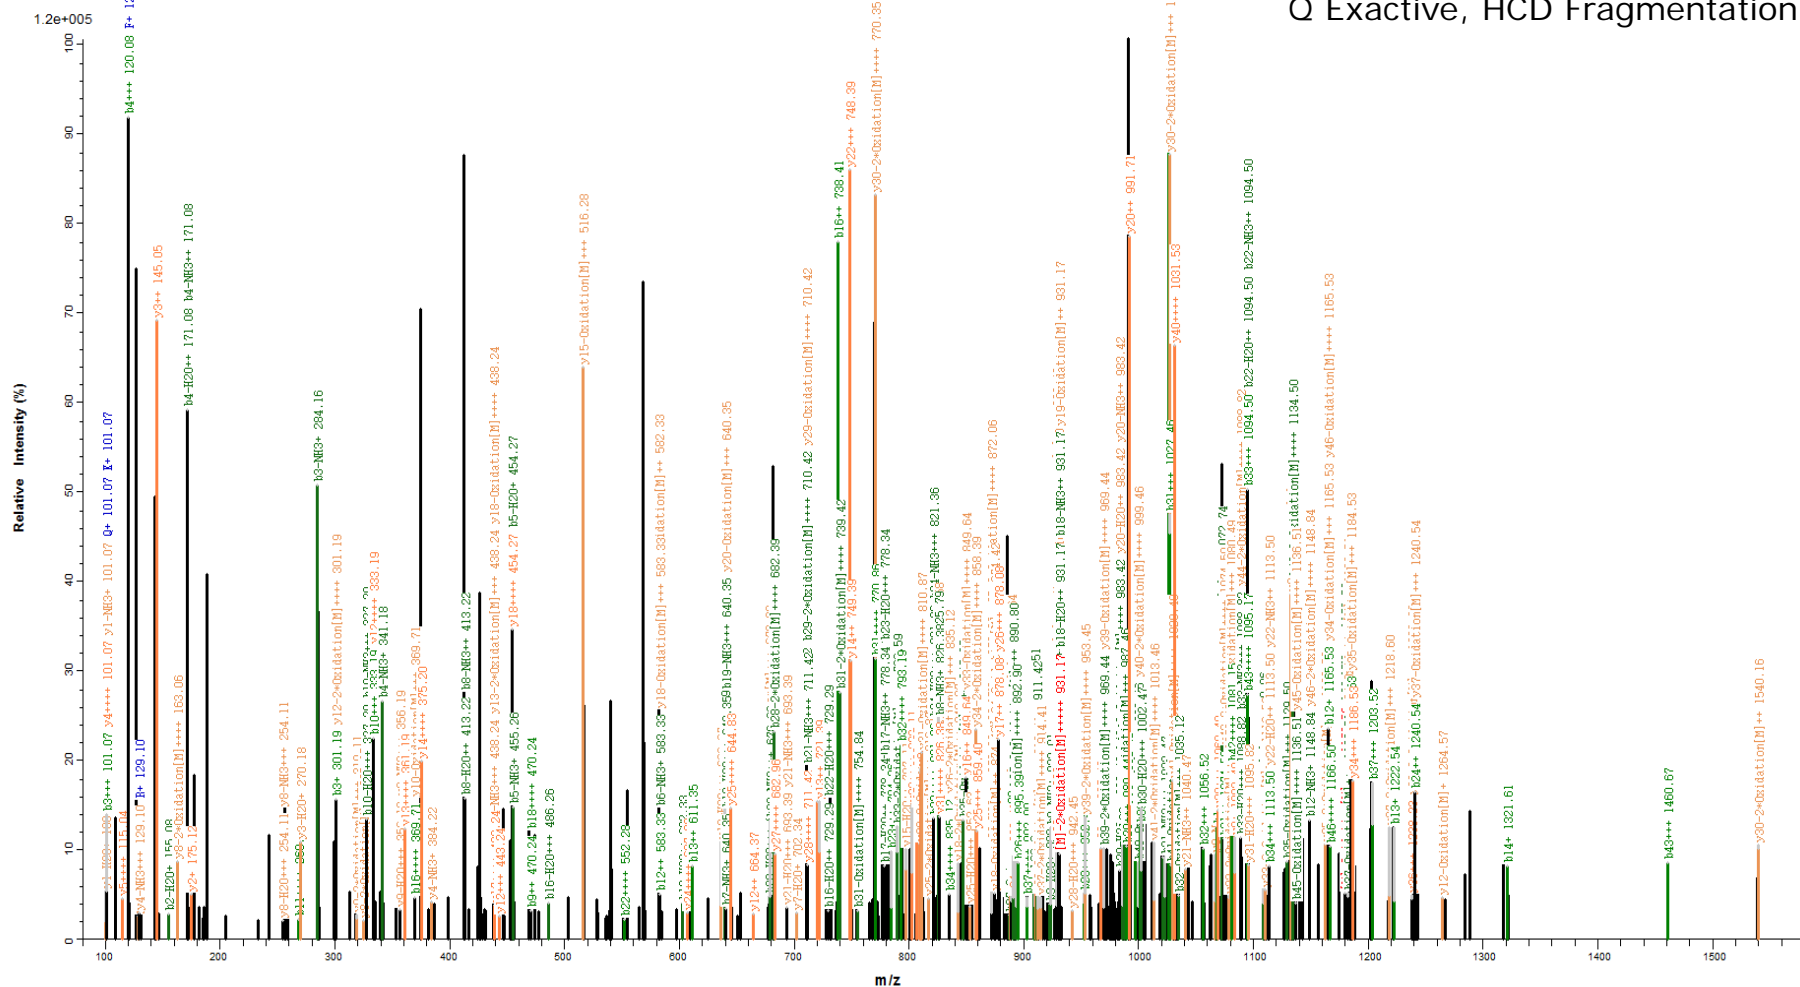

m/z = 489.4524,  
charge = +4

PSM showing the identification of Galactosyl-HyK<sup>1371</sup>

Mouse col4a1 chain

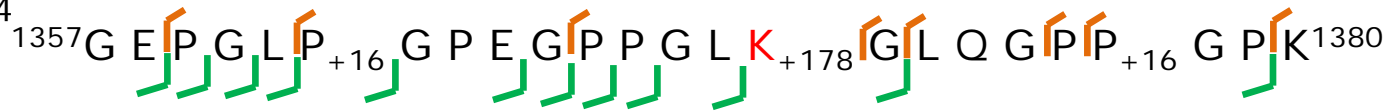

Q Exactive, HCD Fragmentation

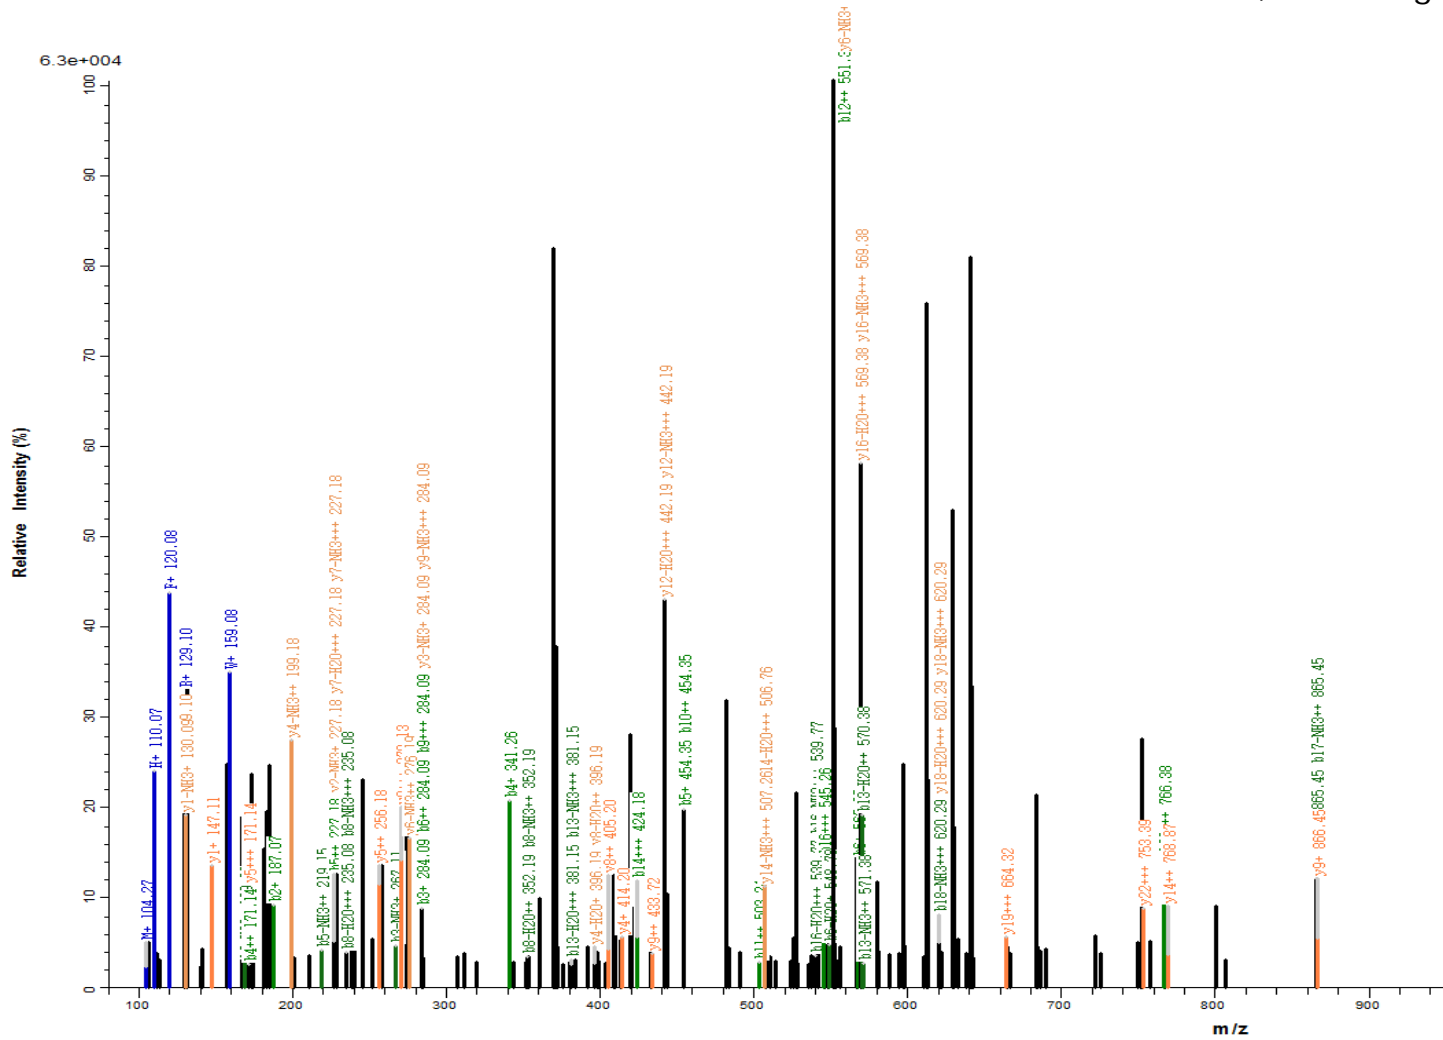

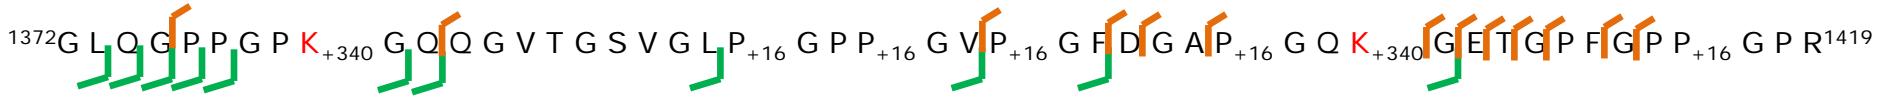

Q Exactive, HCD Fragmentation

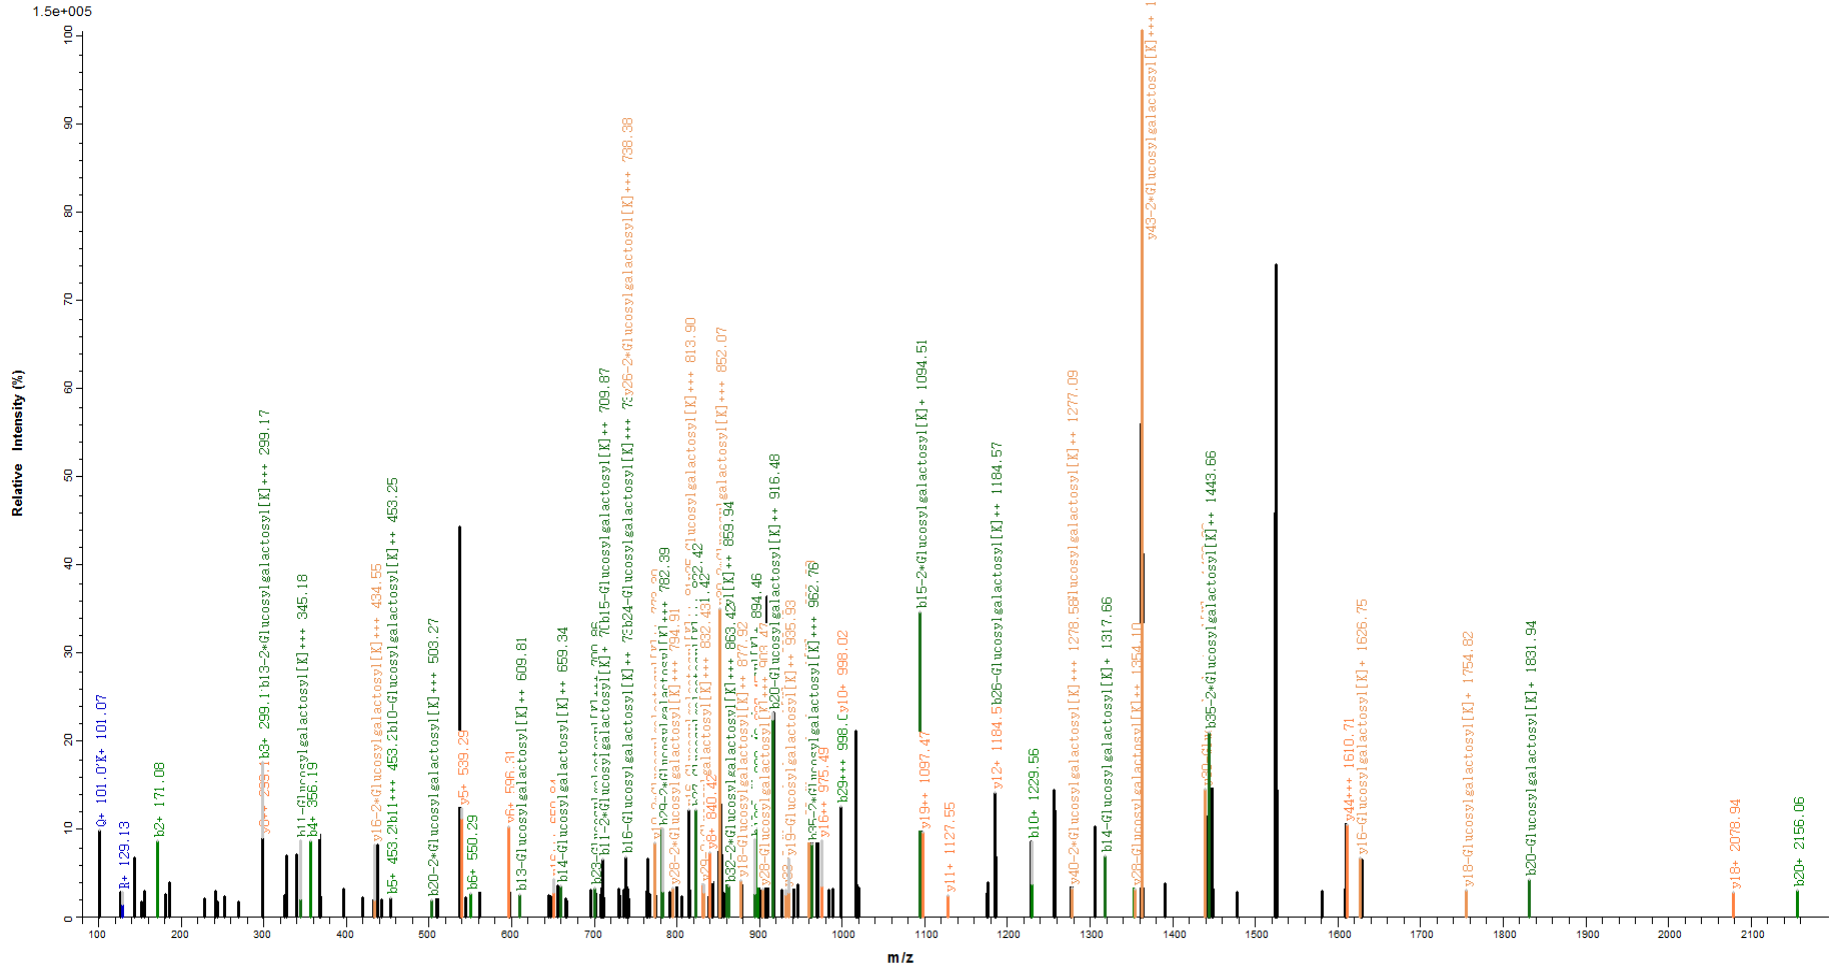

m/z= 1141.5 (+2)

PSM showing the identification of 3-HyP<sup>444</sup>

Mouse col4a1 chain

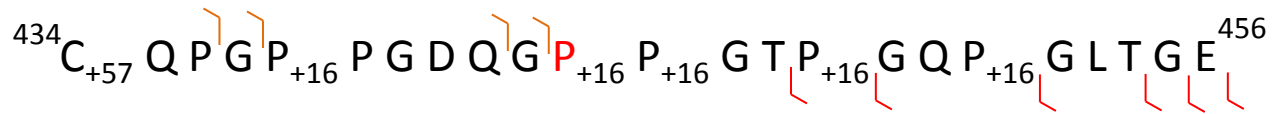

Q Exactive, HCD Fragmentation

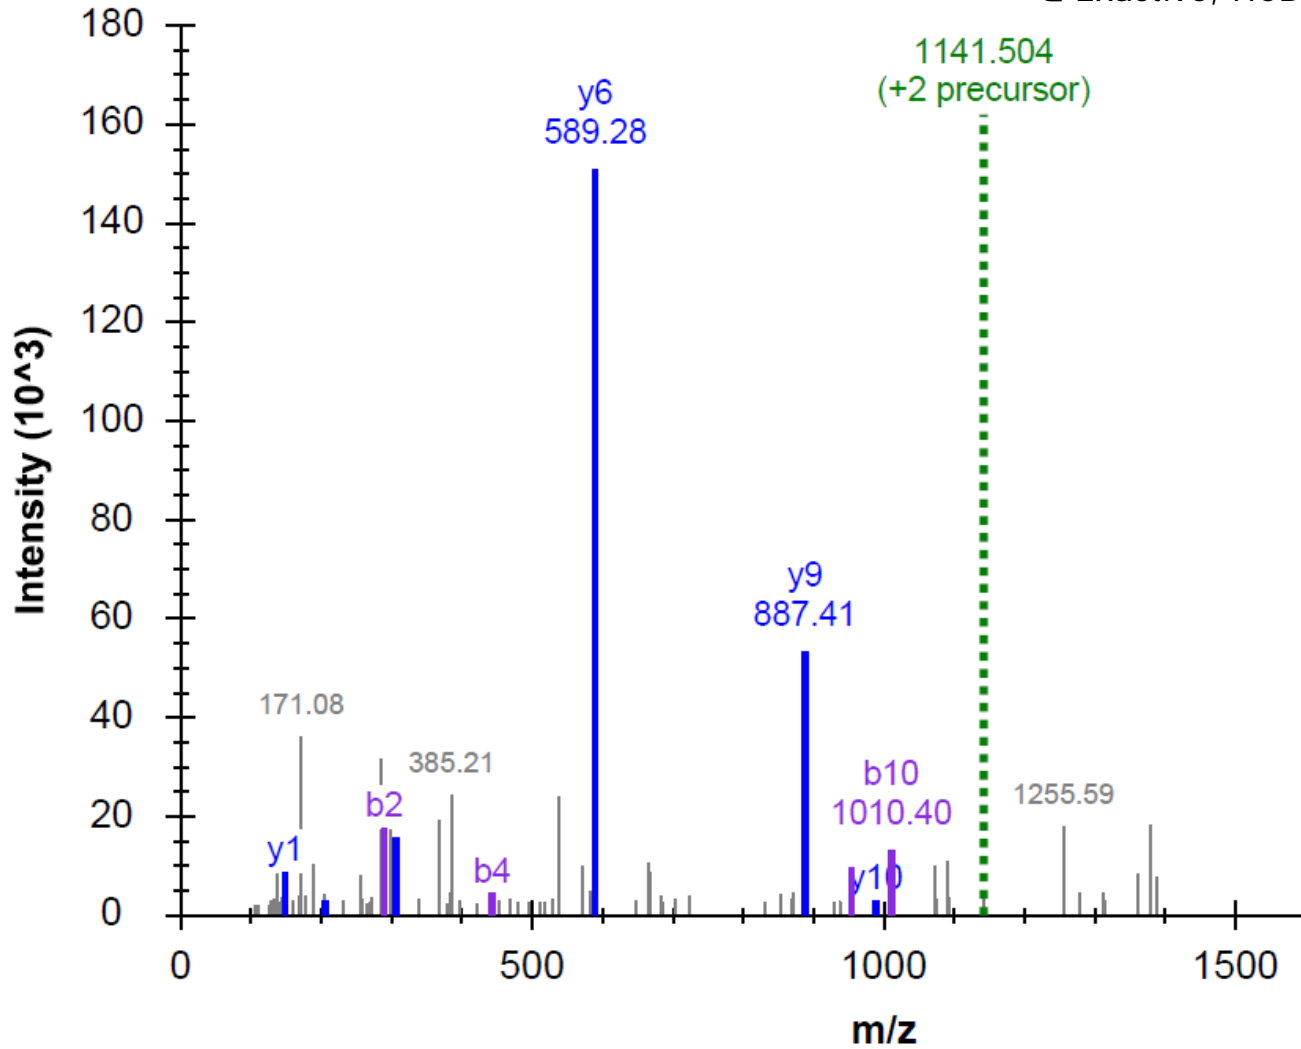

m/z = 767.34 (+3)

PSM showing the identification of 3-Hyp<sup>478</sup>

Mouse col4a1 chain

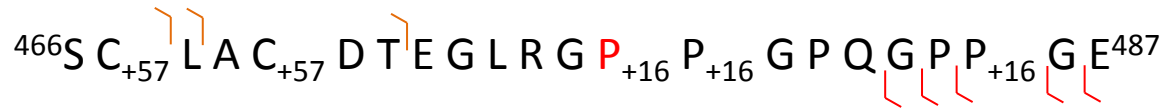

Q Exactive, HCD Fragmentation

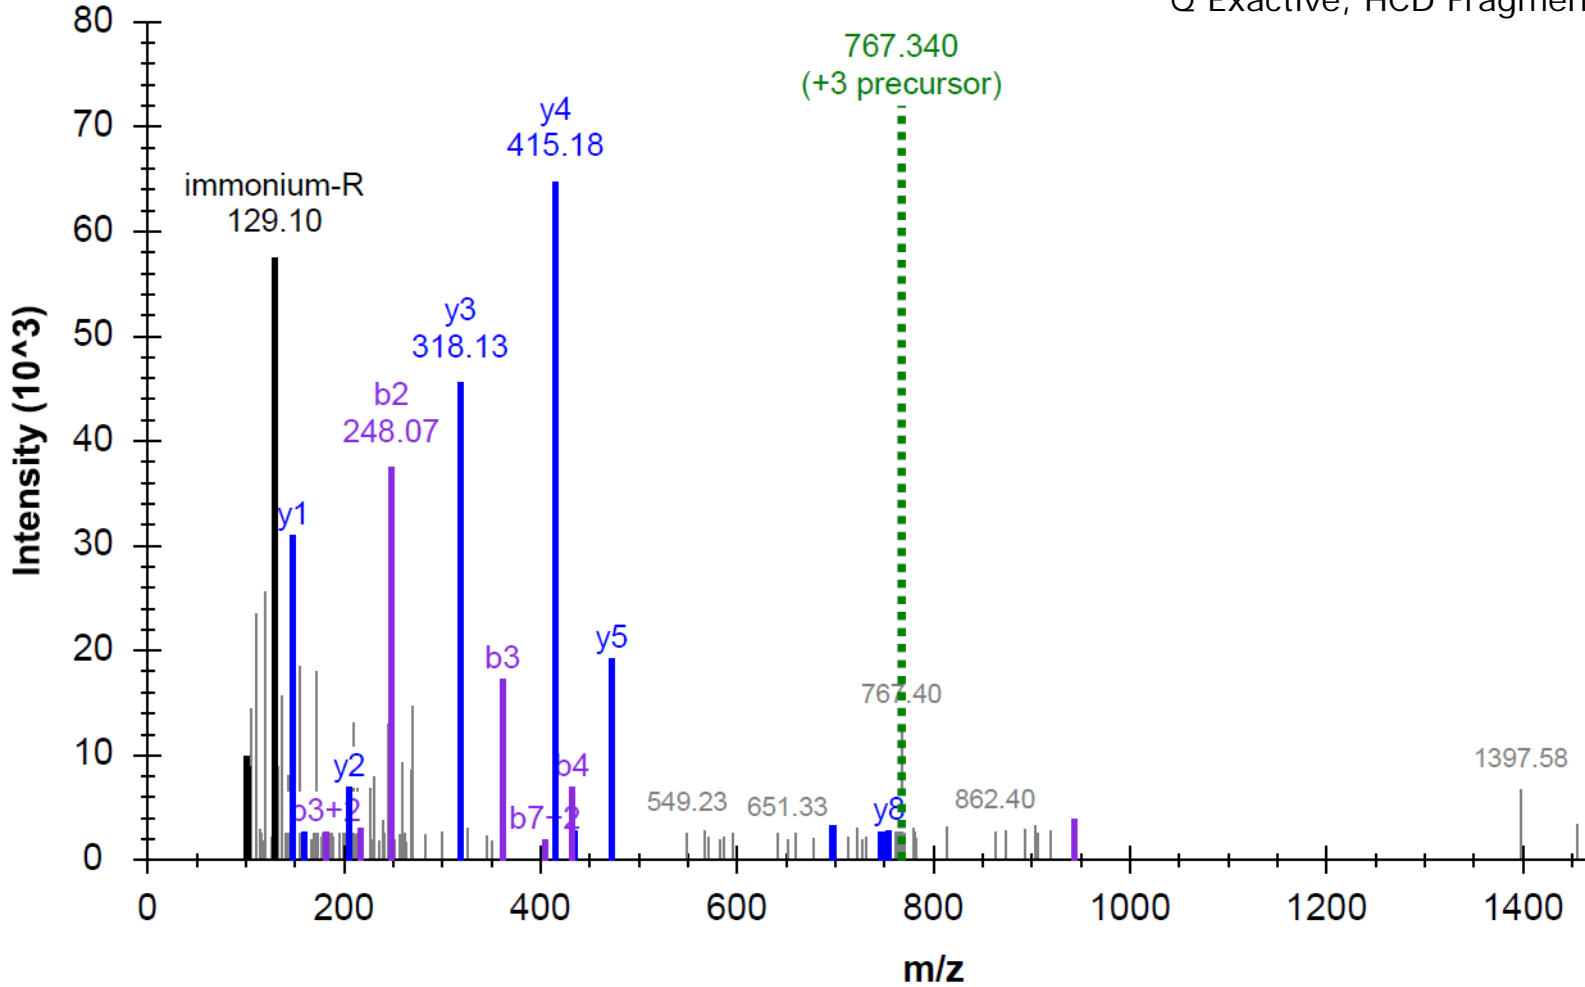

m/z= 682.33 (+2)

PSM showing the identification of HyP<sup>481</sup>

Mouse col4a1 chain

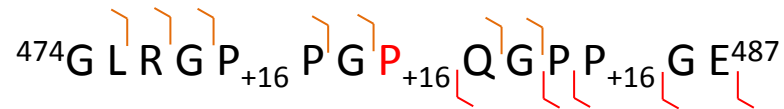

Orbitrap-Velos, CID Fragmentation

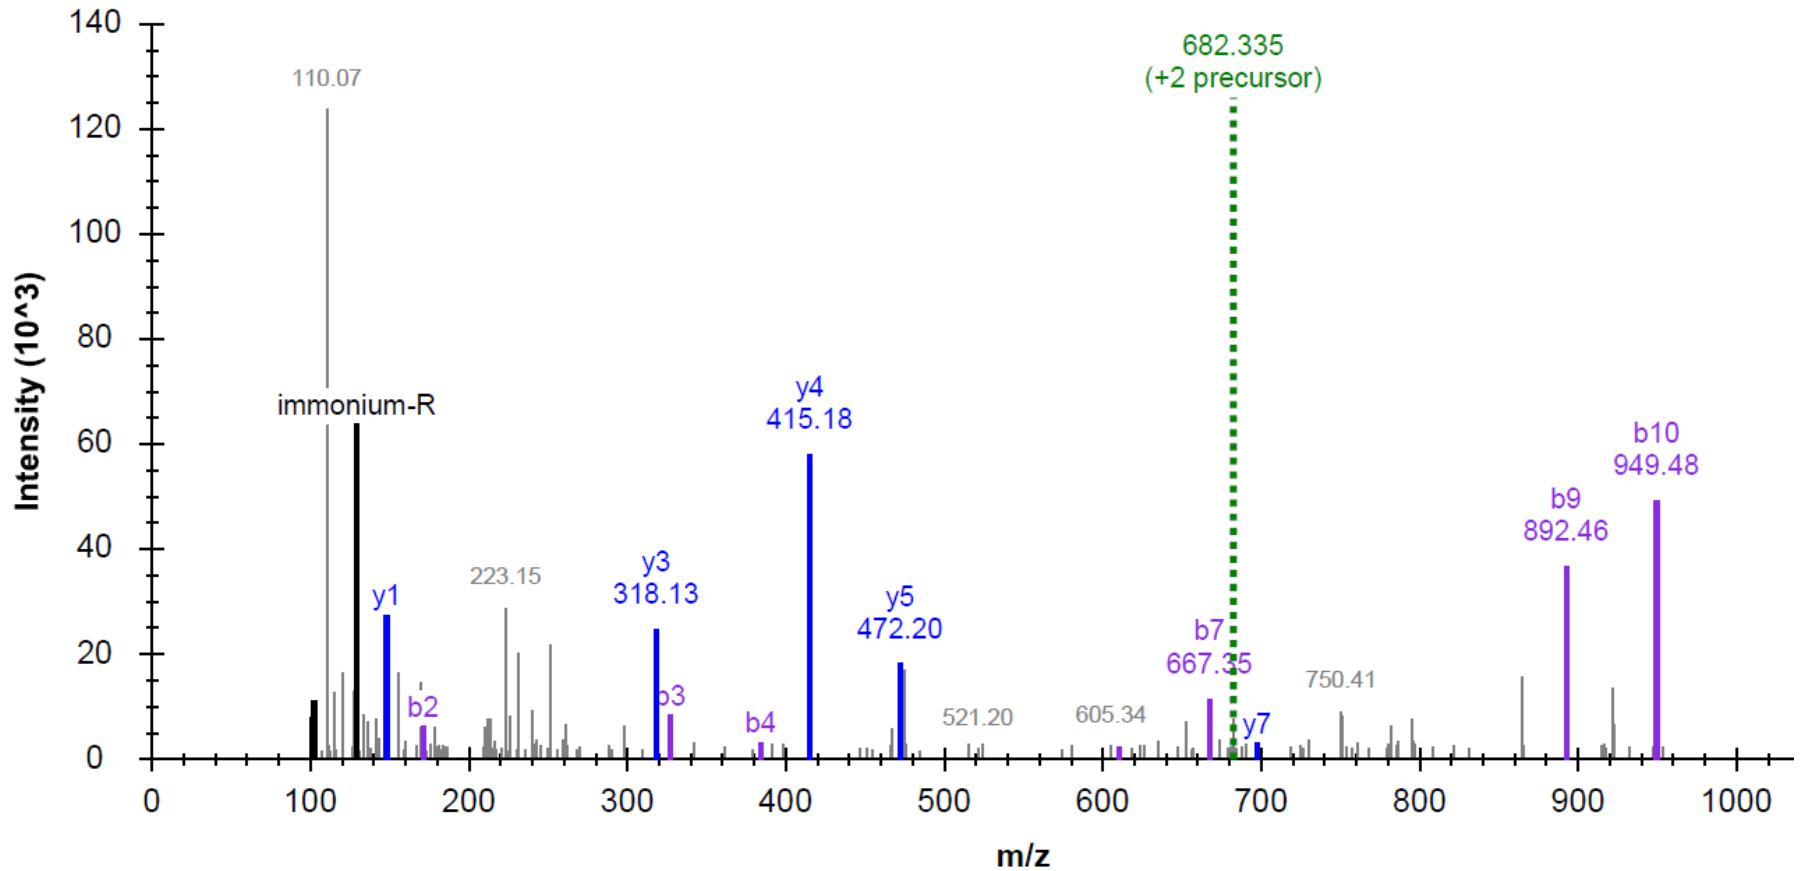

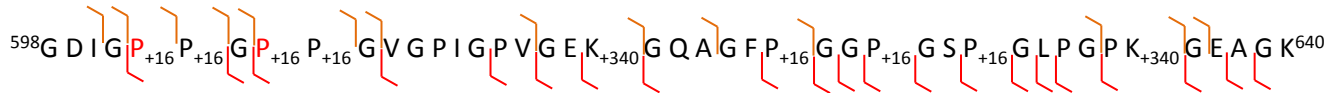

Q Exactive, HCD Fragmentation

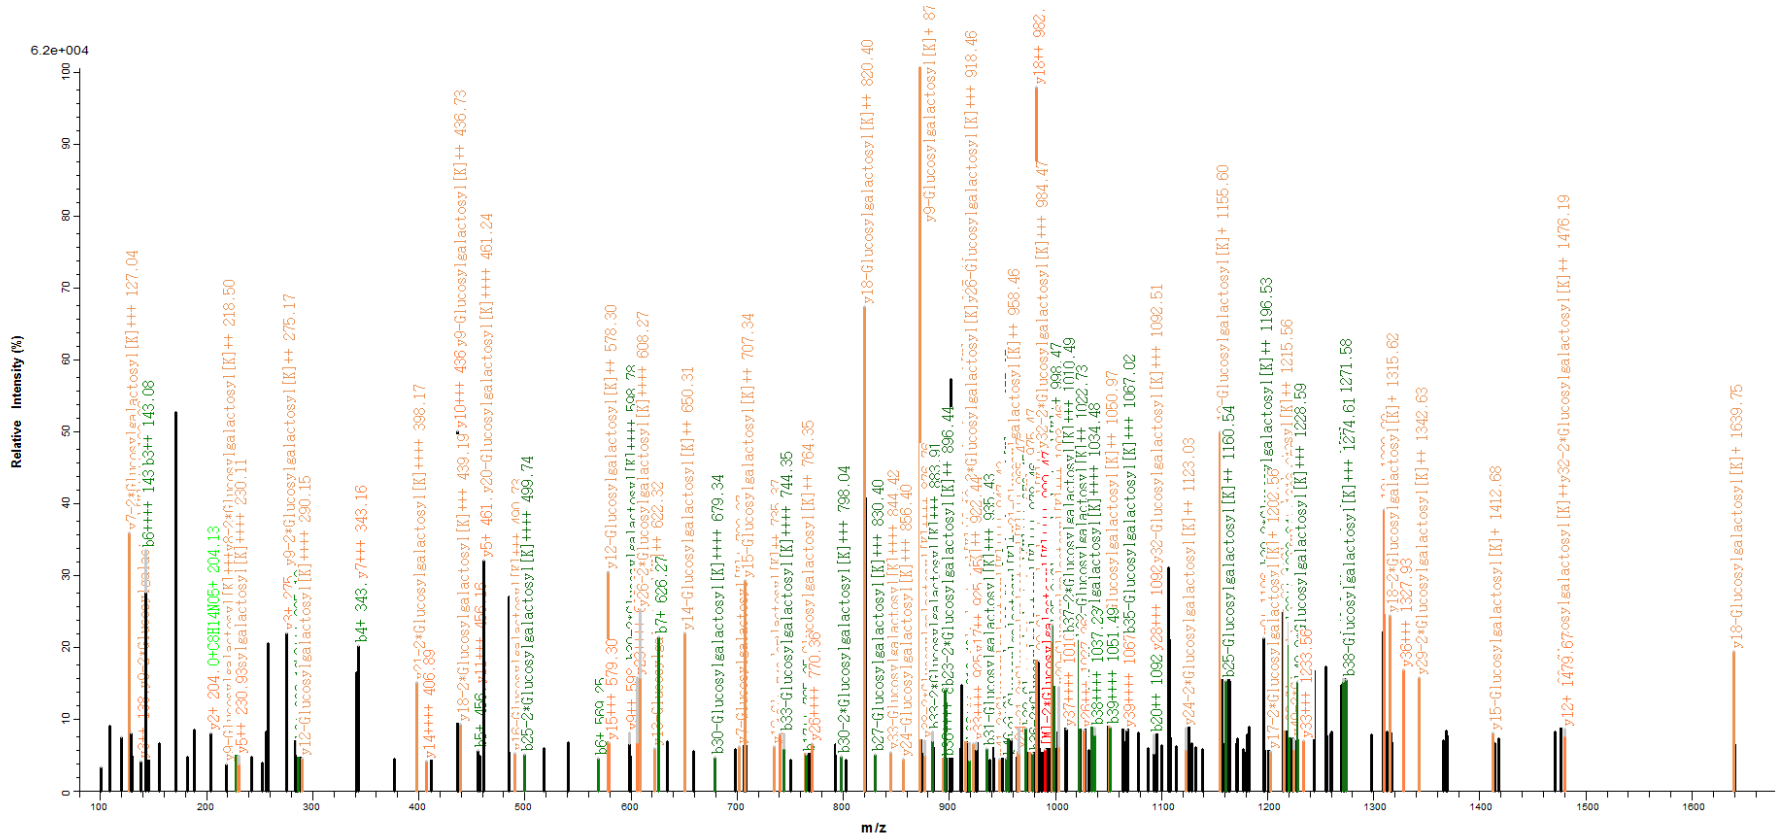

m/z= 830.744 (+3)

PSM showing the identification of 3-HyP<sup>647</sup>

Mouse col4a1 chain

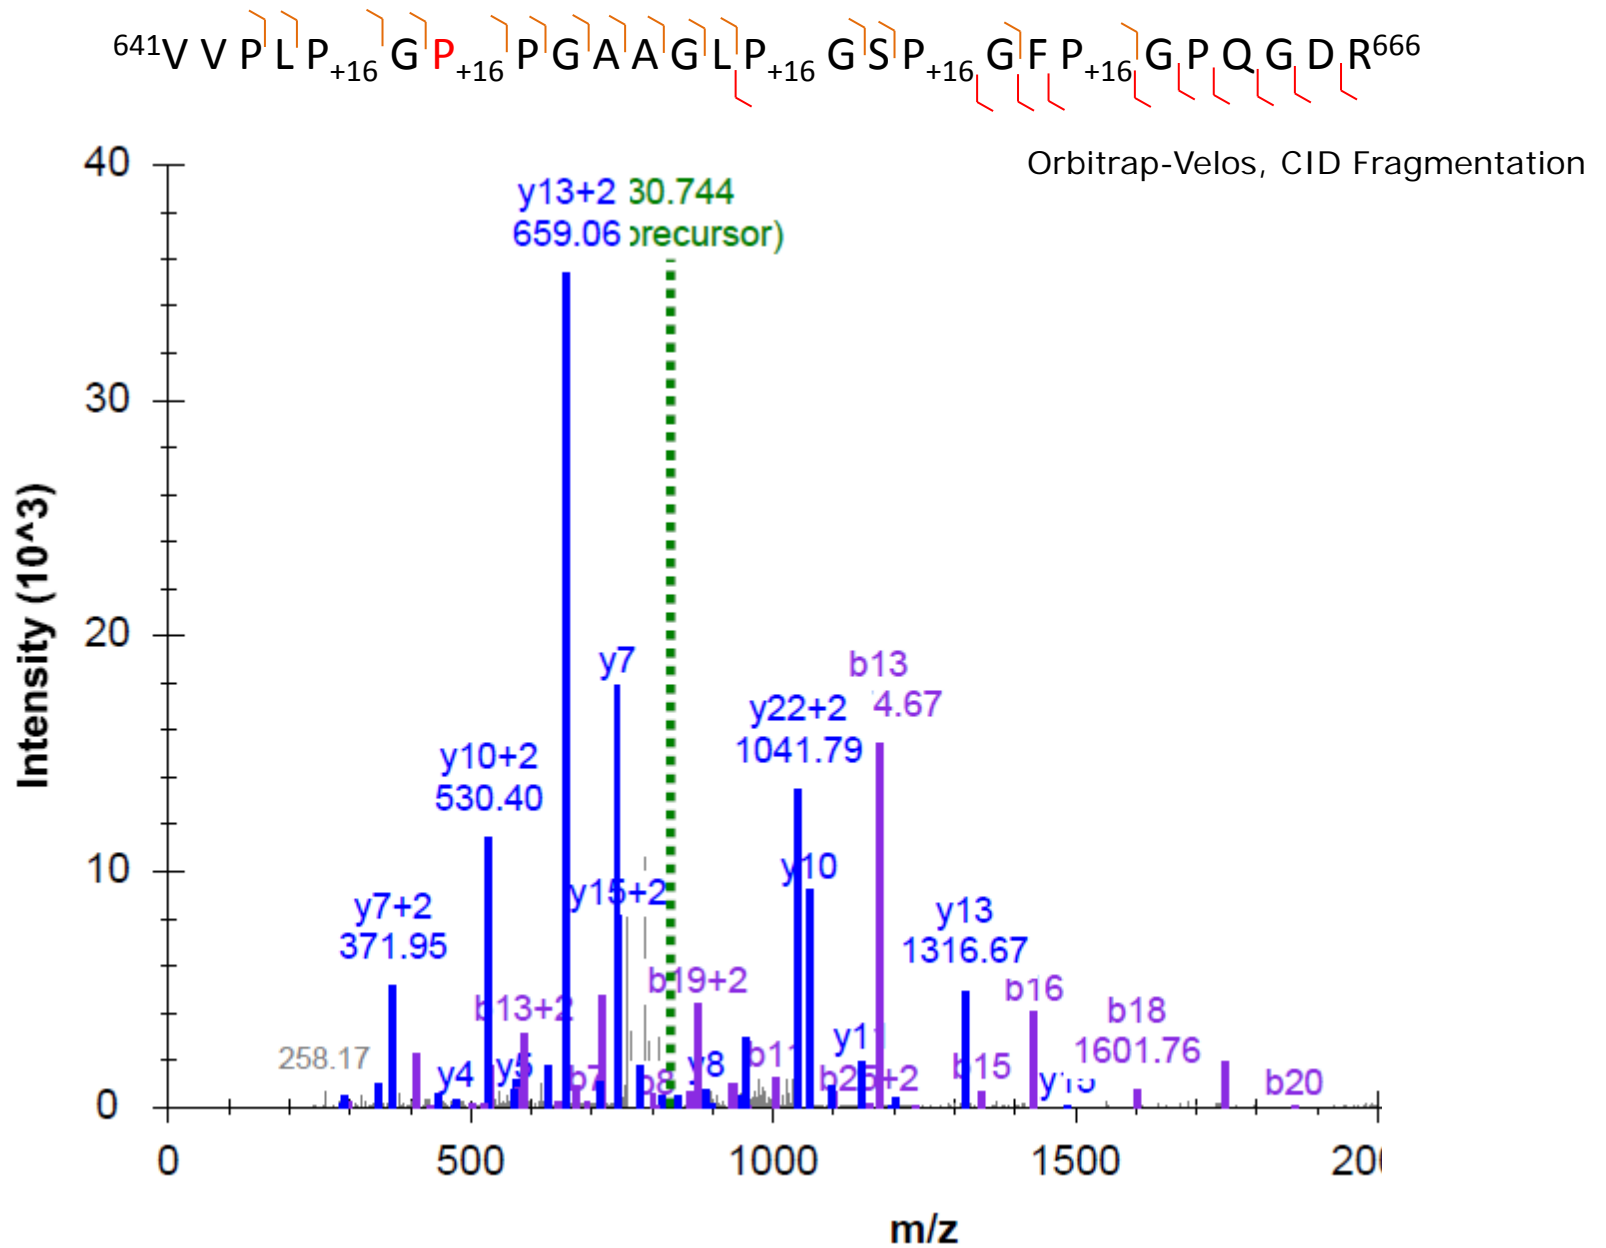



m/z= 1038.1483 (+3)

PSM showing the identification of 3-Hyp<sup>1424</sup>, 3-Hyp<sup>1436</sup>

Mouse col4a1 chain

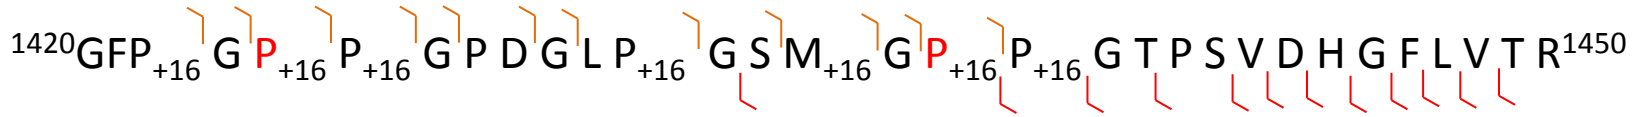

Q Exactive, HCD Fragmentation

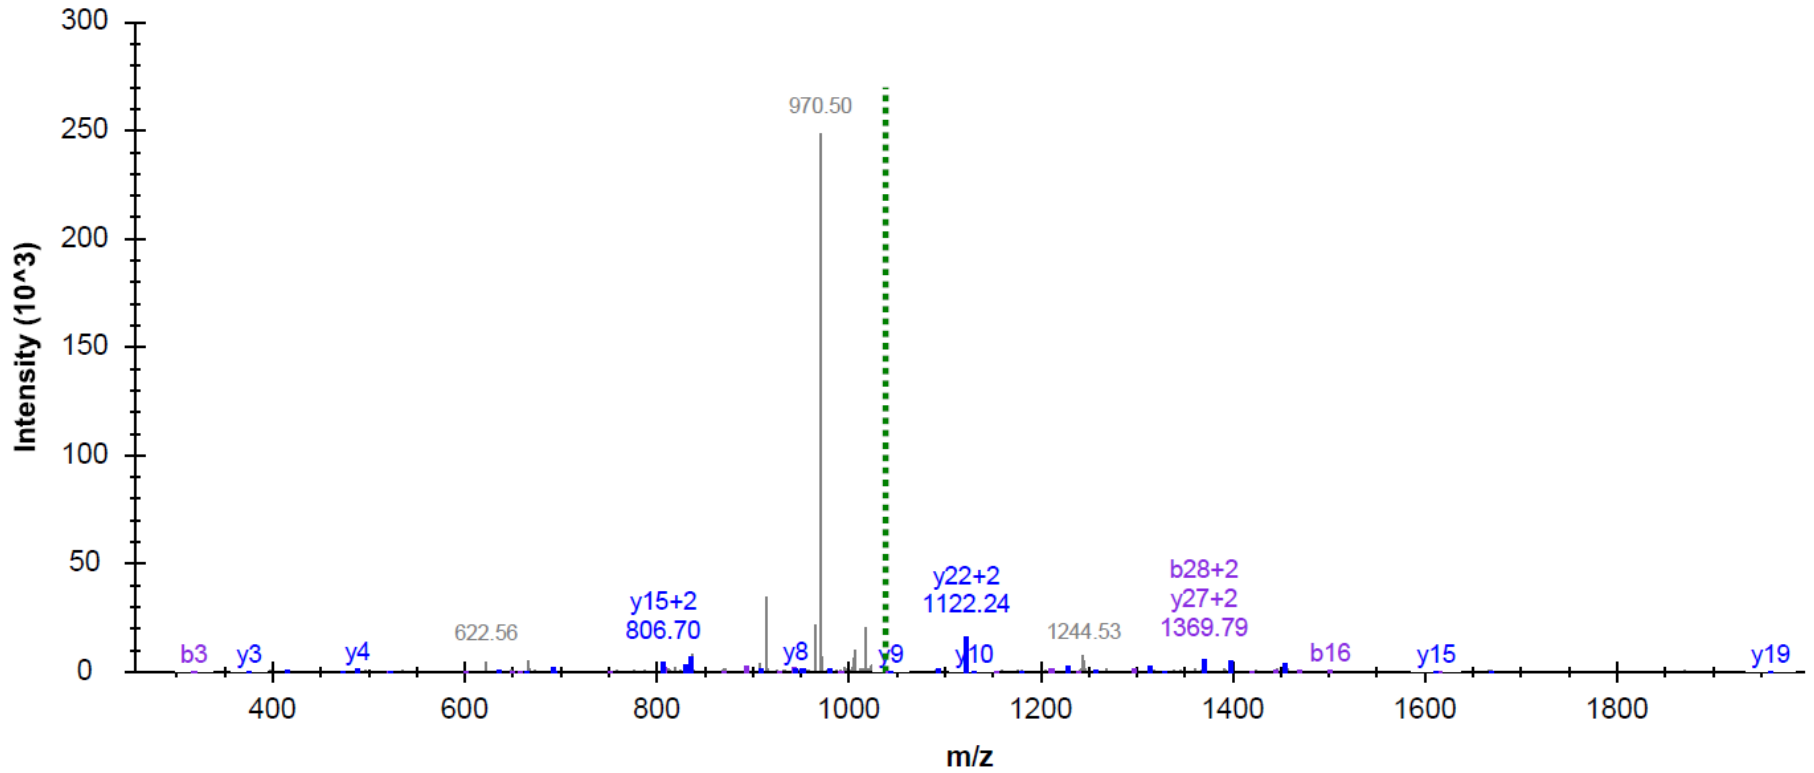

**Supporting figure S3:** Peptide spectrum matches (PSMs) of 39 O-glycosylation, 14 3-hydroxyproline and 3 hydroxyproline sites at Xaa position of Gly-HyP-Gln motif in human col4a1 chain. PSMs were annotated using pLABEL<sup>1</sup> or IDPicker utility software Ion Matcher<sup>2</sup>.

m/z = 1200.8137; charge = +4

PSM showing the identification of Glucosylgalactosyl-HyK<sup>78,90</sup>

Human col4a1 chain

52G L P<sub>+16</sub> G L Q G V I G F P<sub>+16</sub> G M Q G P E G P Q G P P<sub>+16</sub> G Q K<sub>+340</sub> G D T G E P<sub>+16</sub> G L P<sub>+16</sub> G T K<sub>+340</sub> G T R<sup>93</sup>

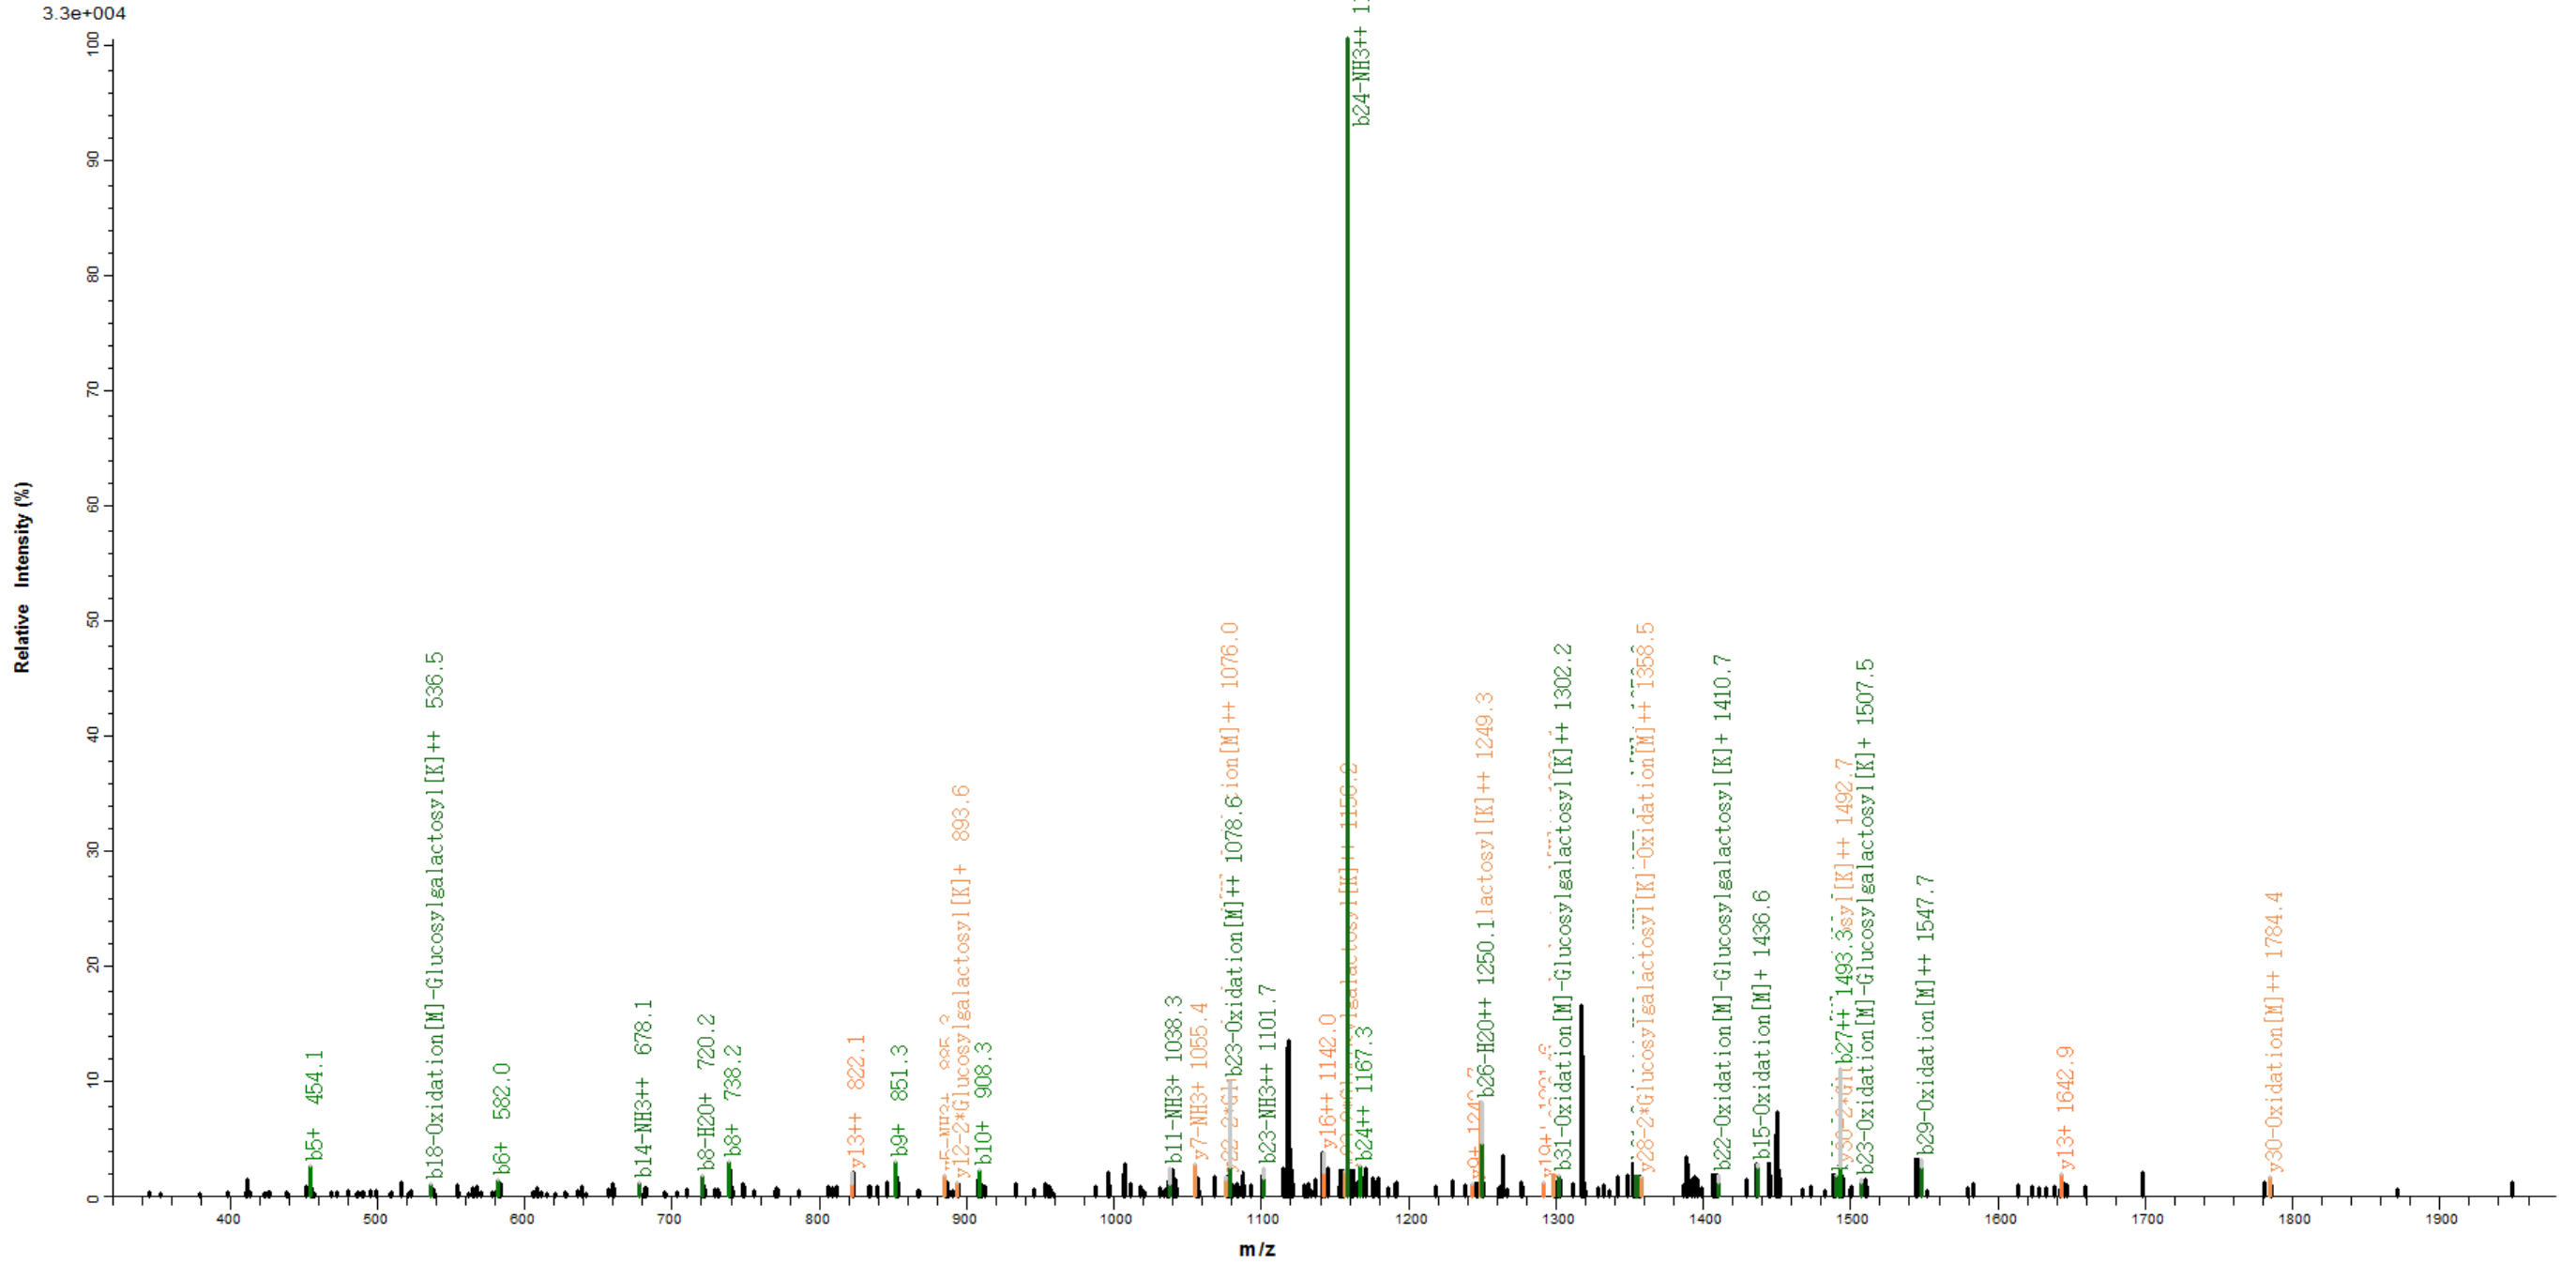

m/z = 957.6457; charge = +5

PSM showing the identification of Galactosyl-HyK<sup>78,90</sup>

Human col4a1 chain

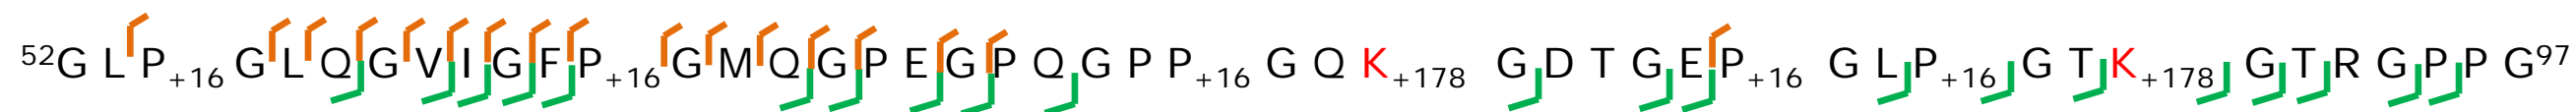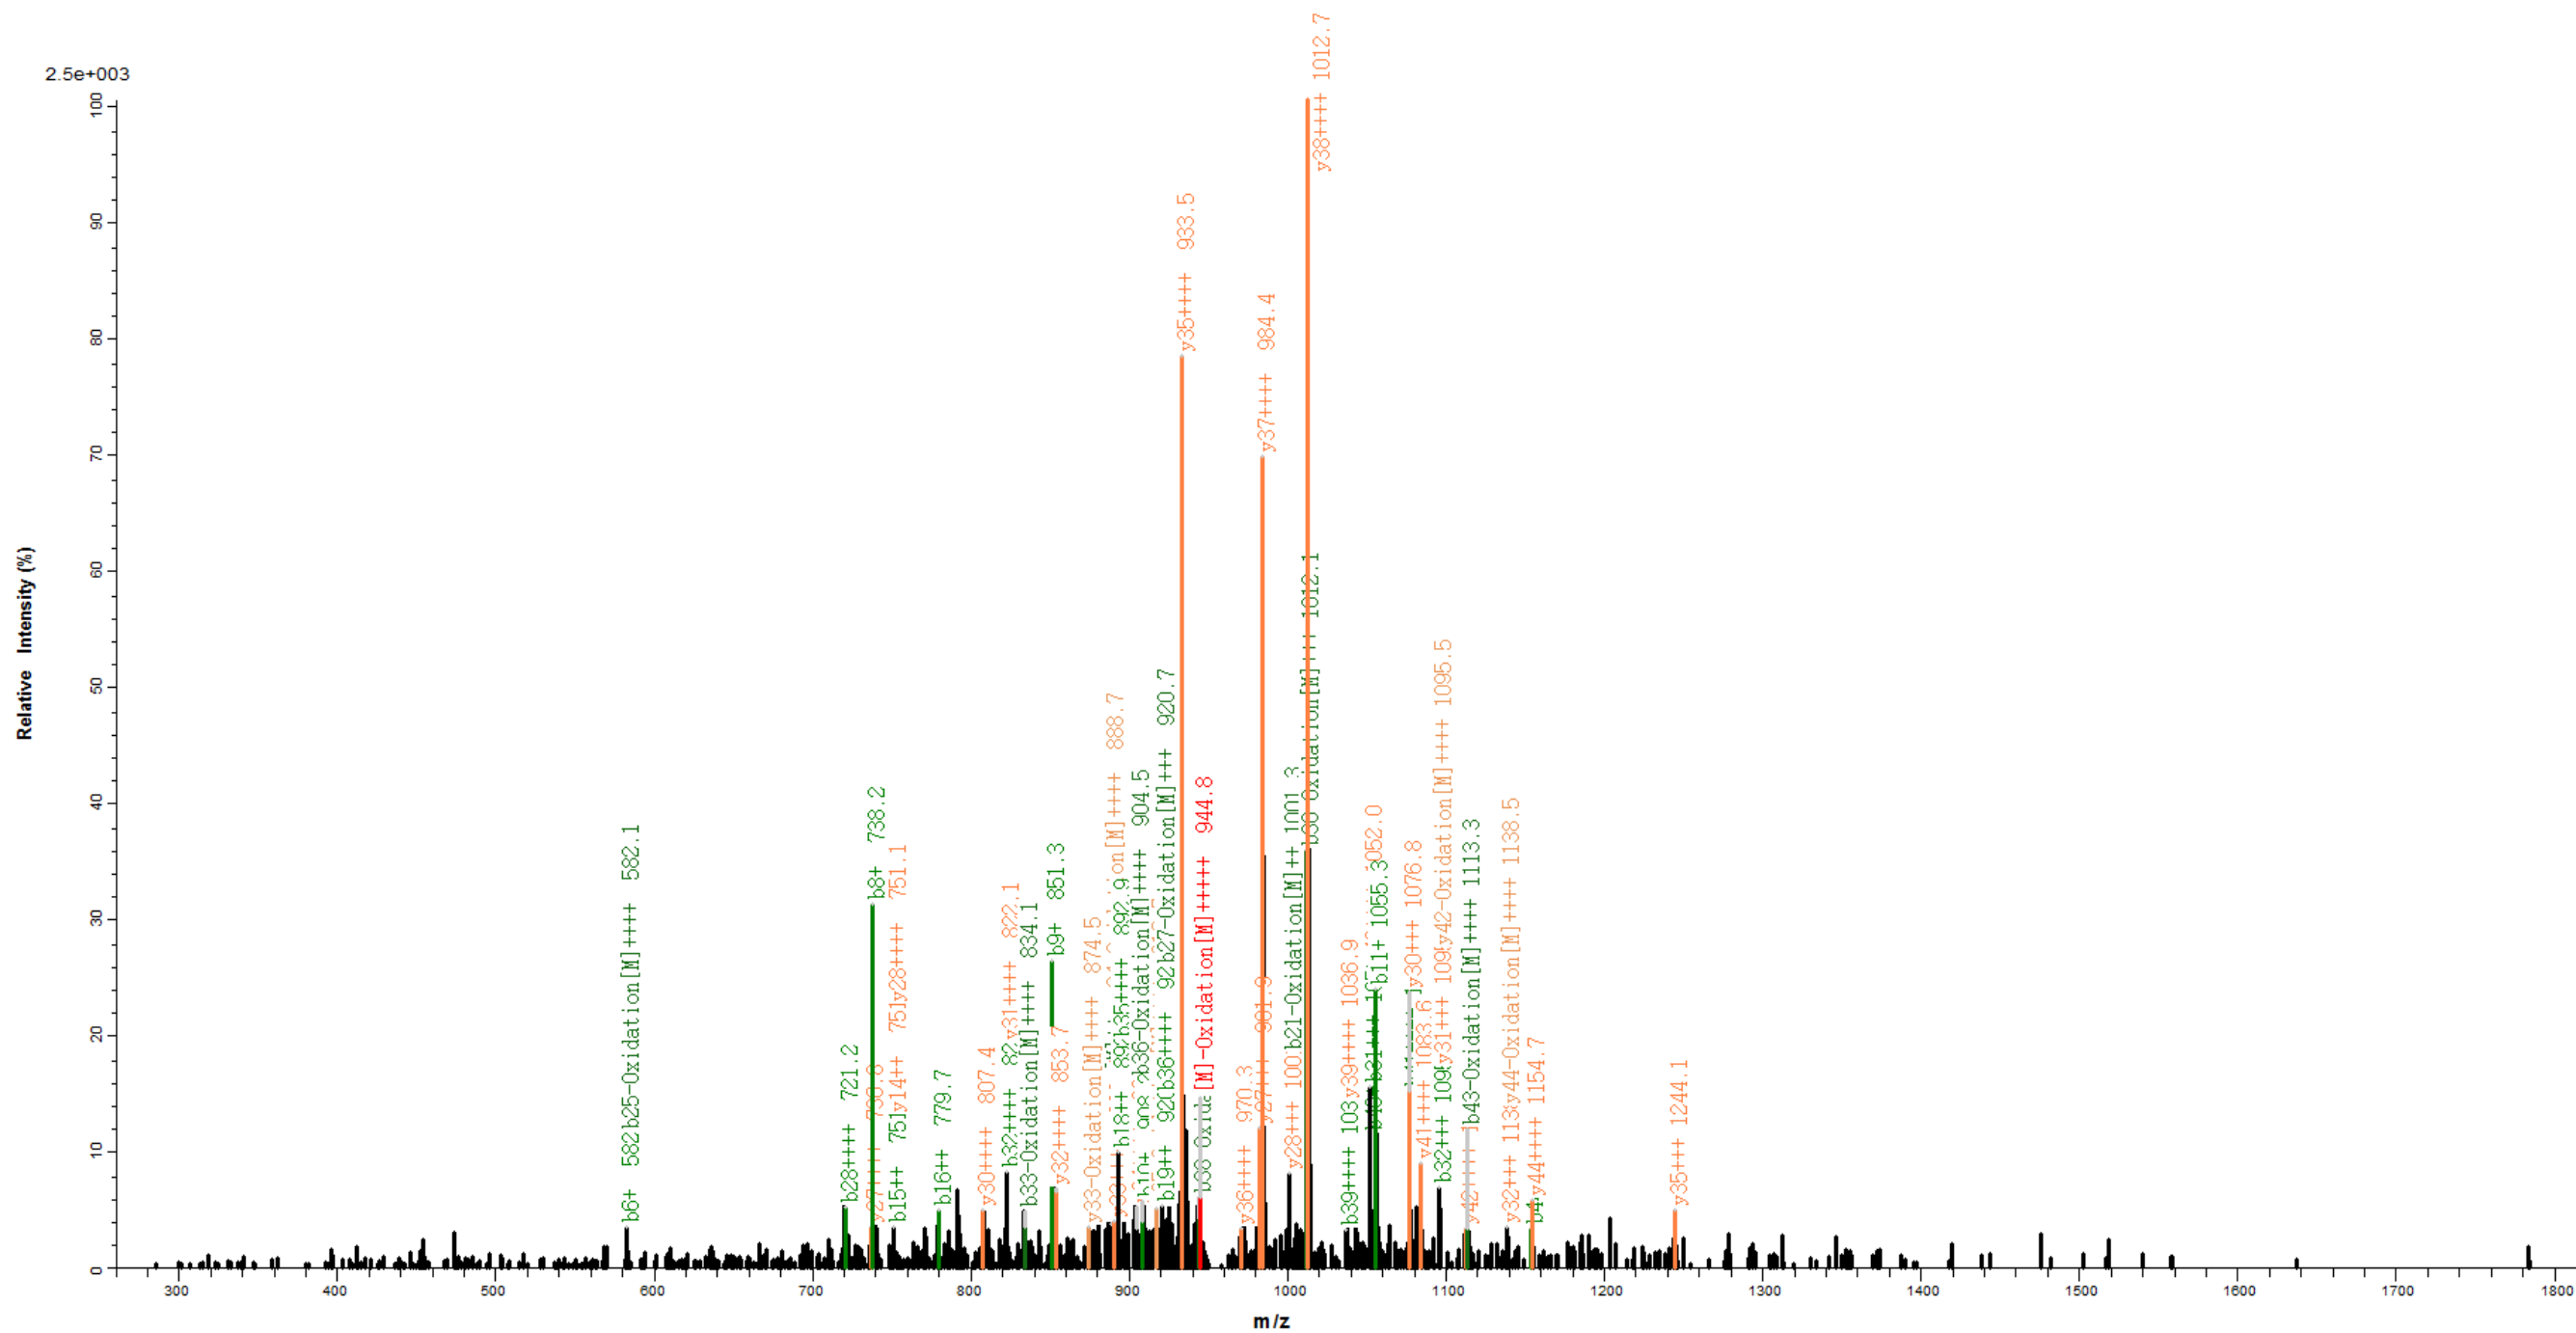

m/z = 1001.8837; charge = +5

PSM showing the identification of Glucosylgalactosyl-HyK<sup>156</sup>

Human col4a1 chain

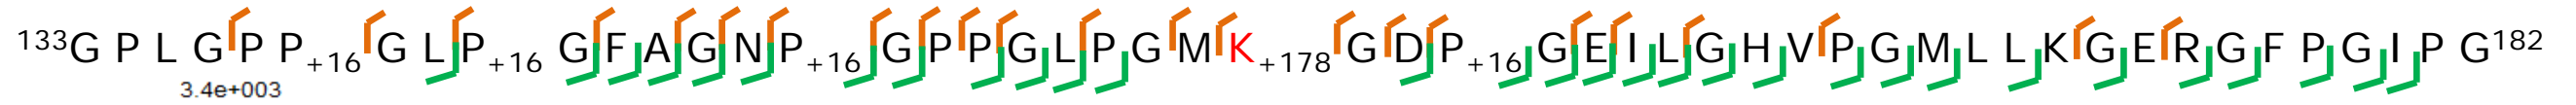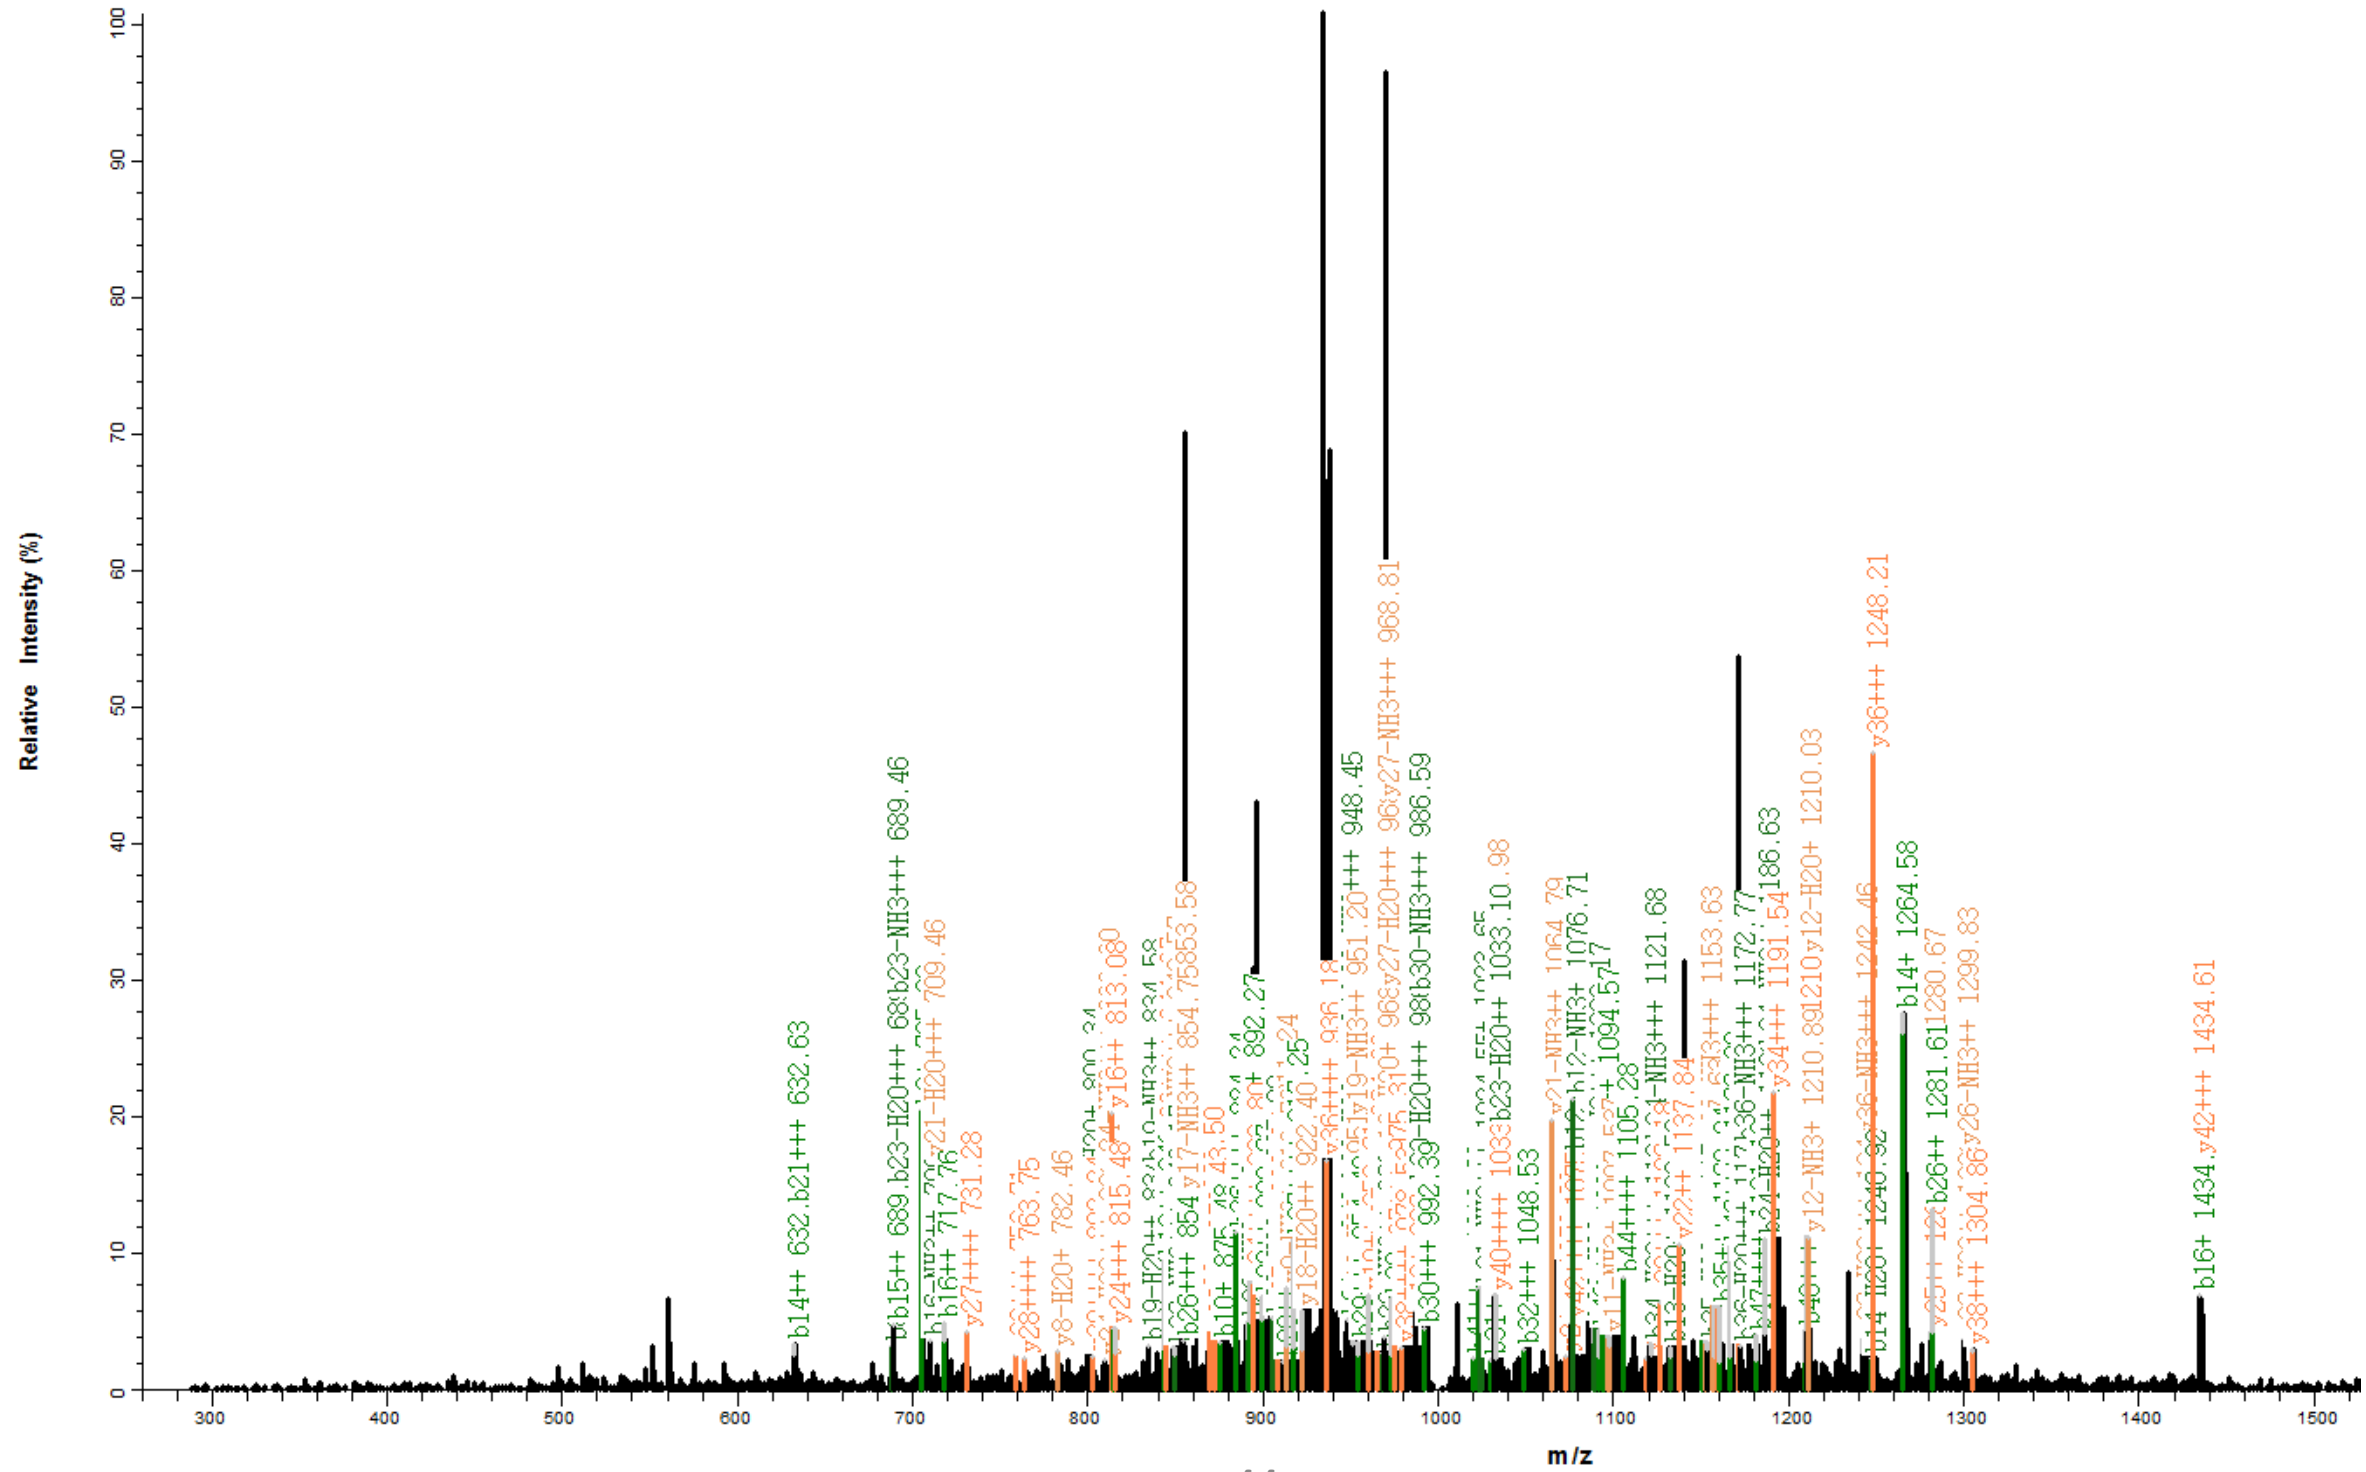

m/z = 775.5952; charge = +4

PSM showing the identification of Glucosylgalactosyl-HyK<sup>295,298</sup>

Human col4a1 chain

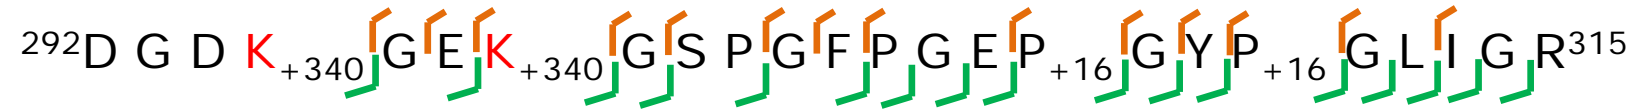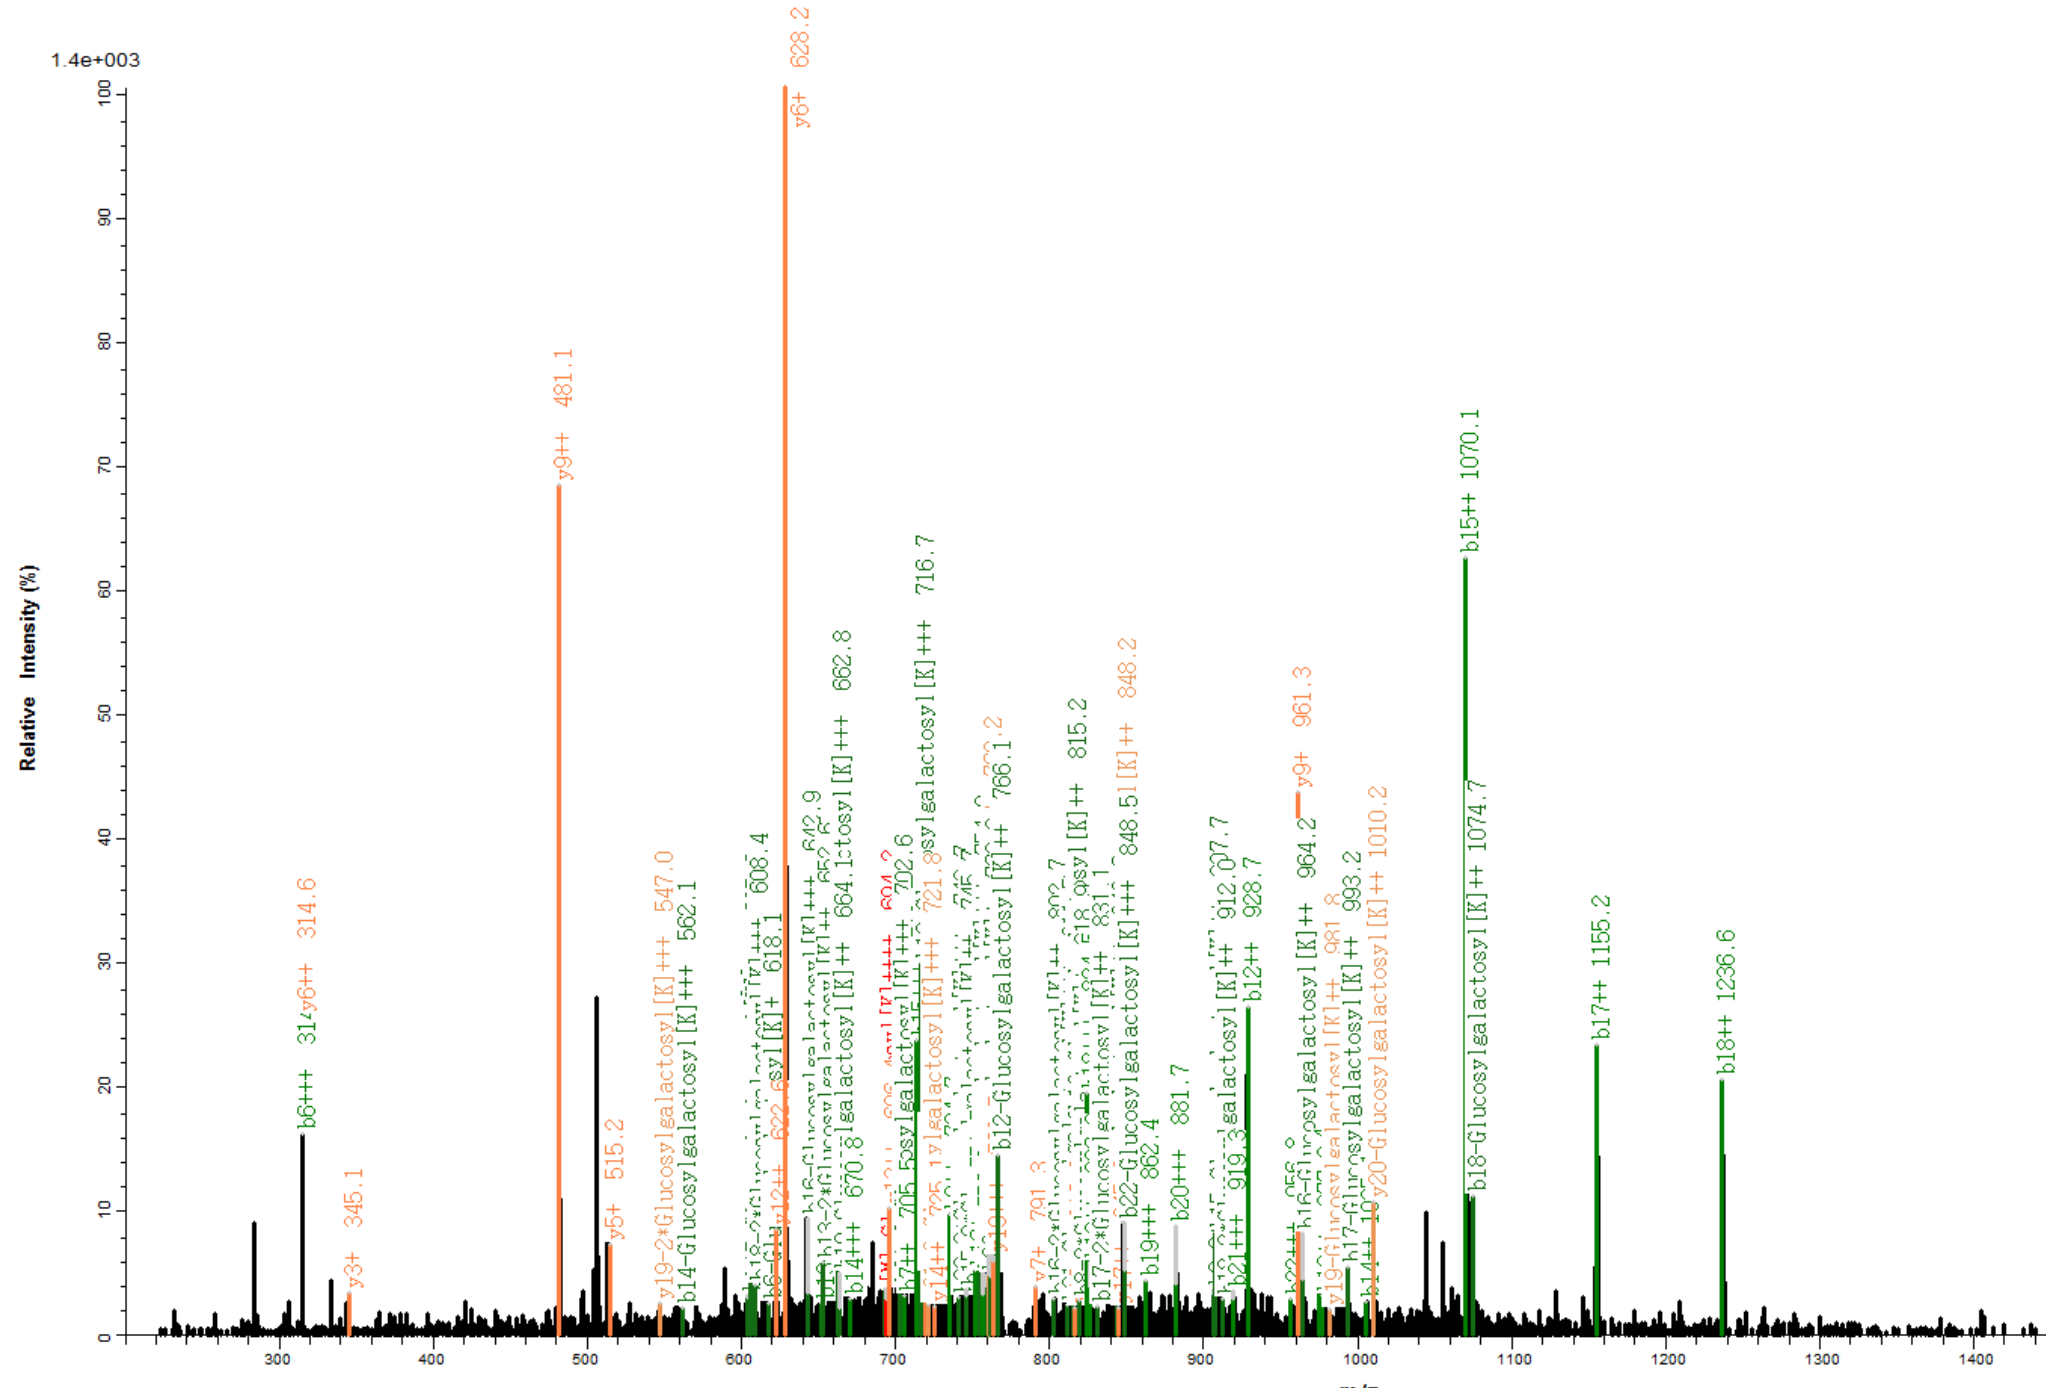

m/z = 920.4349; charge = +4

PSM showing the identification of Glucosylgalactosyl-HyK<sup>321,343</sup>

Human col4a1 chain

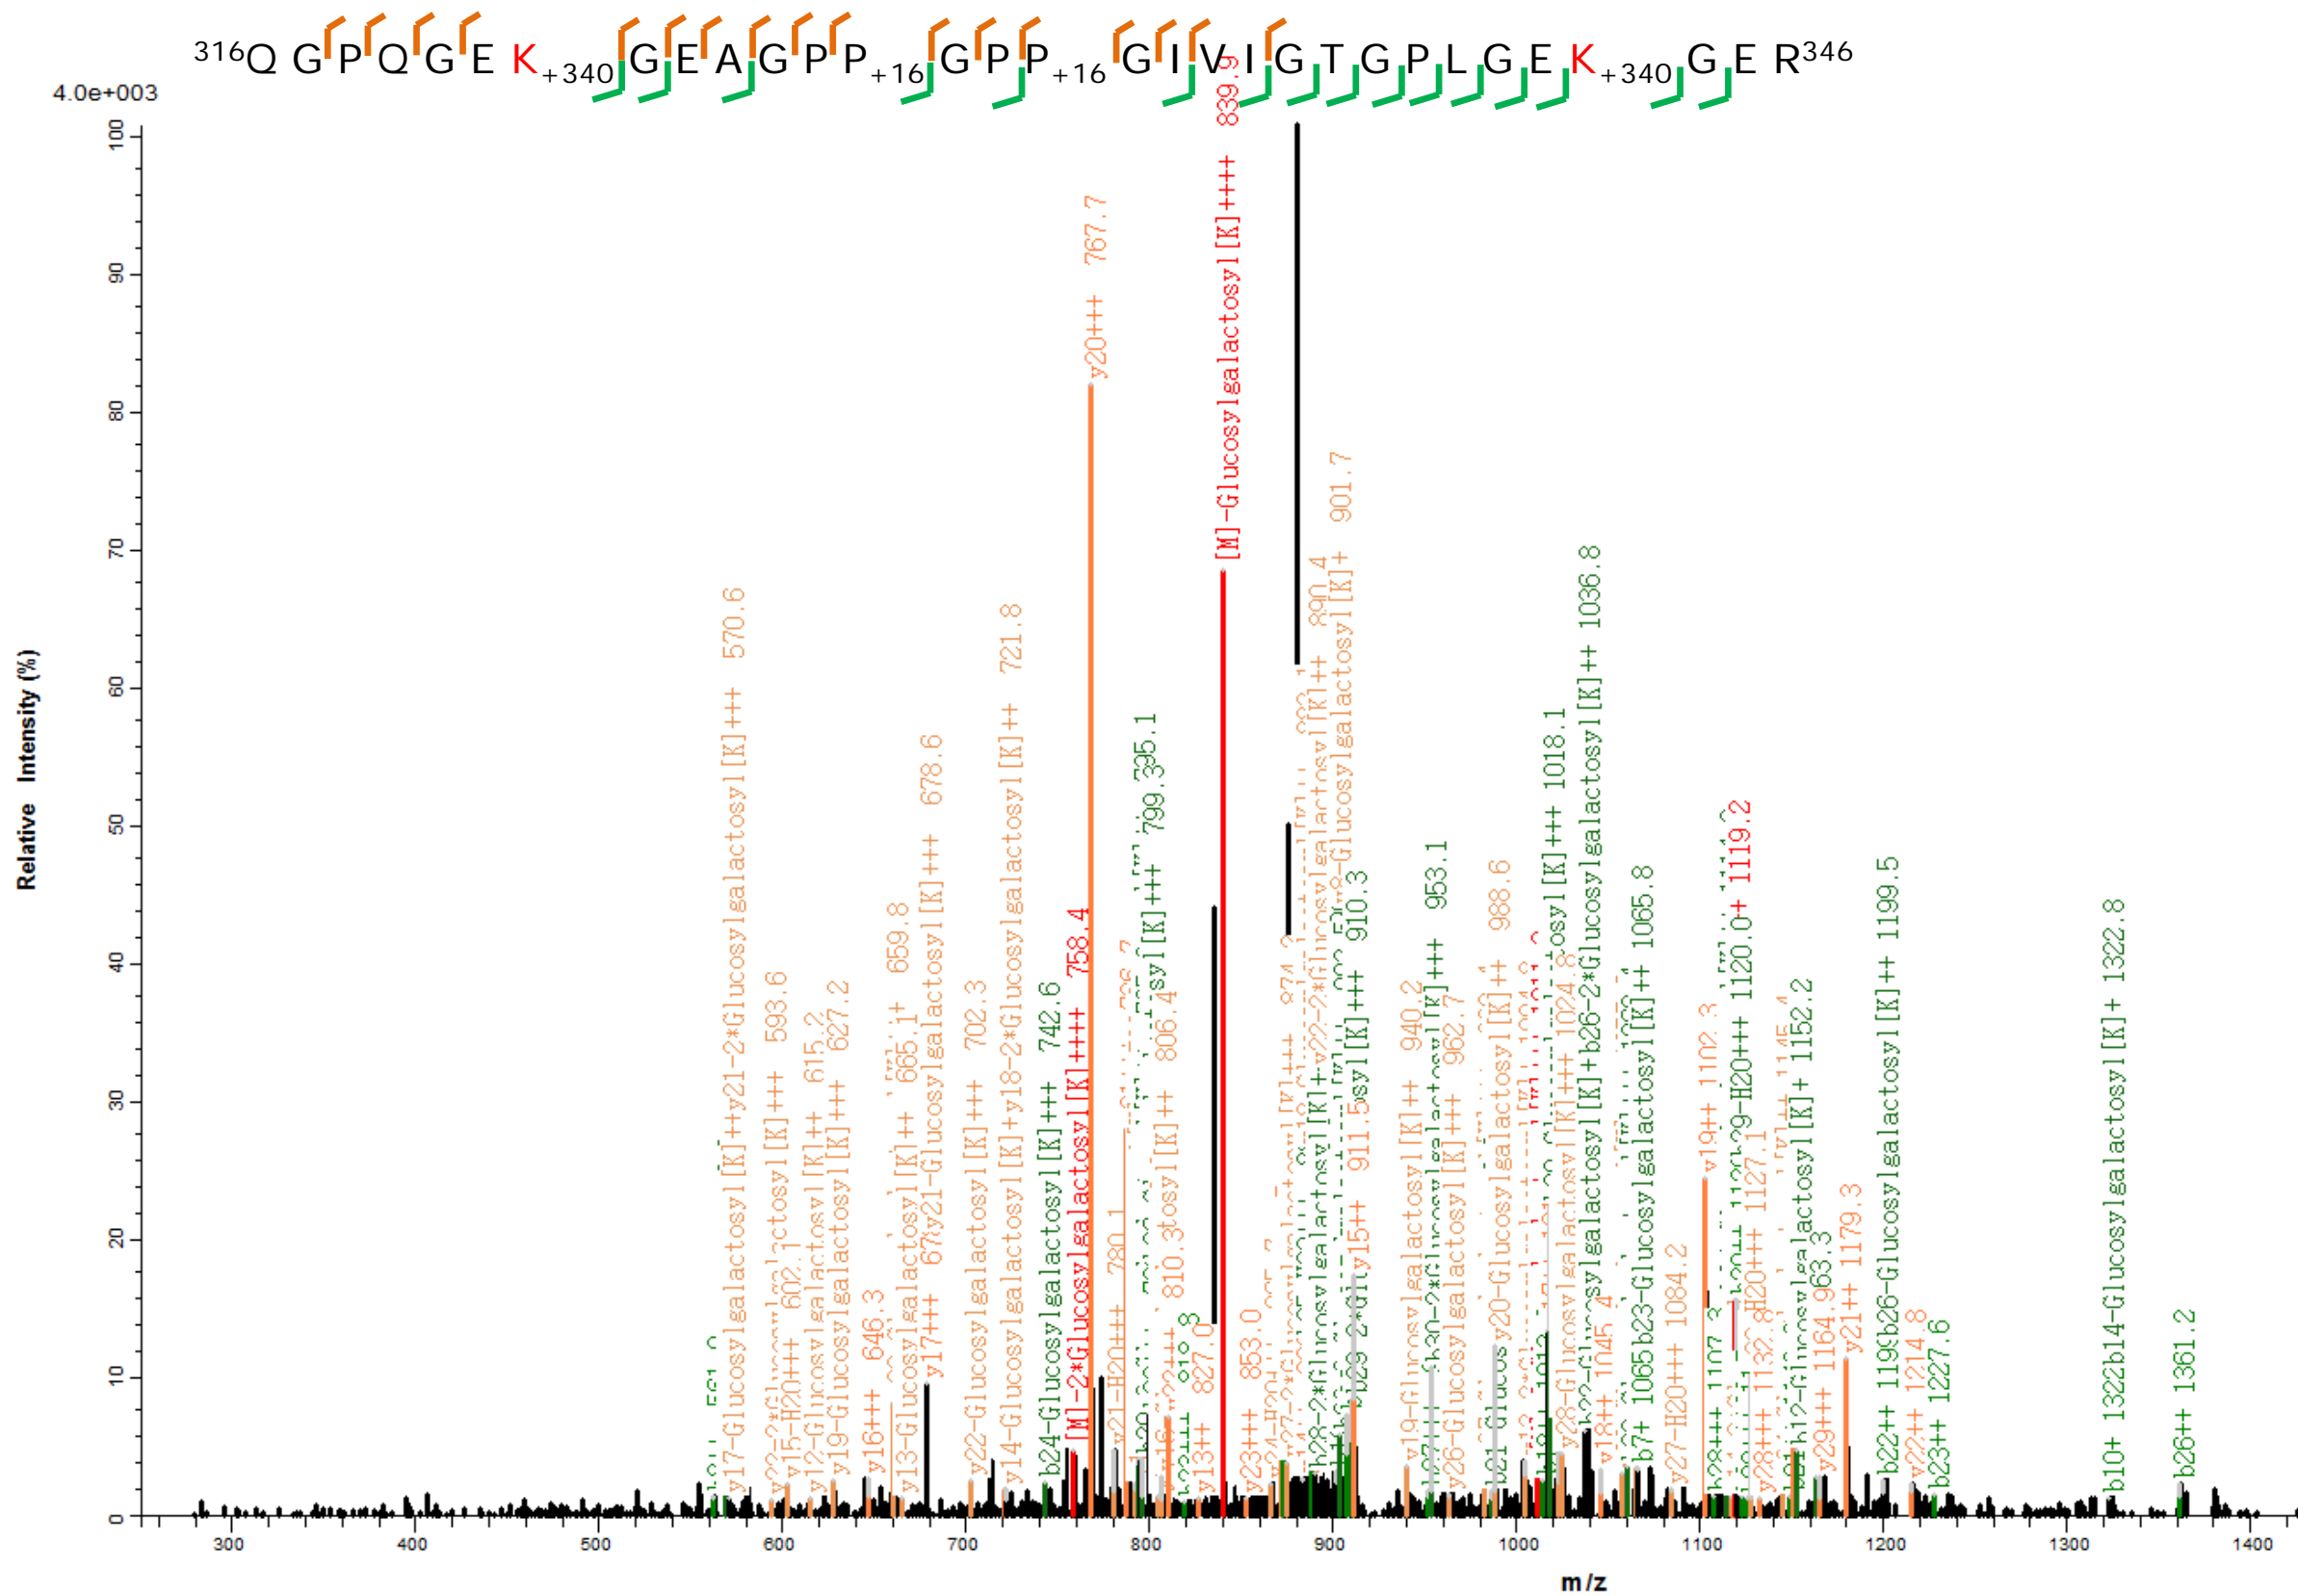

m/z = 1247.923; charge = +3

PSM showing the identification of Glucosylgalactosyl-HyK<sup>361</sup>

Human col4a1 chain

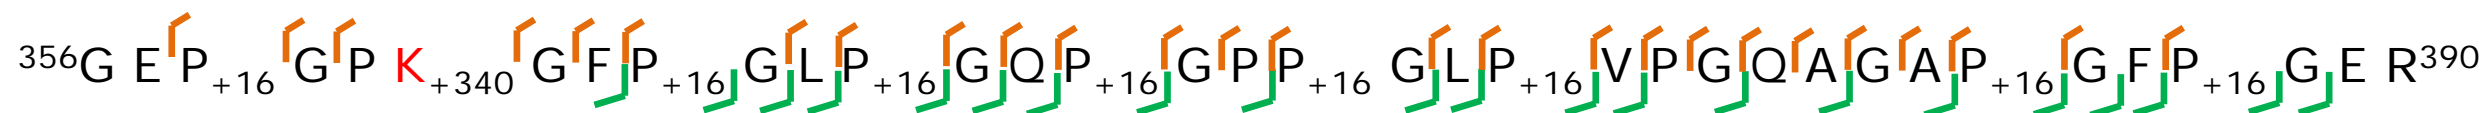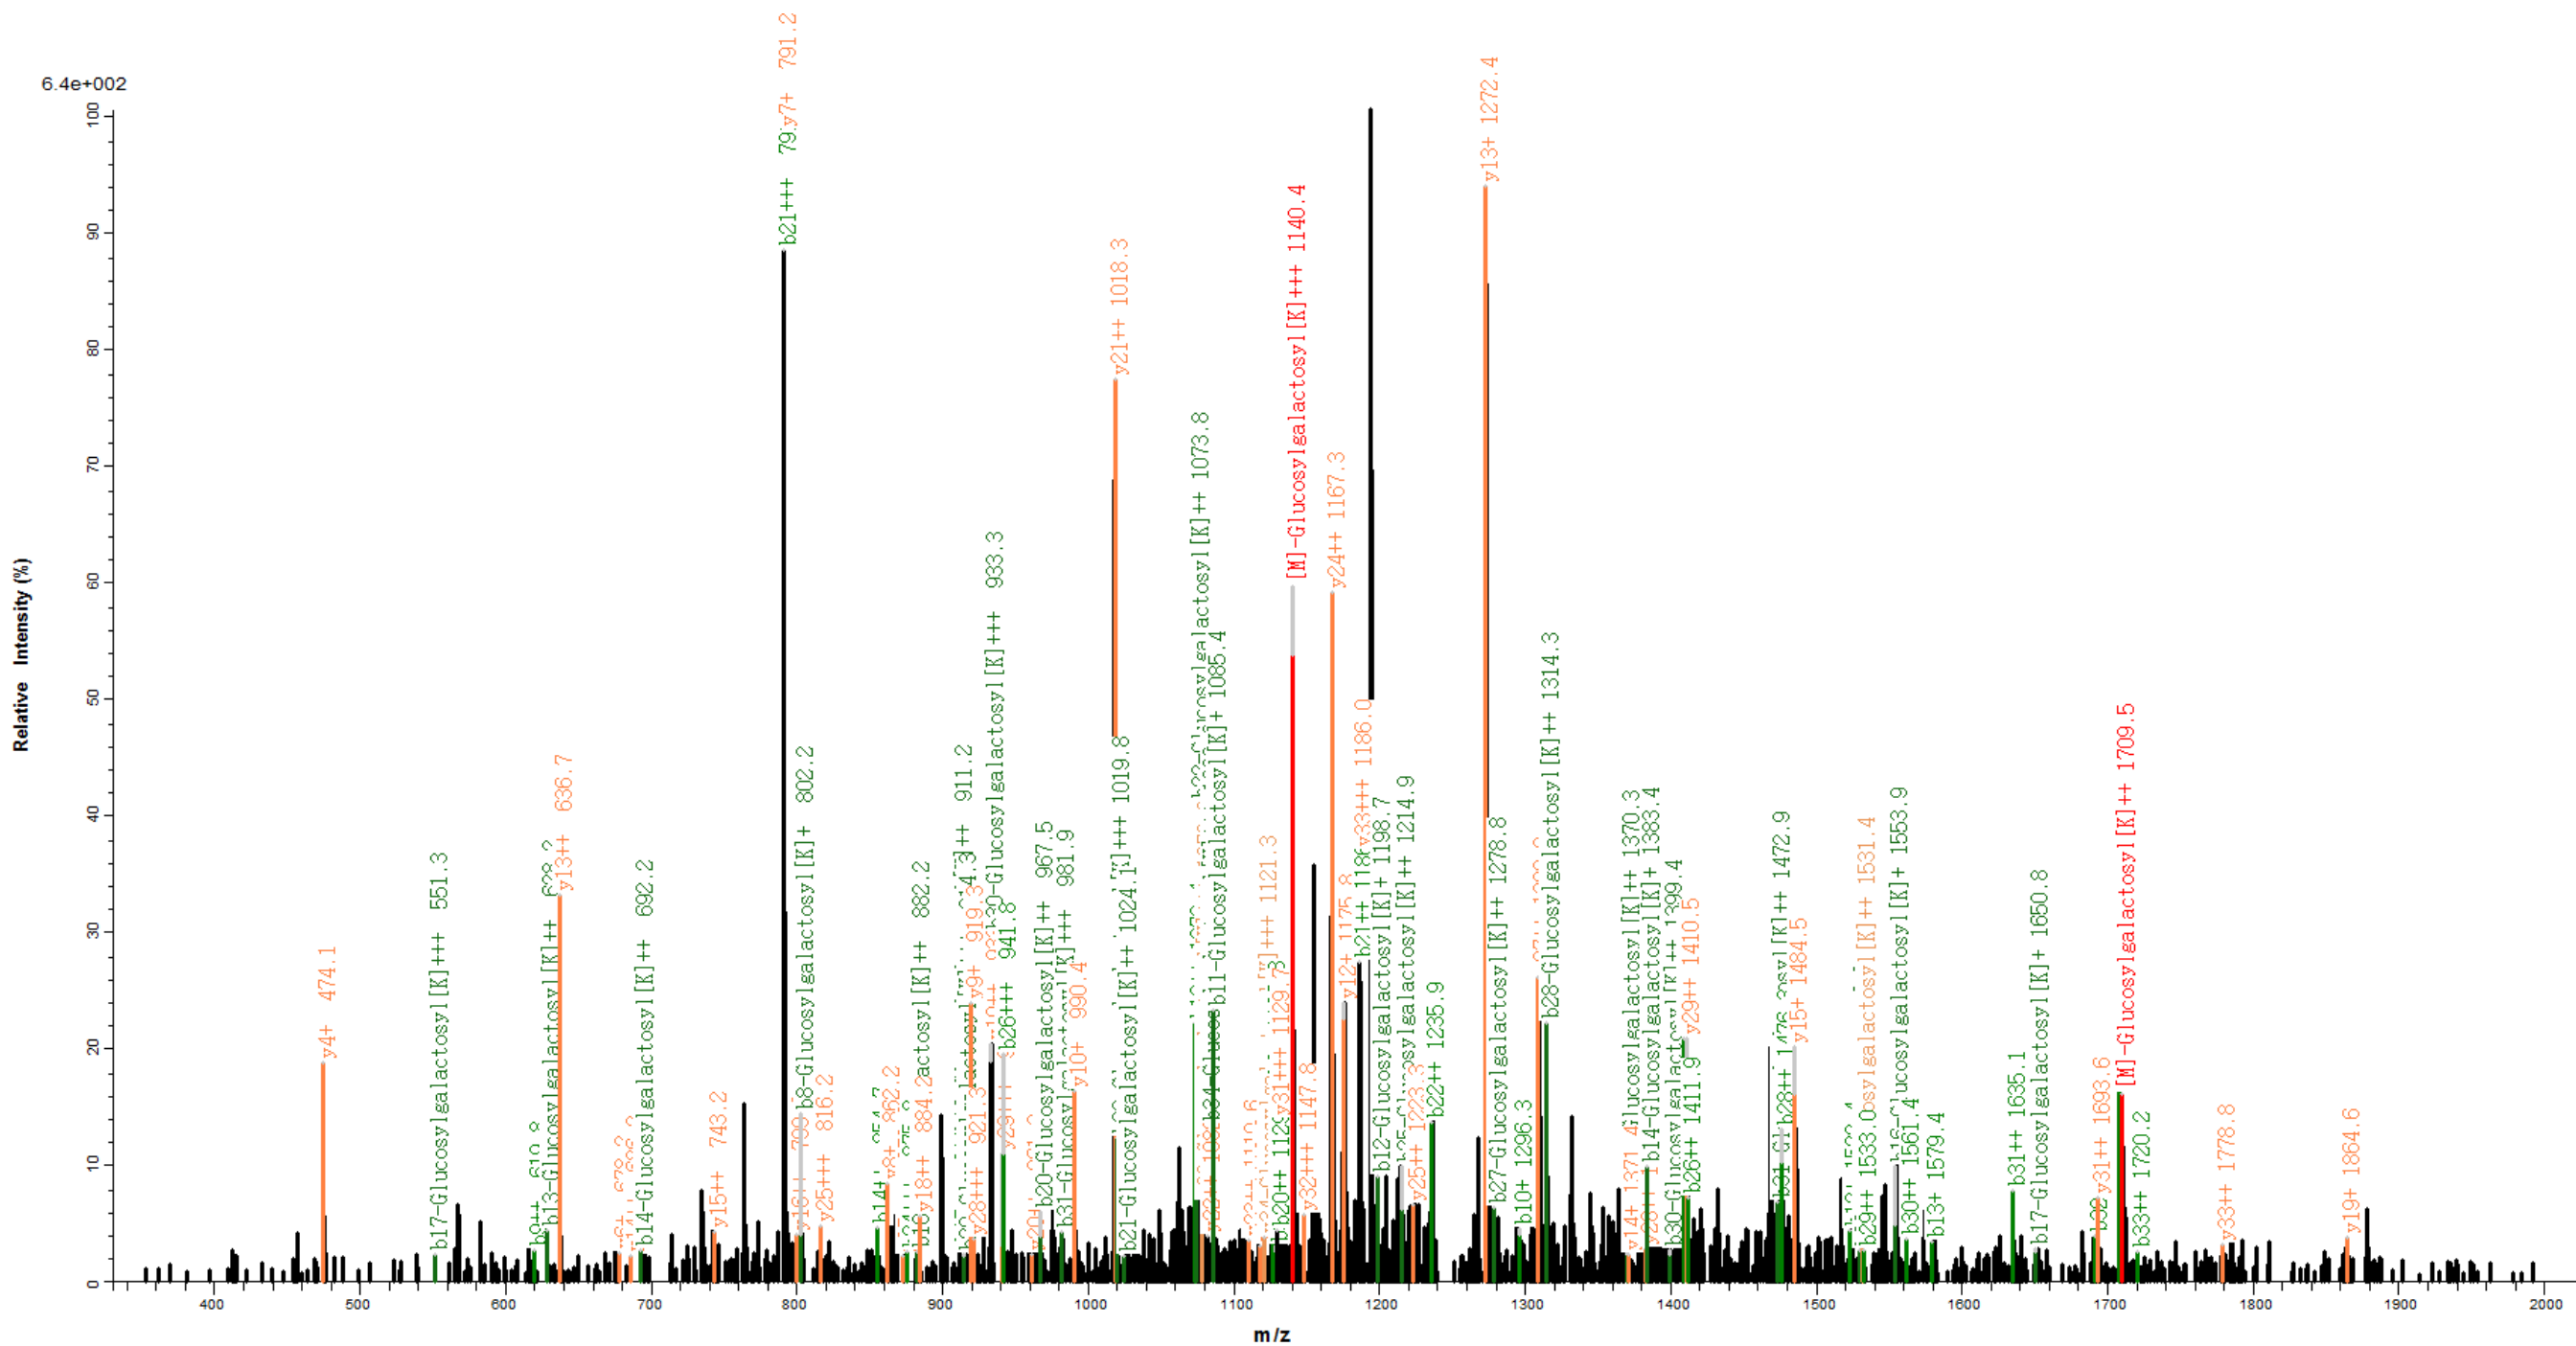



m/z = 942.94; charge = +4

PSM showing the identification of Galactosyl-HyK<sup>361</sup>

Human col4a1 chain

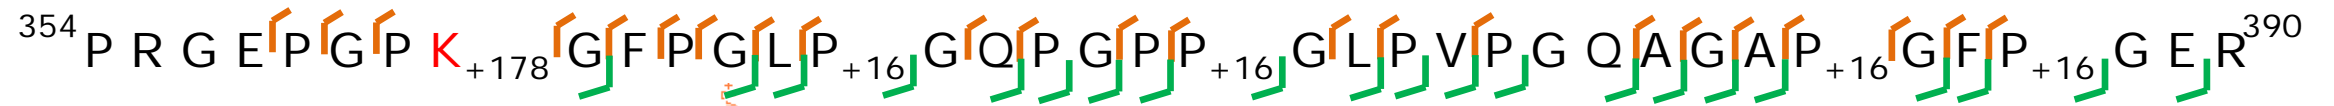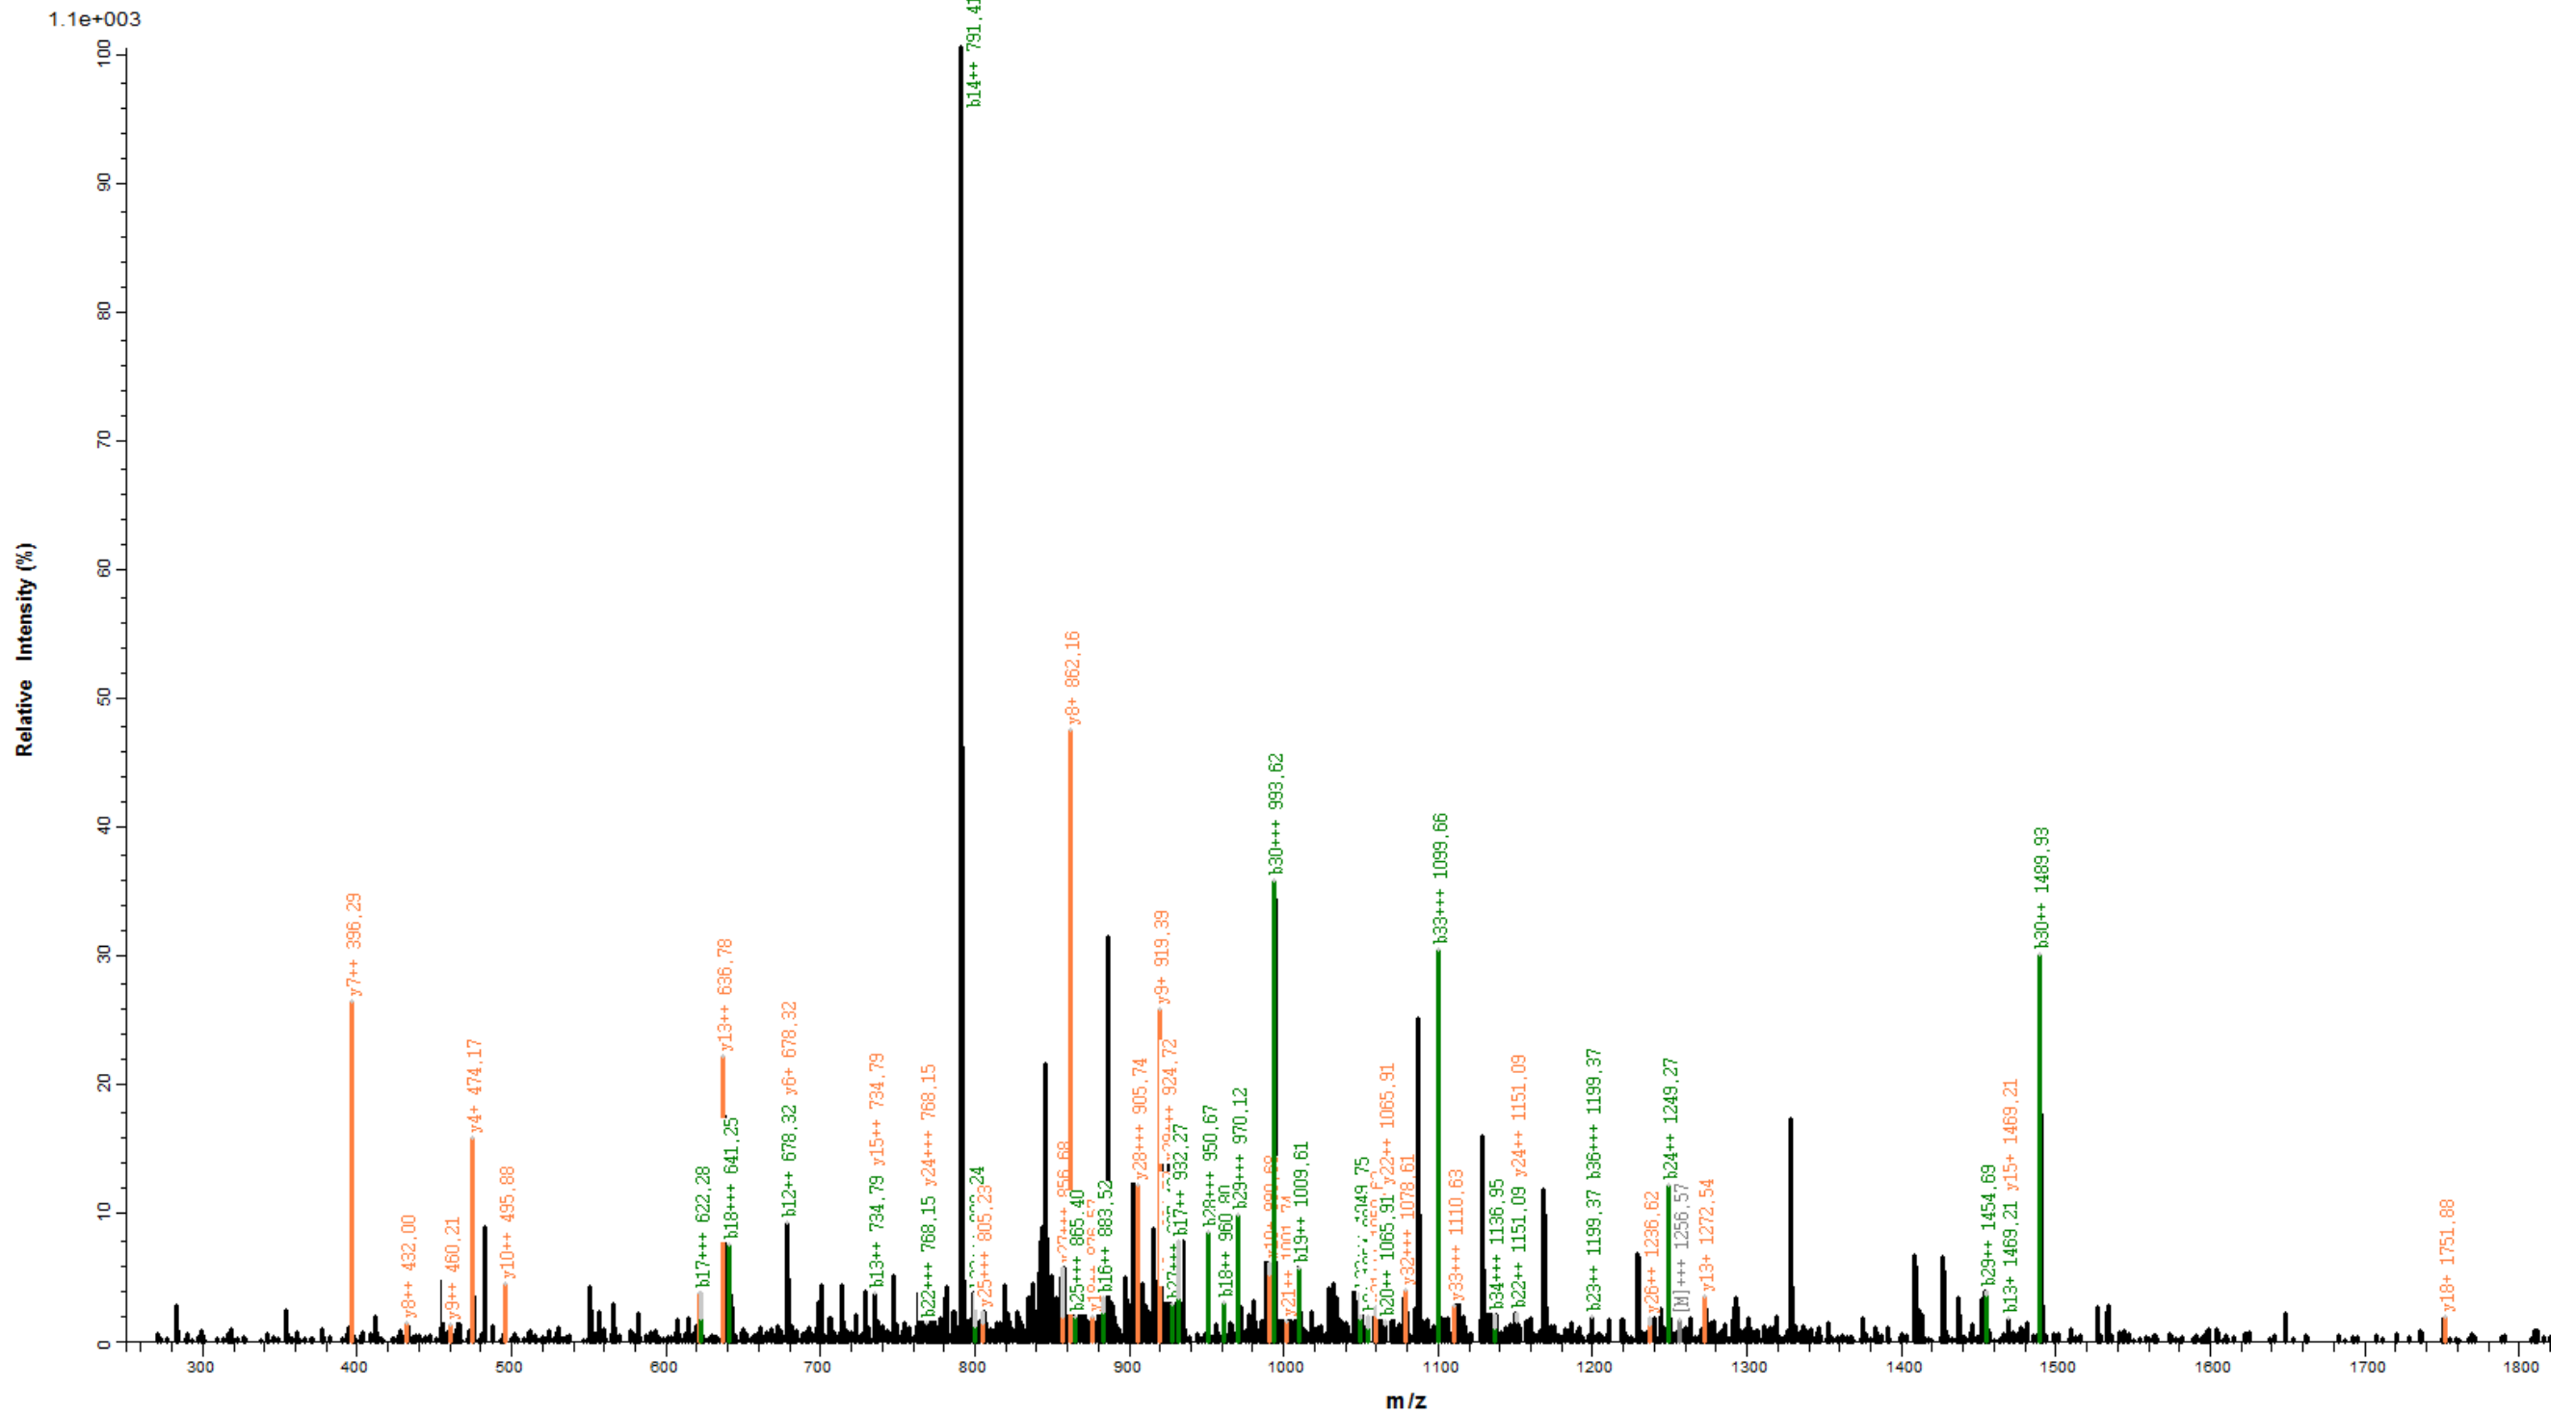

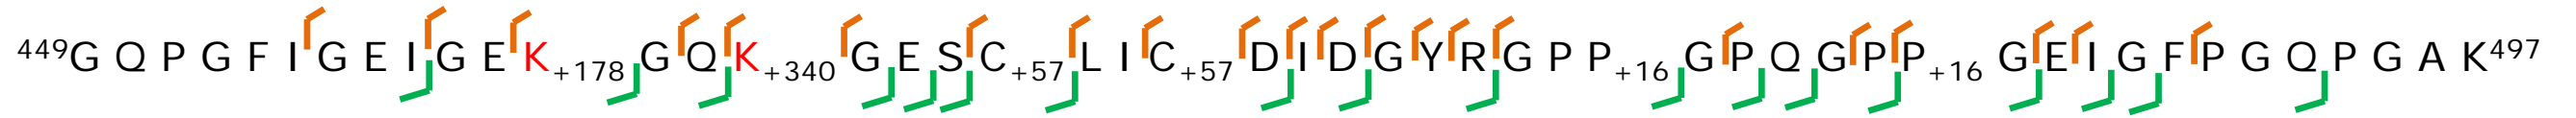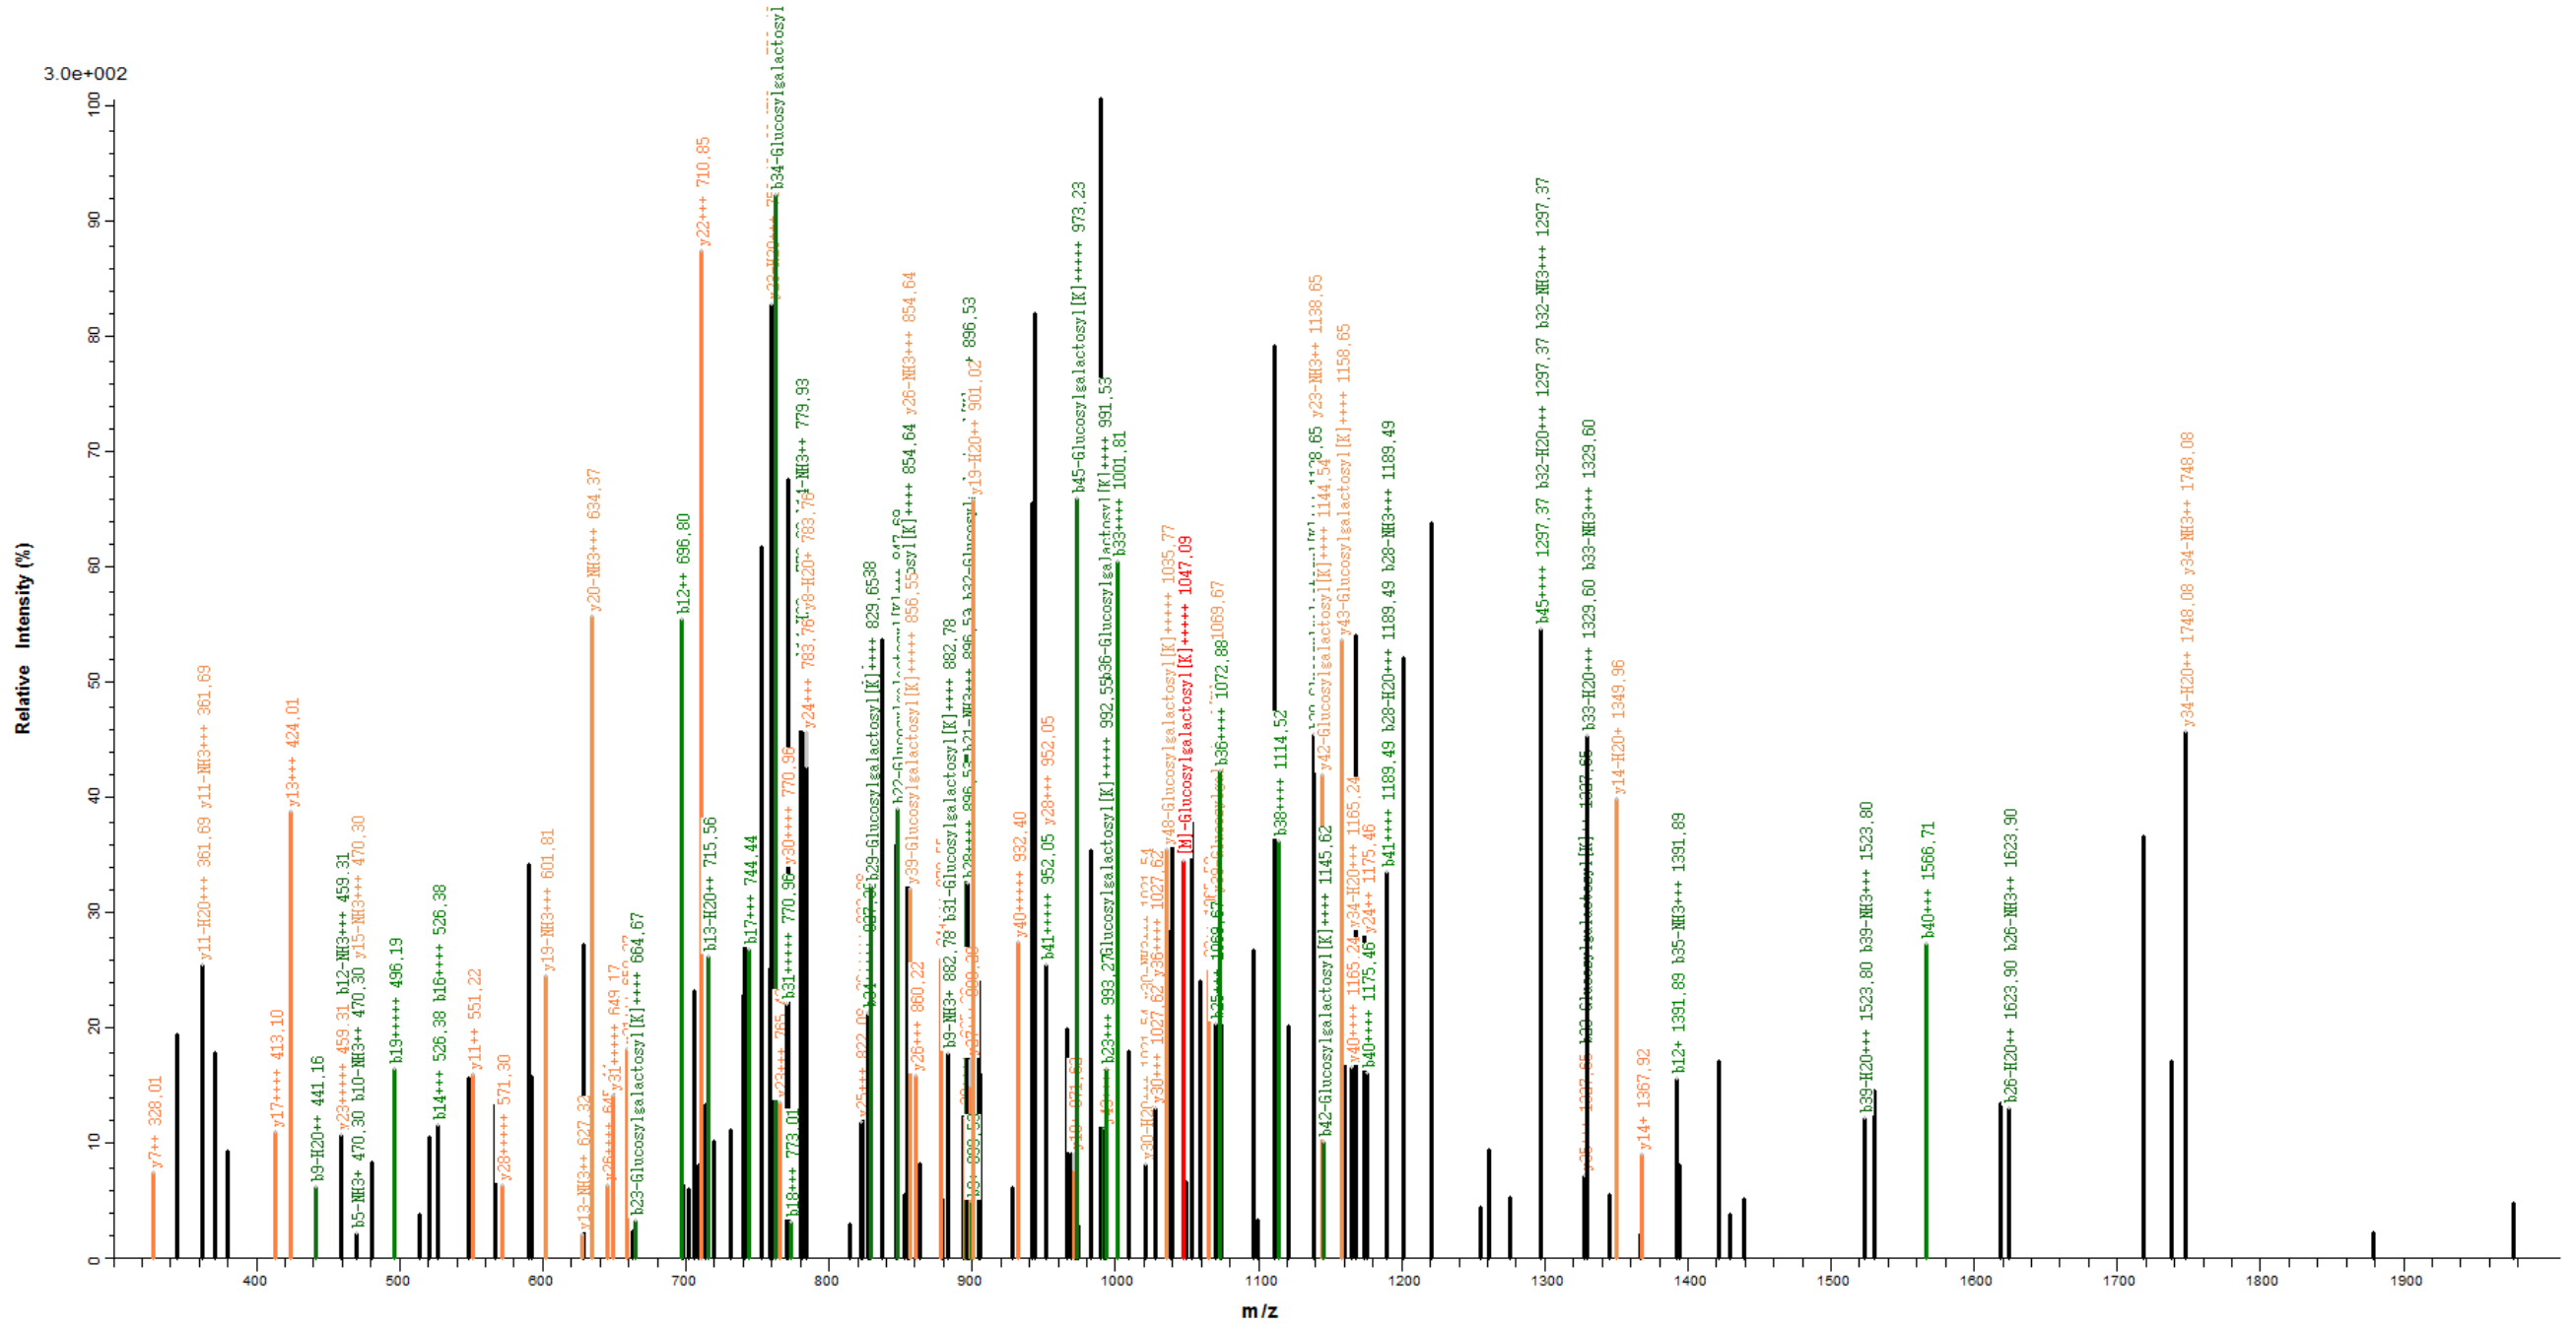

m/z = 881.4156; charge = +3

PSM showing the identification of Glucosylgalactosyl-HyK<sup>497</sup>

Human col4a1 chain

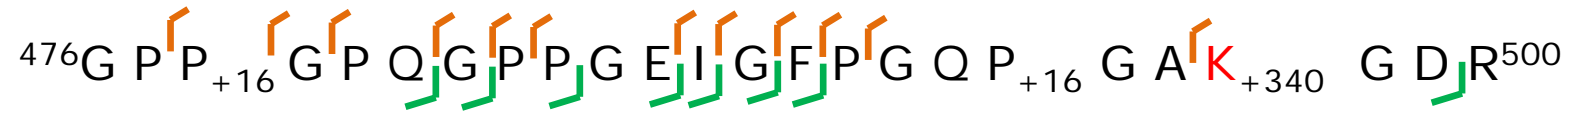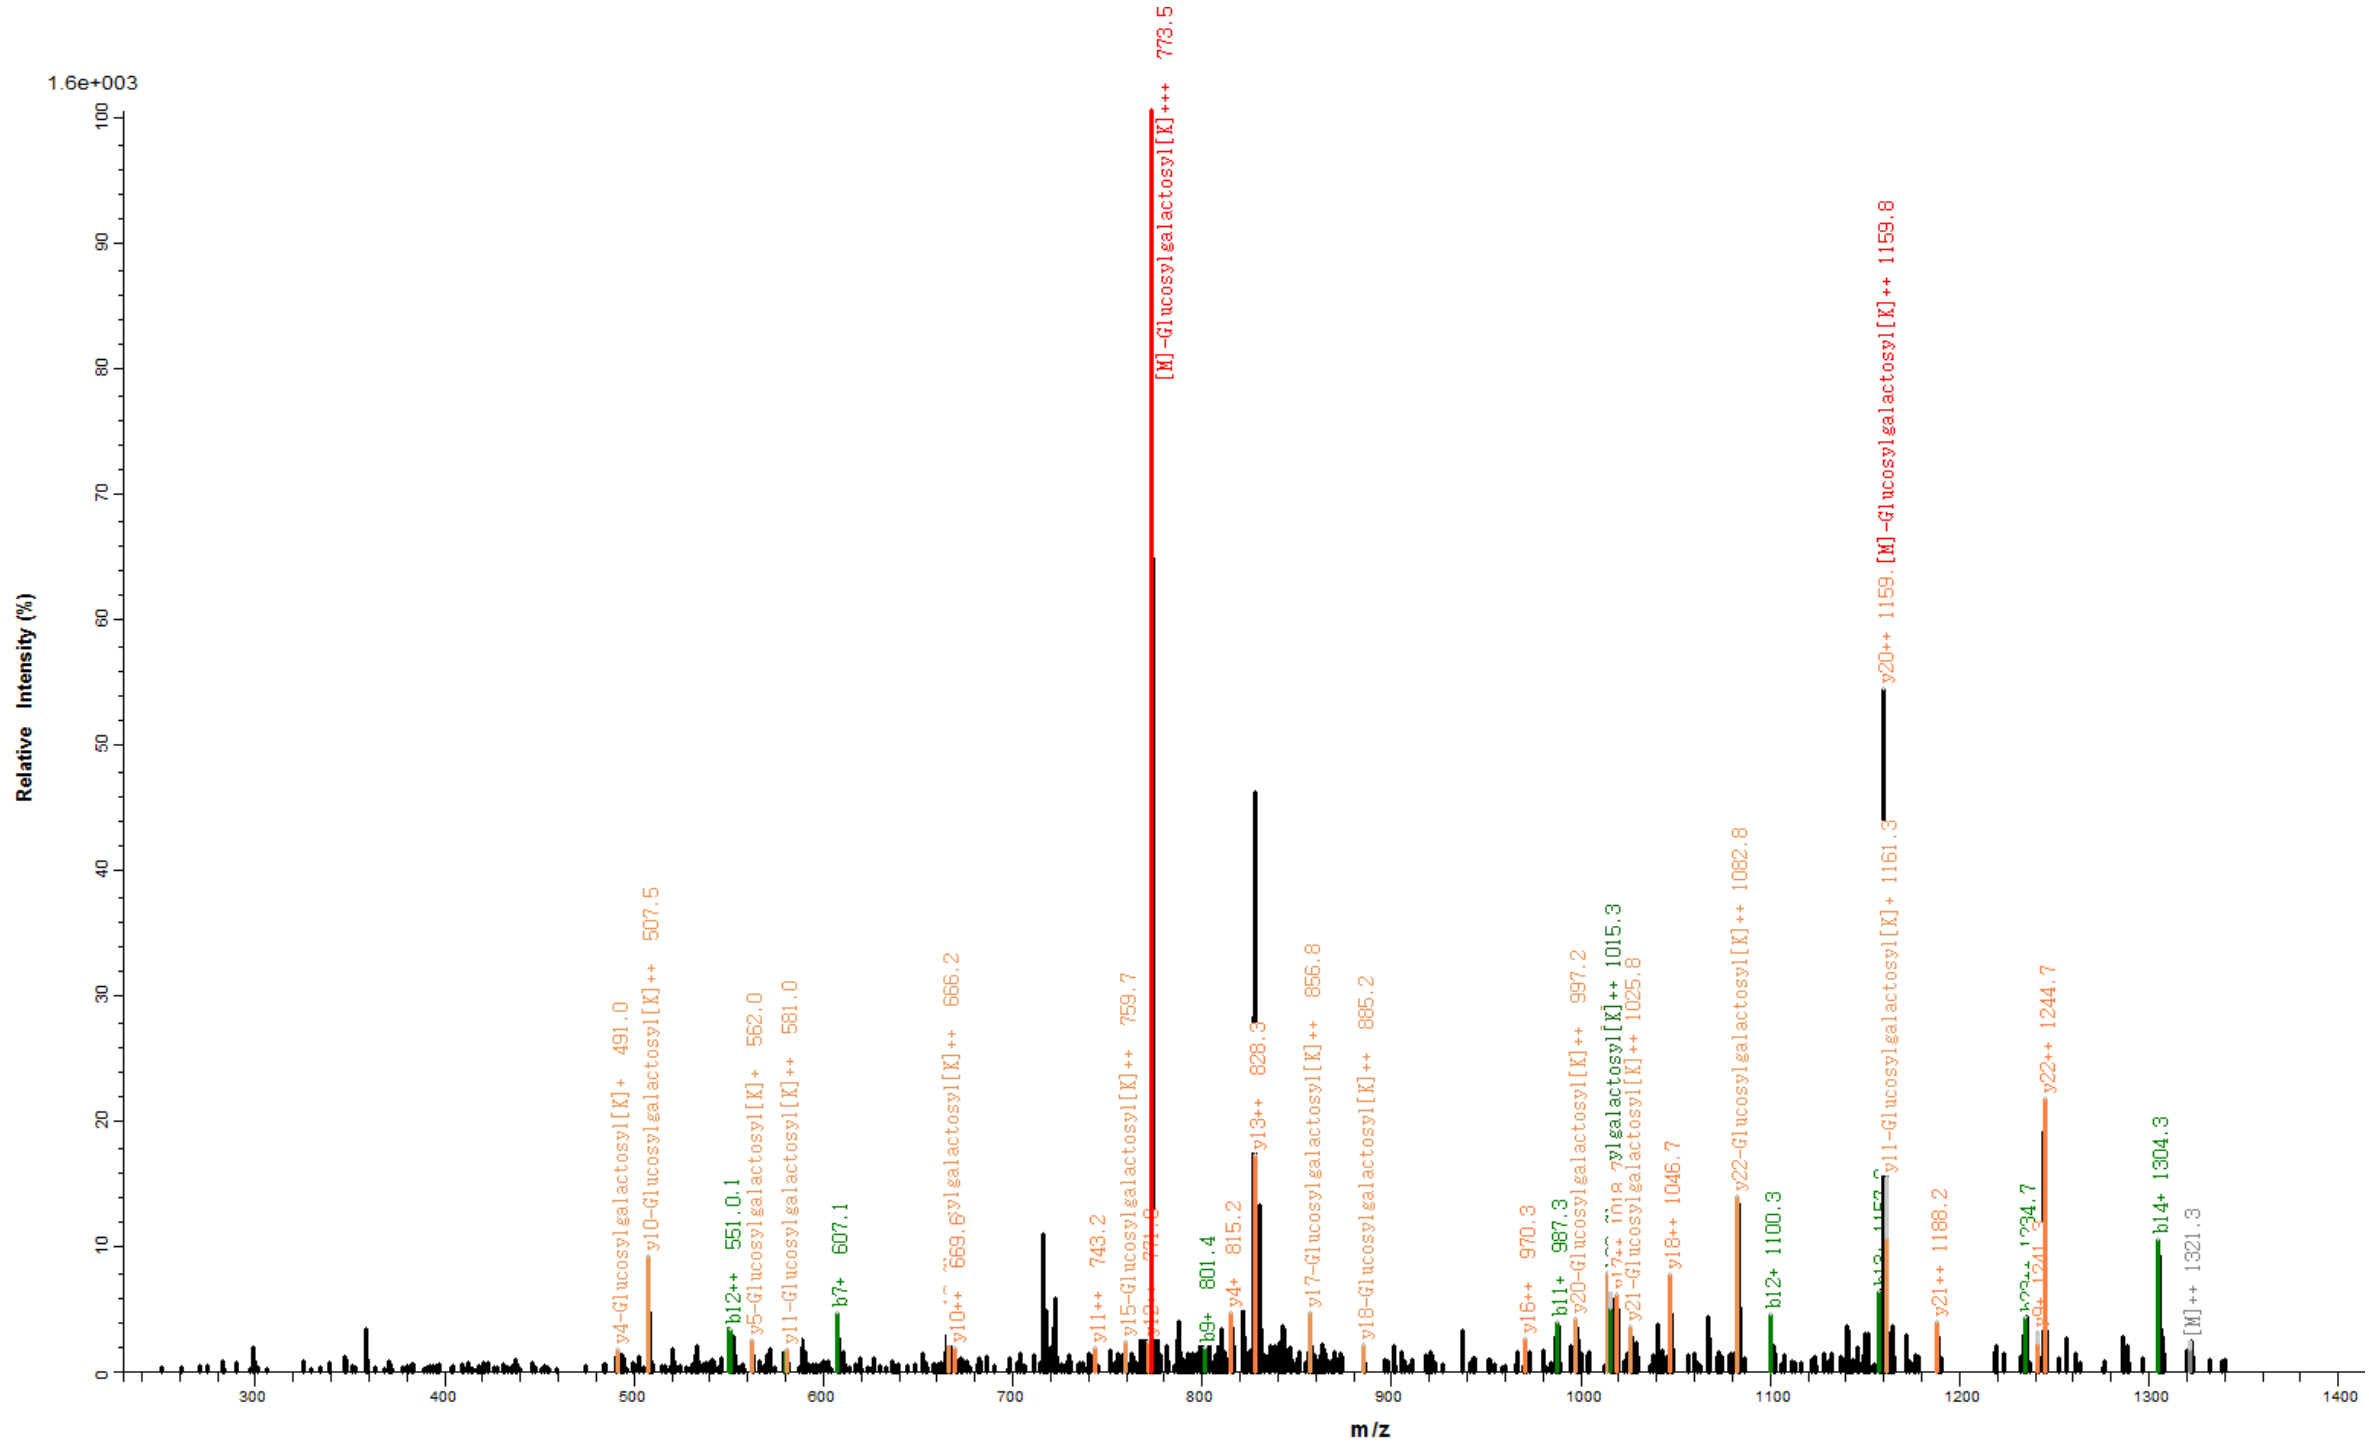

m/z= 1229.9143; charge= +3

PSM showing the identification of Glucosylgalactosyl-HyK<sup>527</sup>

Human col4a1 chain

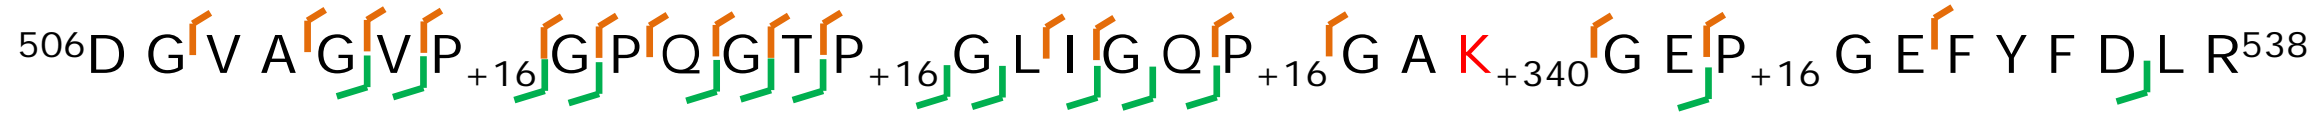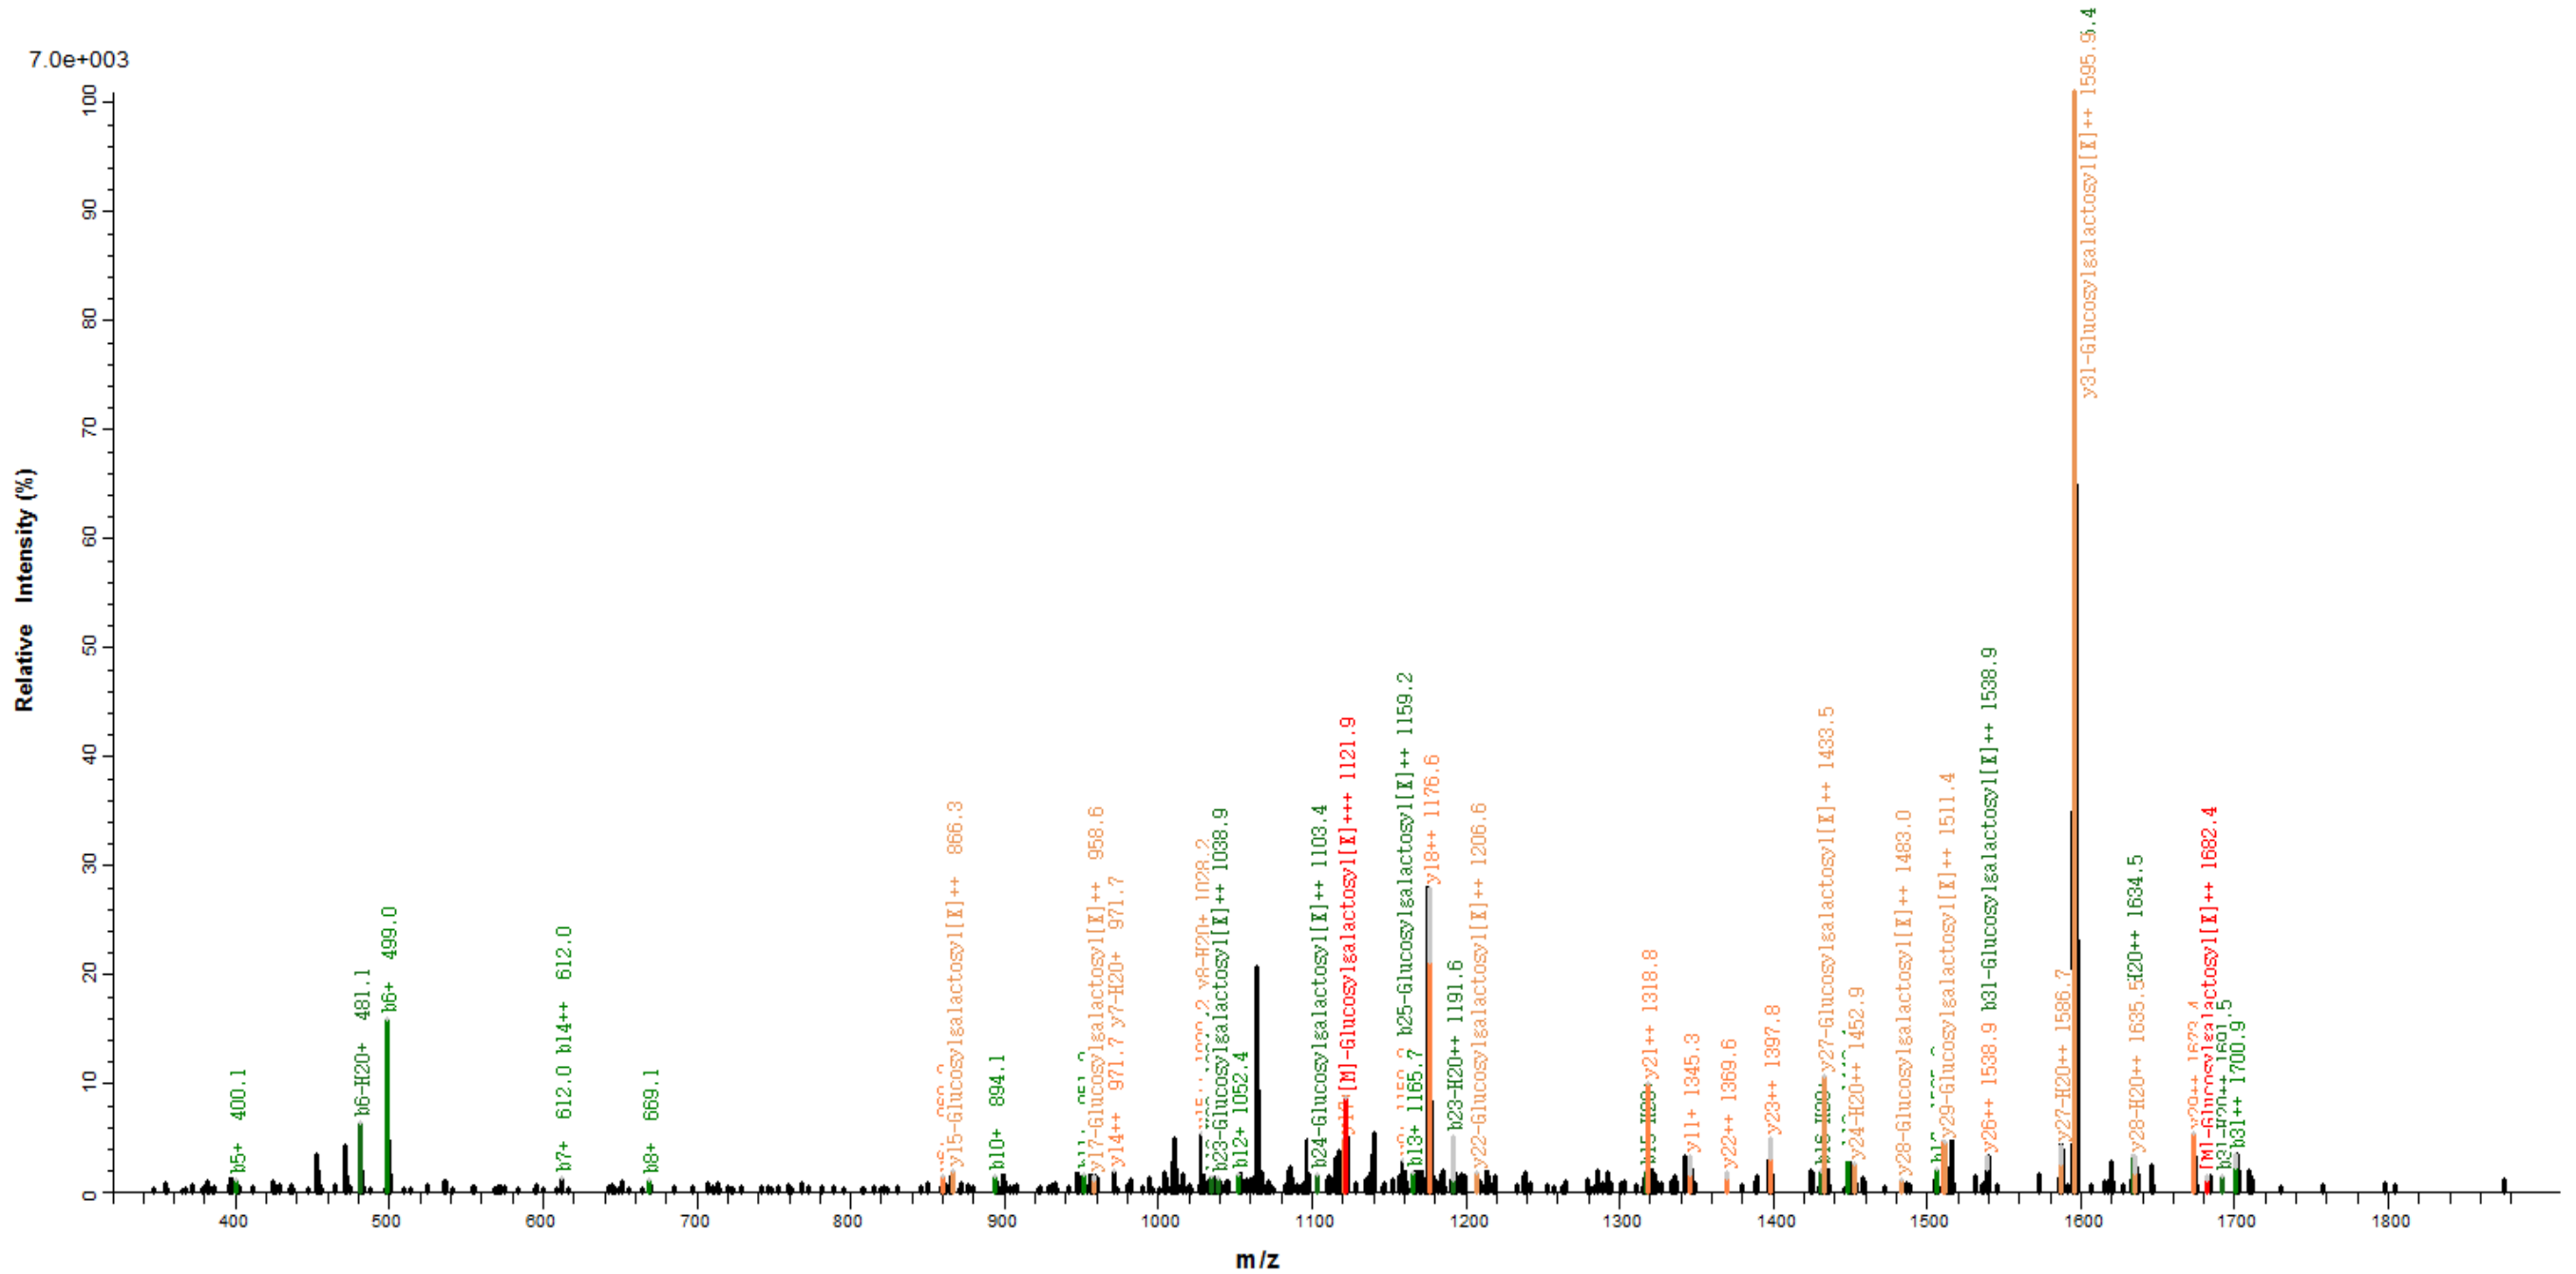

m/z = 566.2649; charge = +5

PSM showing the identification of Glucosylgalactosyl-HyK<sup>573</sup>

Human col4a1 chain

564 D G H P +16 G L P +16 G P K +340 G S P +16 G S V G L K +16 G E R G P P +16 G 580

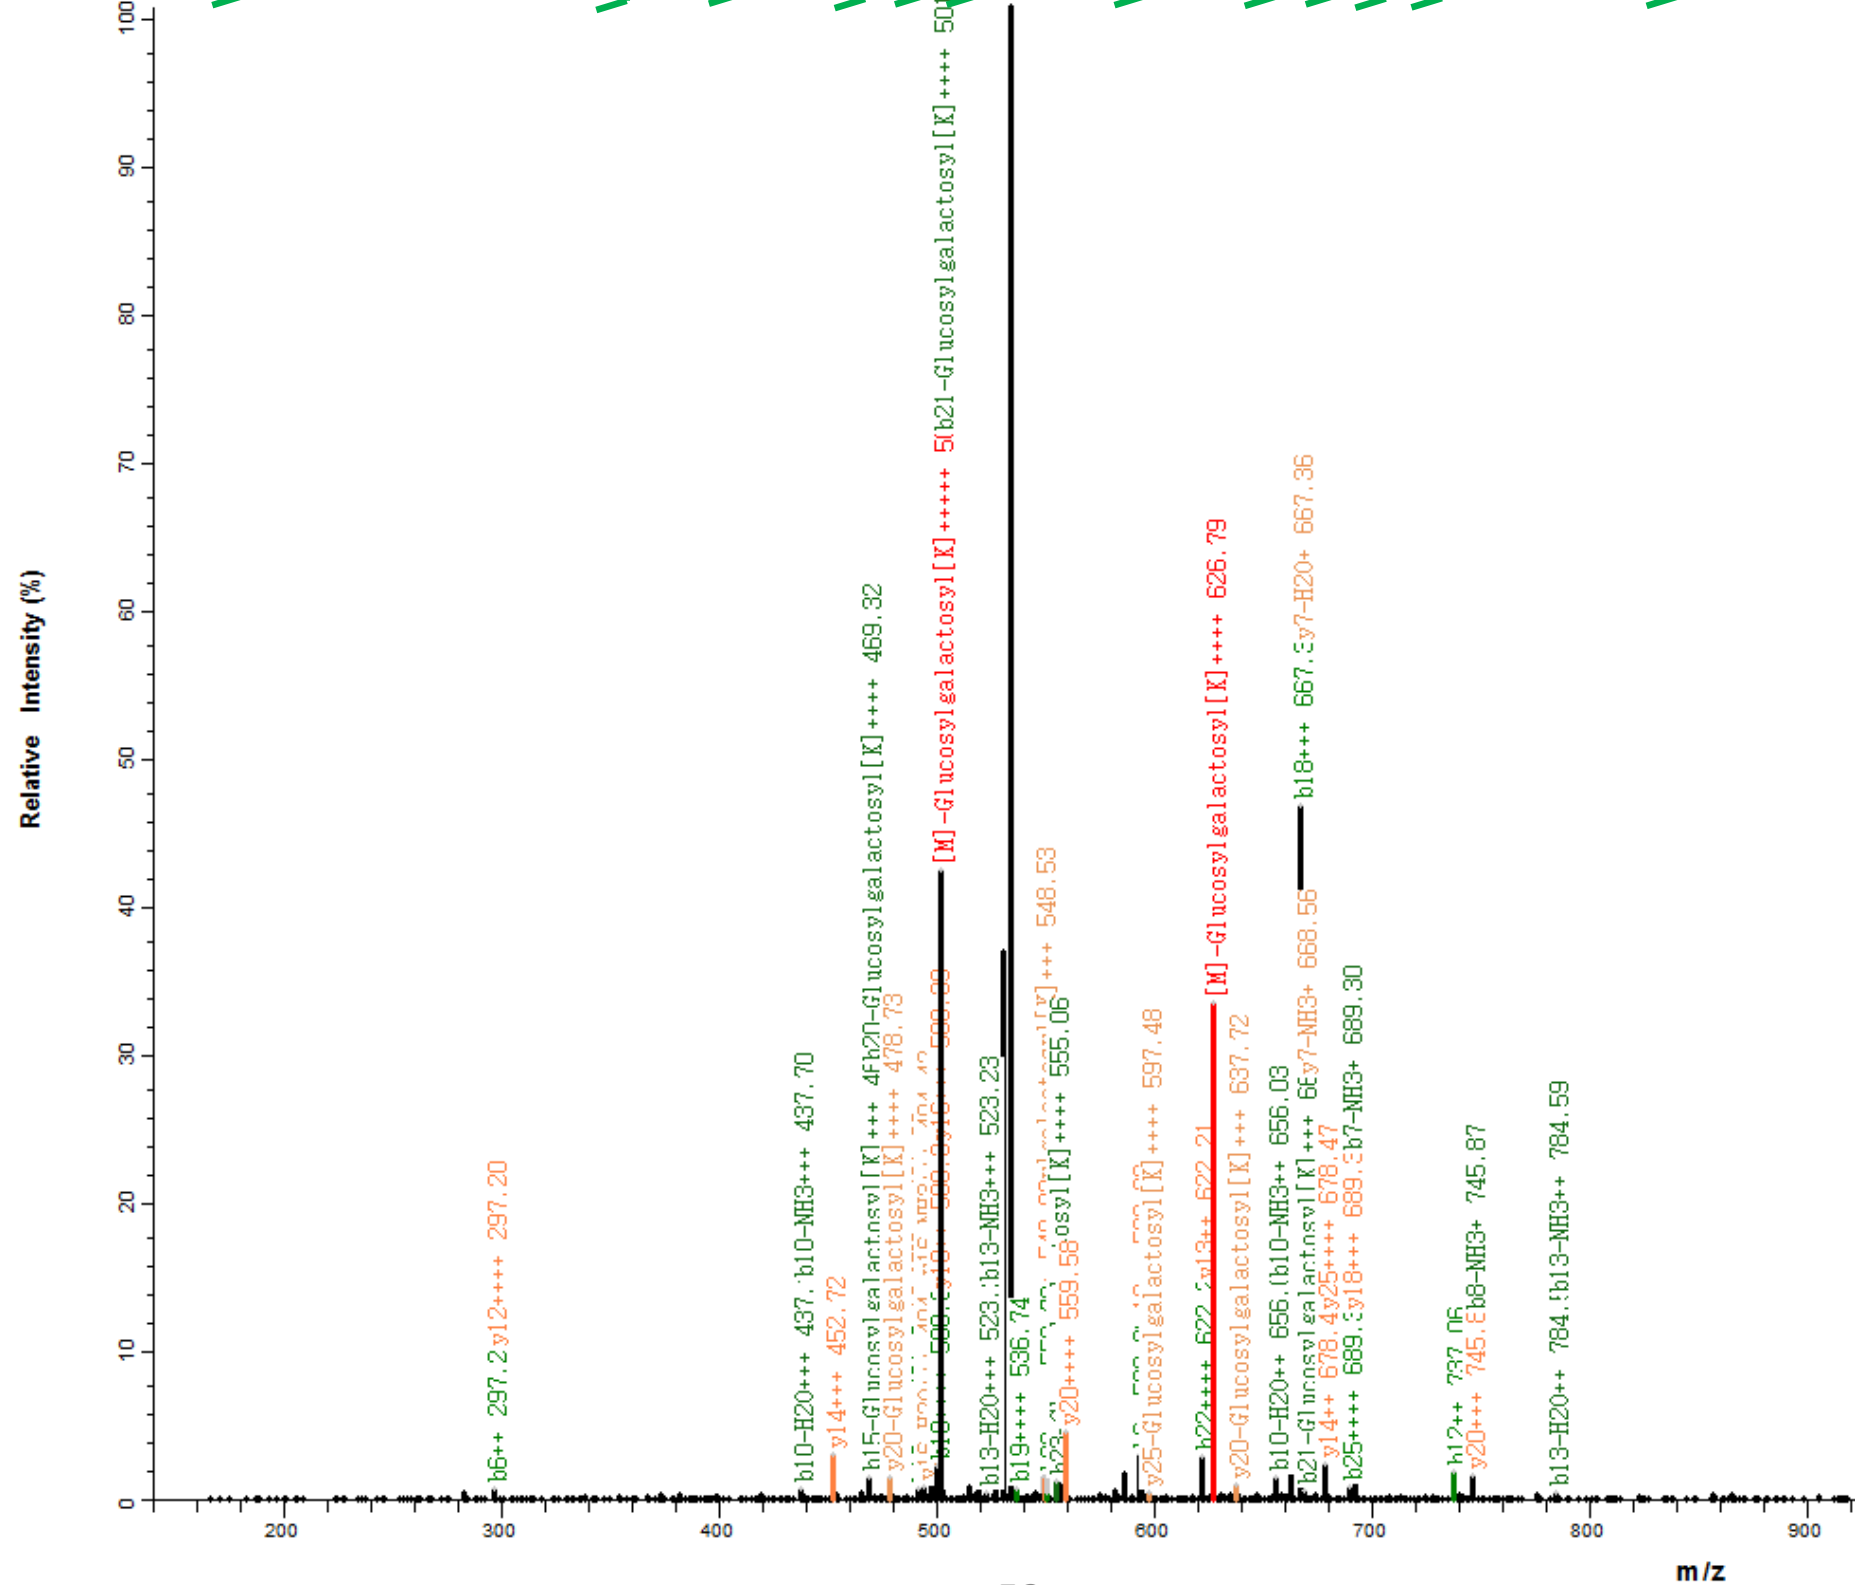

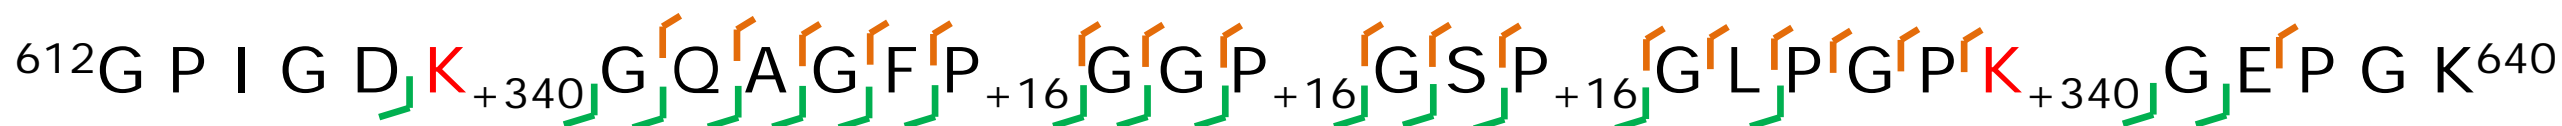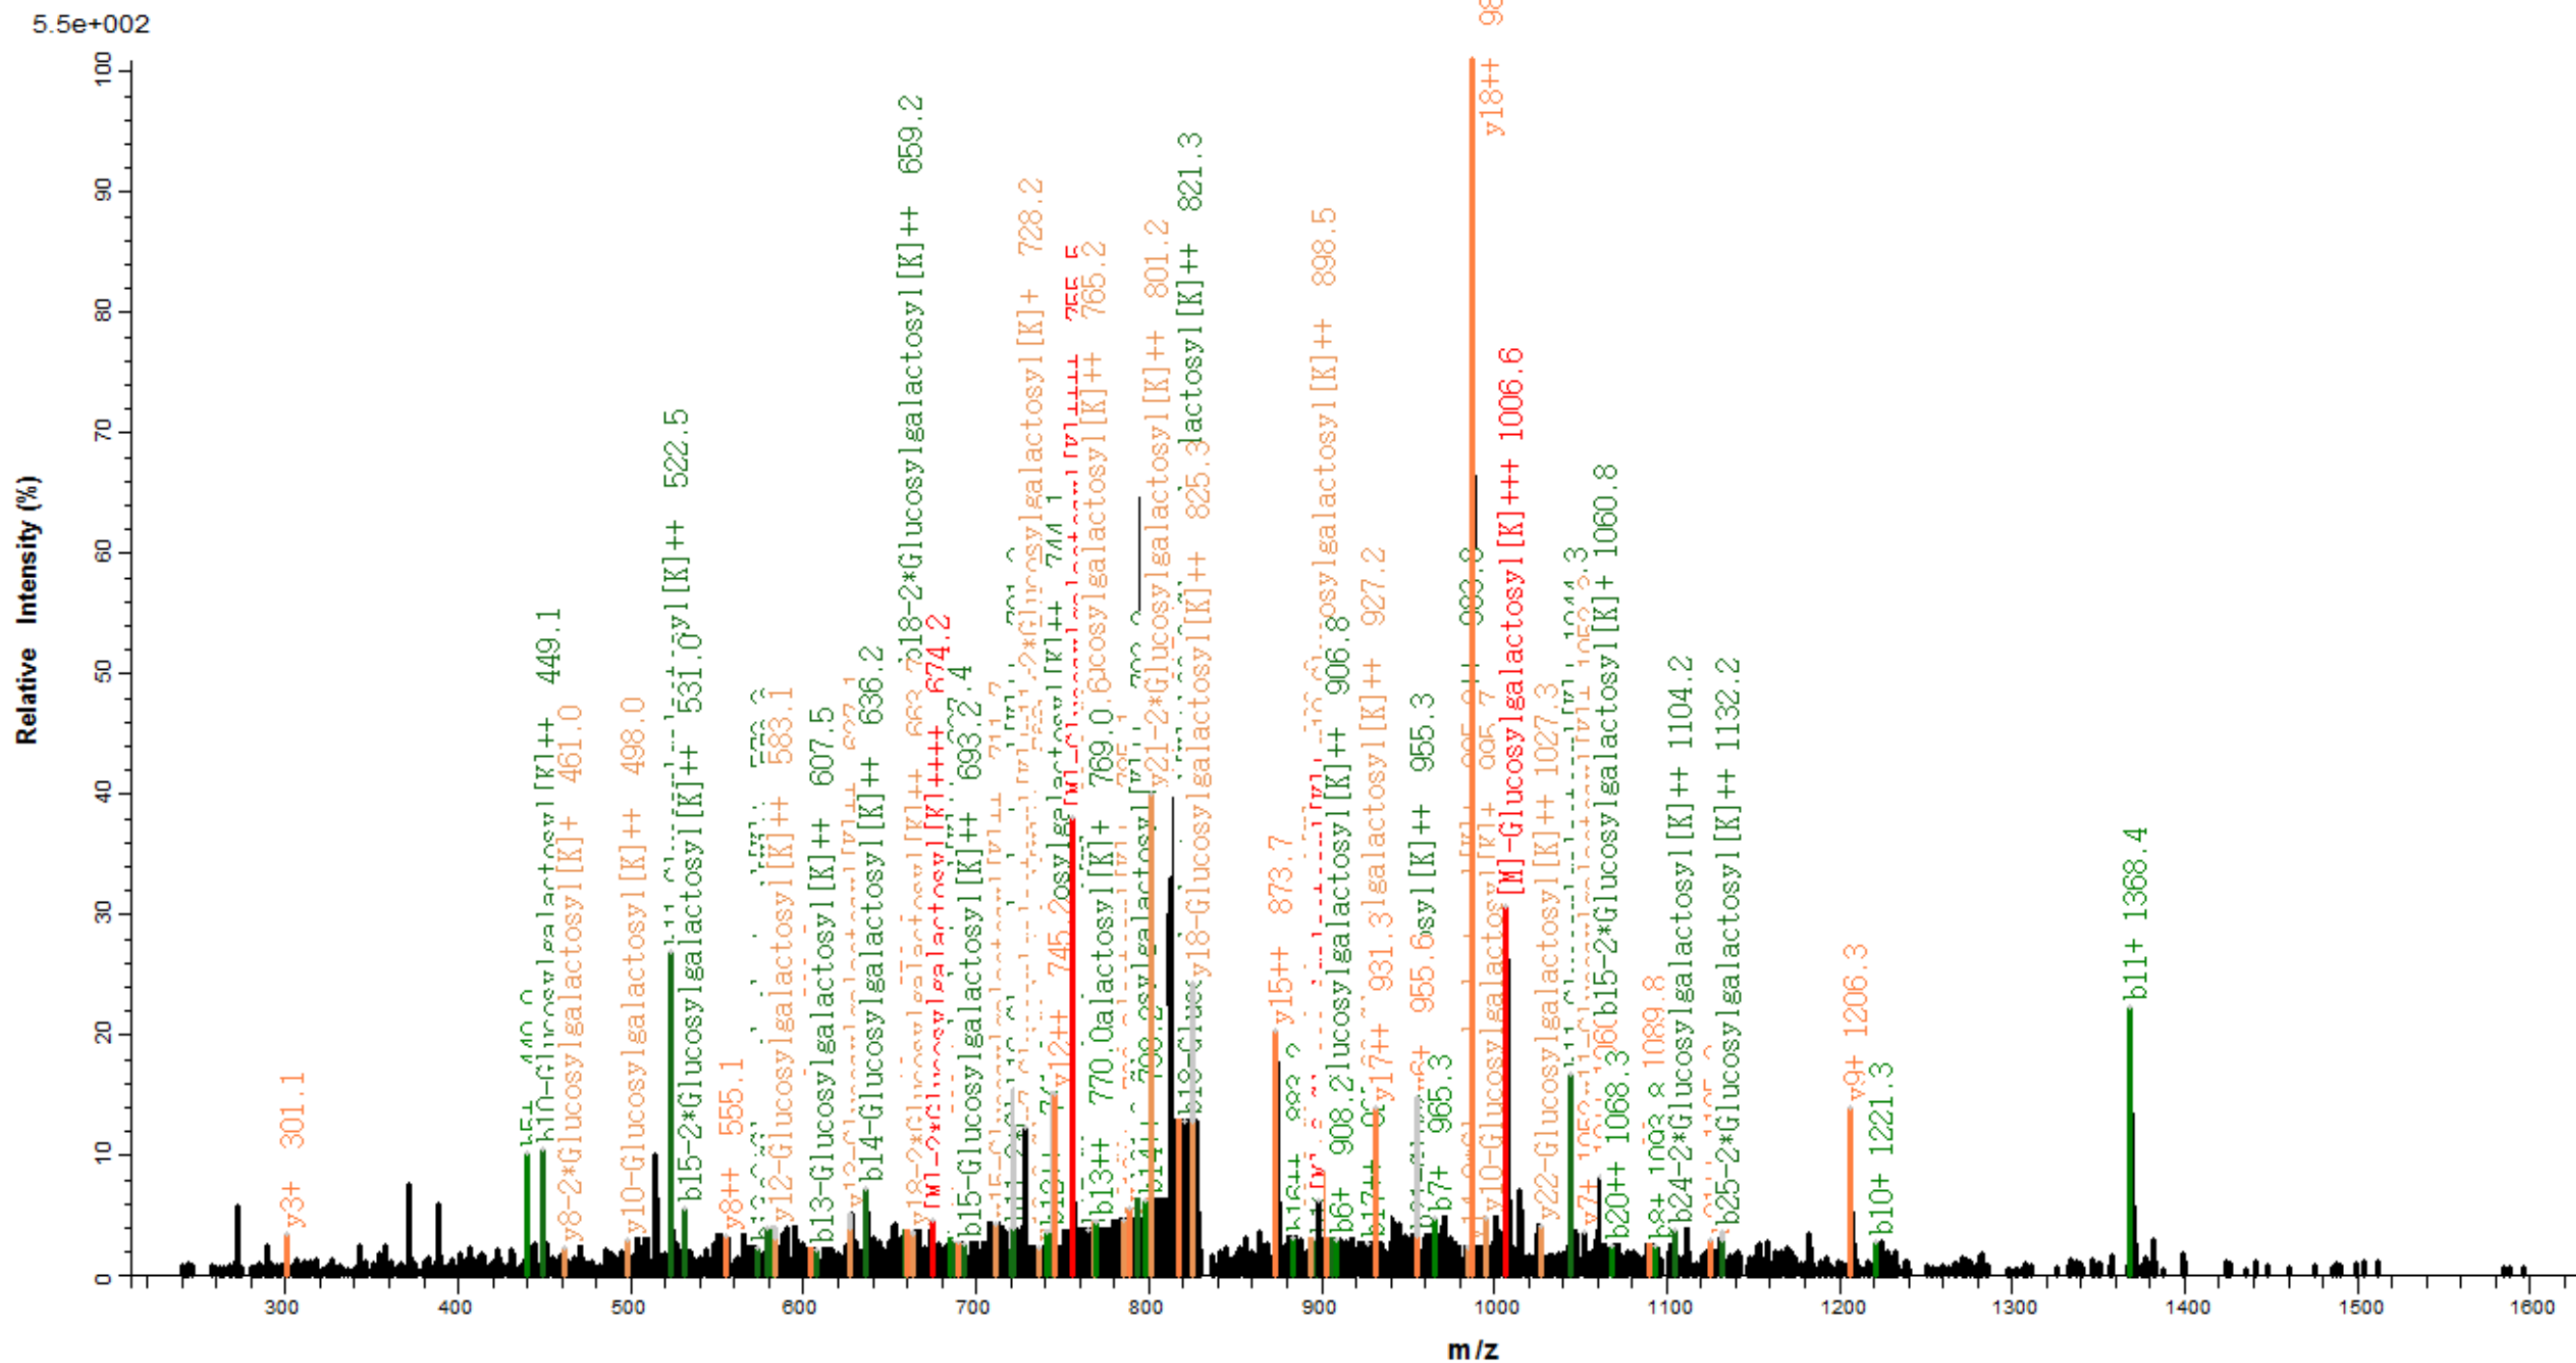

m/z = 862.9186 charge = +4

PSM showing the identification of Glucosylgalactosyl-HyK<sup>681</sup>

Human col4a1 chain

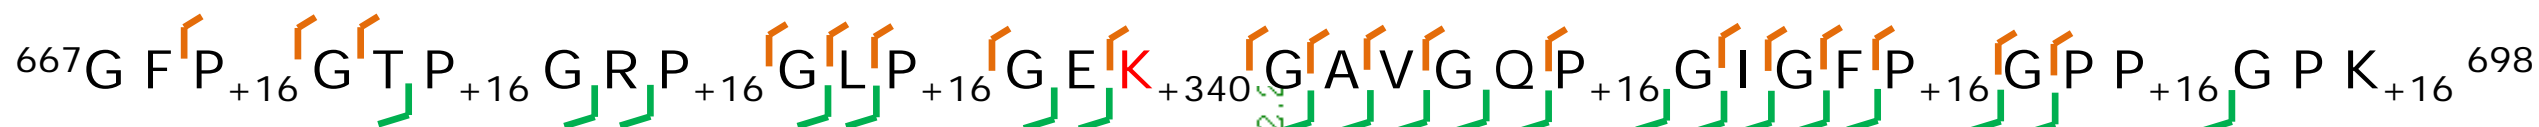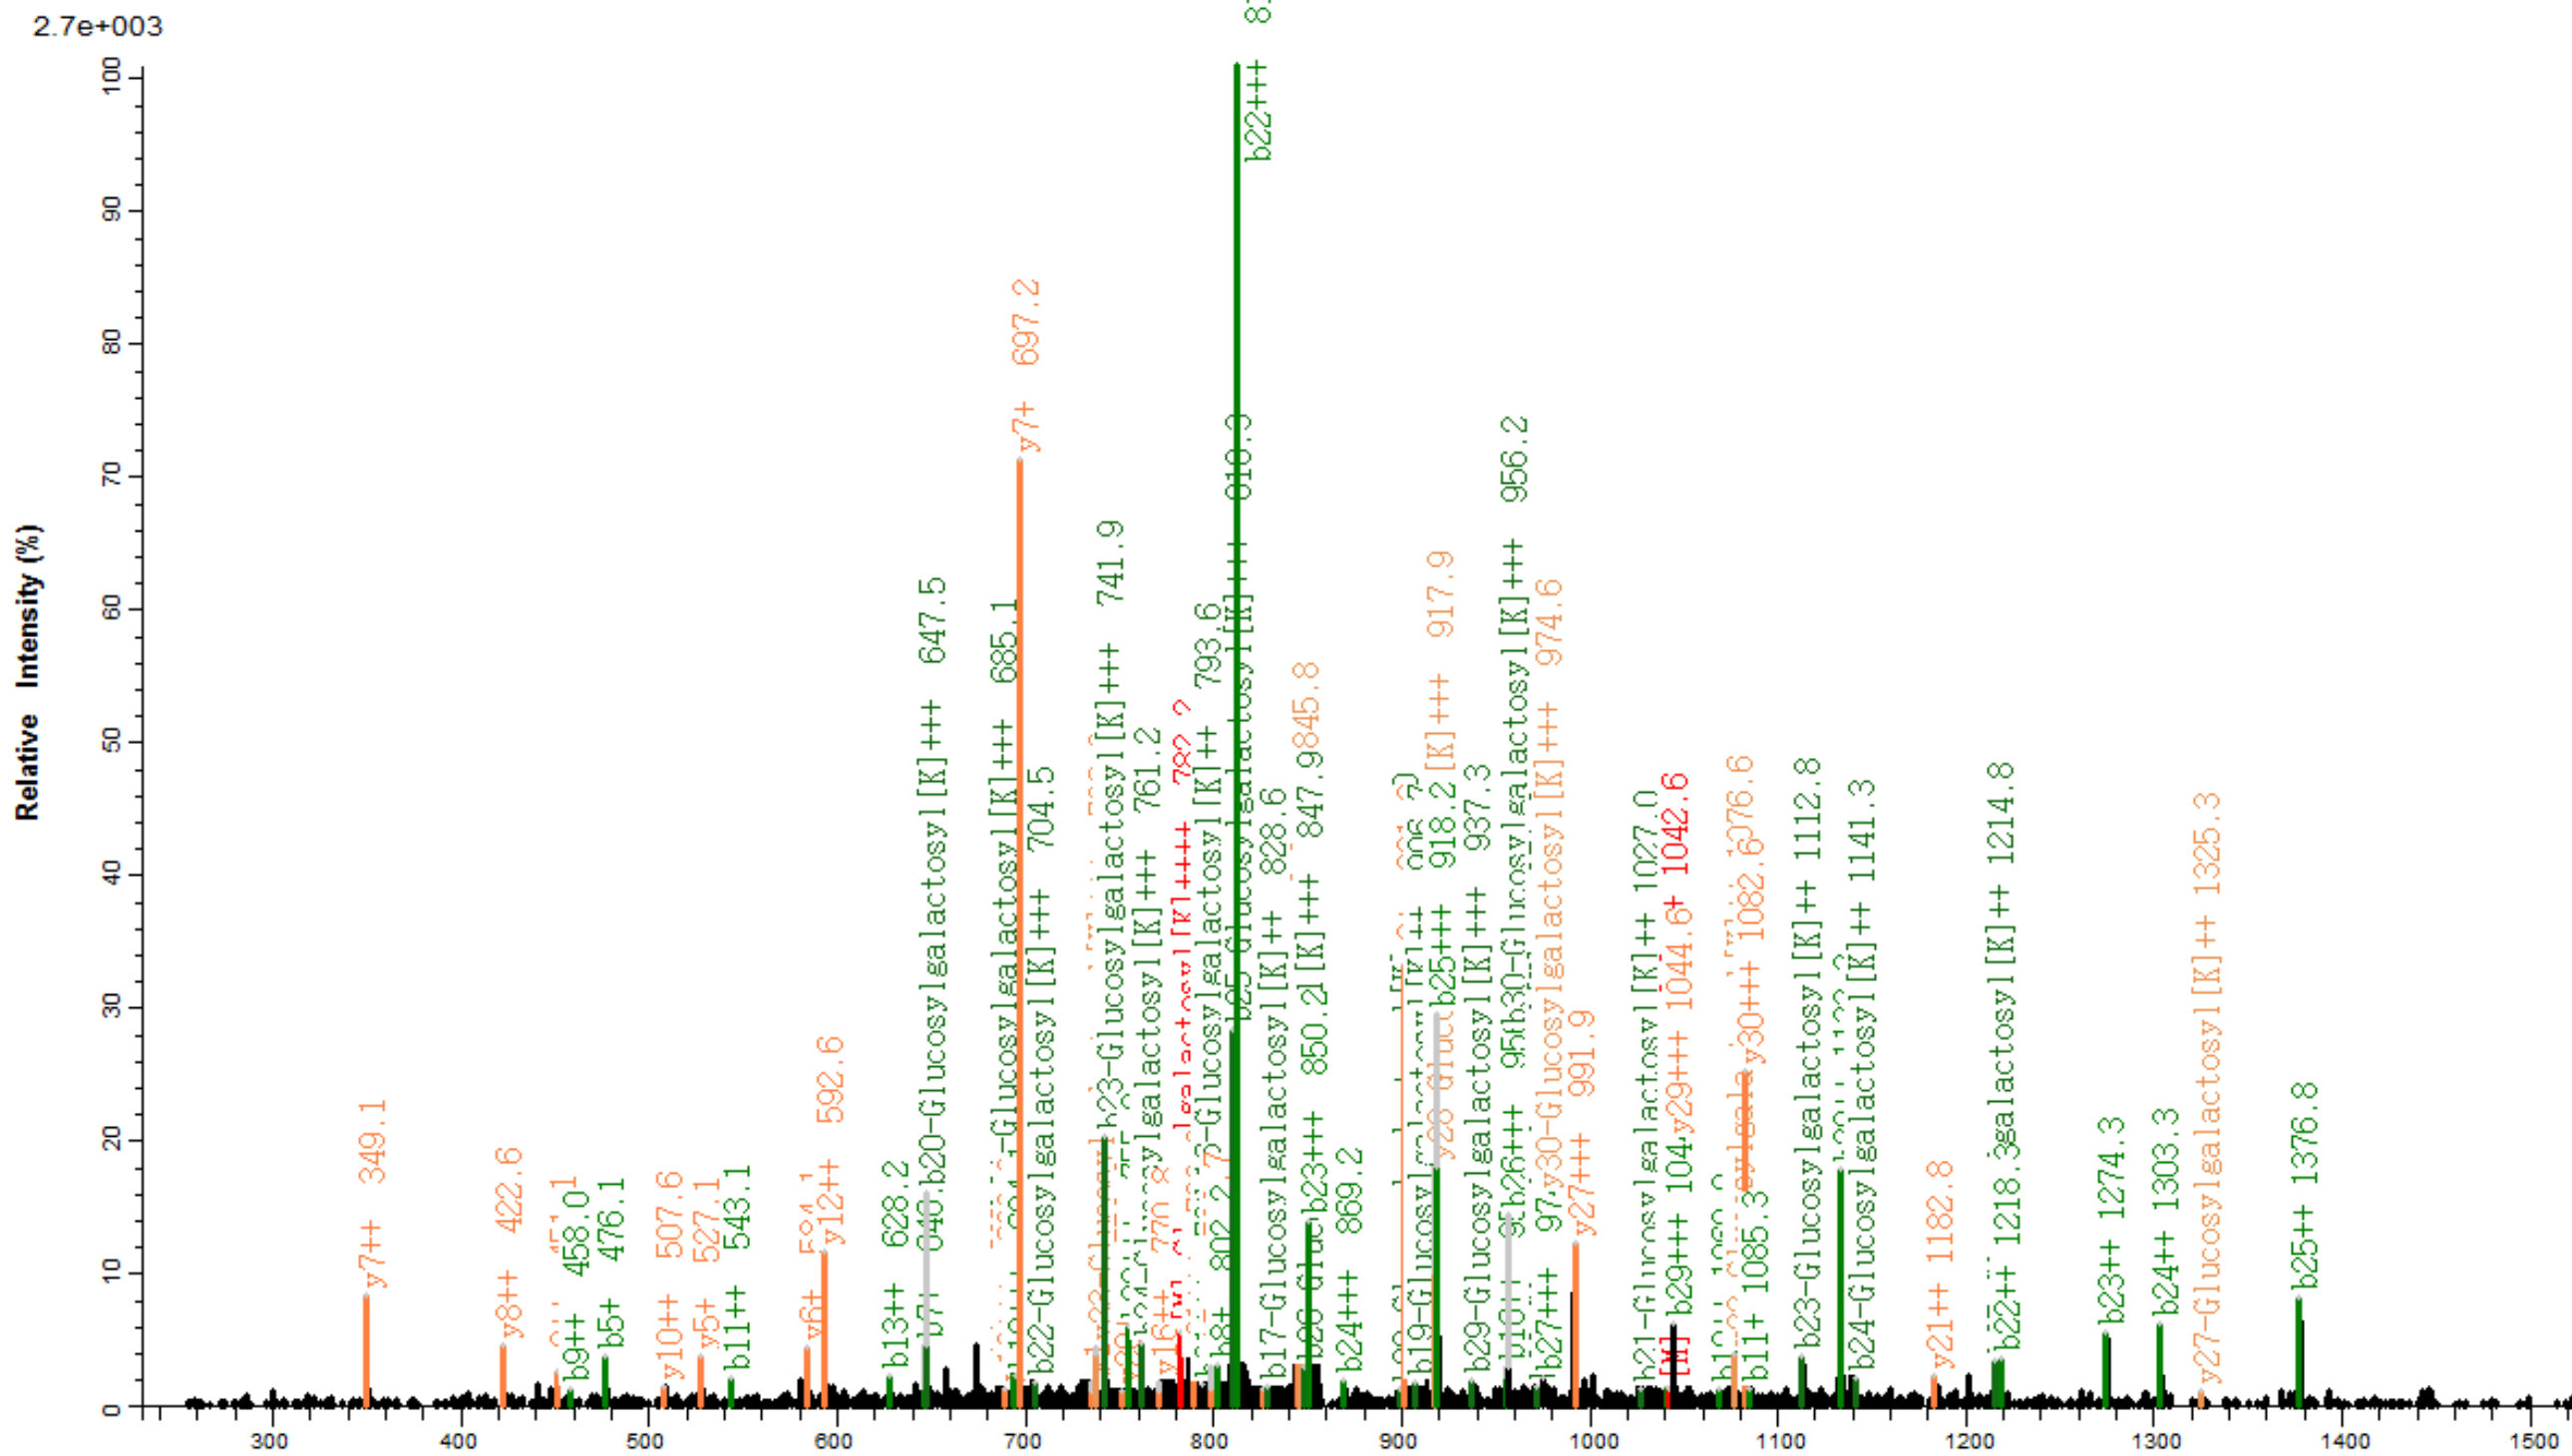

m/z = 1089.1052 charge = +5

PSM showing the identification of Glucosylgalactosyl-HyK<sup>698</sup>

Human col4a1 chain

<sup>693</sup>G P P G P K<sub>+340</sub> G V D G L P G D M G P P<sub>+16</sub> G T P<sub>+16</sub> G R P G F N G L P<sub>+16</sub> G N P<sub>+16</sub> G V Q G Q K<sub>+340</sub> G E P<sub>+16</sub> G V G L P<sub>+16</sub> G L K

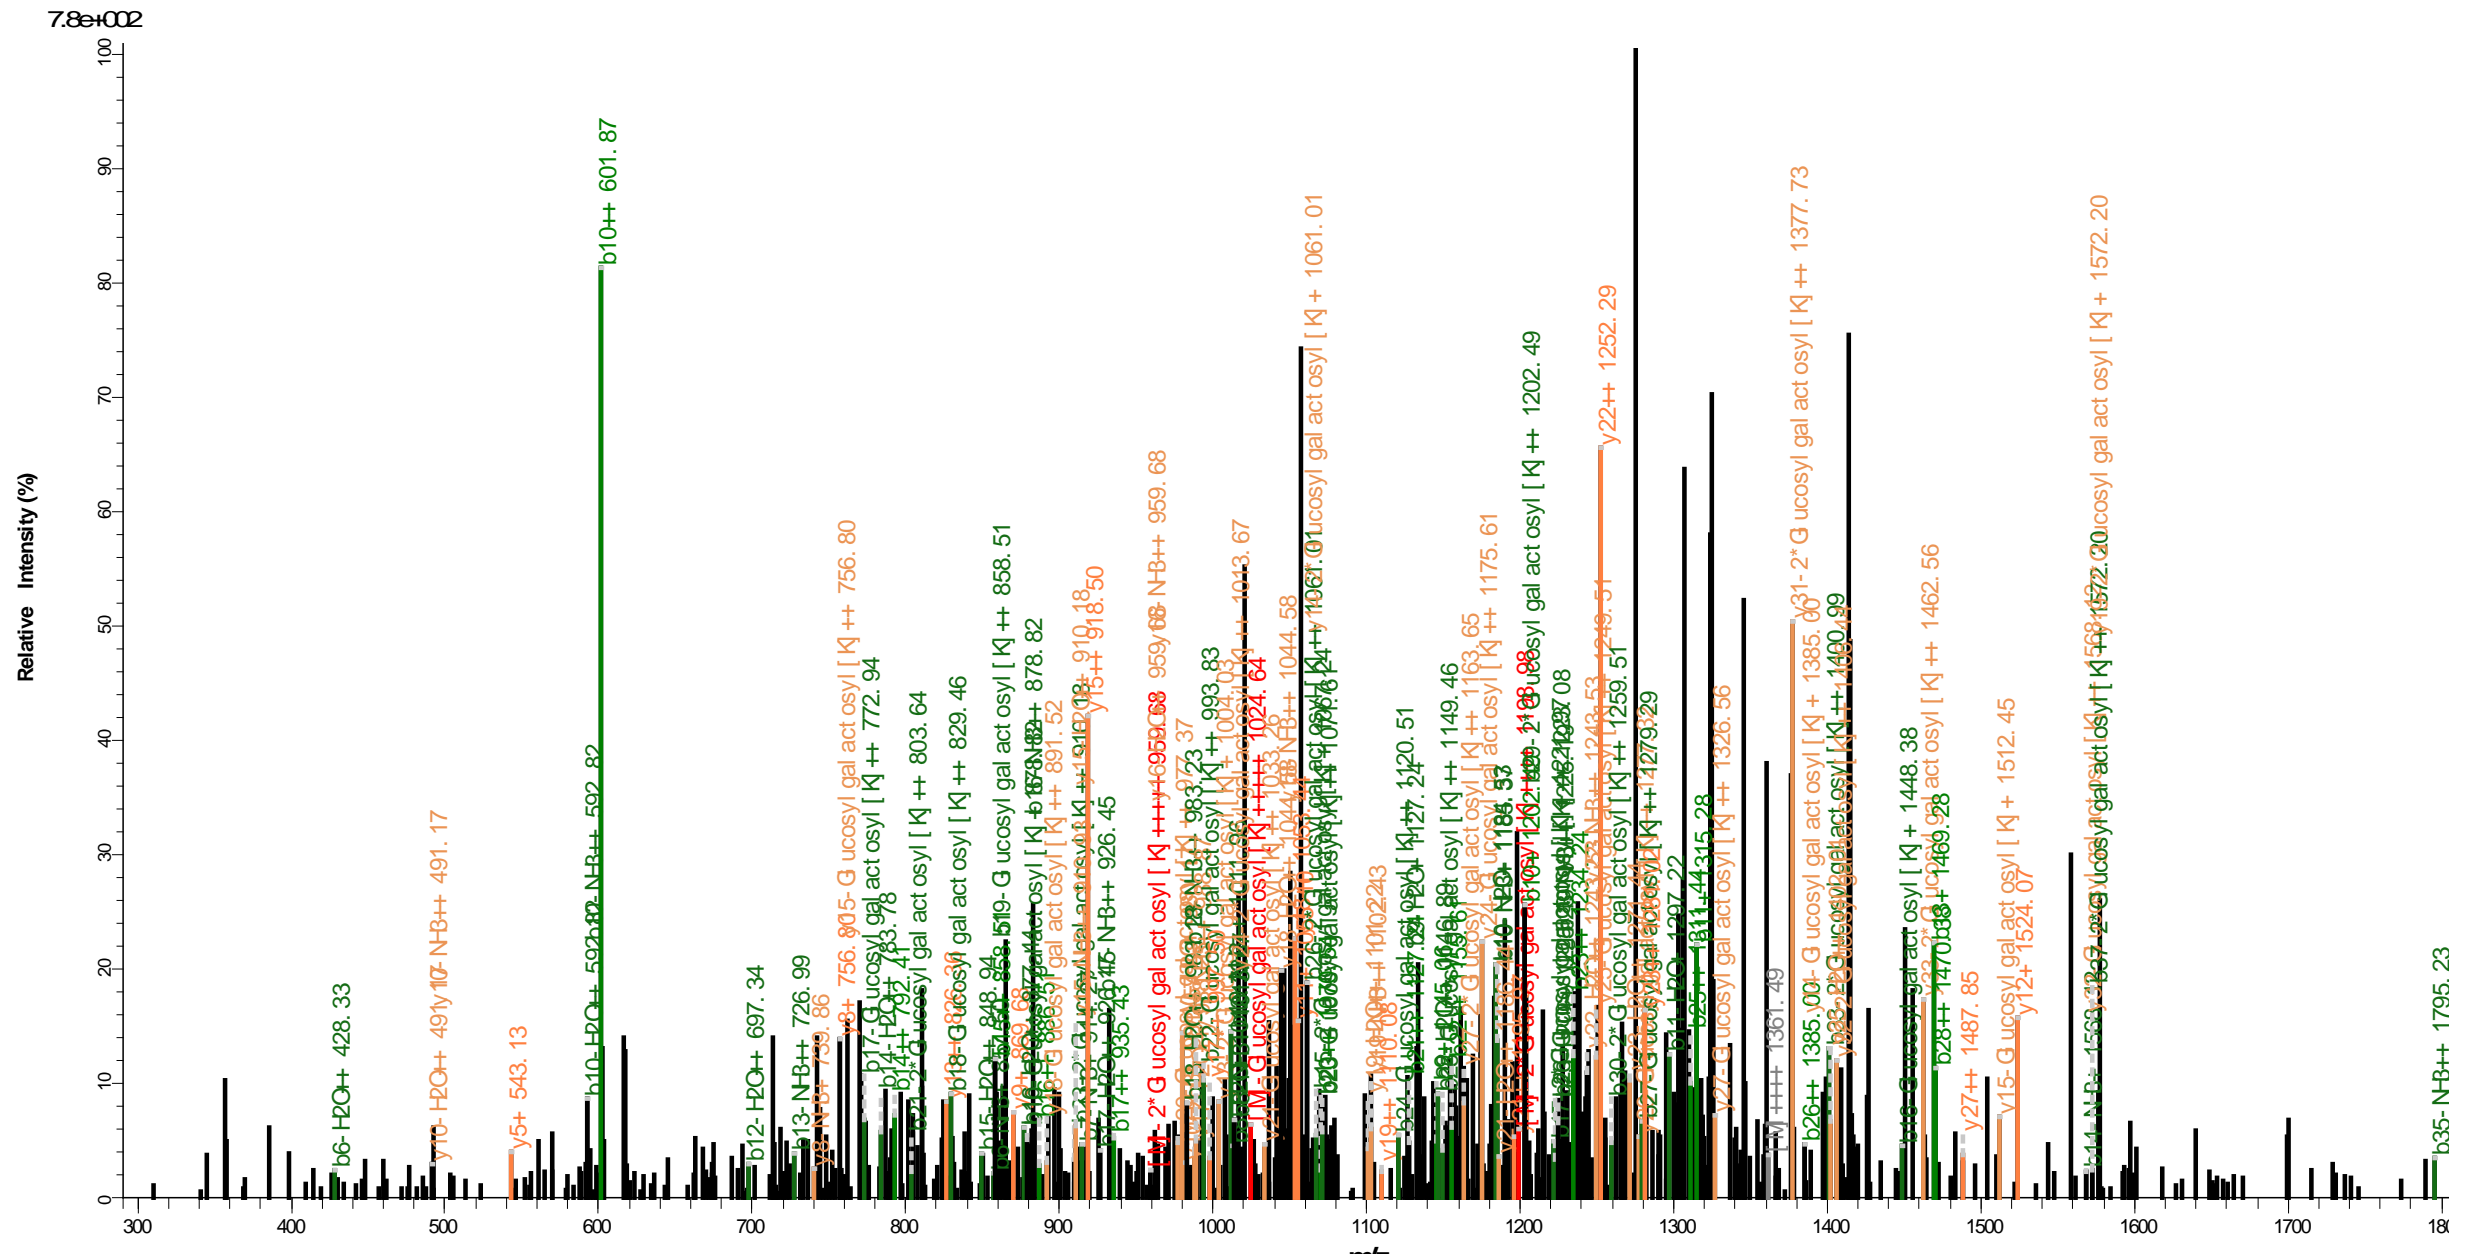



m/z = 1001.8720 charge = +5

PSM showing the identification of Glucosylgalactosyl-HyK<sup>742</sup>

Human col4a1 chain

698 G V D G L P G D M G P P<sub>+16</sub> G T P<sub>+16</sub> G R P<sub>+16</sub> G F N G L P<sub>+16</sub> G N P<sub>+16</sub> G V Q G Q K<sub>+16</sub> G E P G V G L P G L K<sub>+340</sub> G L P G L<sup>747</sup>

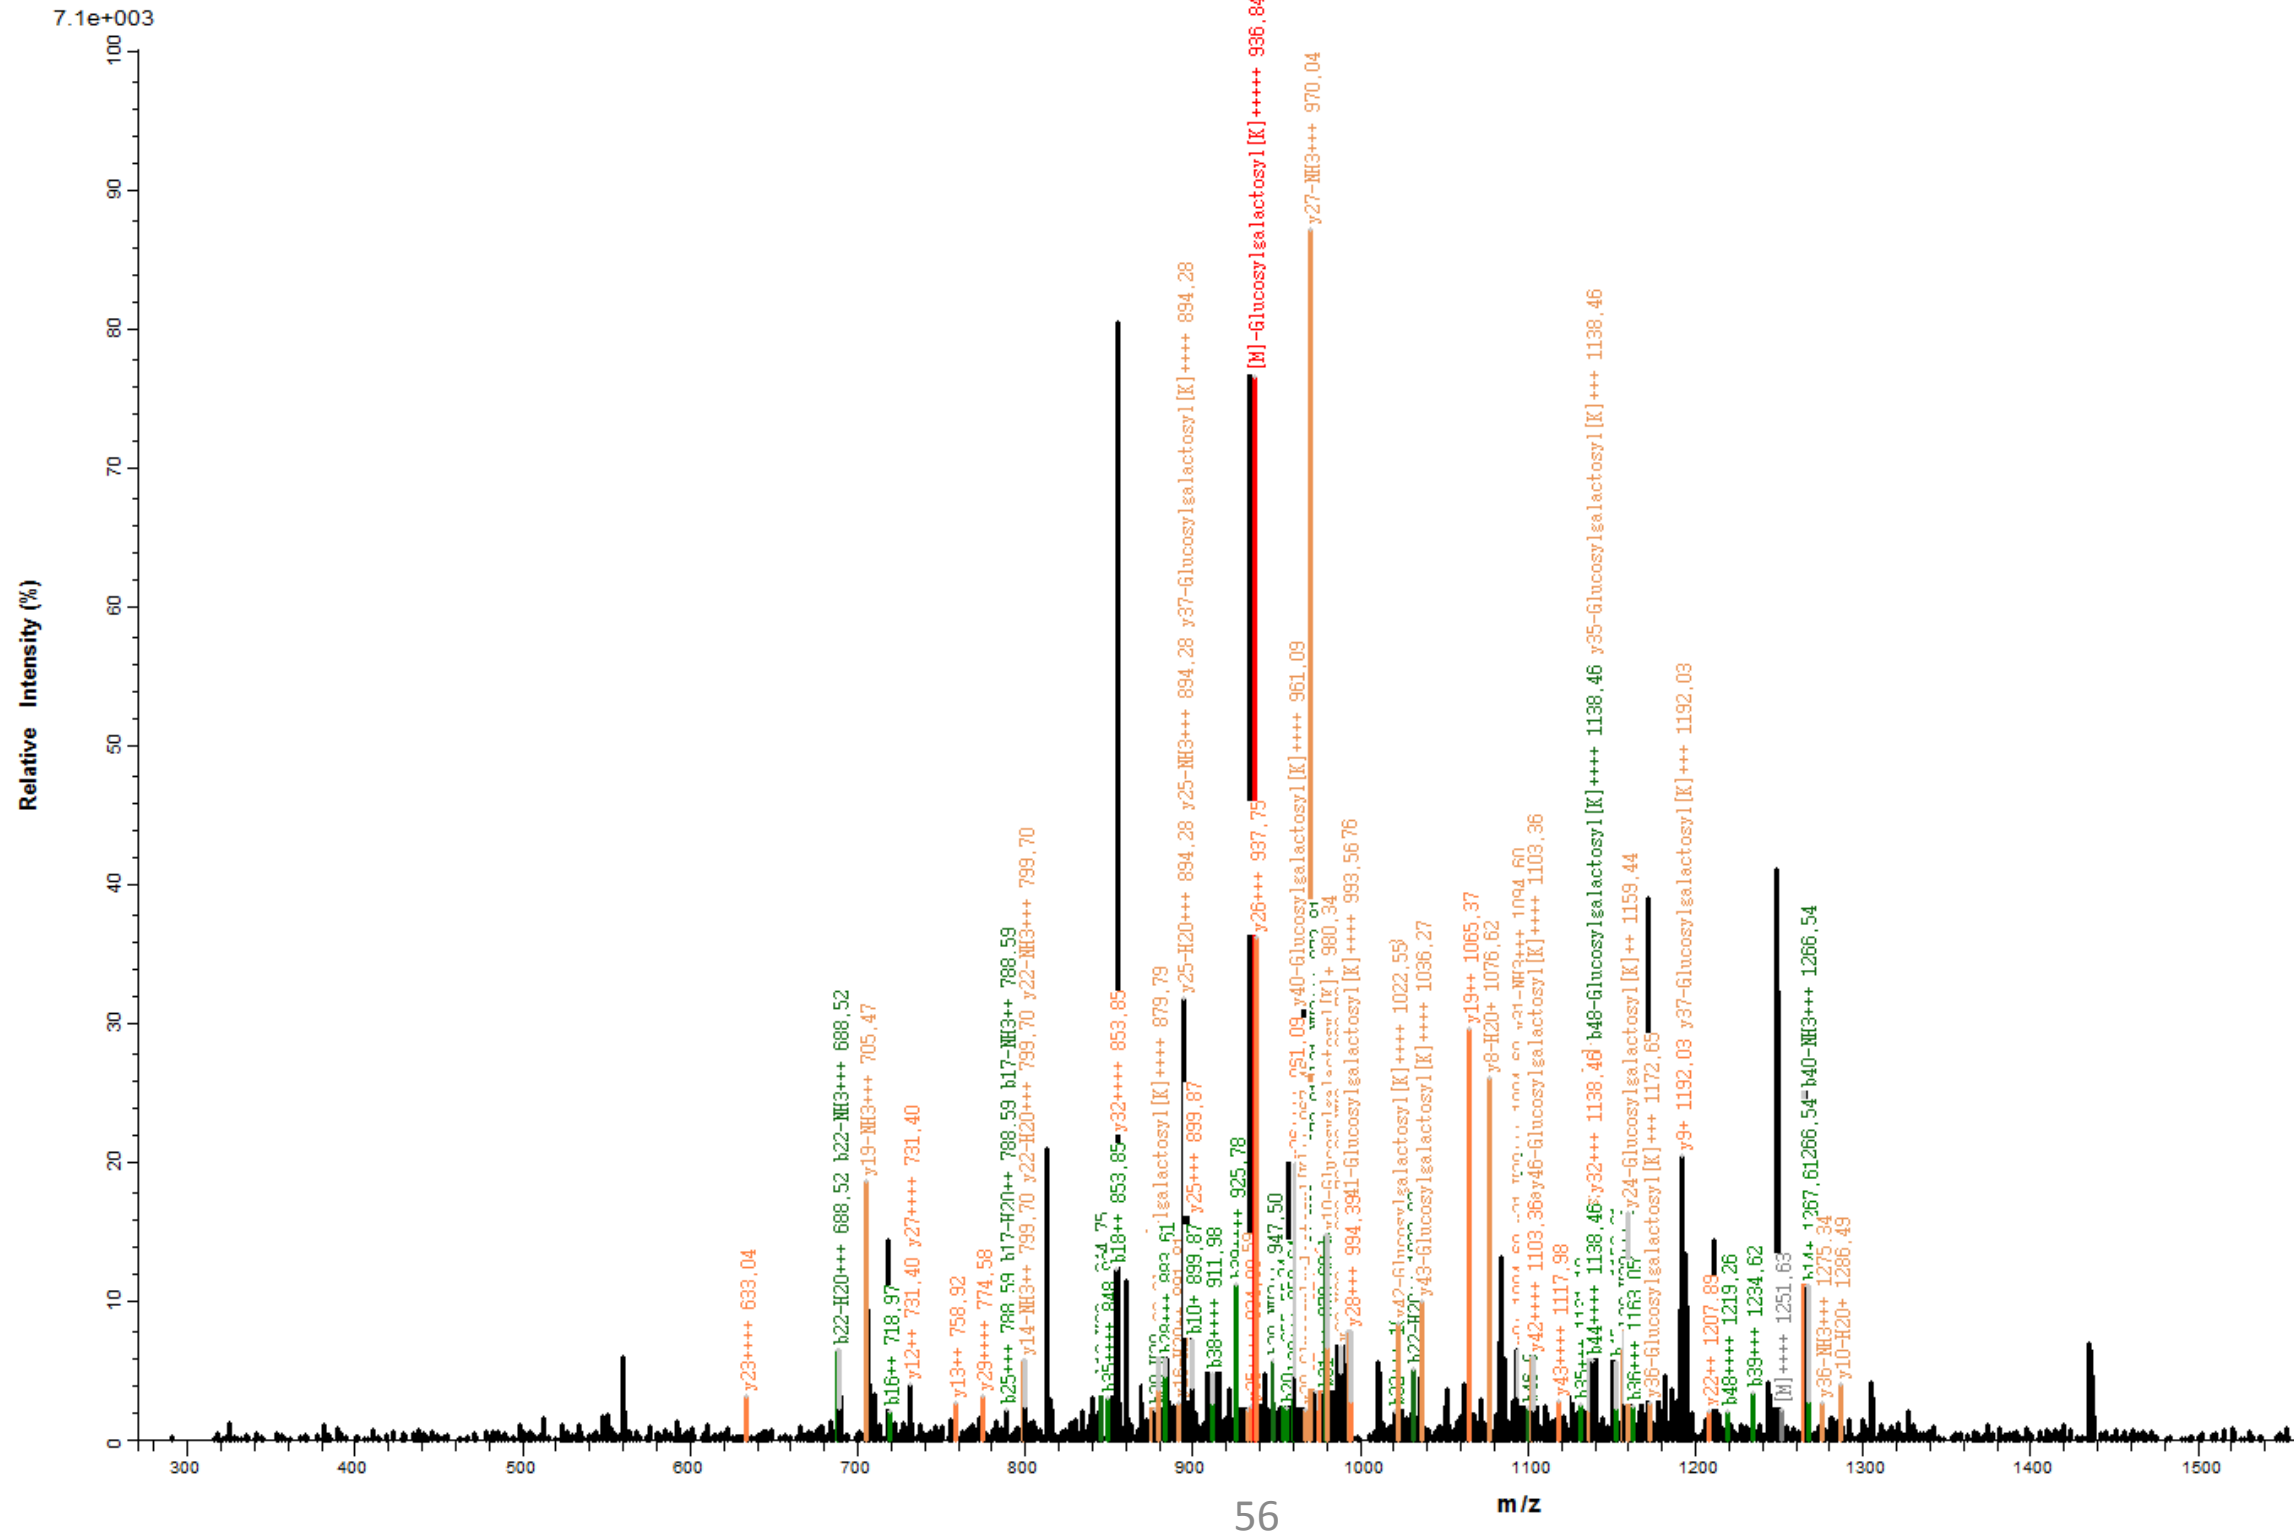

m/z = 568.6699 charge = +5

PSM showing the identification of Glucosylgalactosyl-HyK<sup>757</sup>

Human col4a1 chain

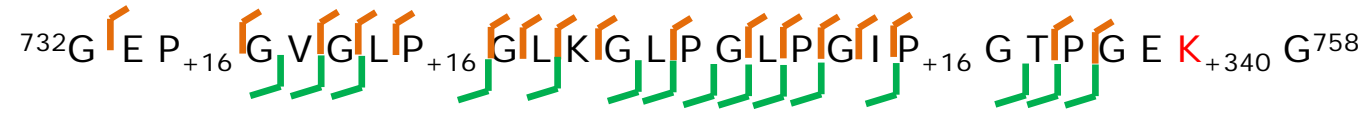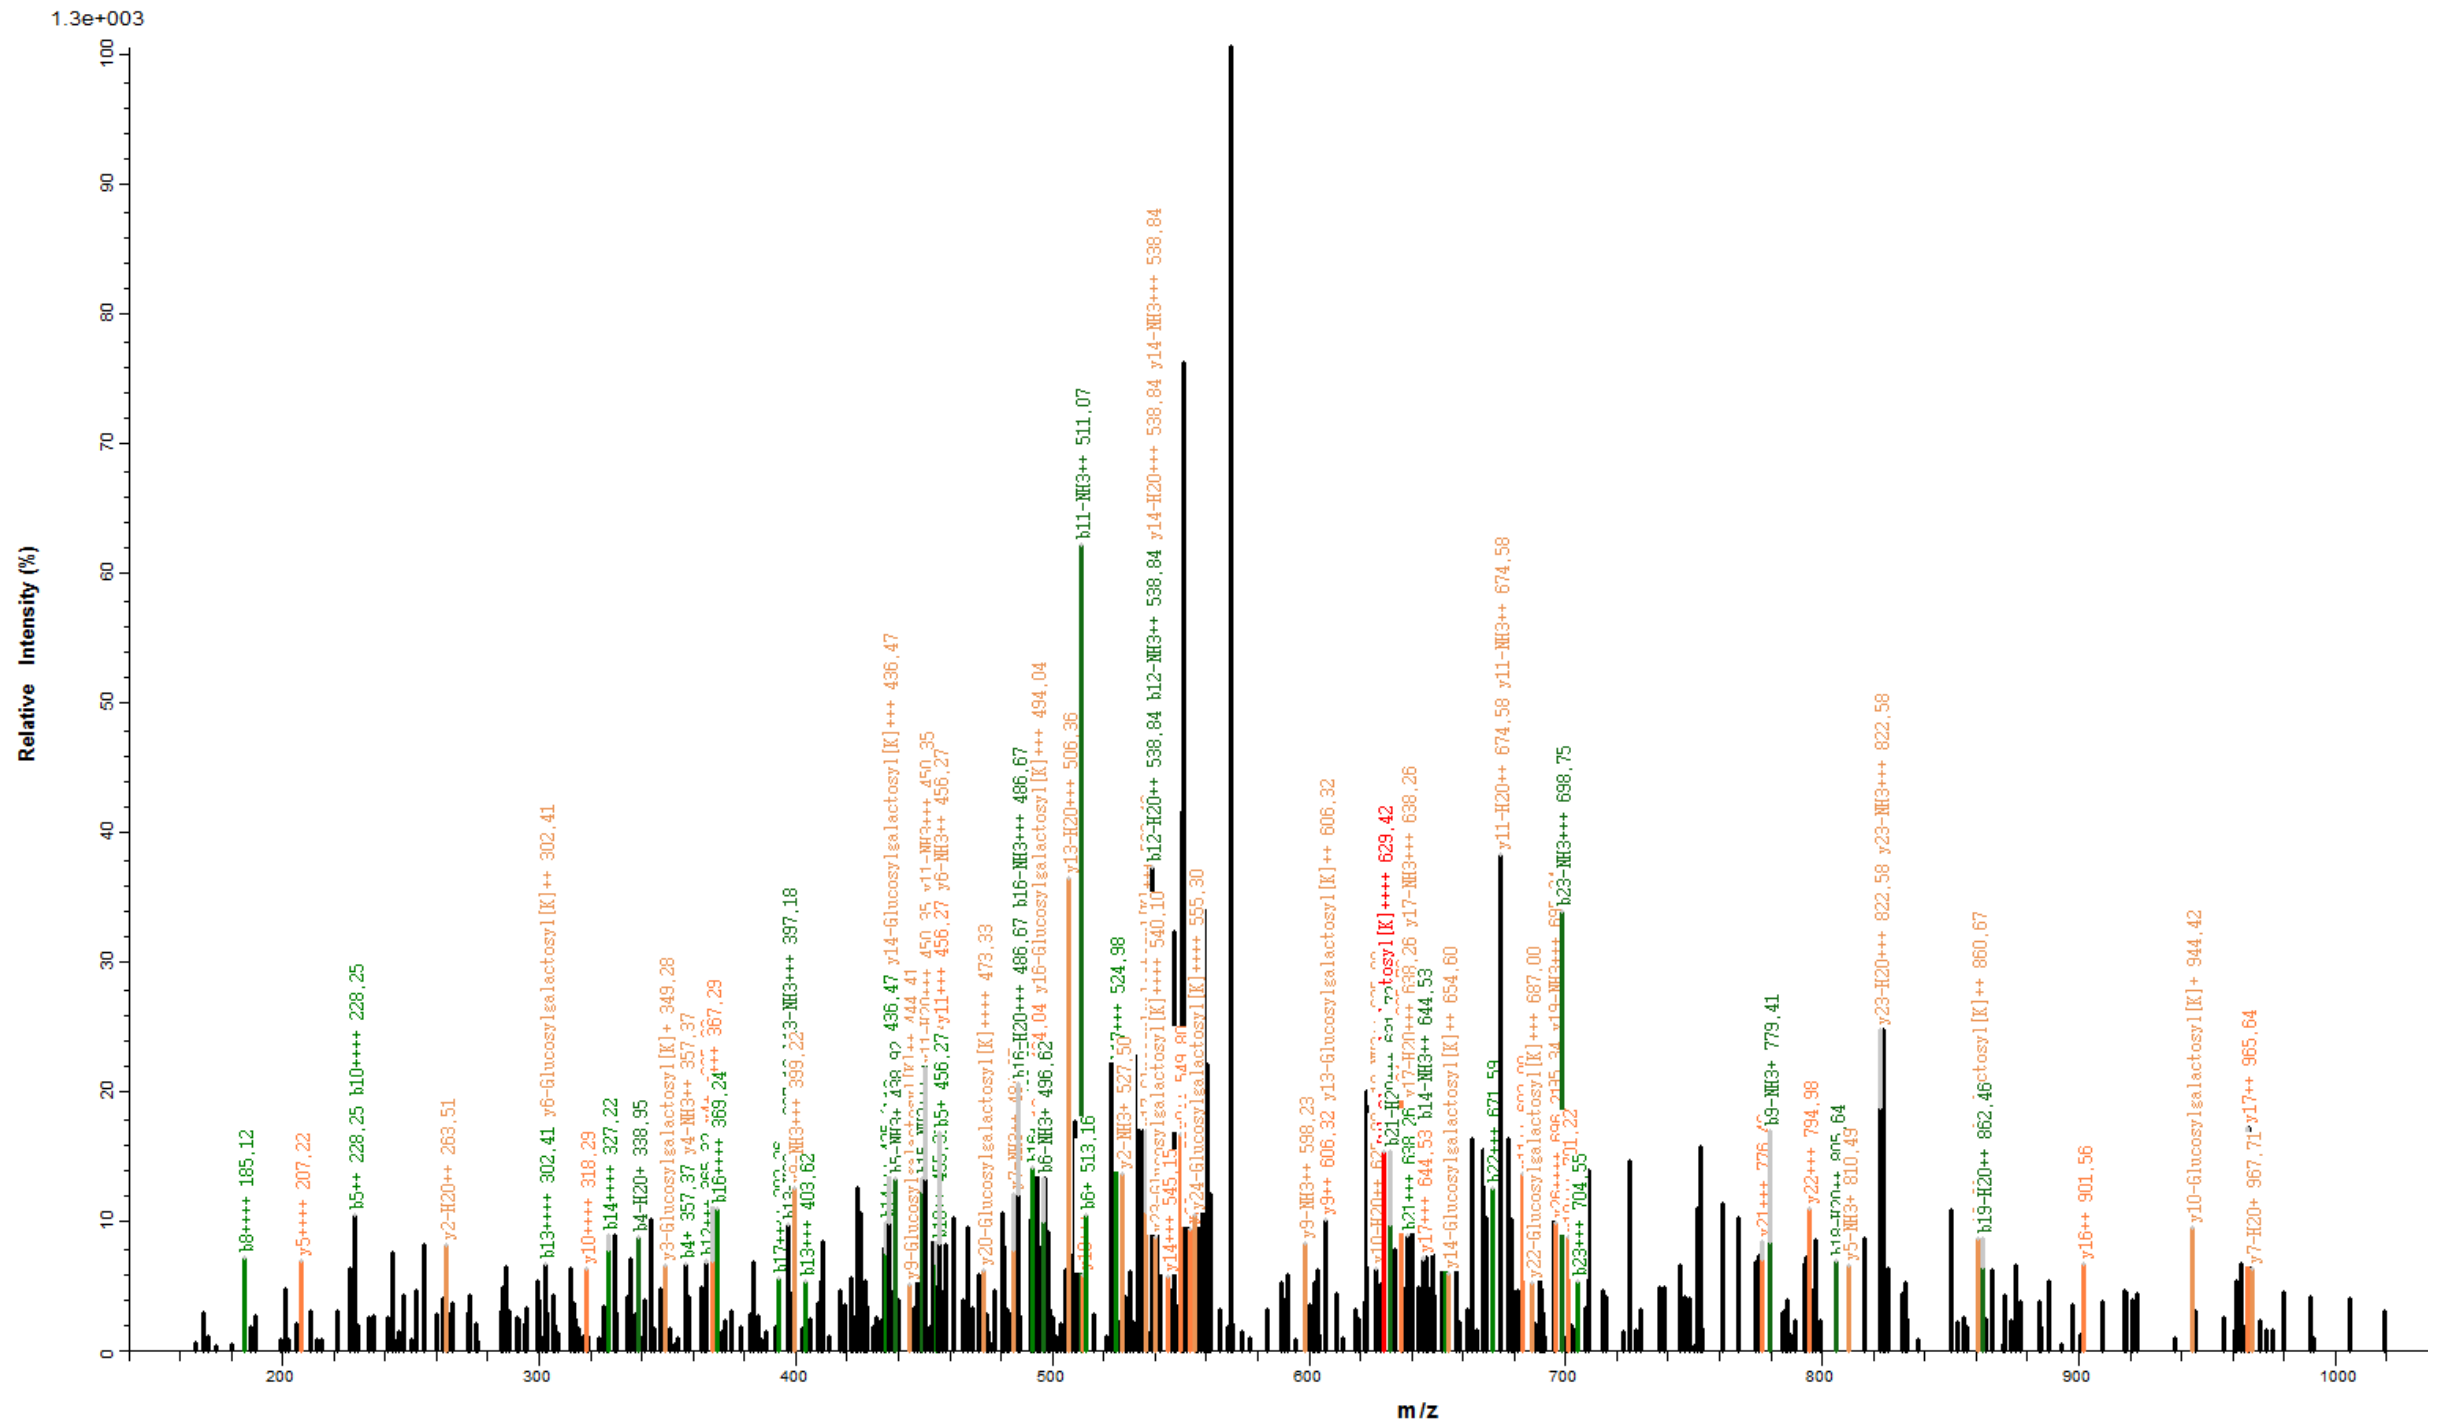

m/z = 763.3694 charge = +3

PSM showing the identification of Glucosylgalactosyl-HyK<sup>825</sup>

Human col4a1 chain

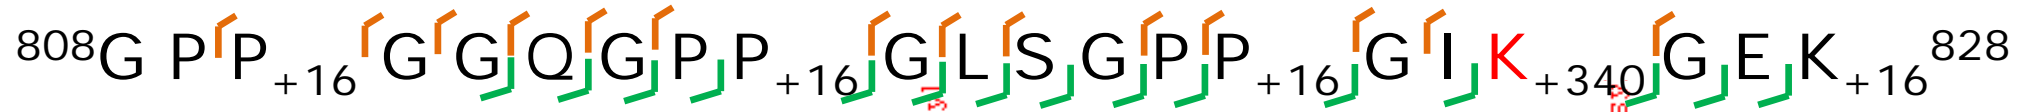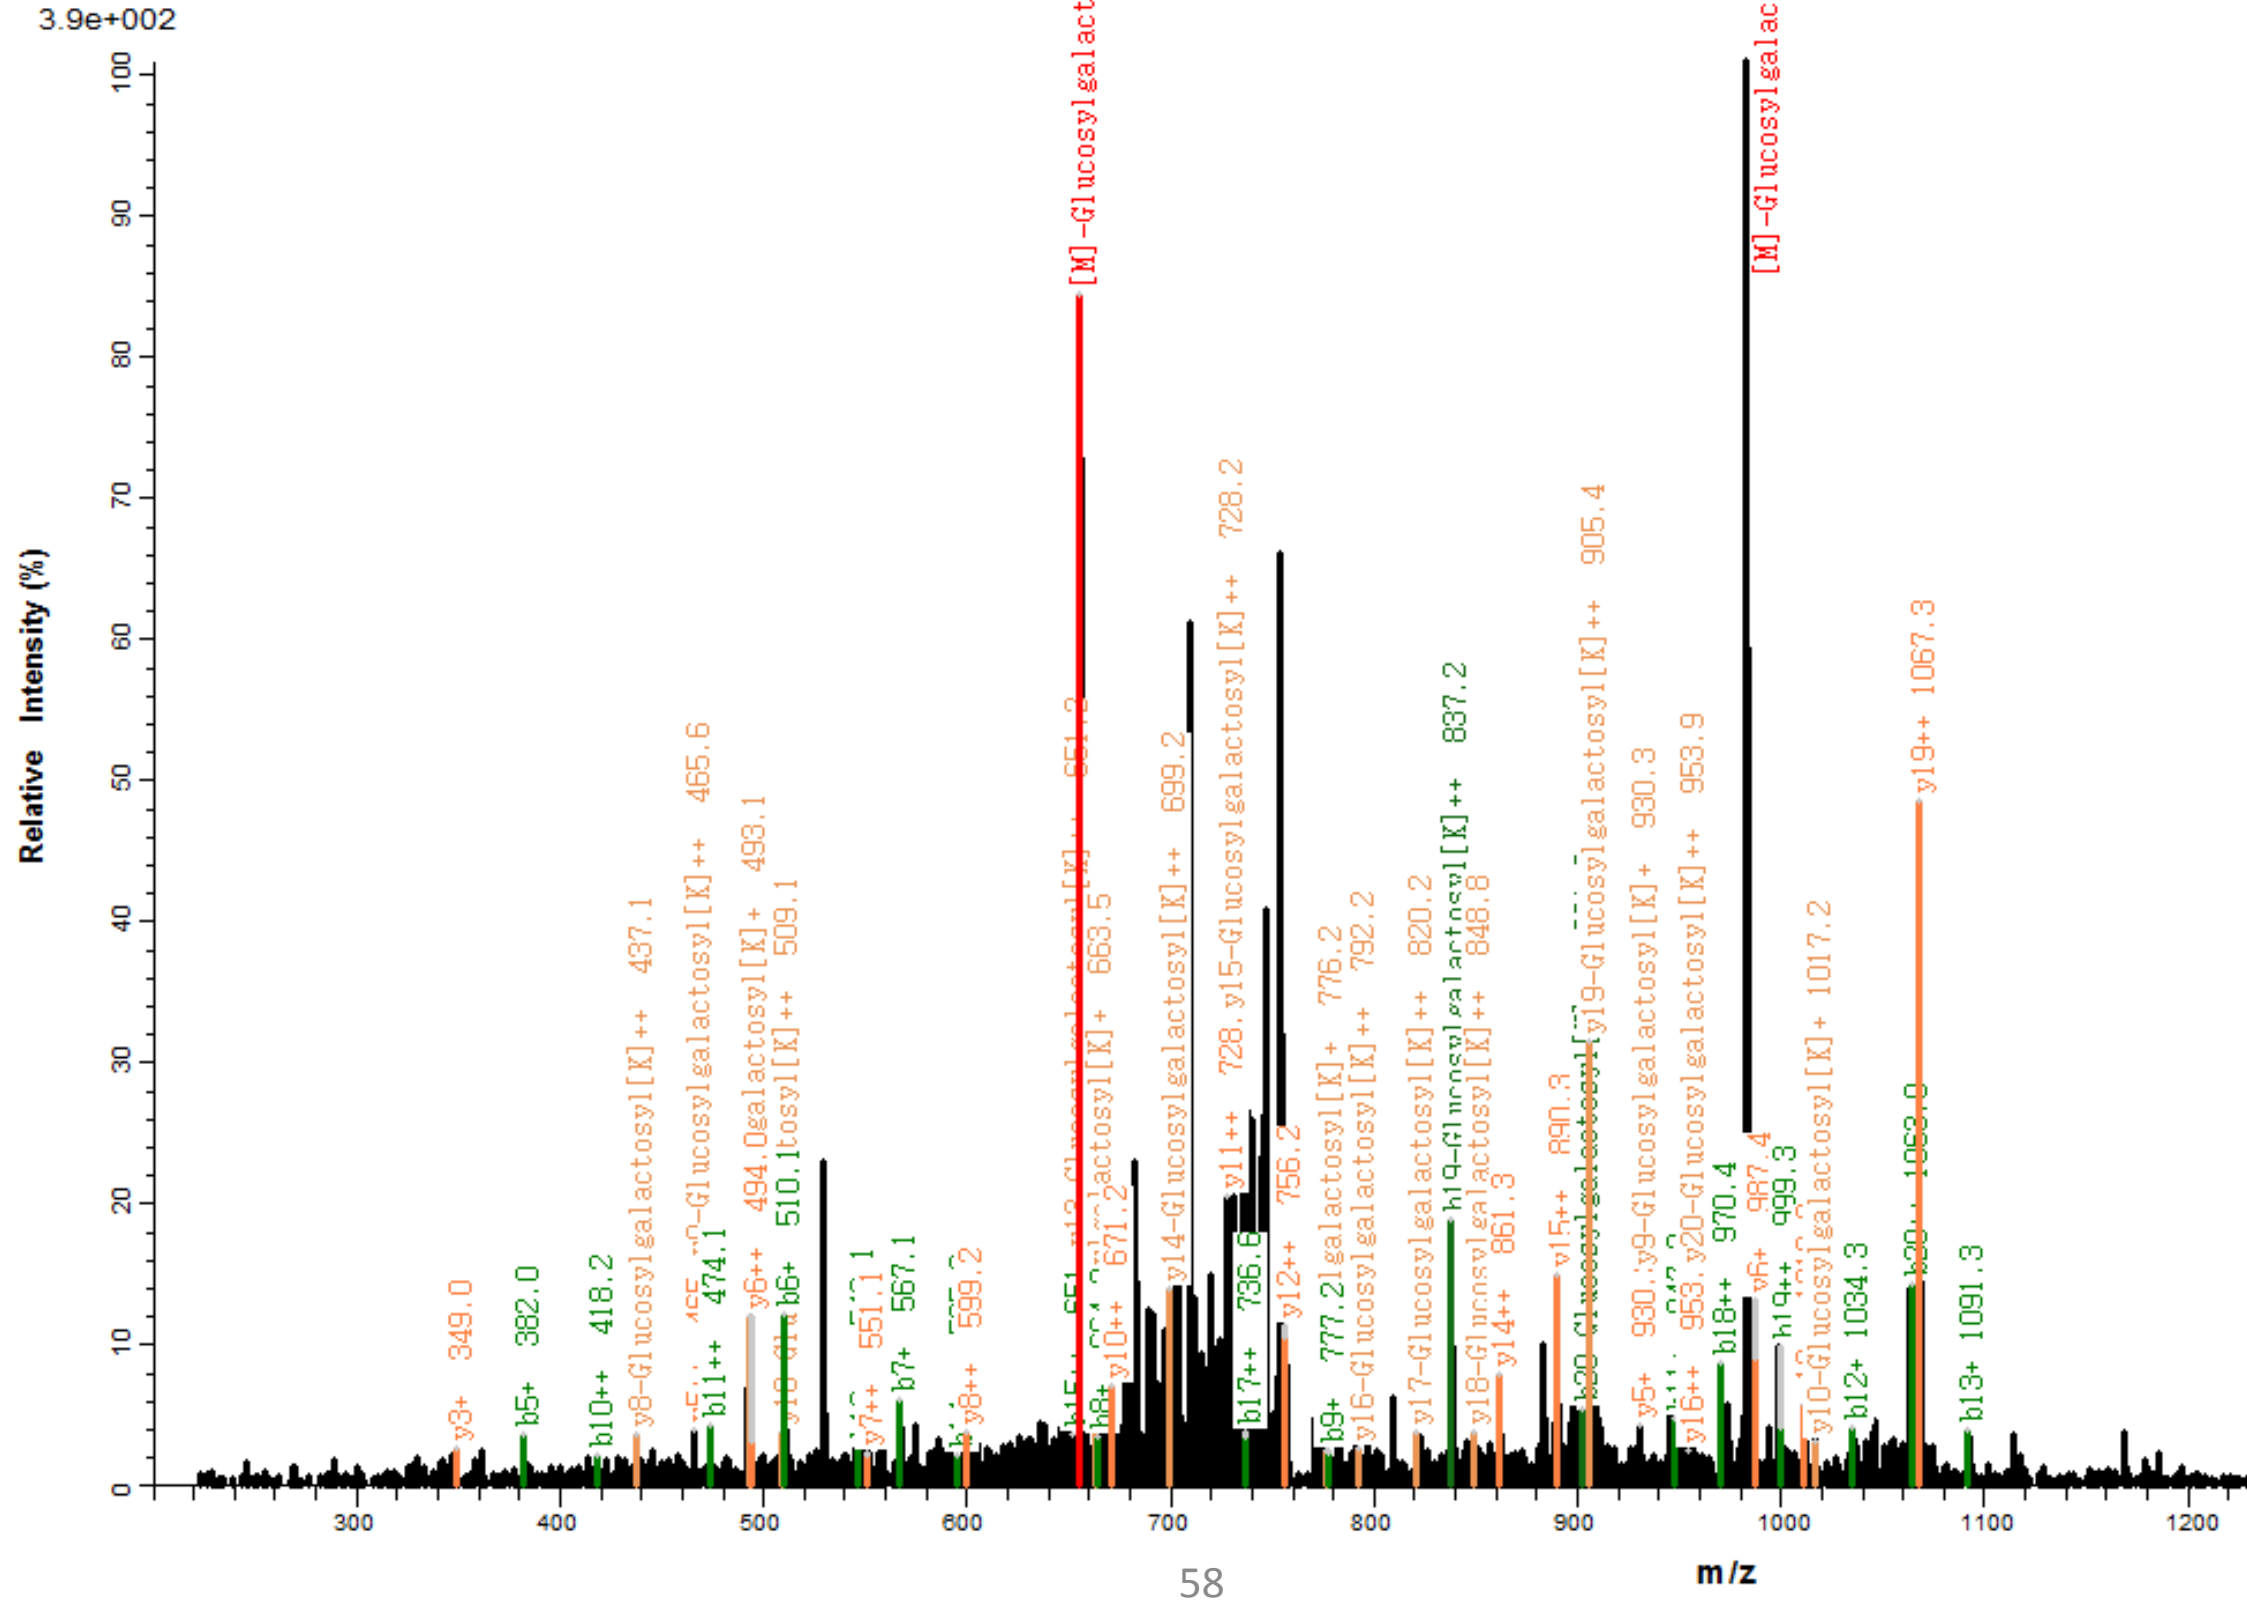

m/z = 969.05 charge = +3

PSM showing the identification of Glucosylgalactosyl-HyK<sup>1025</sup>

Human col4a1 chain

1011 G S V G G M G L P G T P G E K +340 G V P G I P G P Q G S P G L P +16 G D K +16 G A K +16 G E K +178 G Q A G P P +16 G I G<sup>1058</sup>

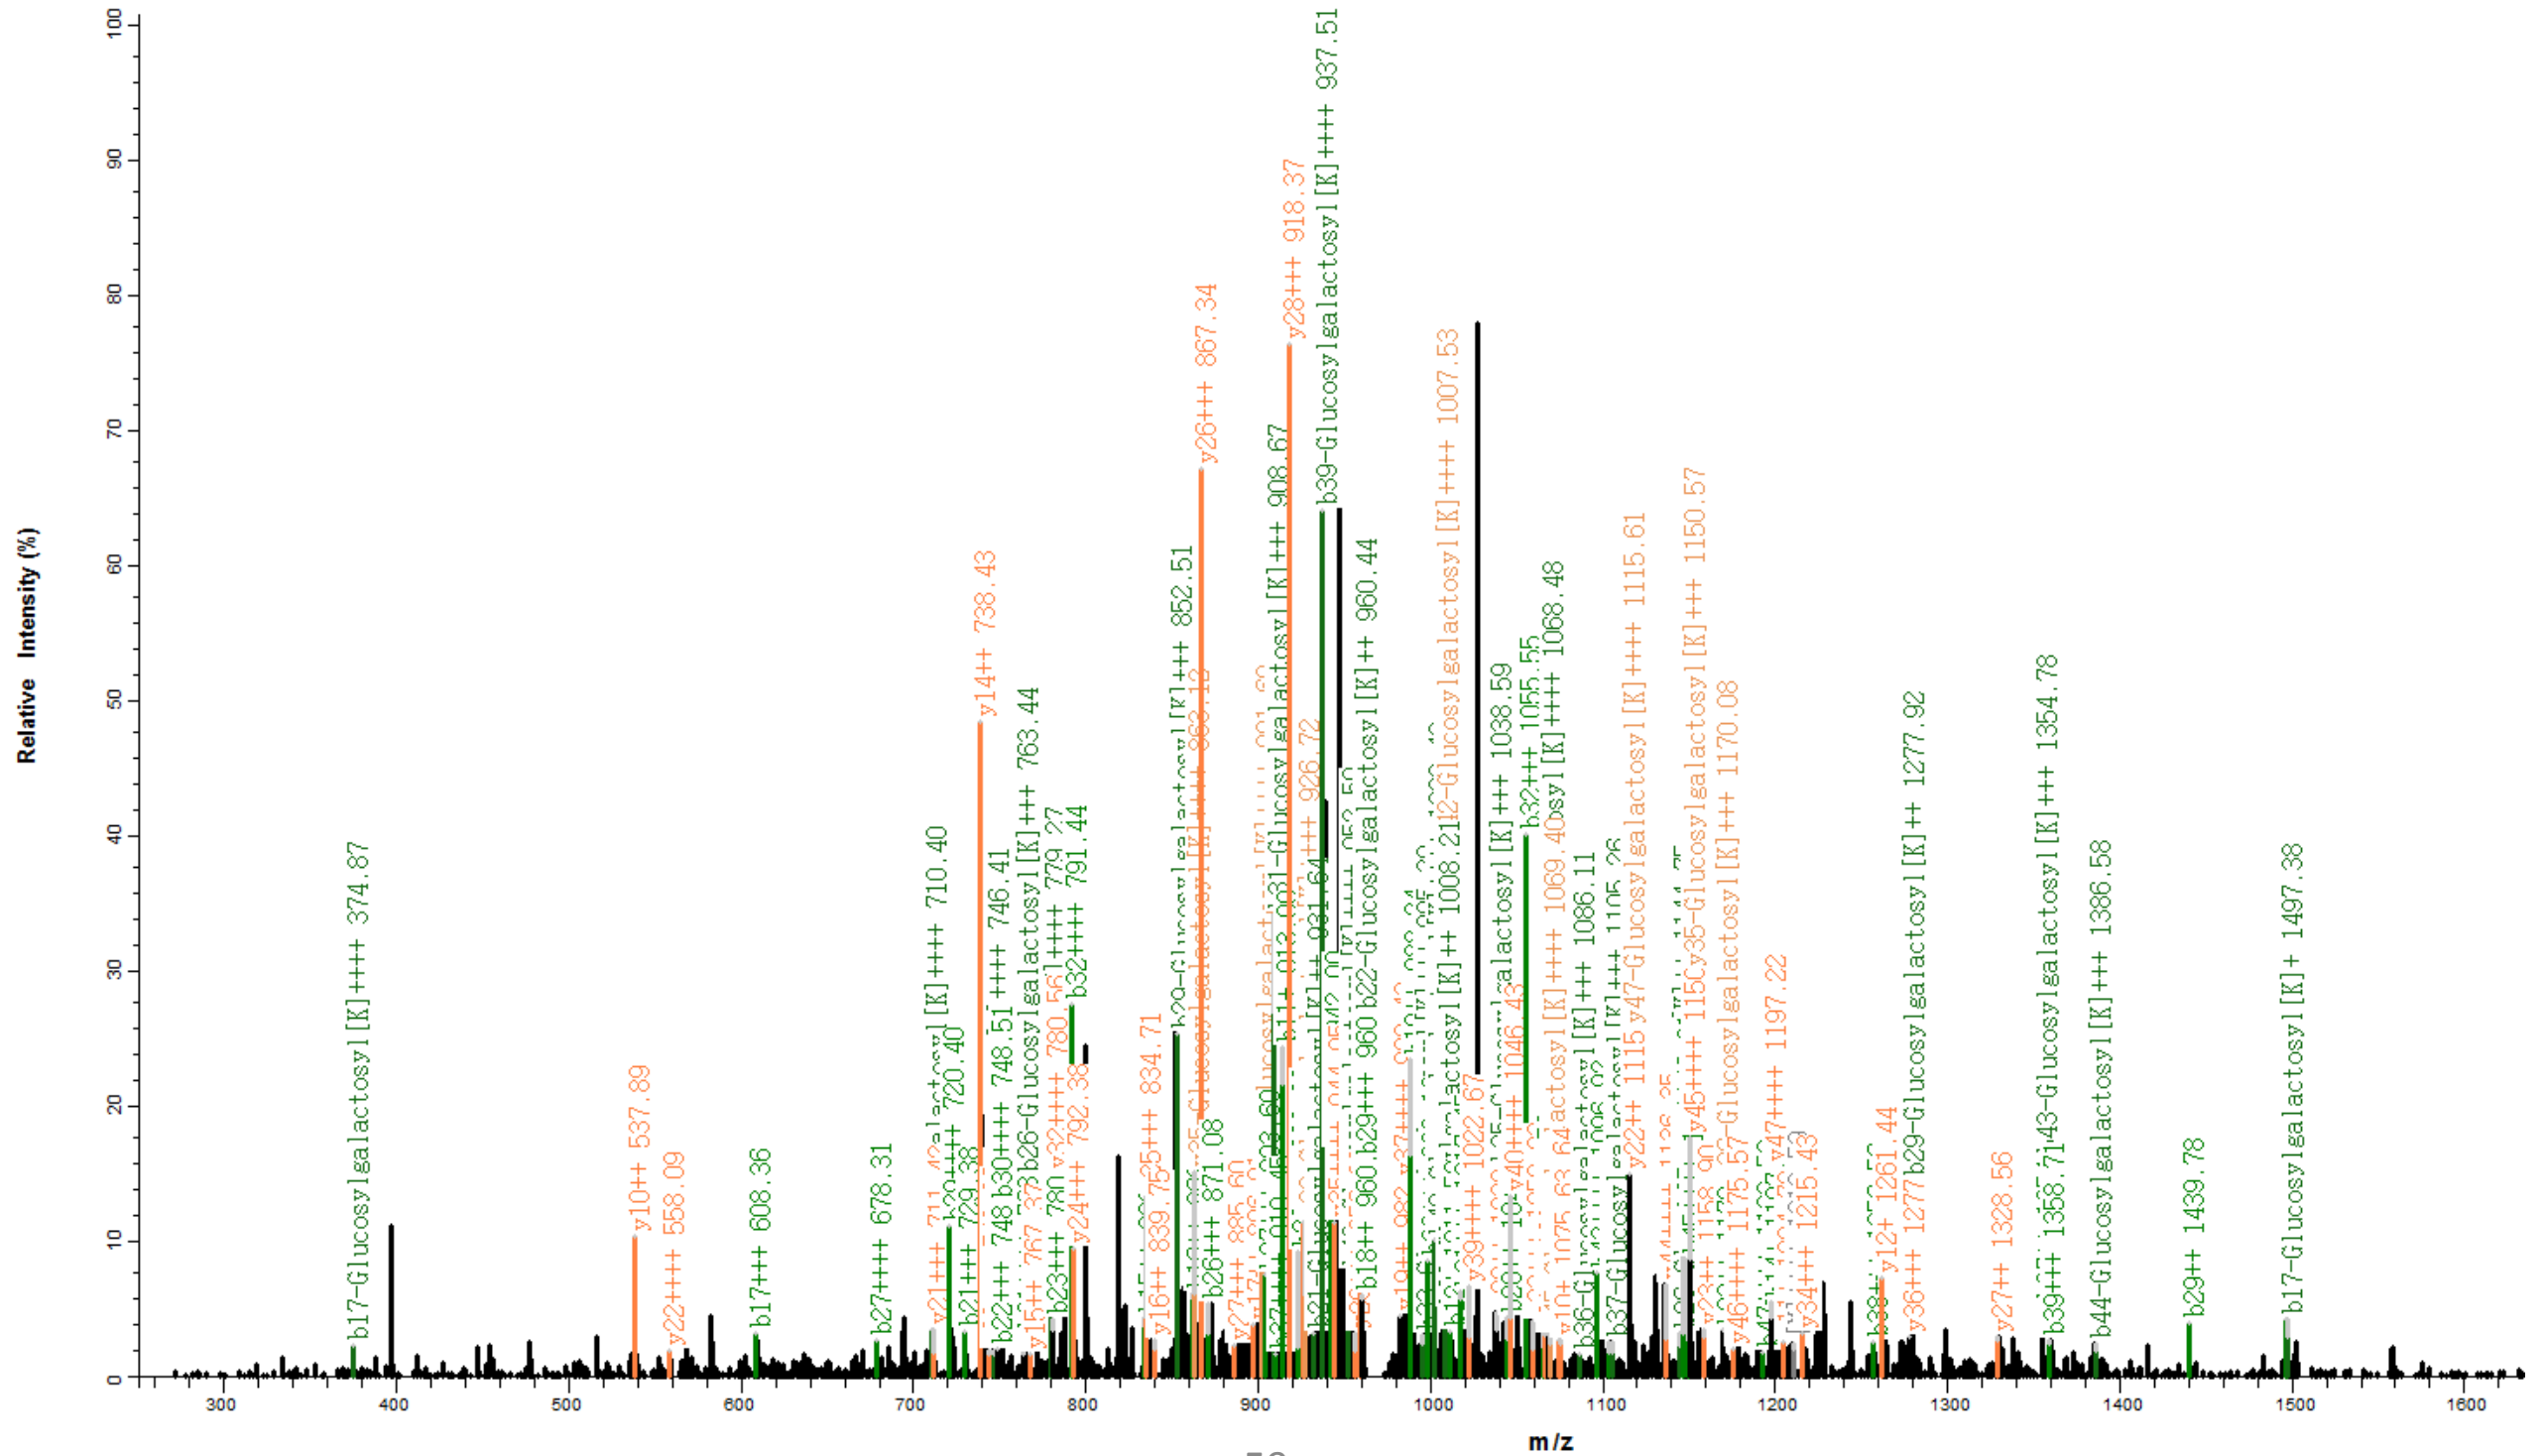

m/z = 906.4286 charge = +4

PSM showing the identification of Galactosyl-HyK<sup>1046</sup>

Human col4a1 chain

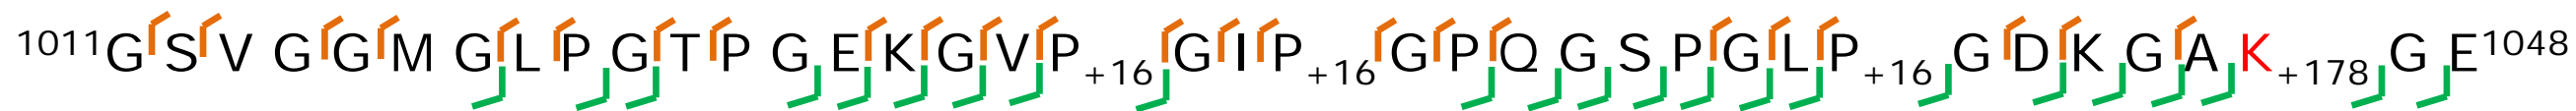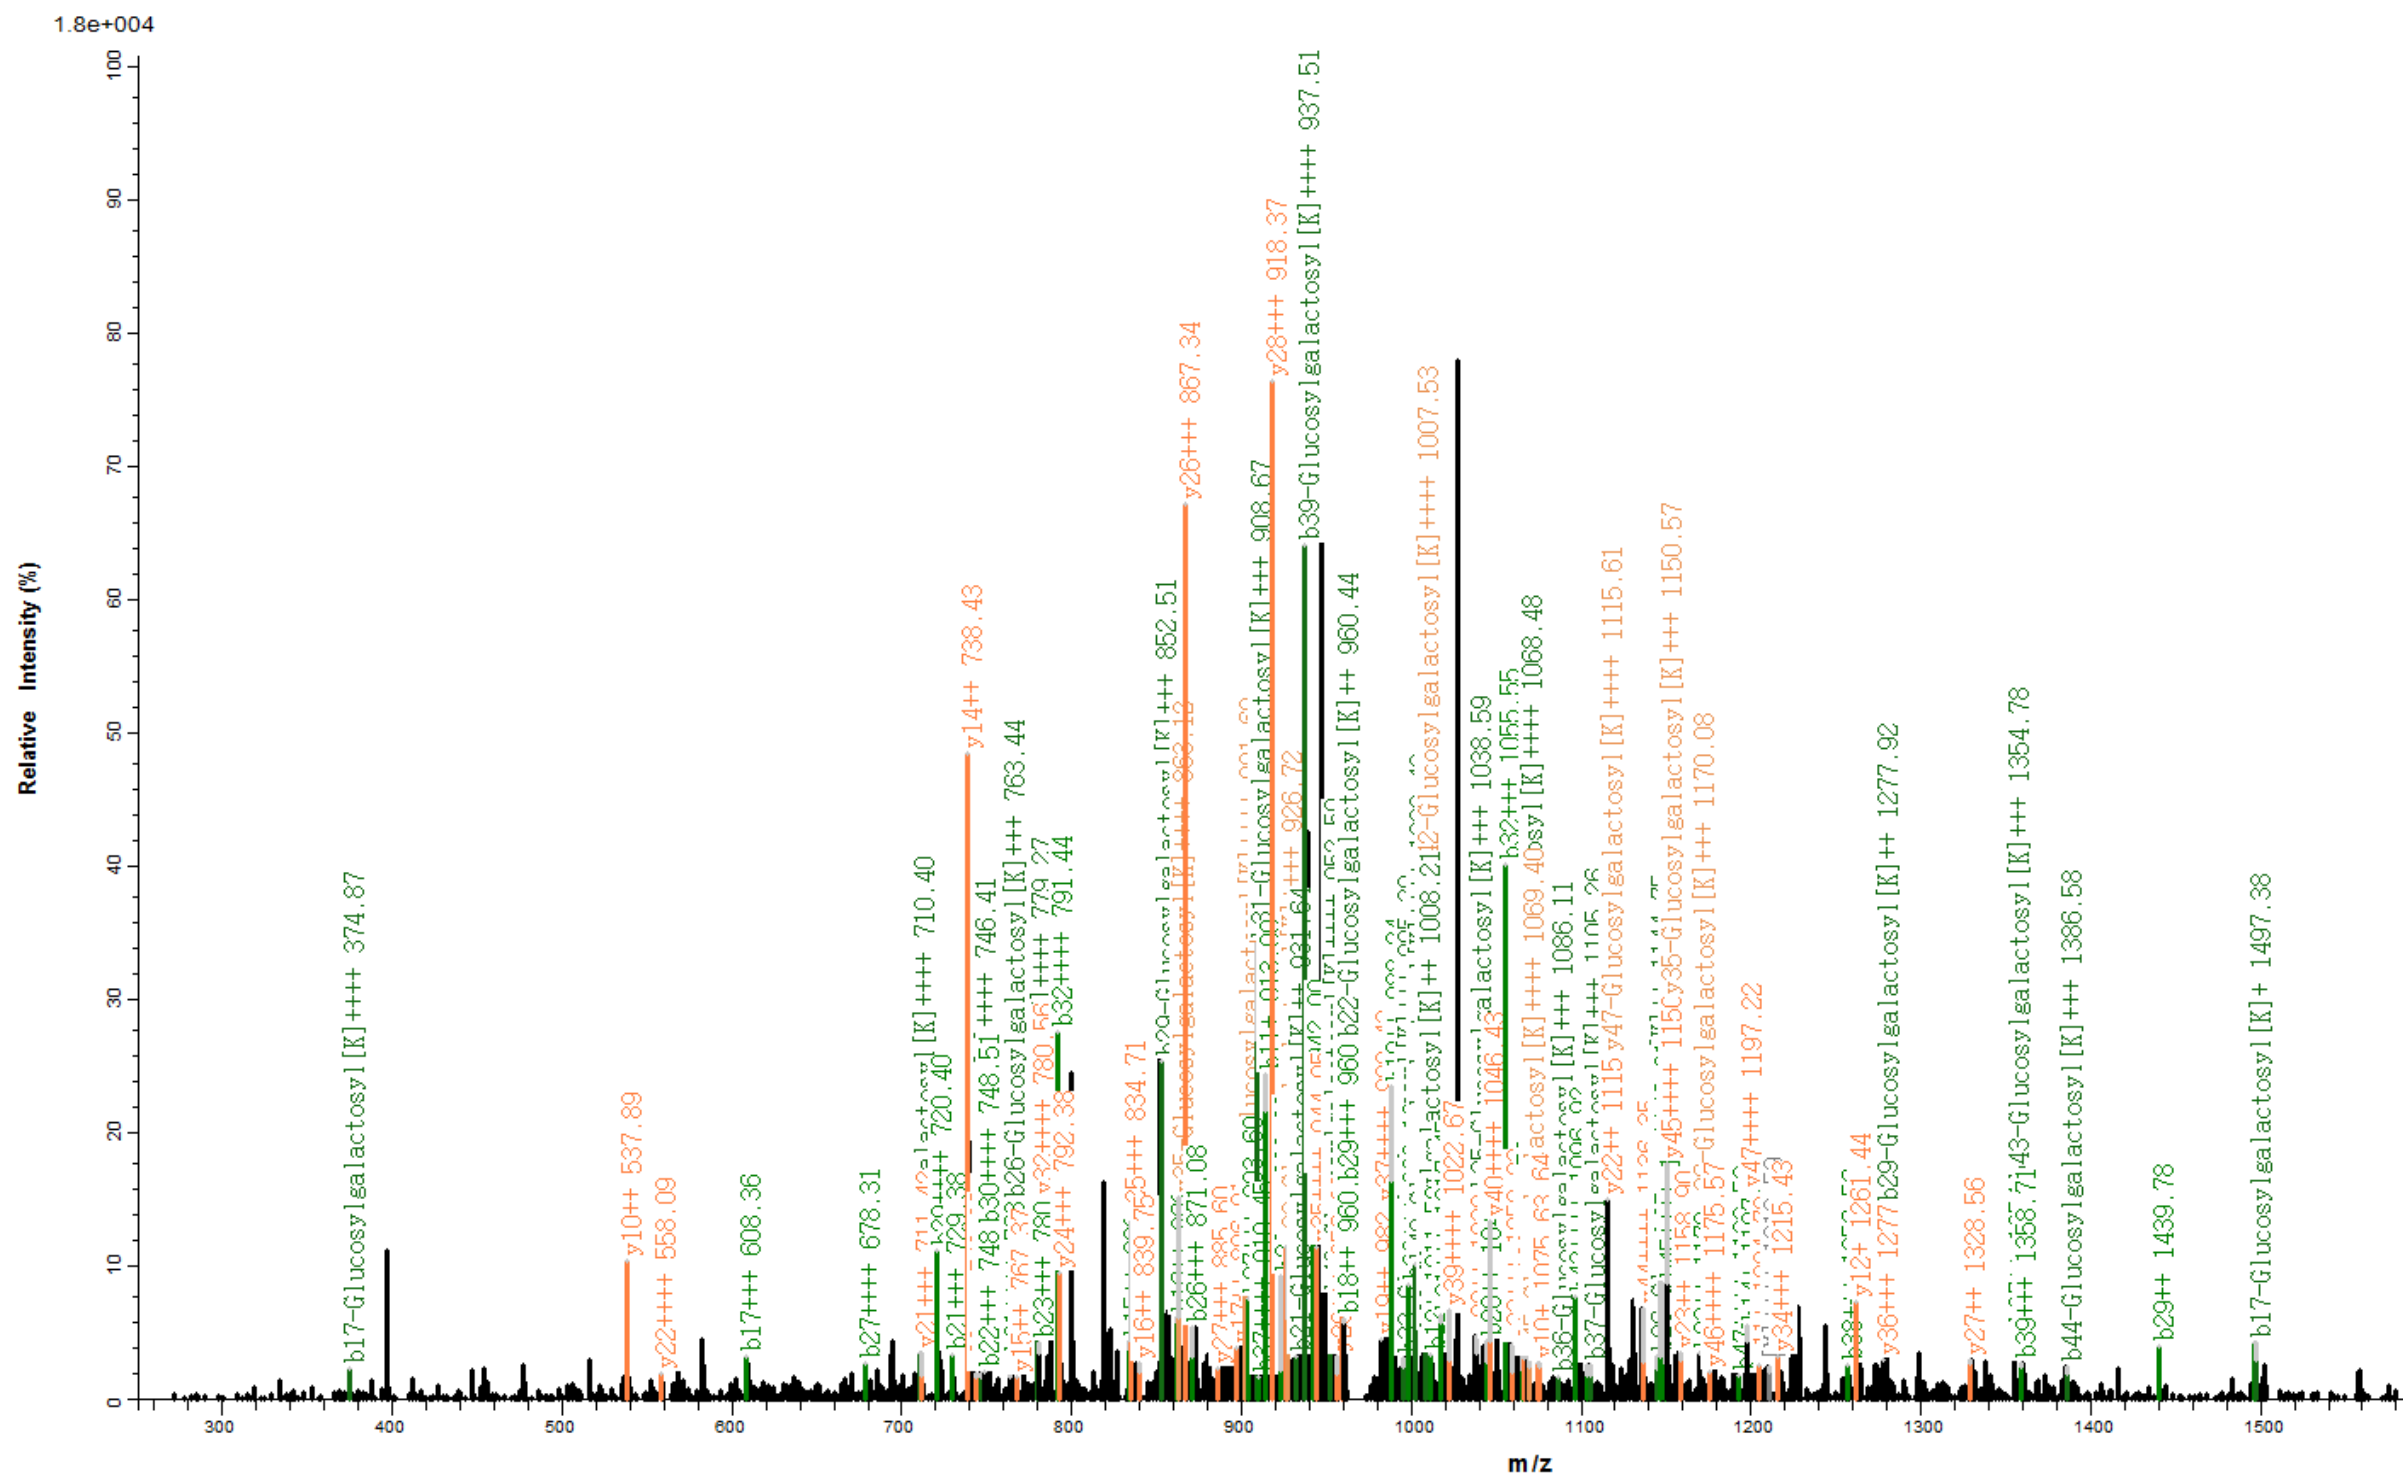

m/z = 659.3373 charge = +3

PSM showing the identification of Glucosylgalactosyl-HyK<sup>1049</sup>

Human col4a1 chain

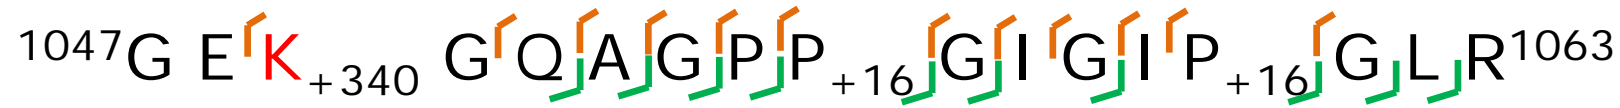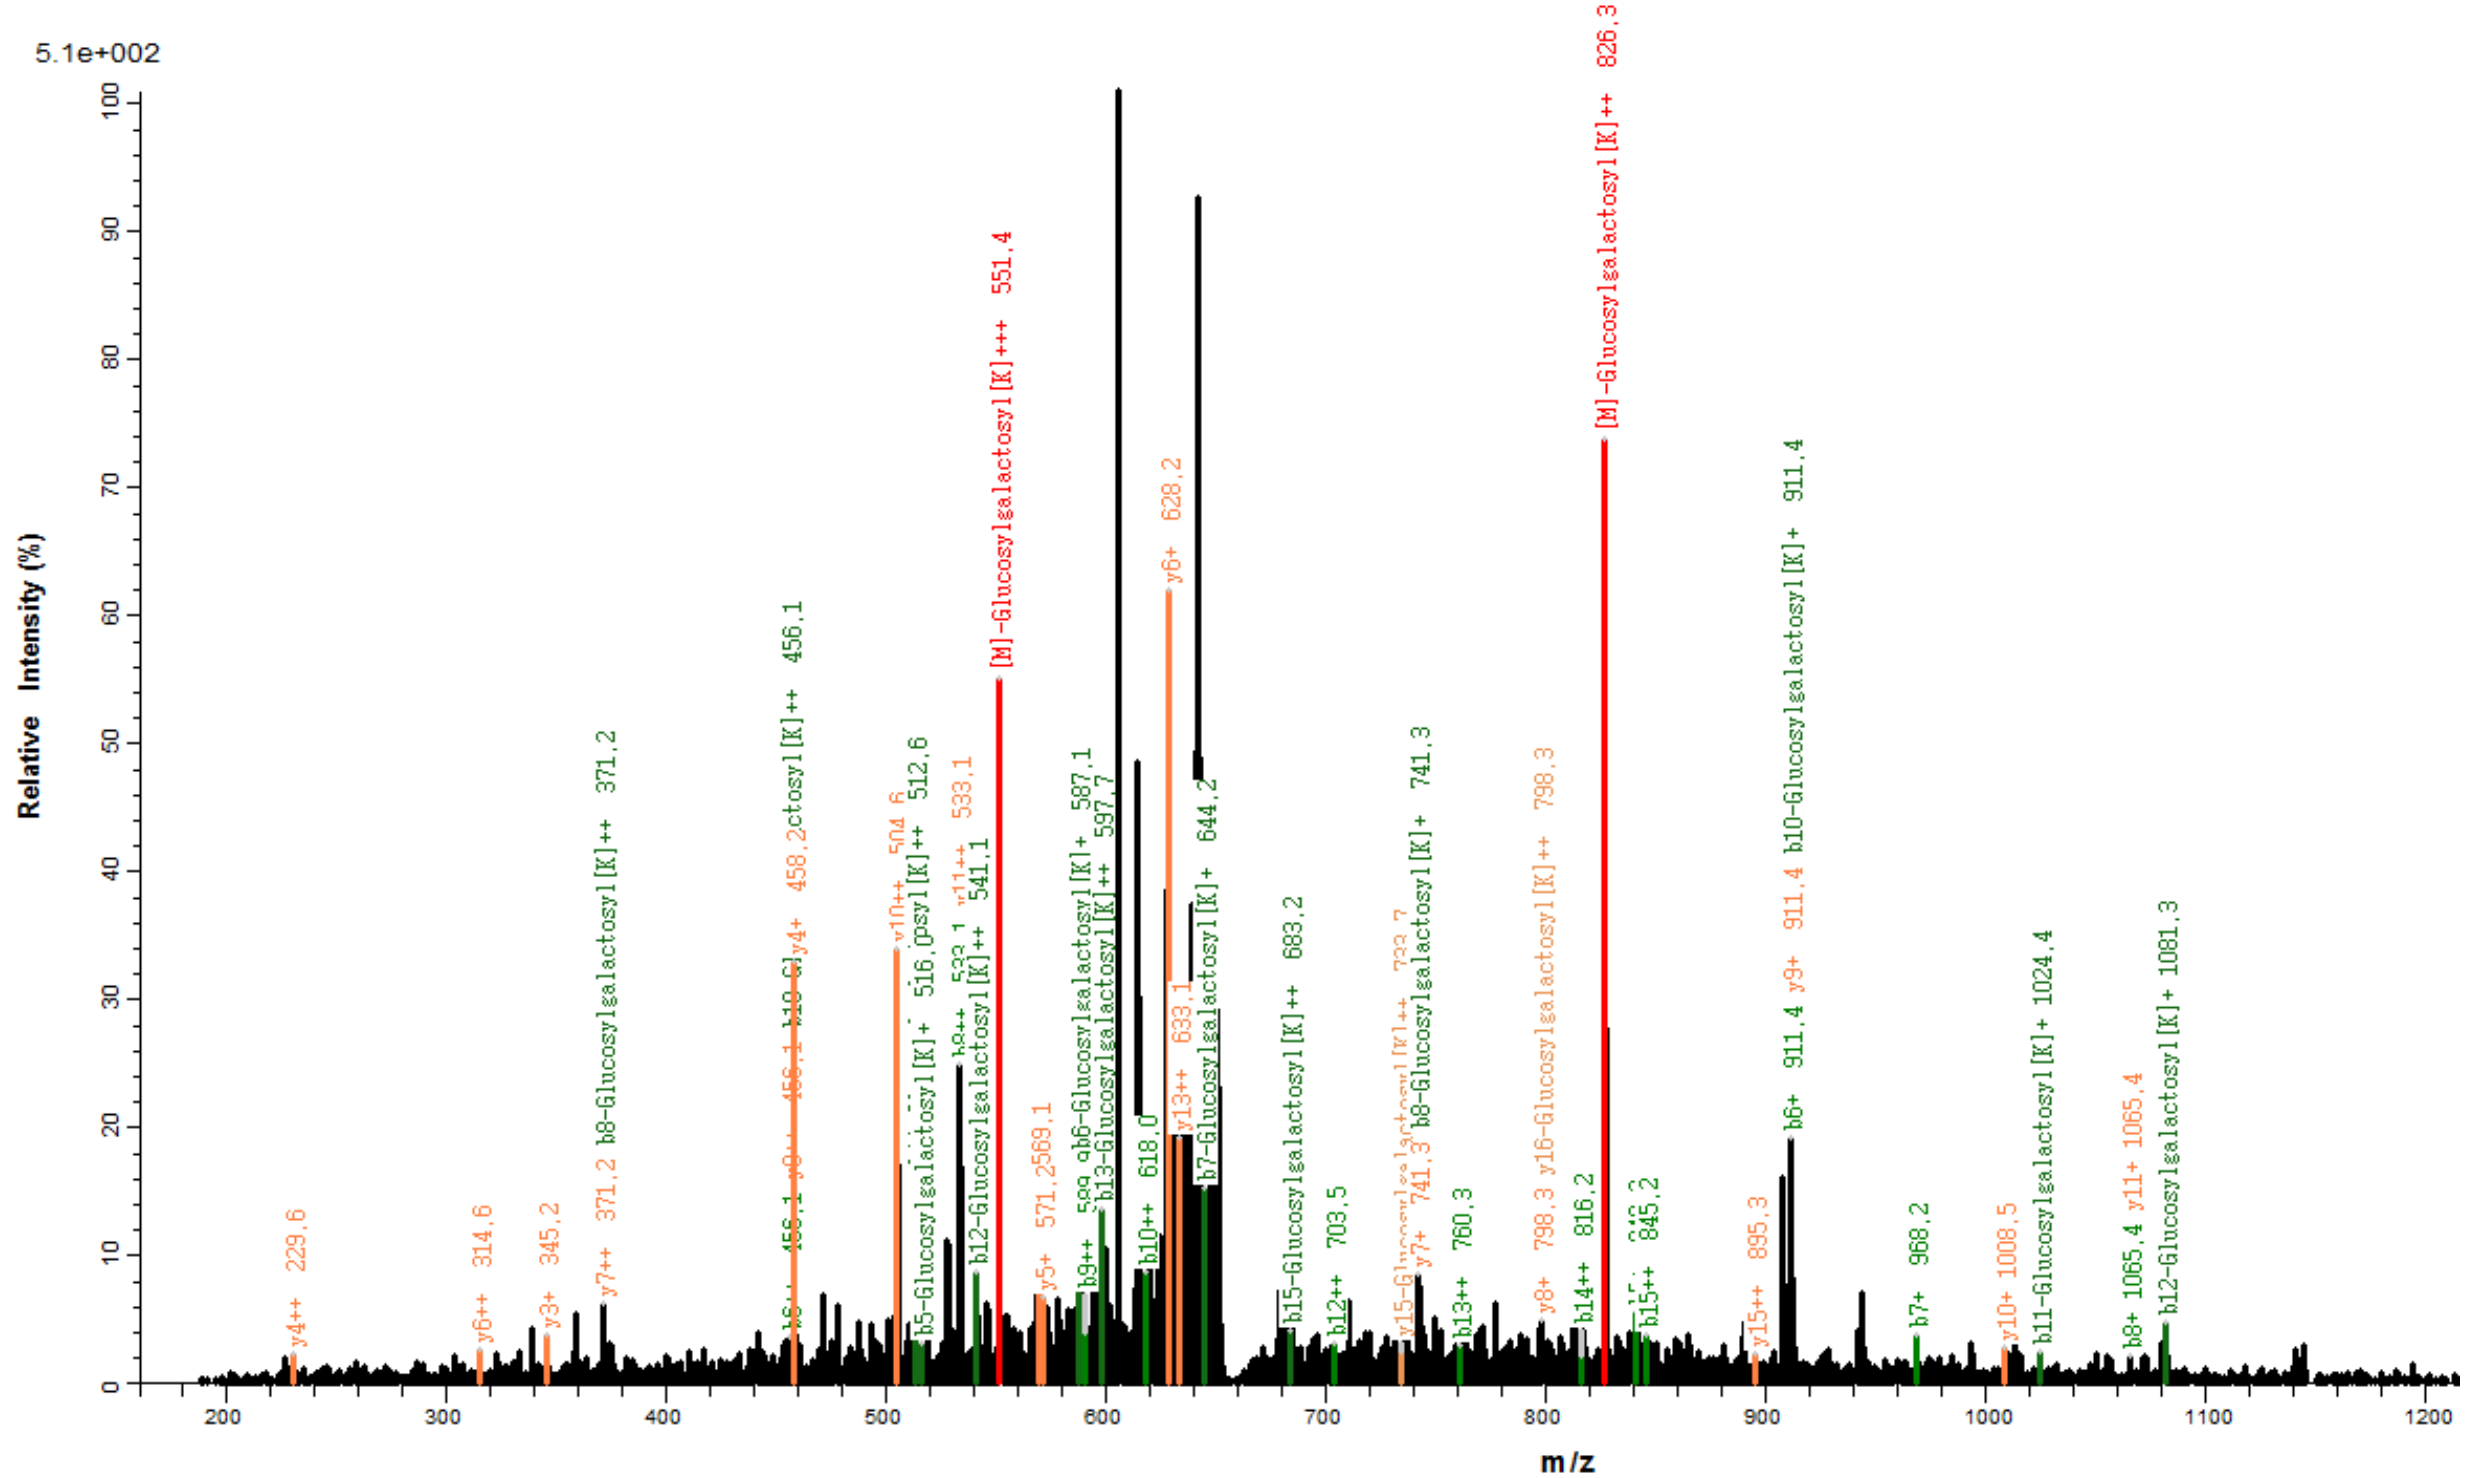

m/z = 701.6459 charge = +3

PSM showing the identification of Glucosylgalactosyl-HyK<sup>1066</sup>

Human col4a1 chain

<sup>1064</sup>G E K<sub>+340</sub> G D Q G I A G F P<sub>+16</sub> G S P<sub>+16</sub> G E K<sup>1081</sup>

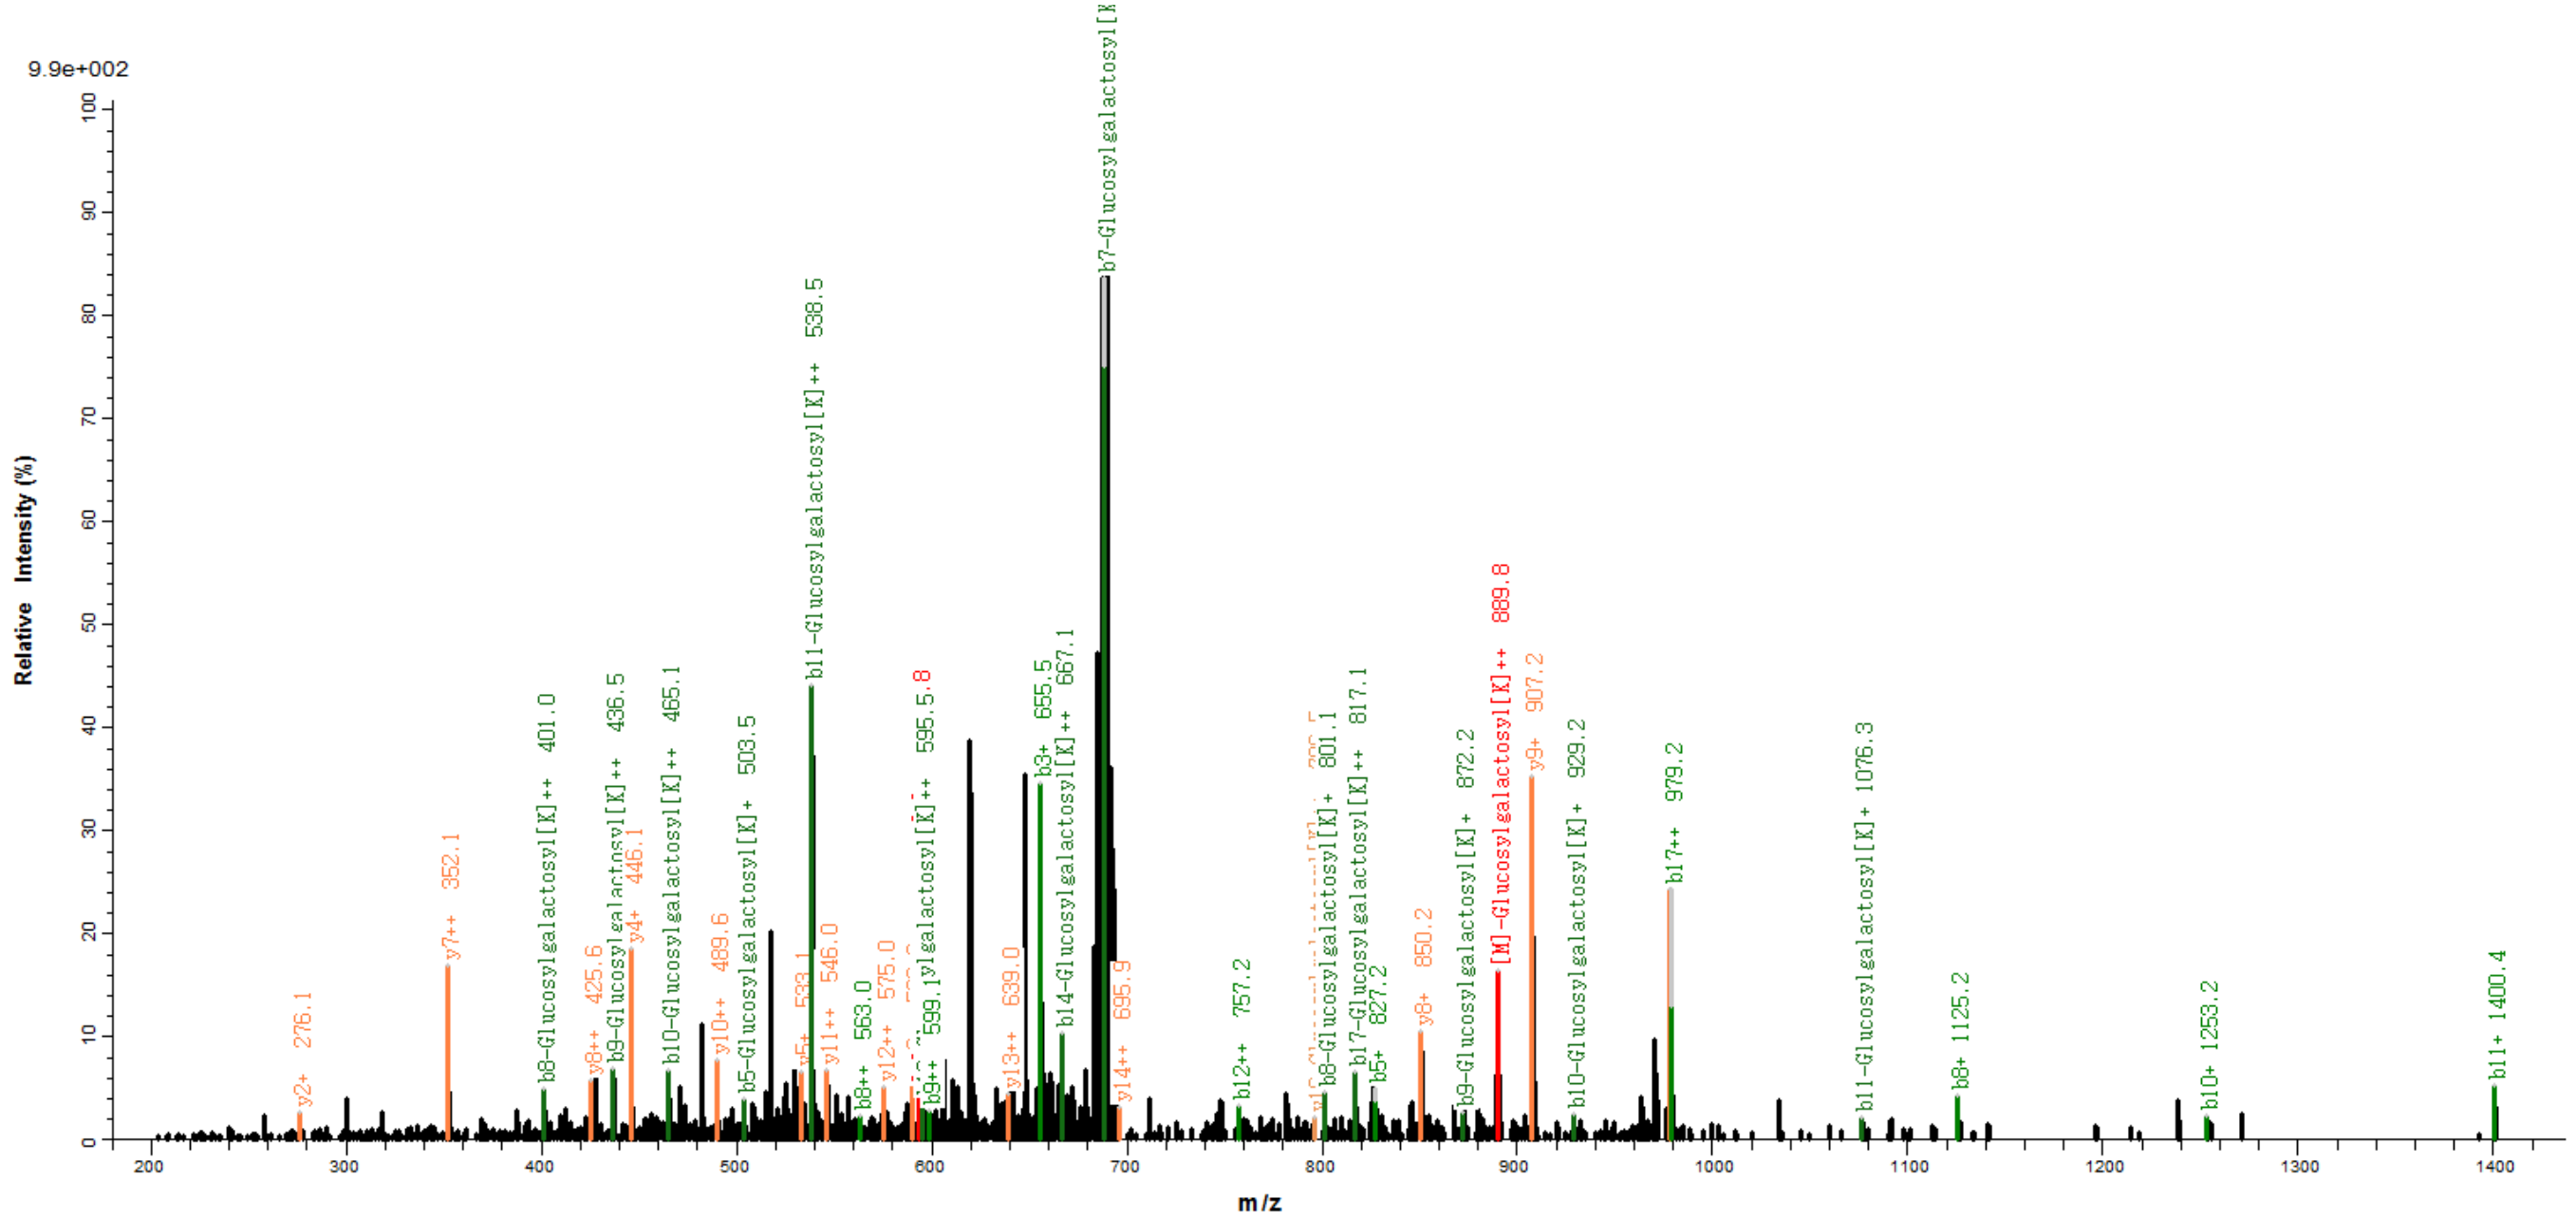

m/z = 682.9234 charge = +5

PSM showing the identification of Galactosyl-HyK<sup>1066</sup>

Human col4a1 chain

1064 G E K<sub>+178</sub> G D Q G I A G F P<sub>+16</sub> G S P G E K<sub>+16</sub> G E K G S I G I P<sub>+16</sub> G M P G S P<sub>+16</sub> G

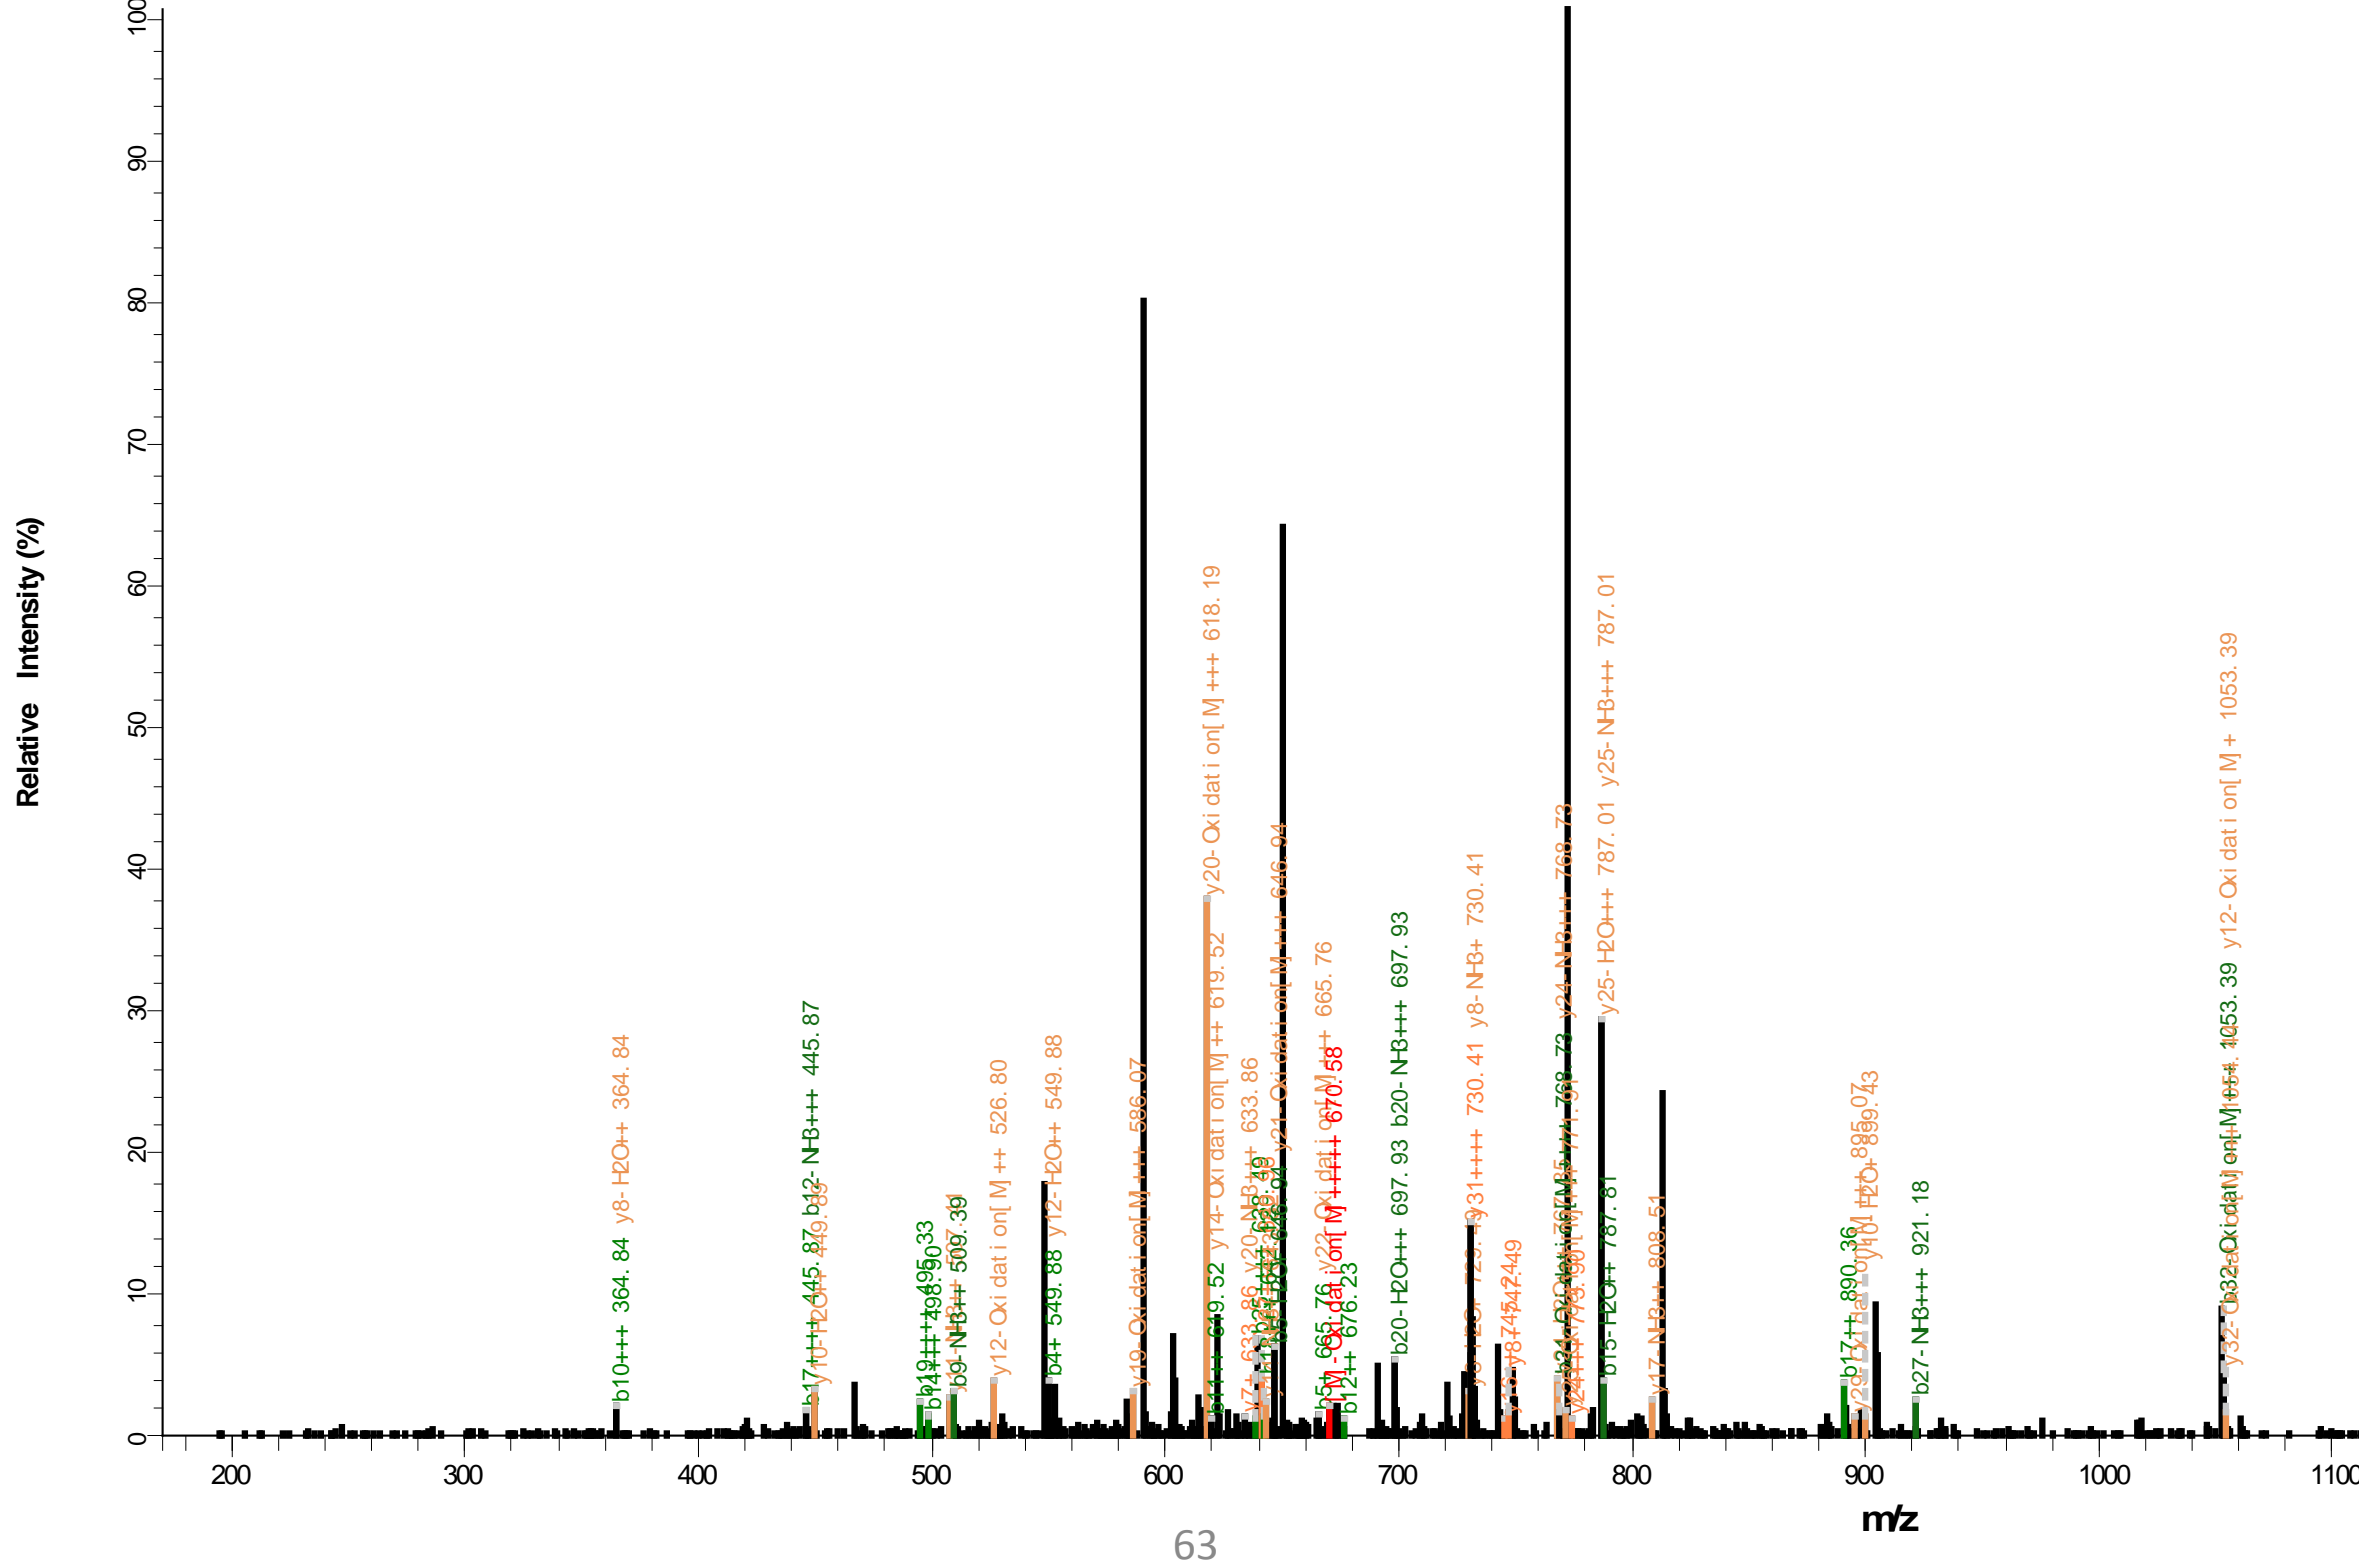



m/z = 1085.5333 charge = +4

PSM showing the identification of Galactosyl-HyK<sup>1117</sup>

Human col4a1 chain

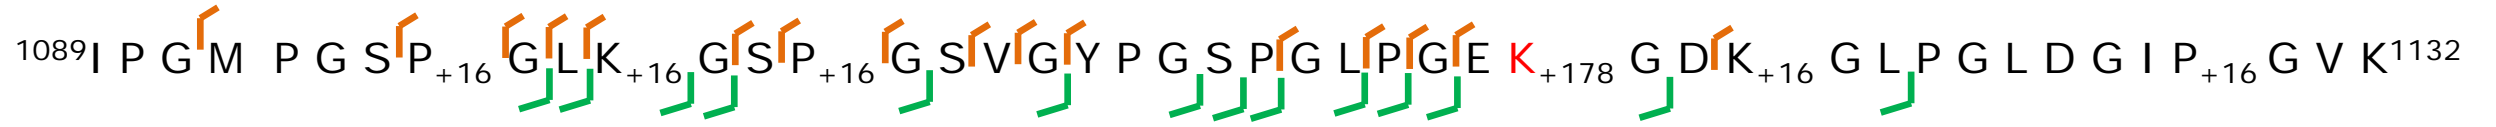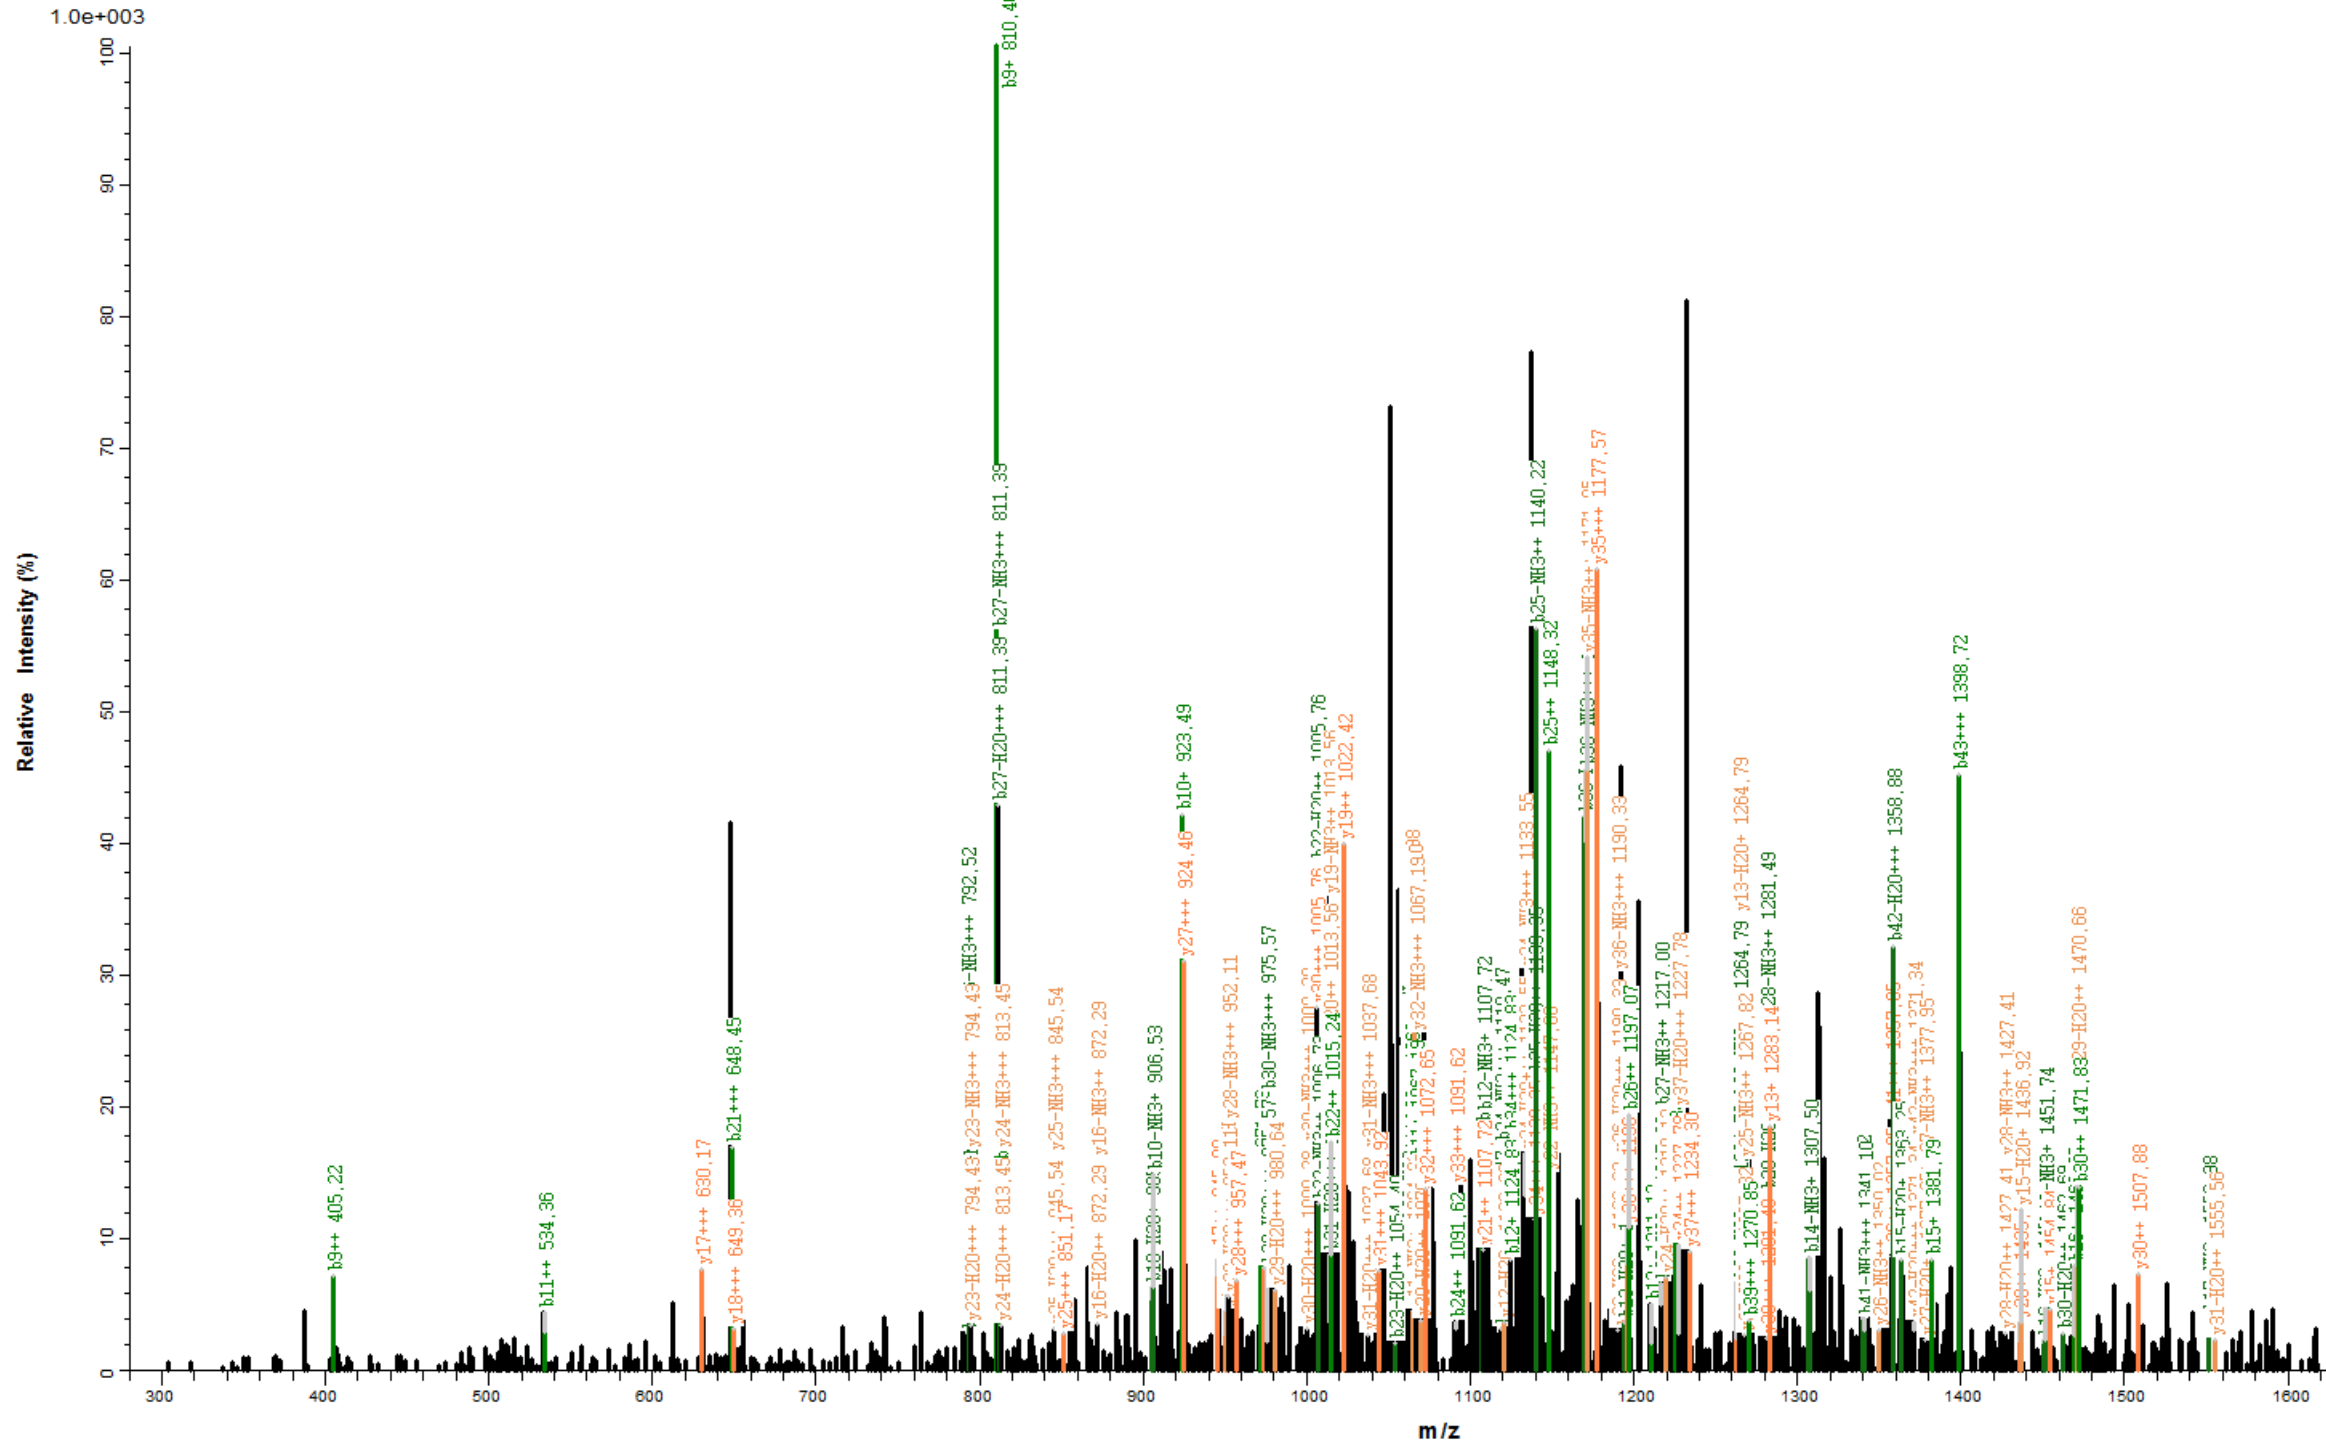

m/z = 909.2668 charge = +5

PSM showing the identification of Glucosylgalactosyl-HyK<sup>1132</sup>

Human col4a1 chain

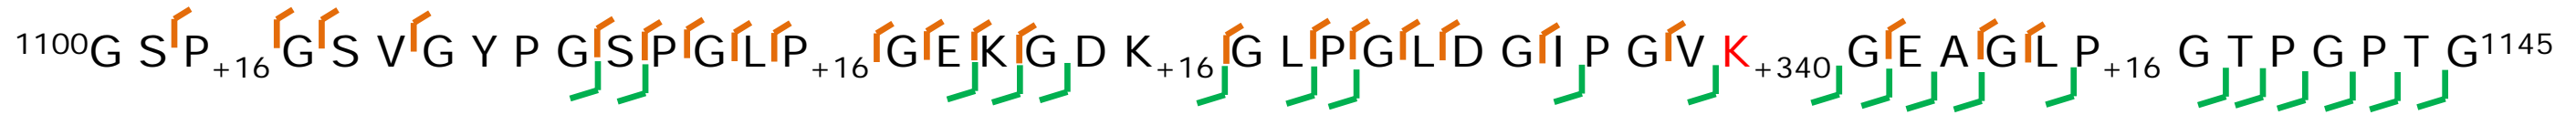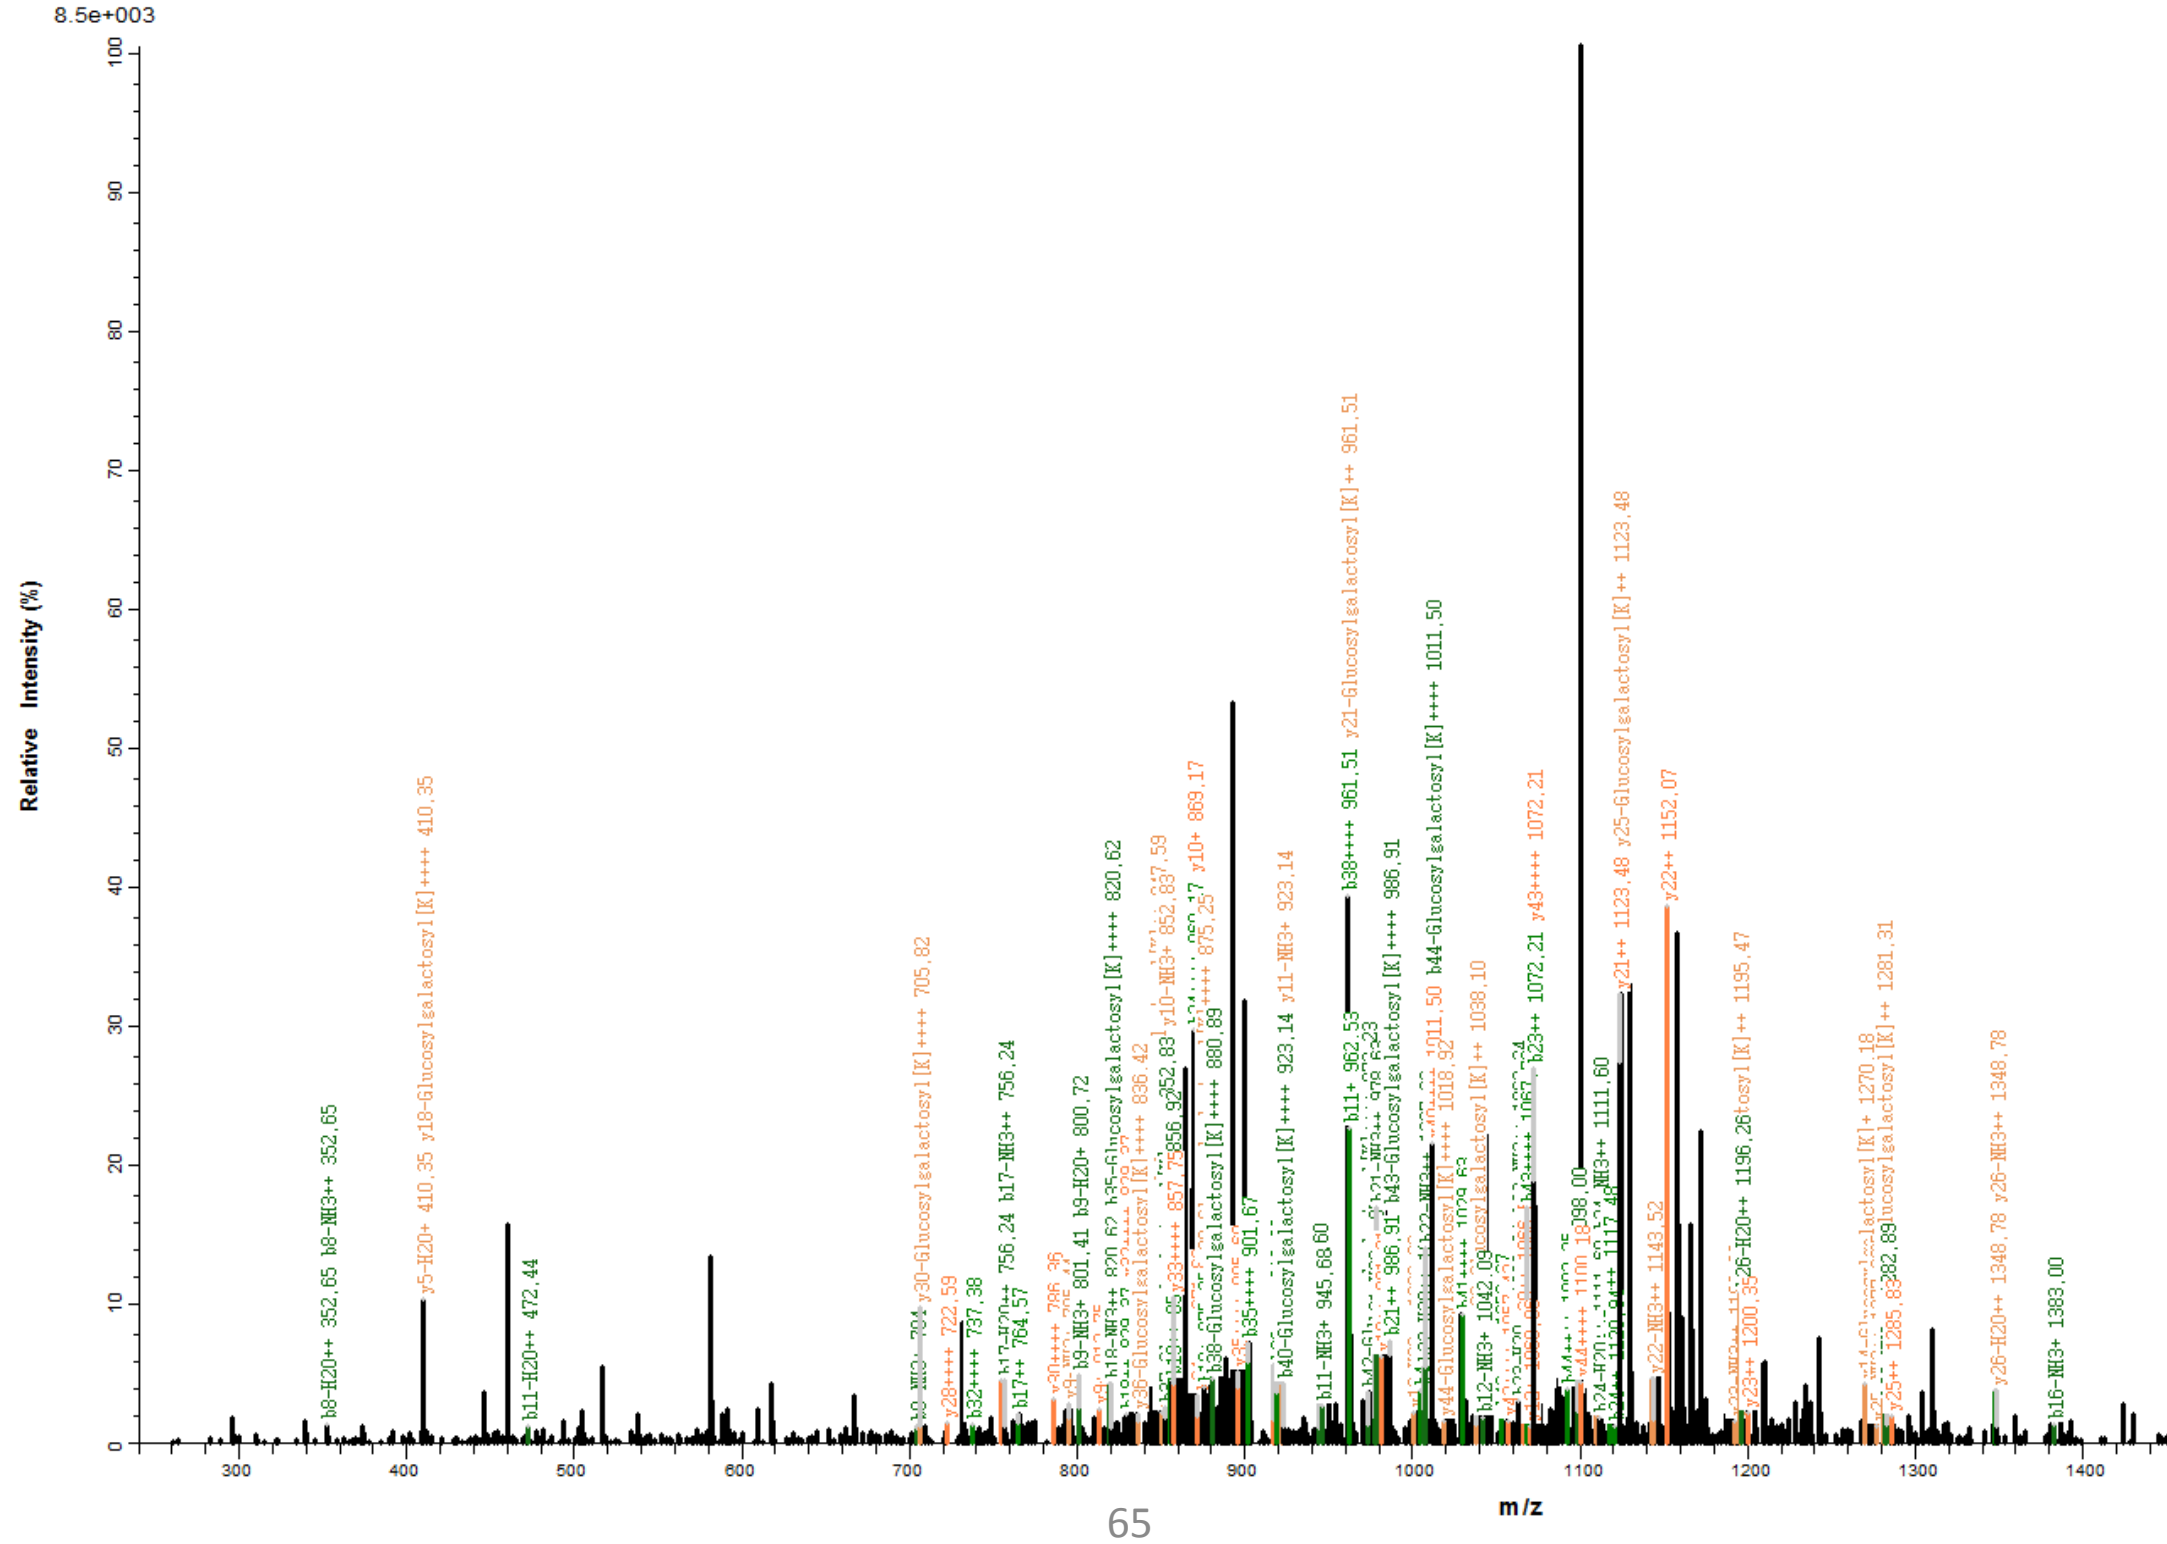

m/z = 464.8250 charge = +5

PSM showing the identification of Galactosyl-HyK<sup>1188</sup>

Human col4a1 chain

1184 D K G S K<sub>+178</sub> G E V G F P G L A G S P G I P G S K<sup>1206</sup>

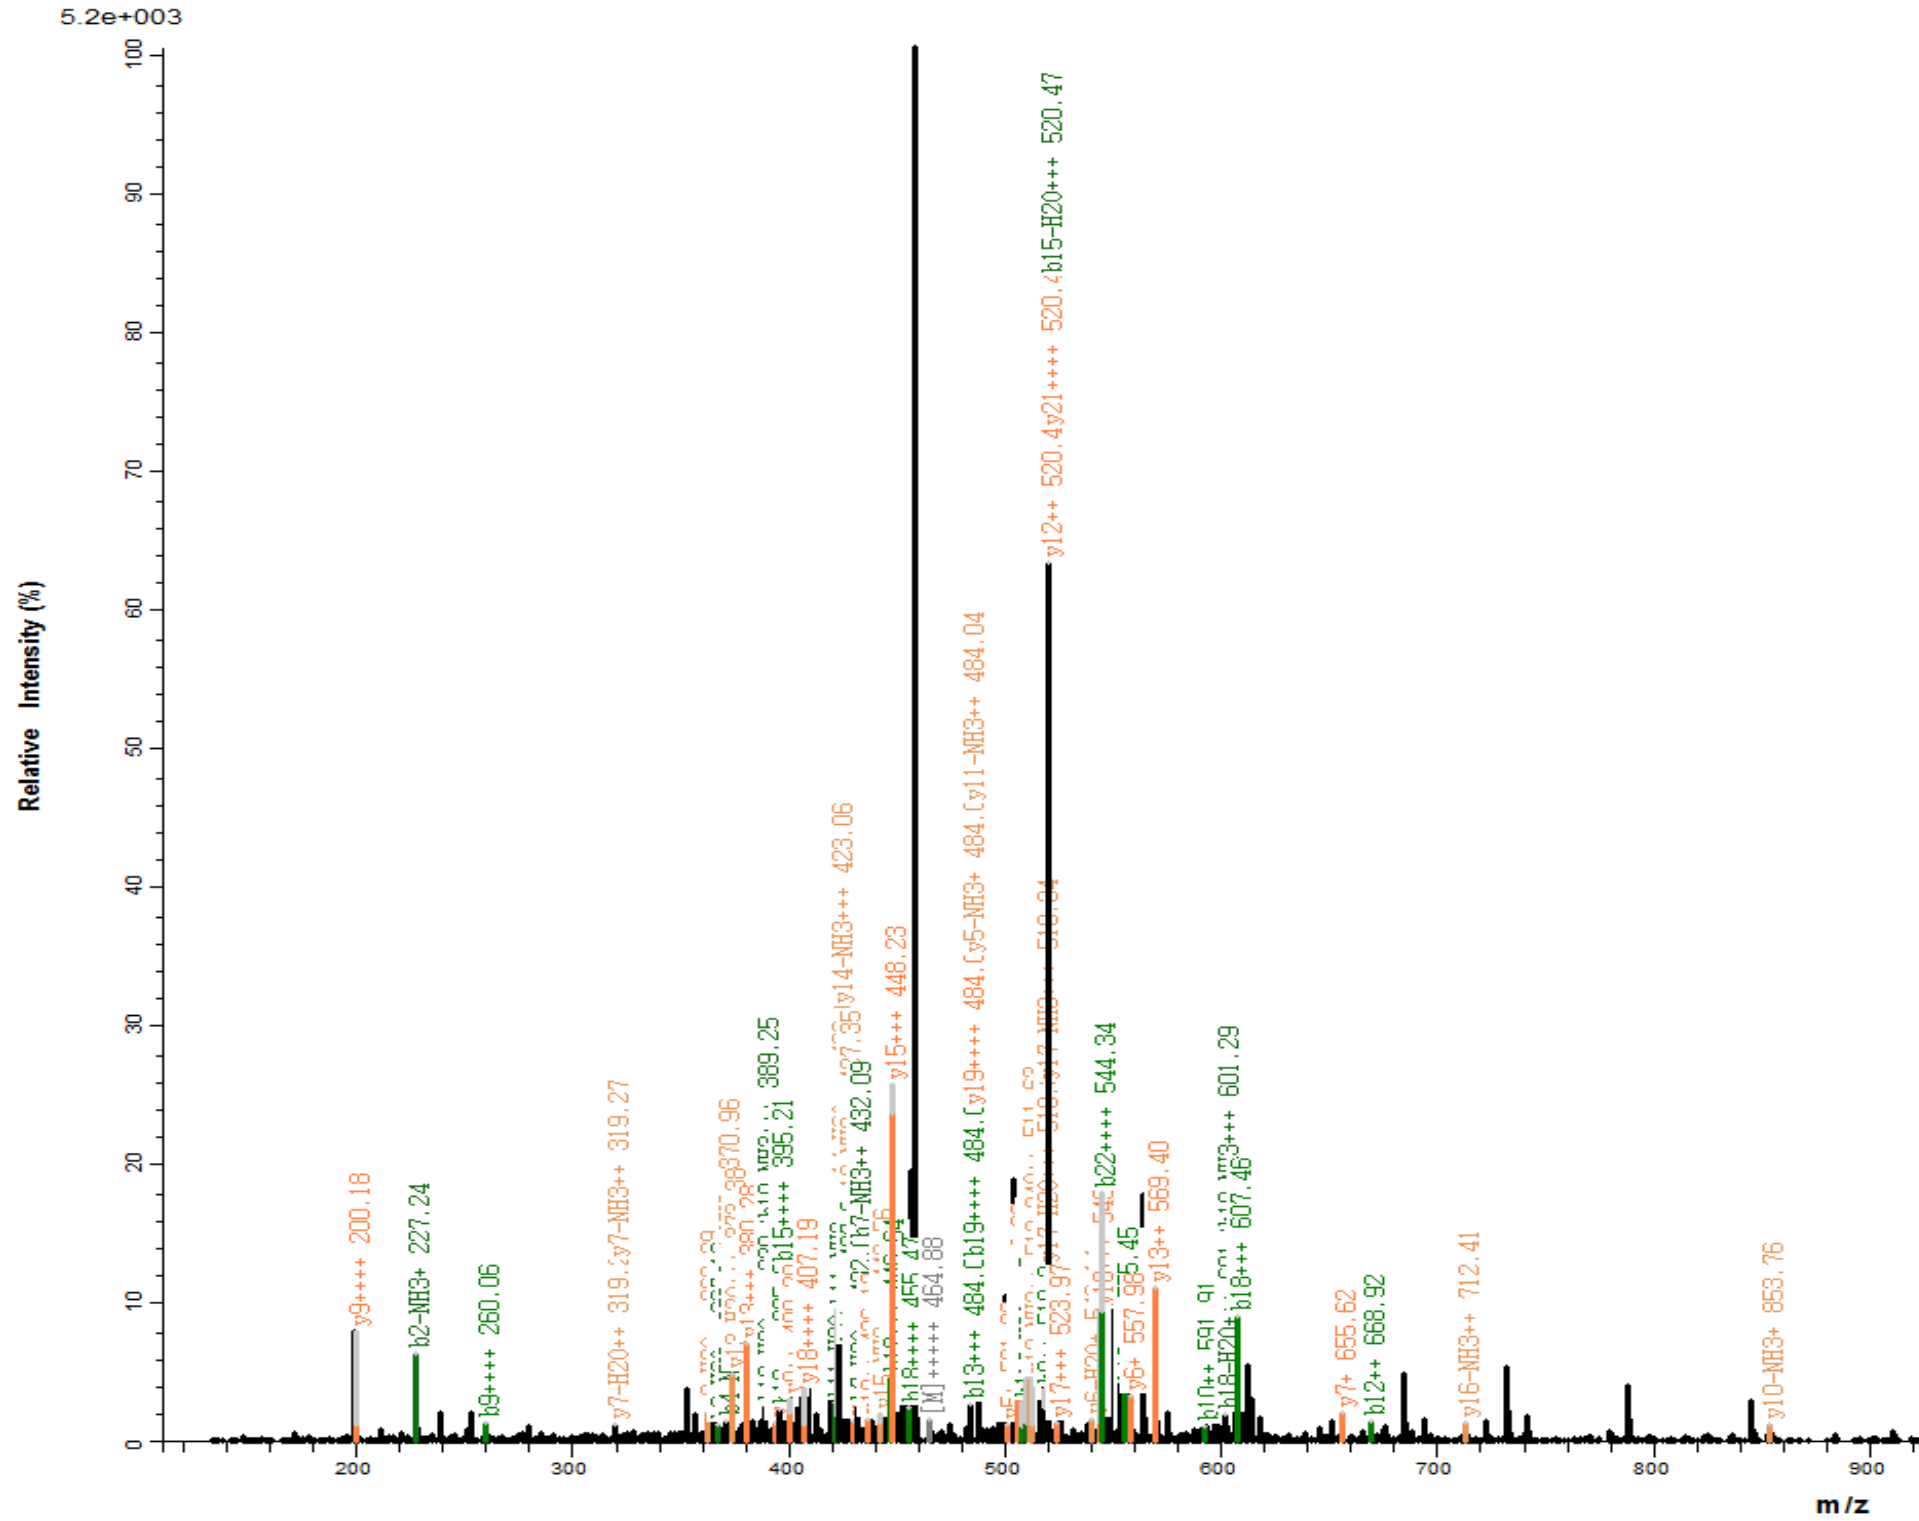

m/z = 913.2631 charge = +5

PSM showing the identification of Glucosylgalactosyl-HyK<sup>1185,1188</sup>

Human col4a1 chain

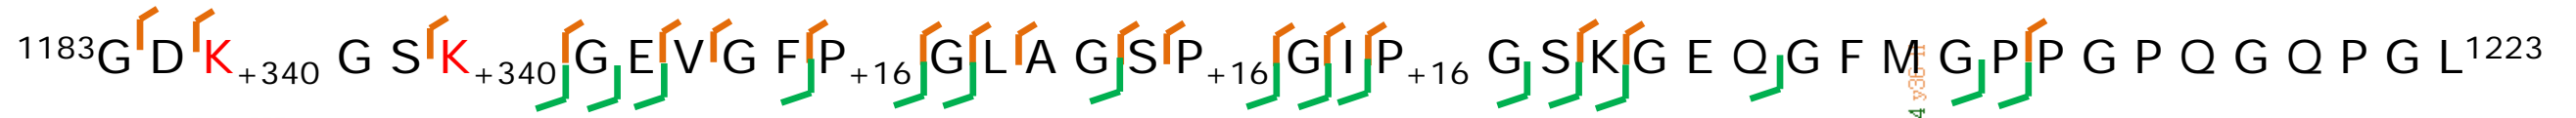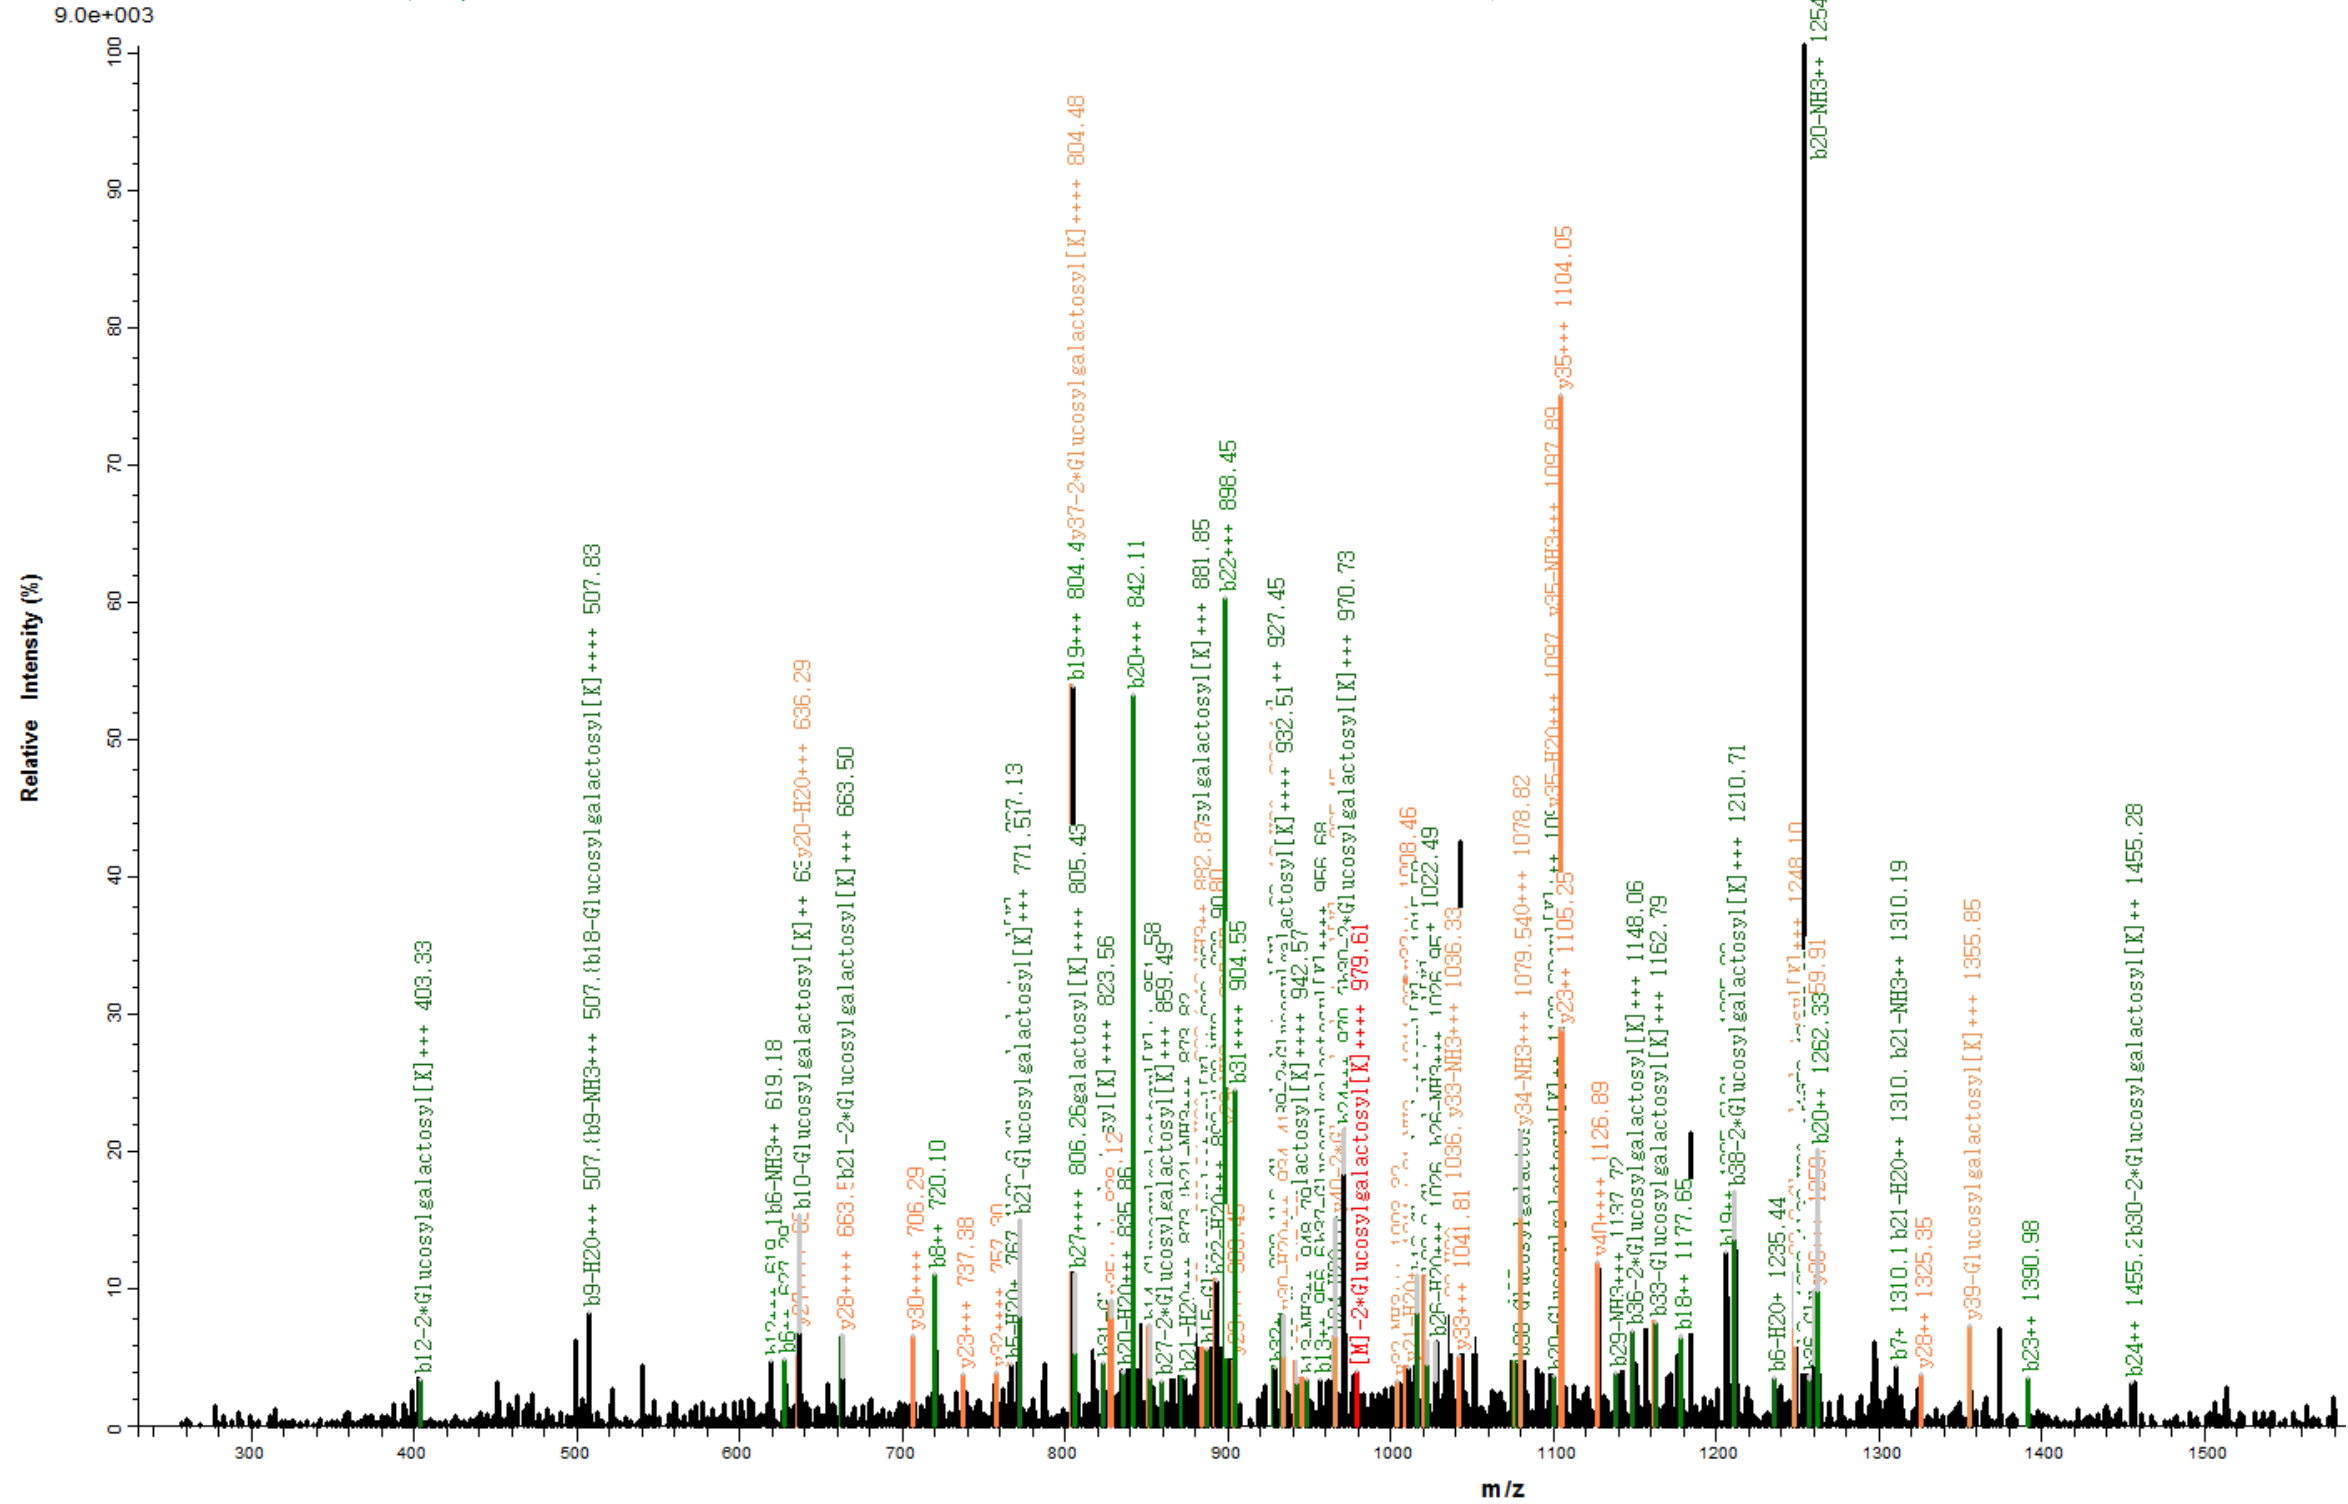

m/z= 1065.5275 charge= +3

PSM showing the identification of Glucosylgalactosyl-HyK<sup>1265</sup>

Human col4a1 chain

1239G P Q G Q P G L P<sub>+16</sub> G L P<sub>+16</sub> G P M G P P G L P<sub>+16</sub> G I D G V K<sub>+340</sub> G D K<sup>1268</sup>

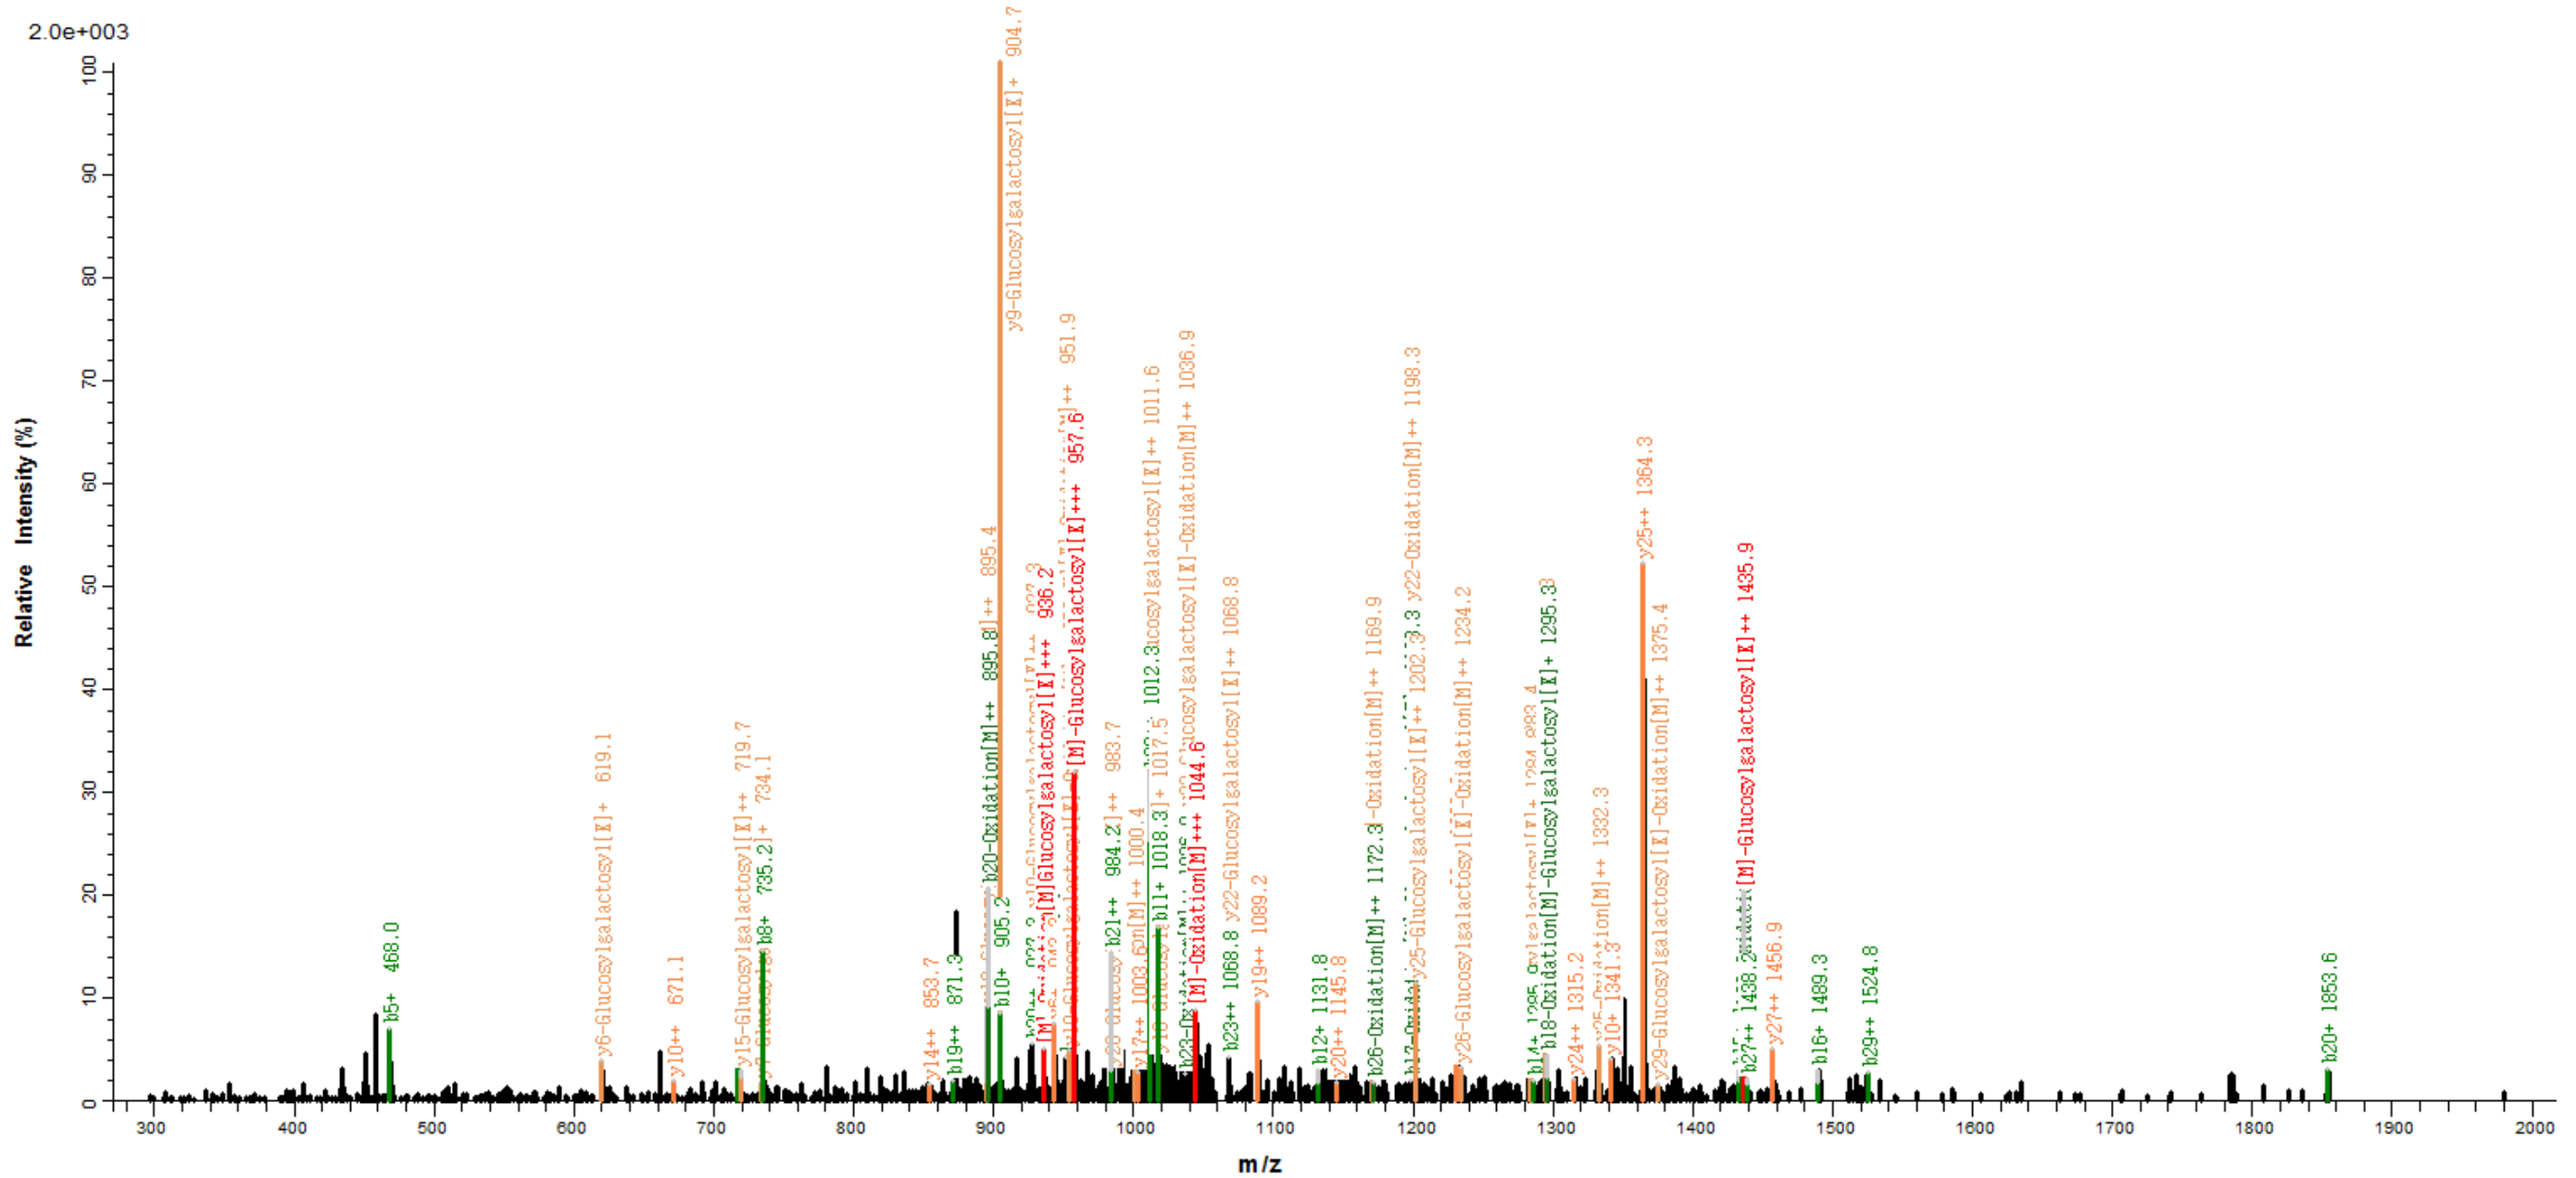

m/z= 1688.9413 charge= +5

PSM showing the identification of Galactosyl-HyK<sup>1304</sup>

Human col4a1 chain

1286P G F Q G M P<sub>+16</sub> G I G G S P<sub>+16</sub> G I T G S K<sub>+178</sub> G D M G P P<sub>+16</sub> G V P<sub>+16</sub> G F Q G P K<sub>+16</sub> 1319

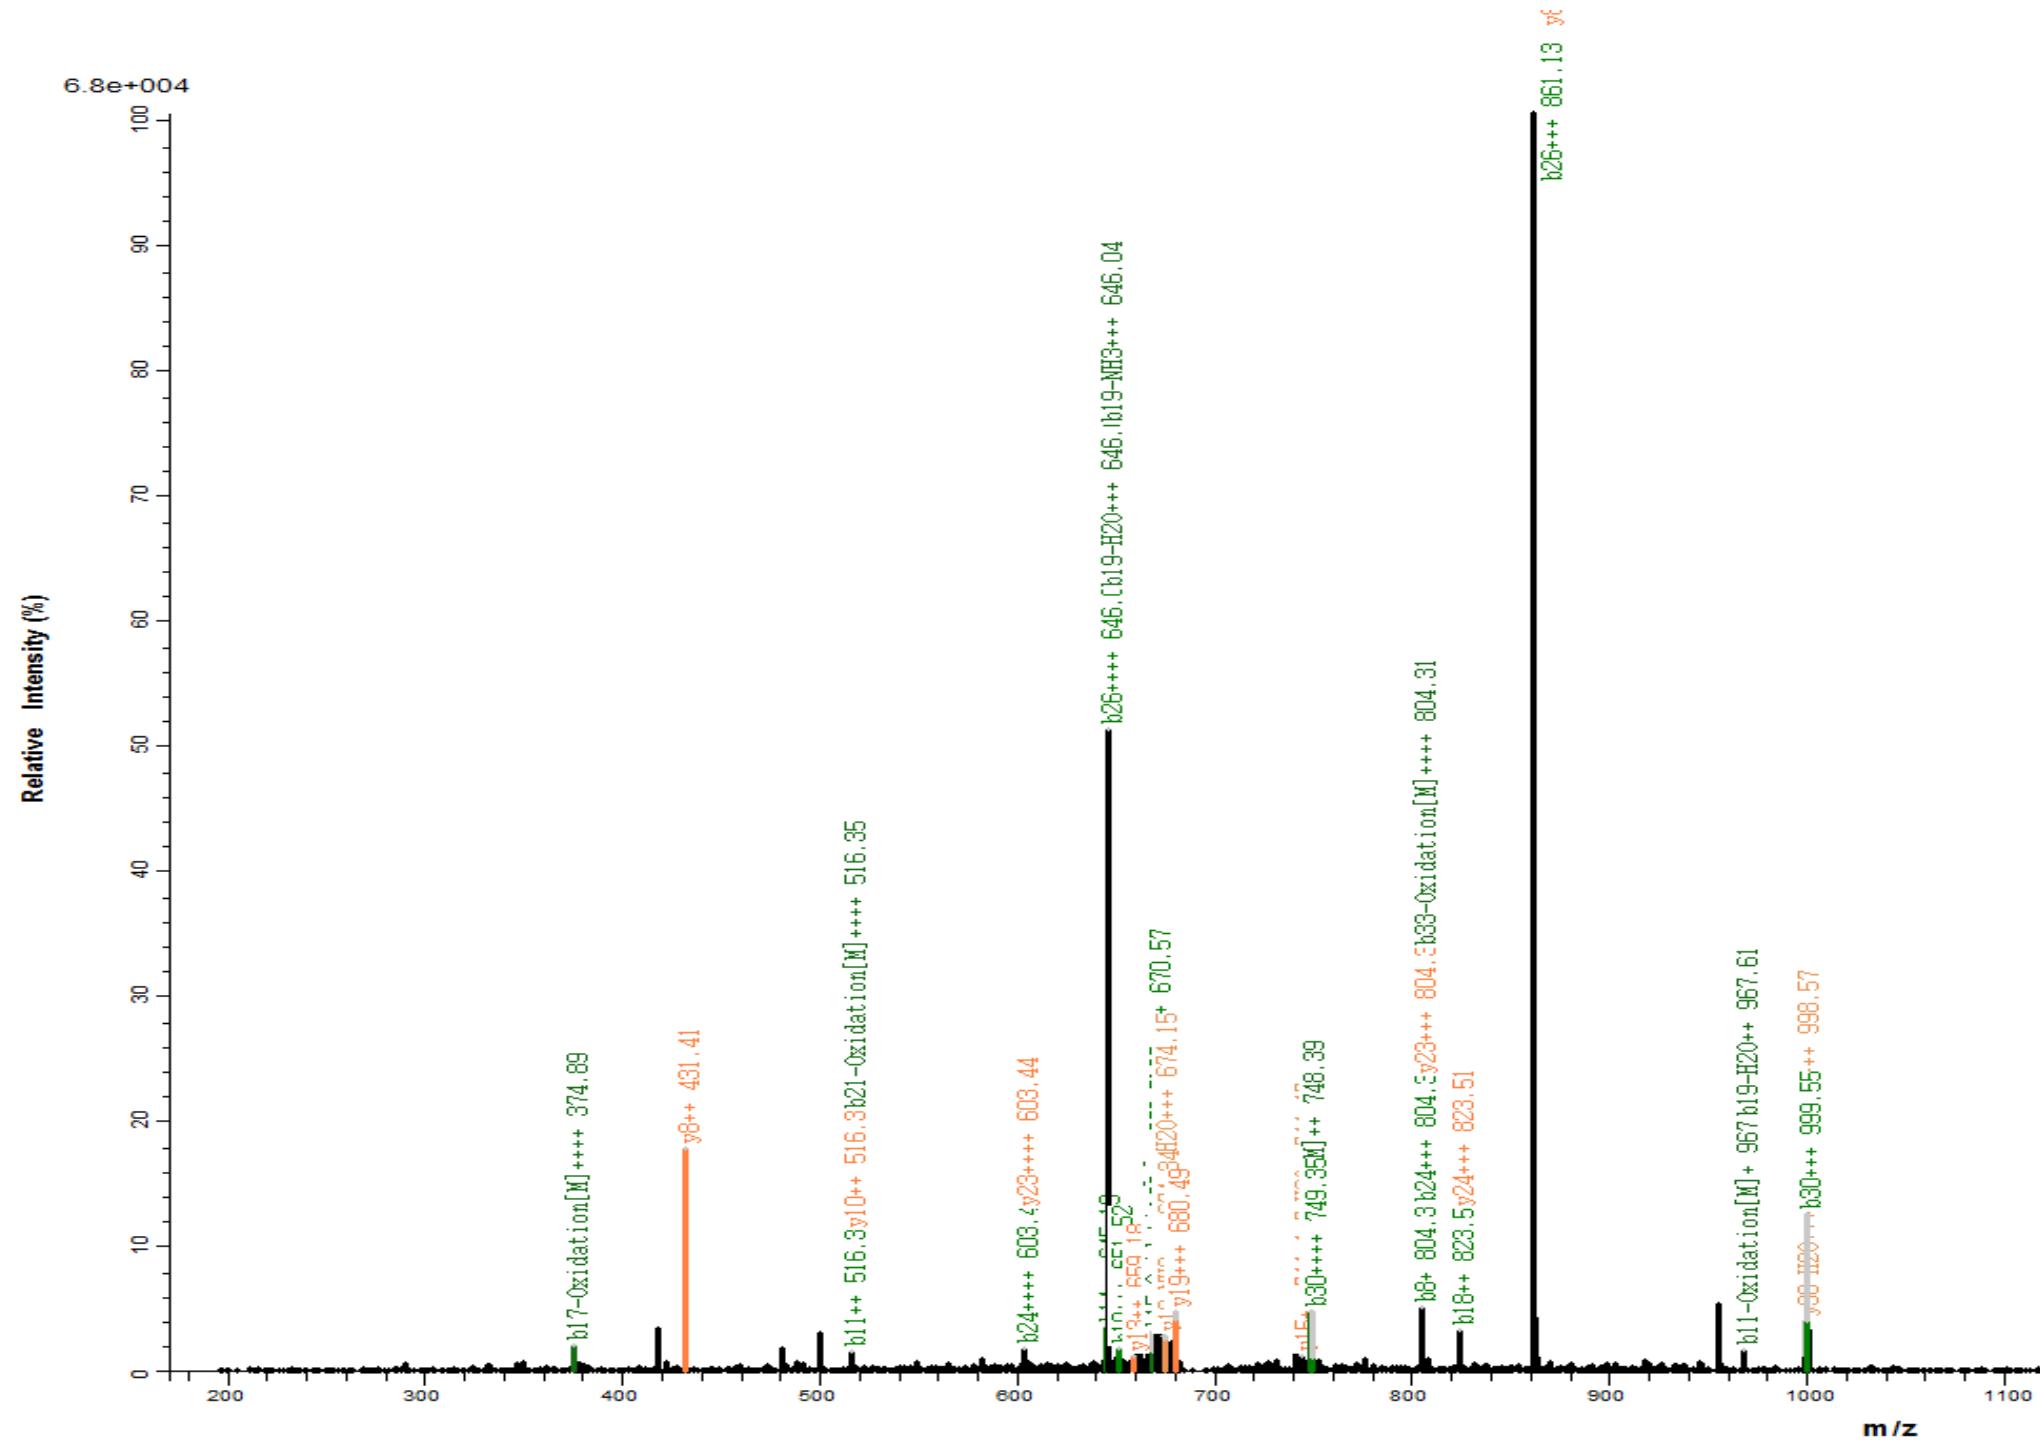

m/z = 929.8210 charge = +6

PSM showing the identification of Galactosyl-HyK<sup>1319,1328</sup>

Human col4a1 chain

1307M G P P<sub>+16</sub> G V P<sub>+16</sub> G F Q G P K<sub>+178</sub> G L P G L Q G I K<sub>+340</sub> G D Q G D Q G V P G A K<sub>+178</sub> G L P G P P<sub>+16</sub> G P P<sub>+16</sub> G P Y D I I K<sup>1356</sup>

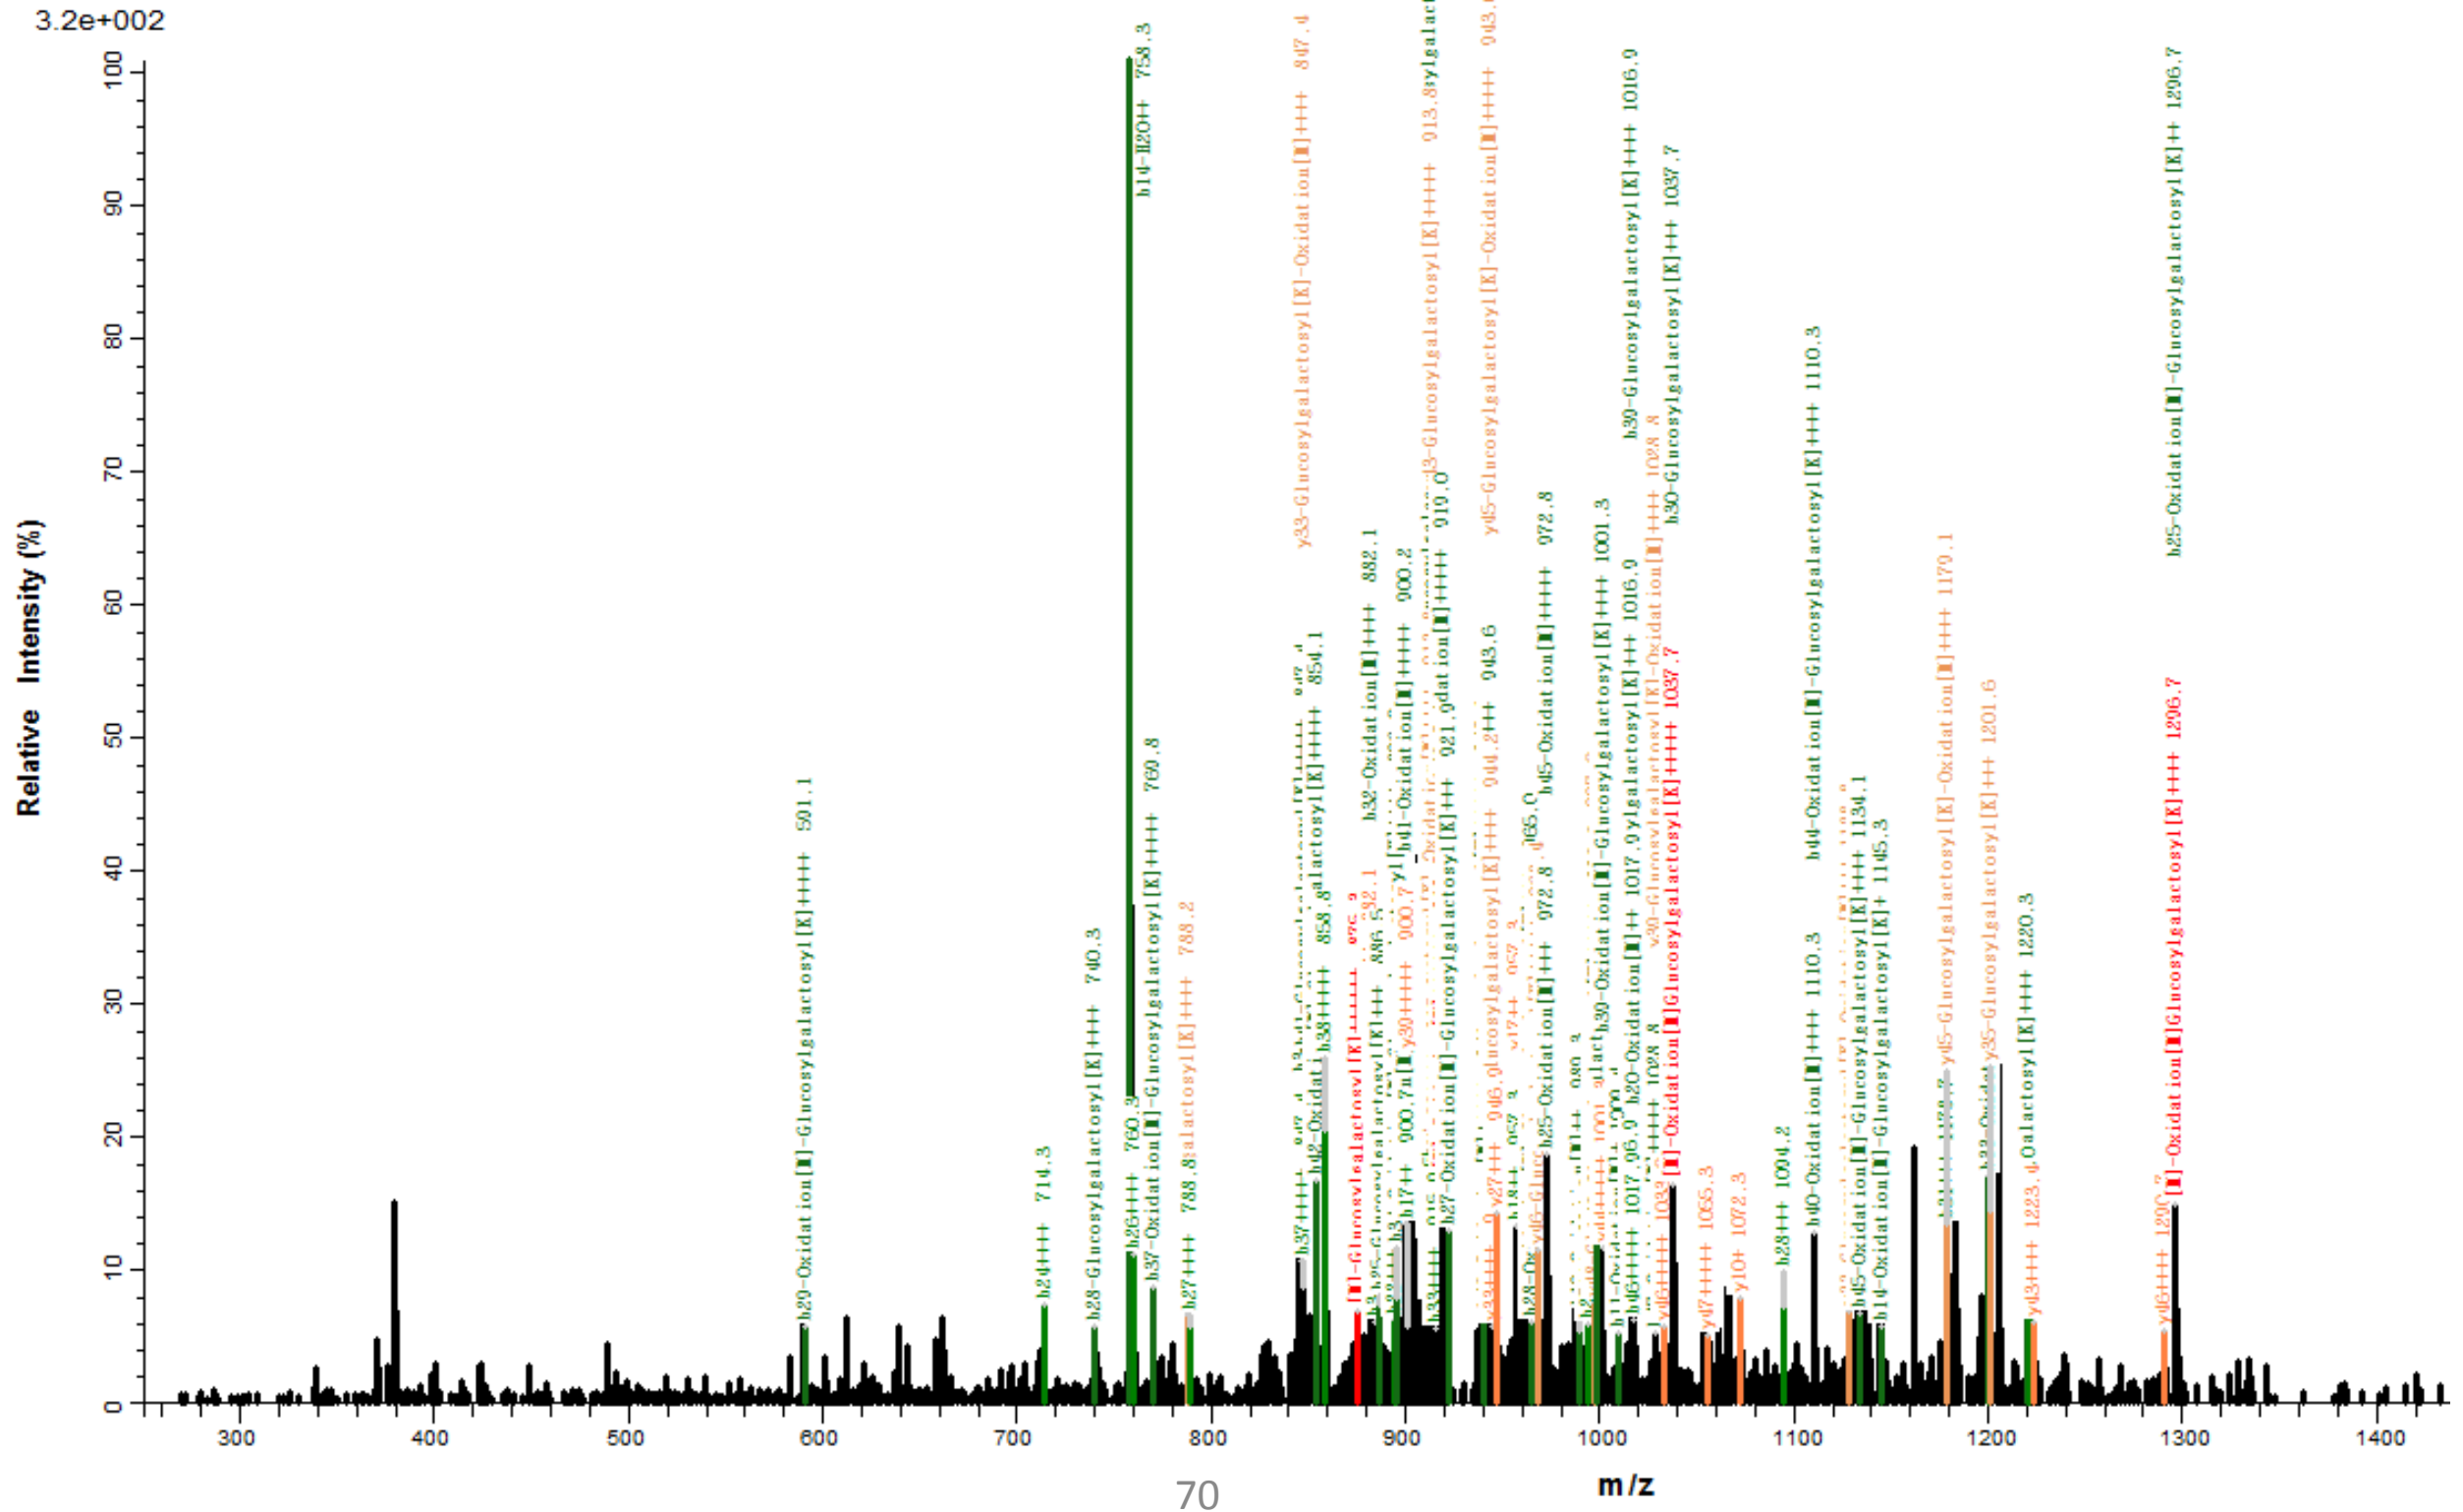

m/z = 992.8703 charge = +5 PSM showing the identification of Glucosylgalactosyl-HyK<sup>1304,1328</sup> and Galactosyl-HyK<sup>1319</sup> Human col4a1 chain

<sup>1298</sup>P G I T G S K<sub>+340</sub> G D M G P P<sub>+16</sub> G V P G F Q G P K<sub>+178</sub> G L P G L Q G I K<sub>+340</sub> G D Q G D Q G V P<sub>+16</sub> G A K<sub>+16</sub> <sup>1340</sup>

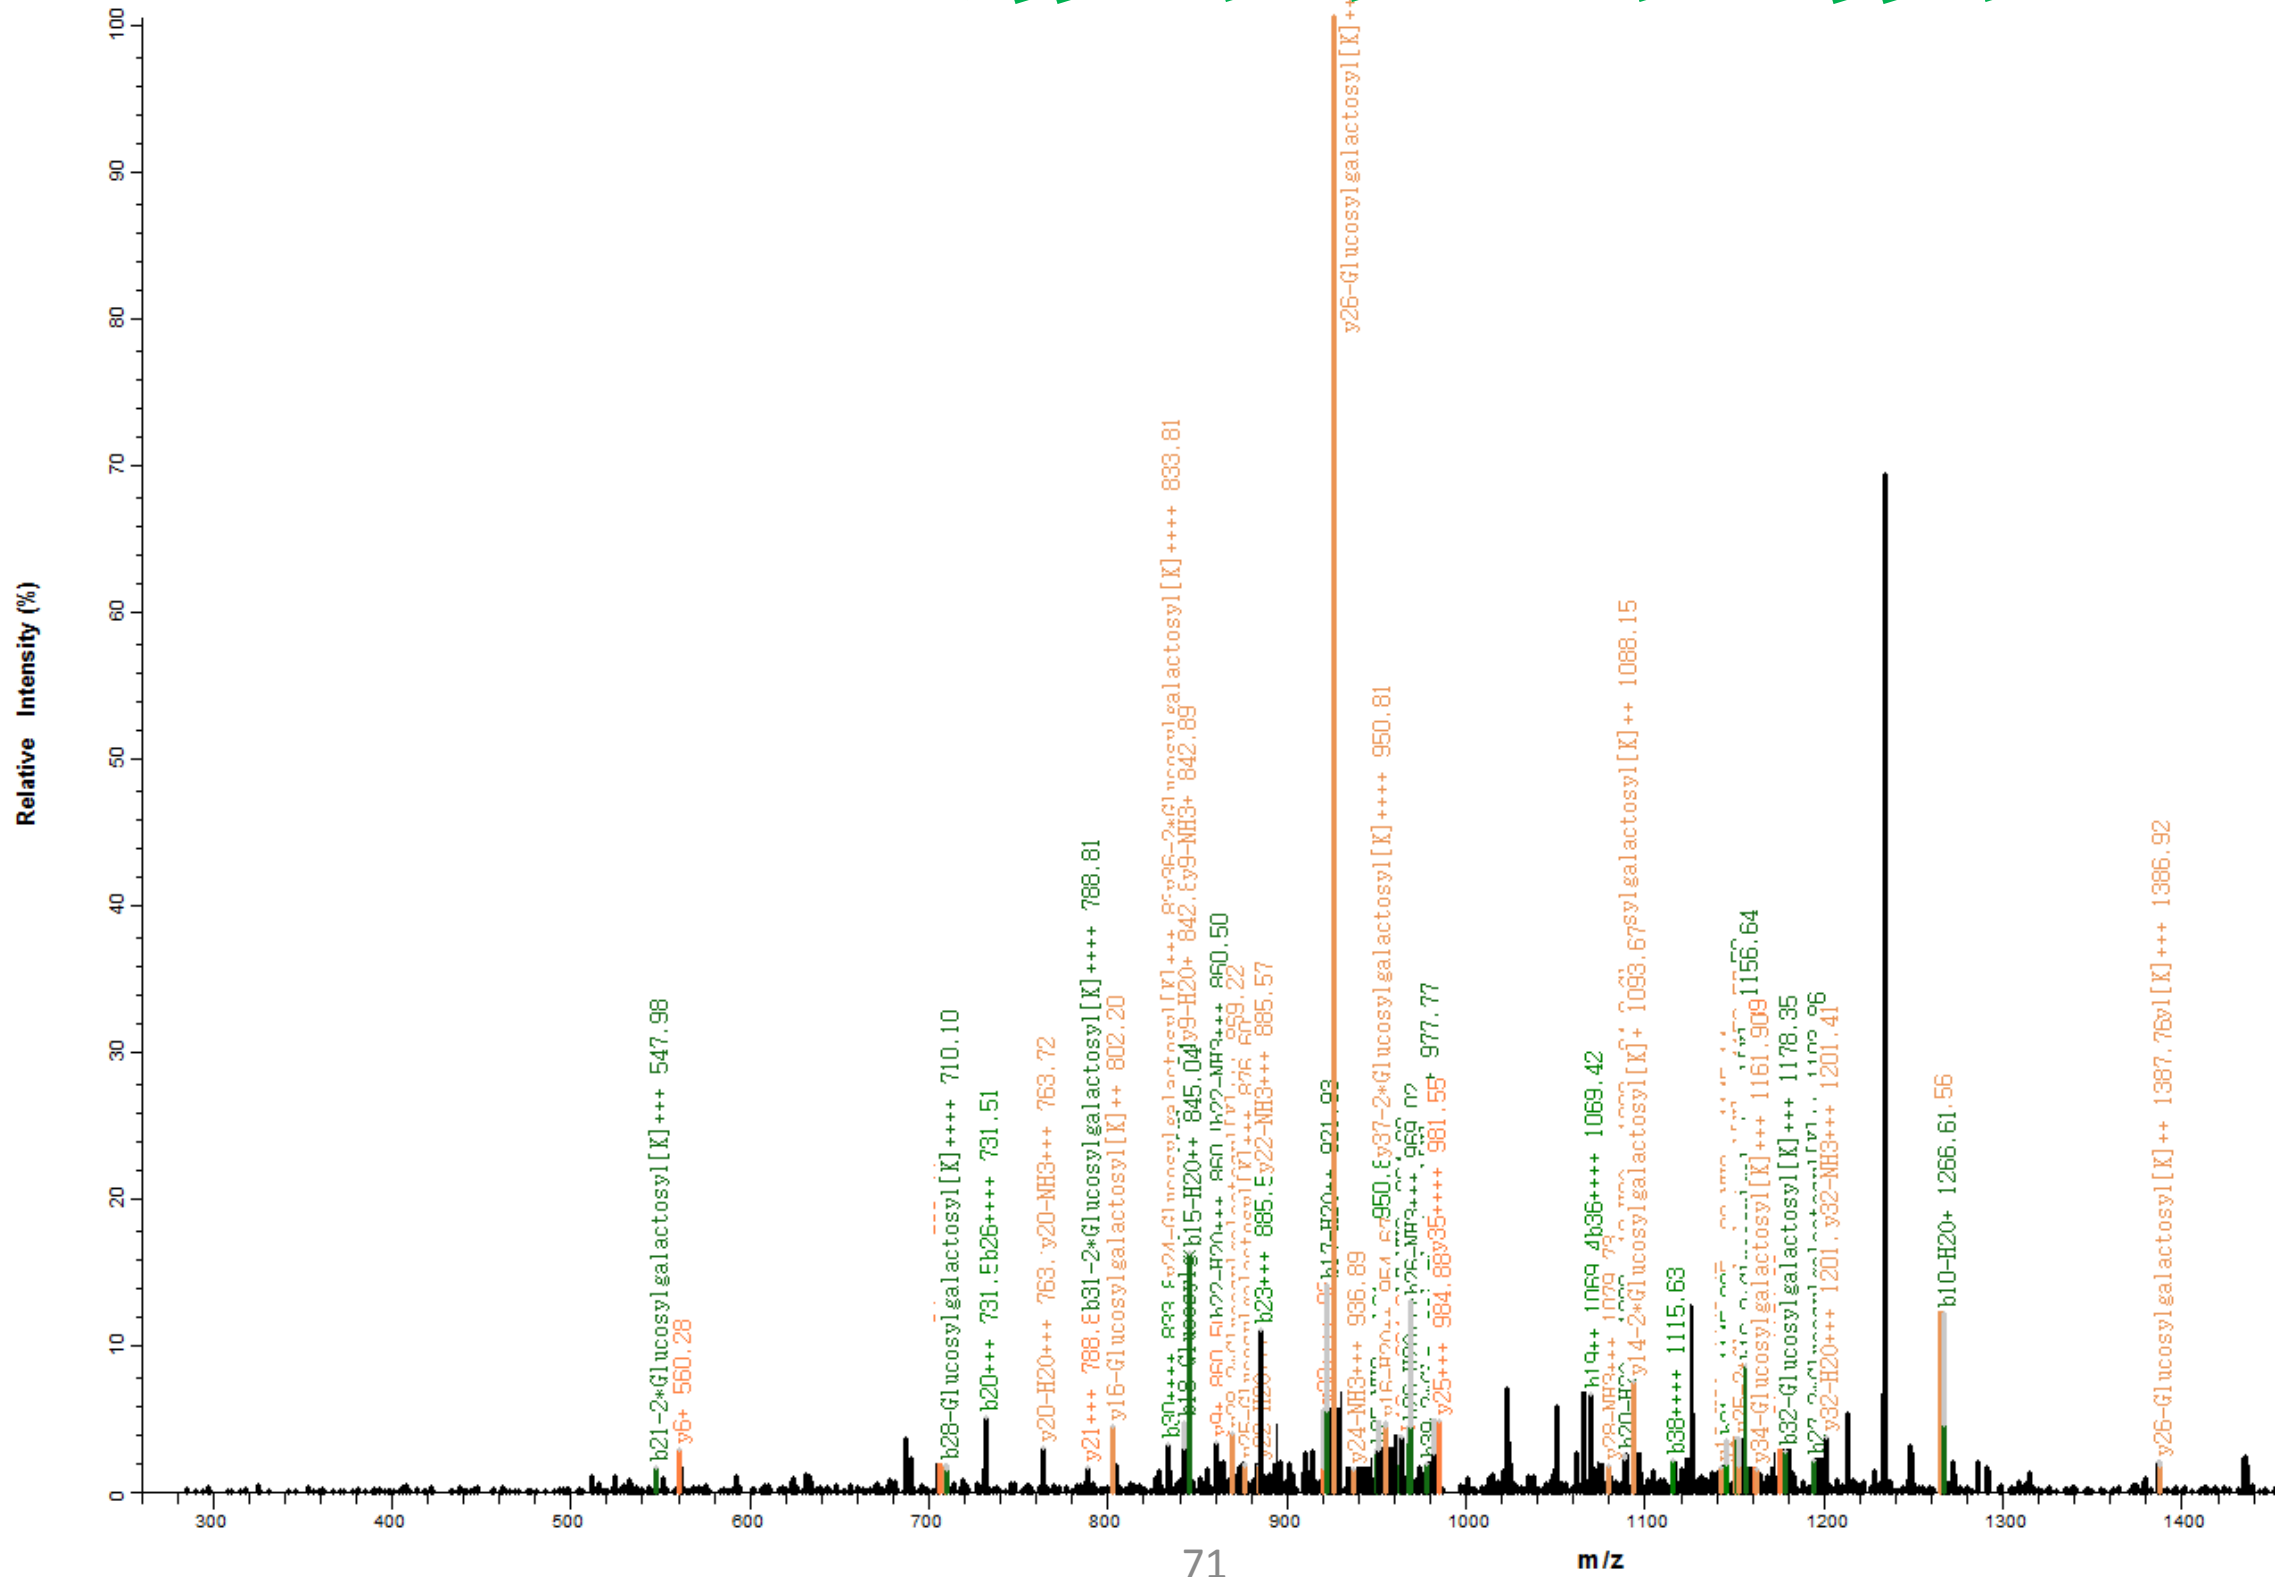



m/z = 575.8043 charge = +4

PSM showing the identification of Glucosylgalactosyl-HyK<sup>1340</sup>

Human col4a1 chain

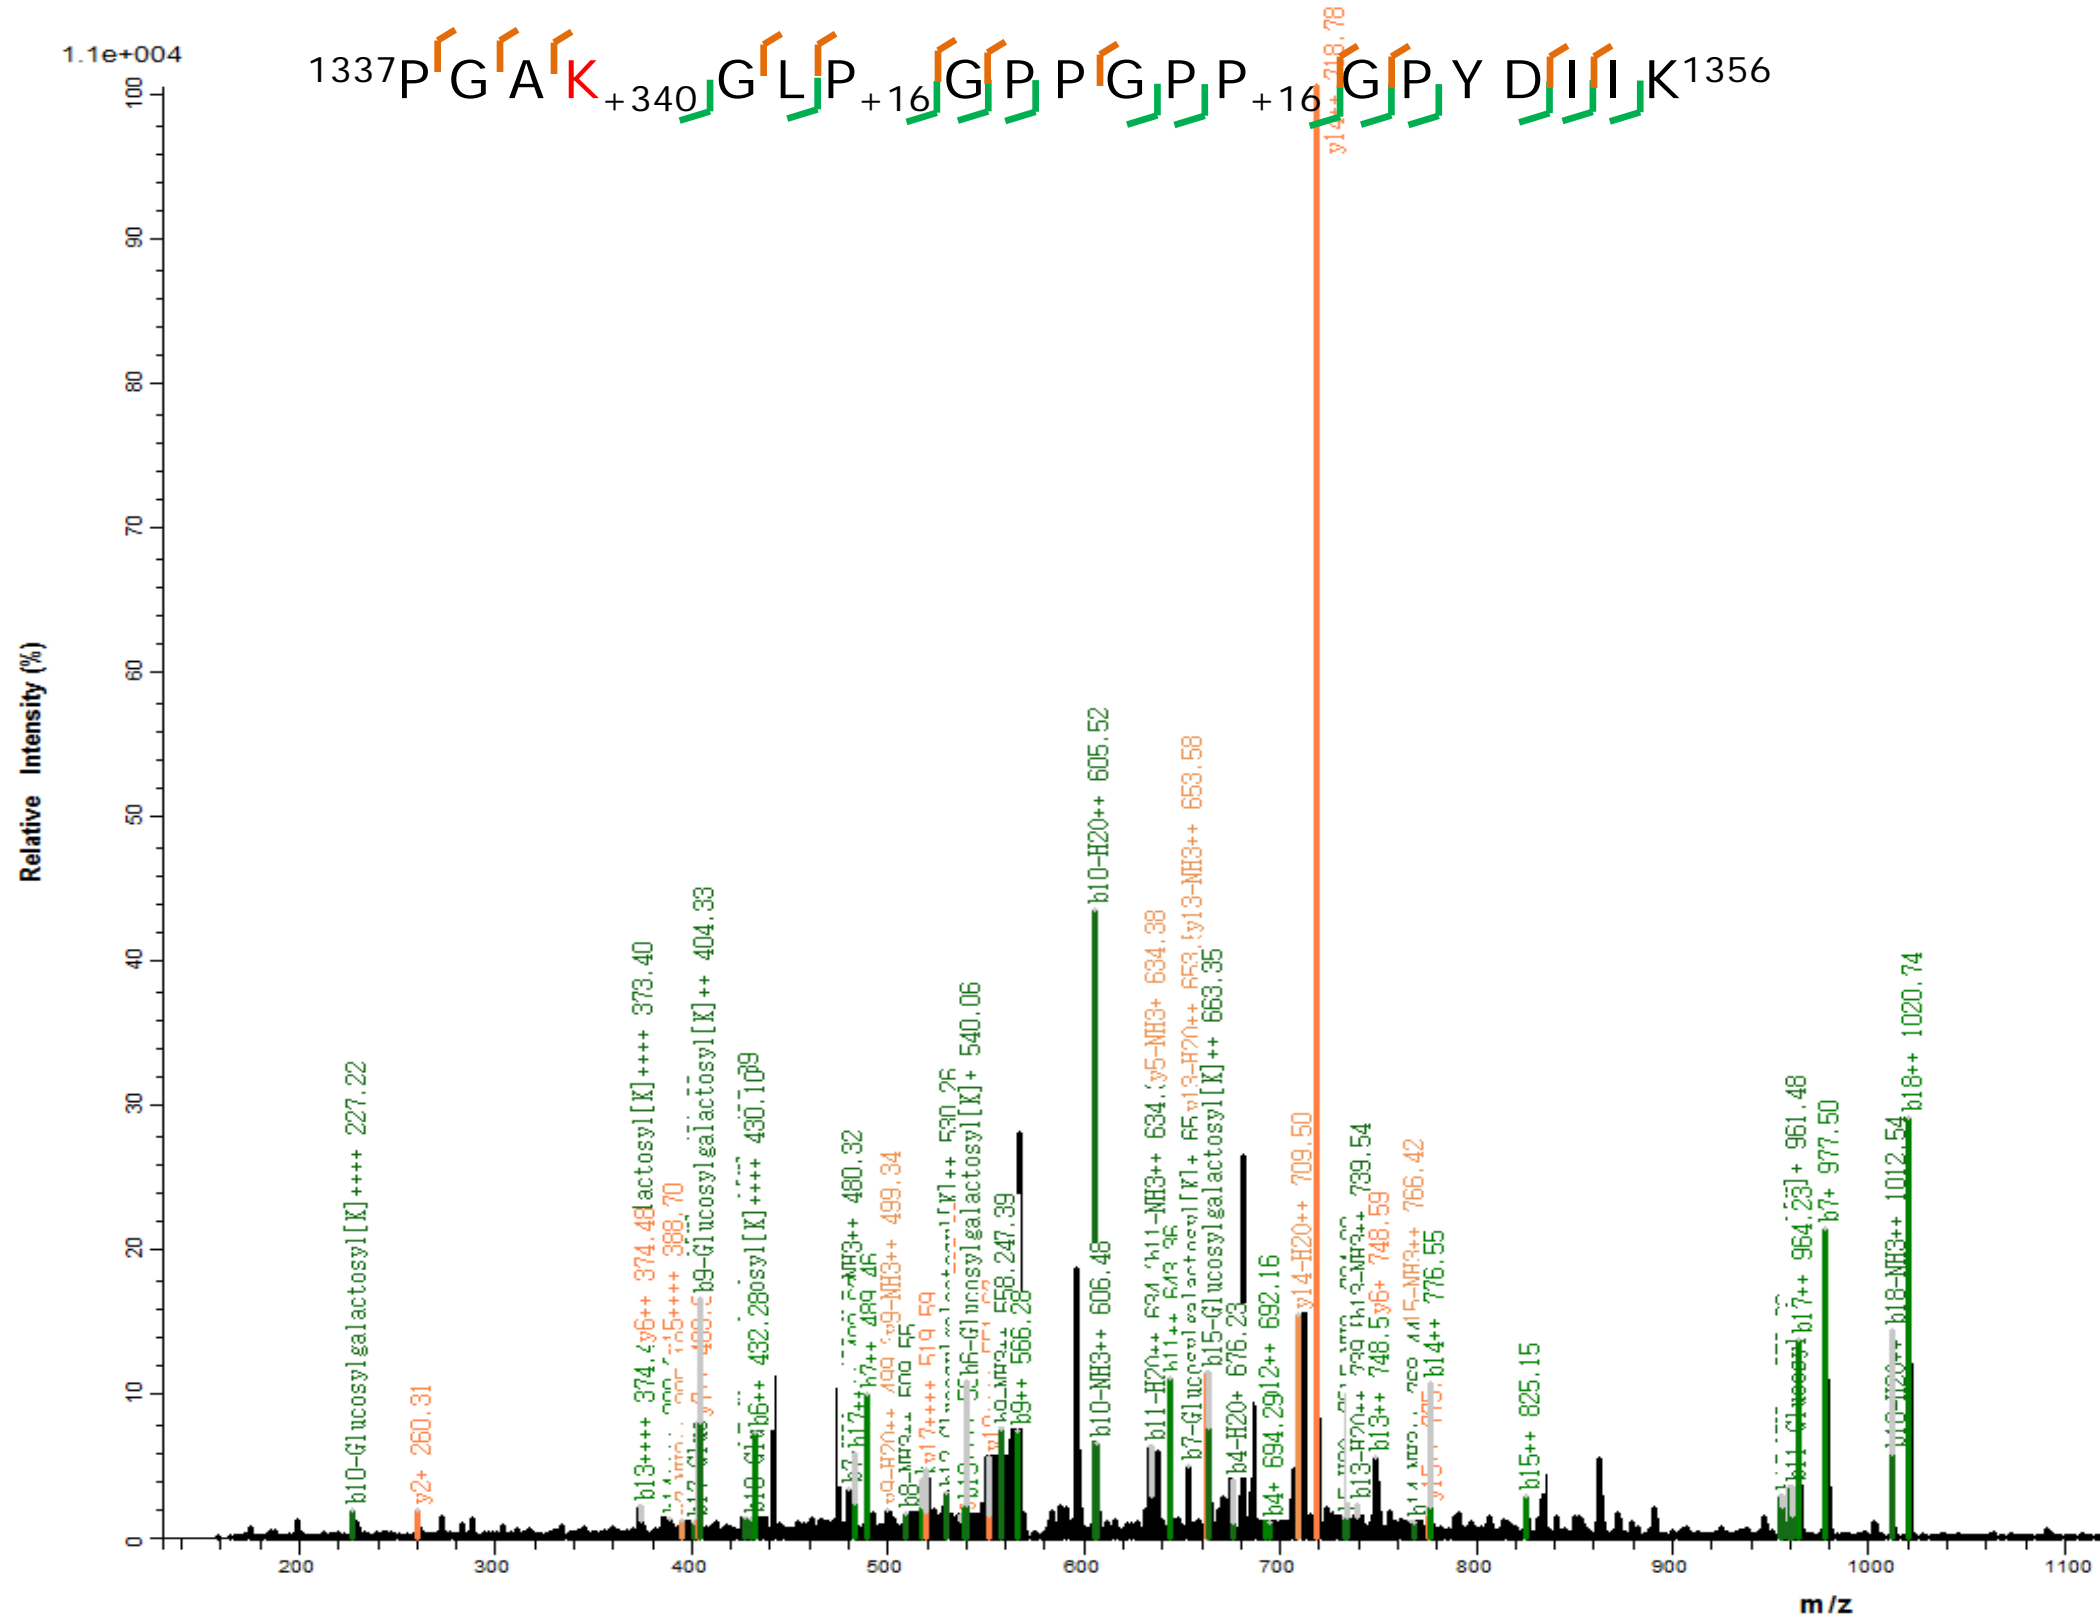

m/z = 957.6498(+5)

PSM showing the identification of HyP<sup>71</sup> and 3-HyP<sup>74</sup>

Human col4a1 chain

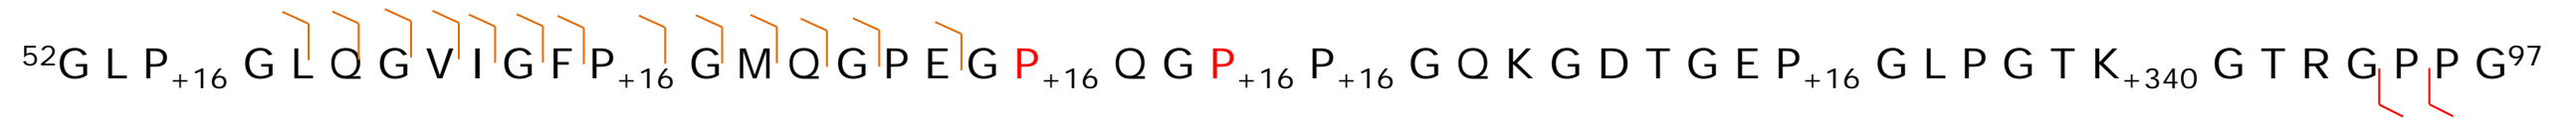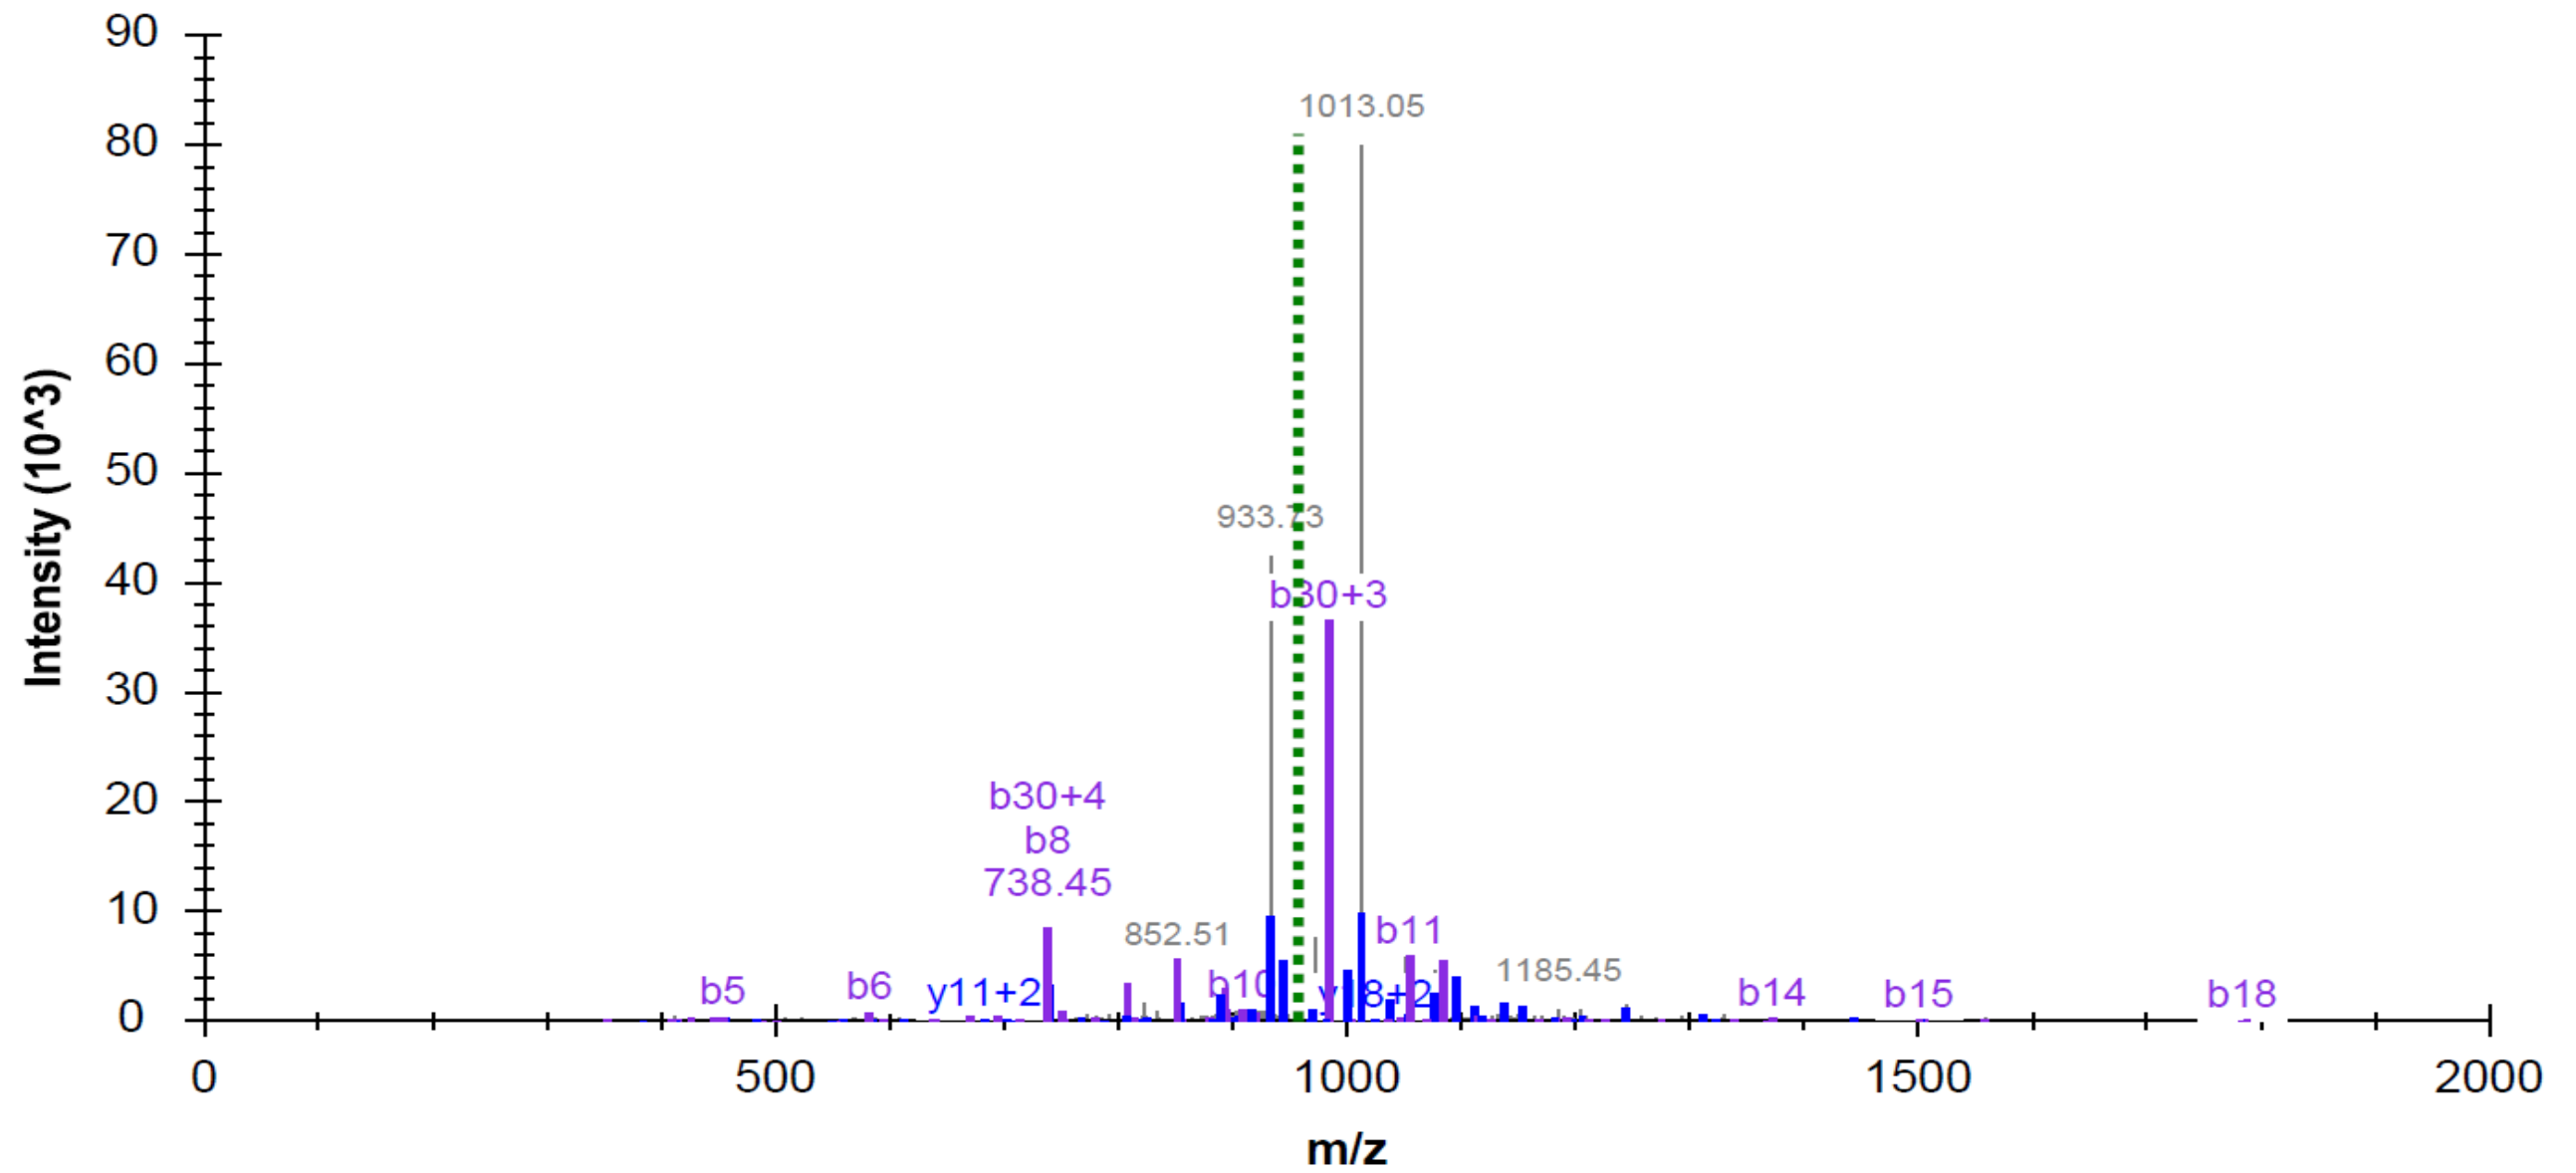

m/z = 957.63(+6)

PSM showing the identification of 3-Hyp<sup>74</sup>

Human col4a1 chain

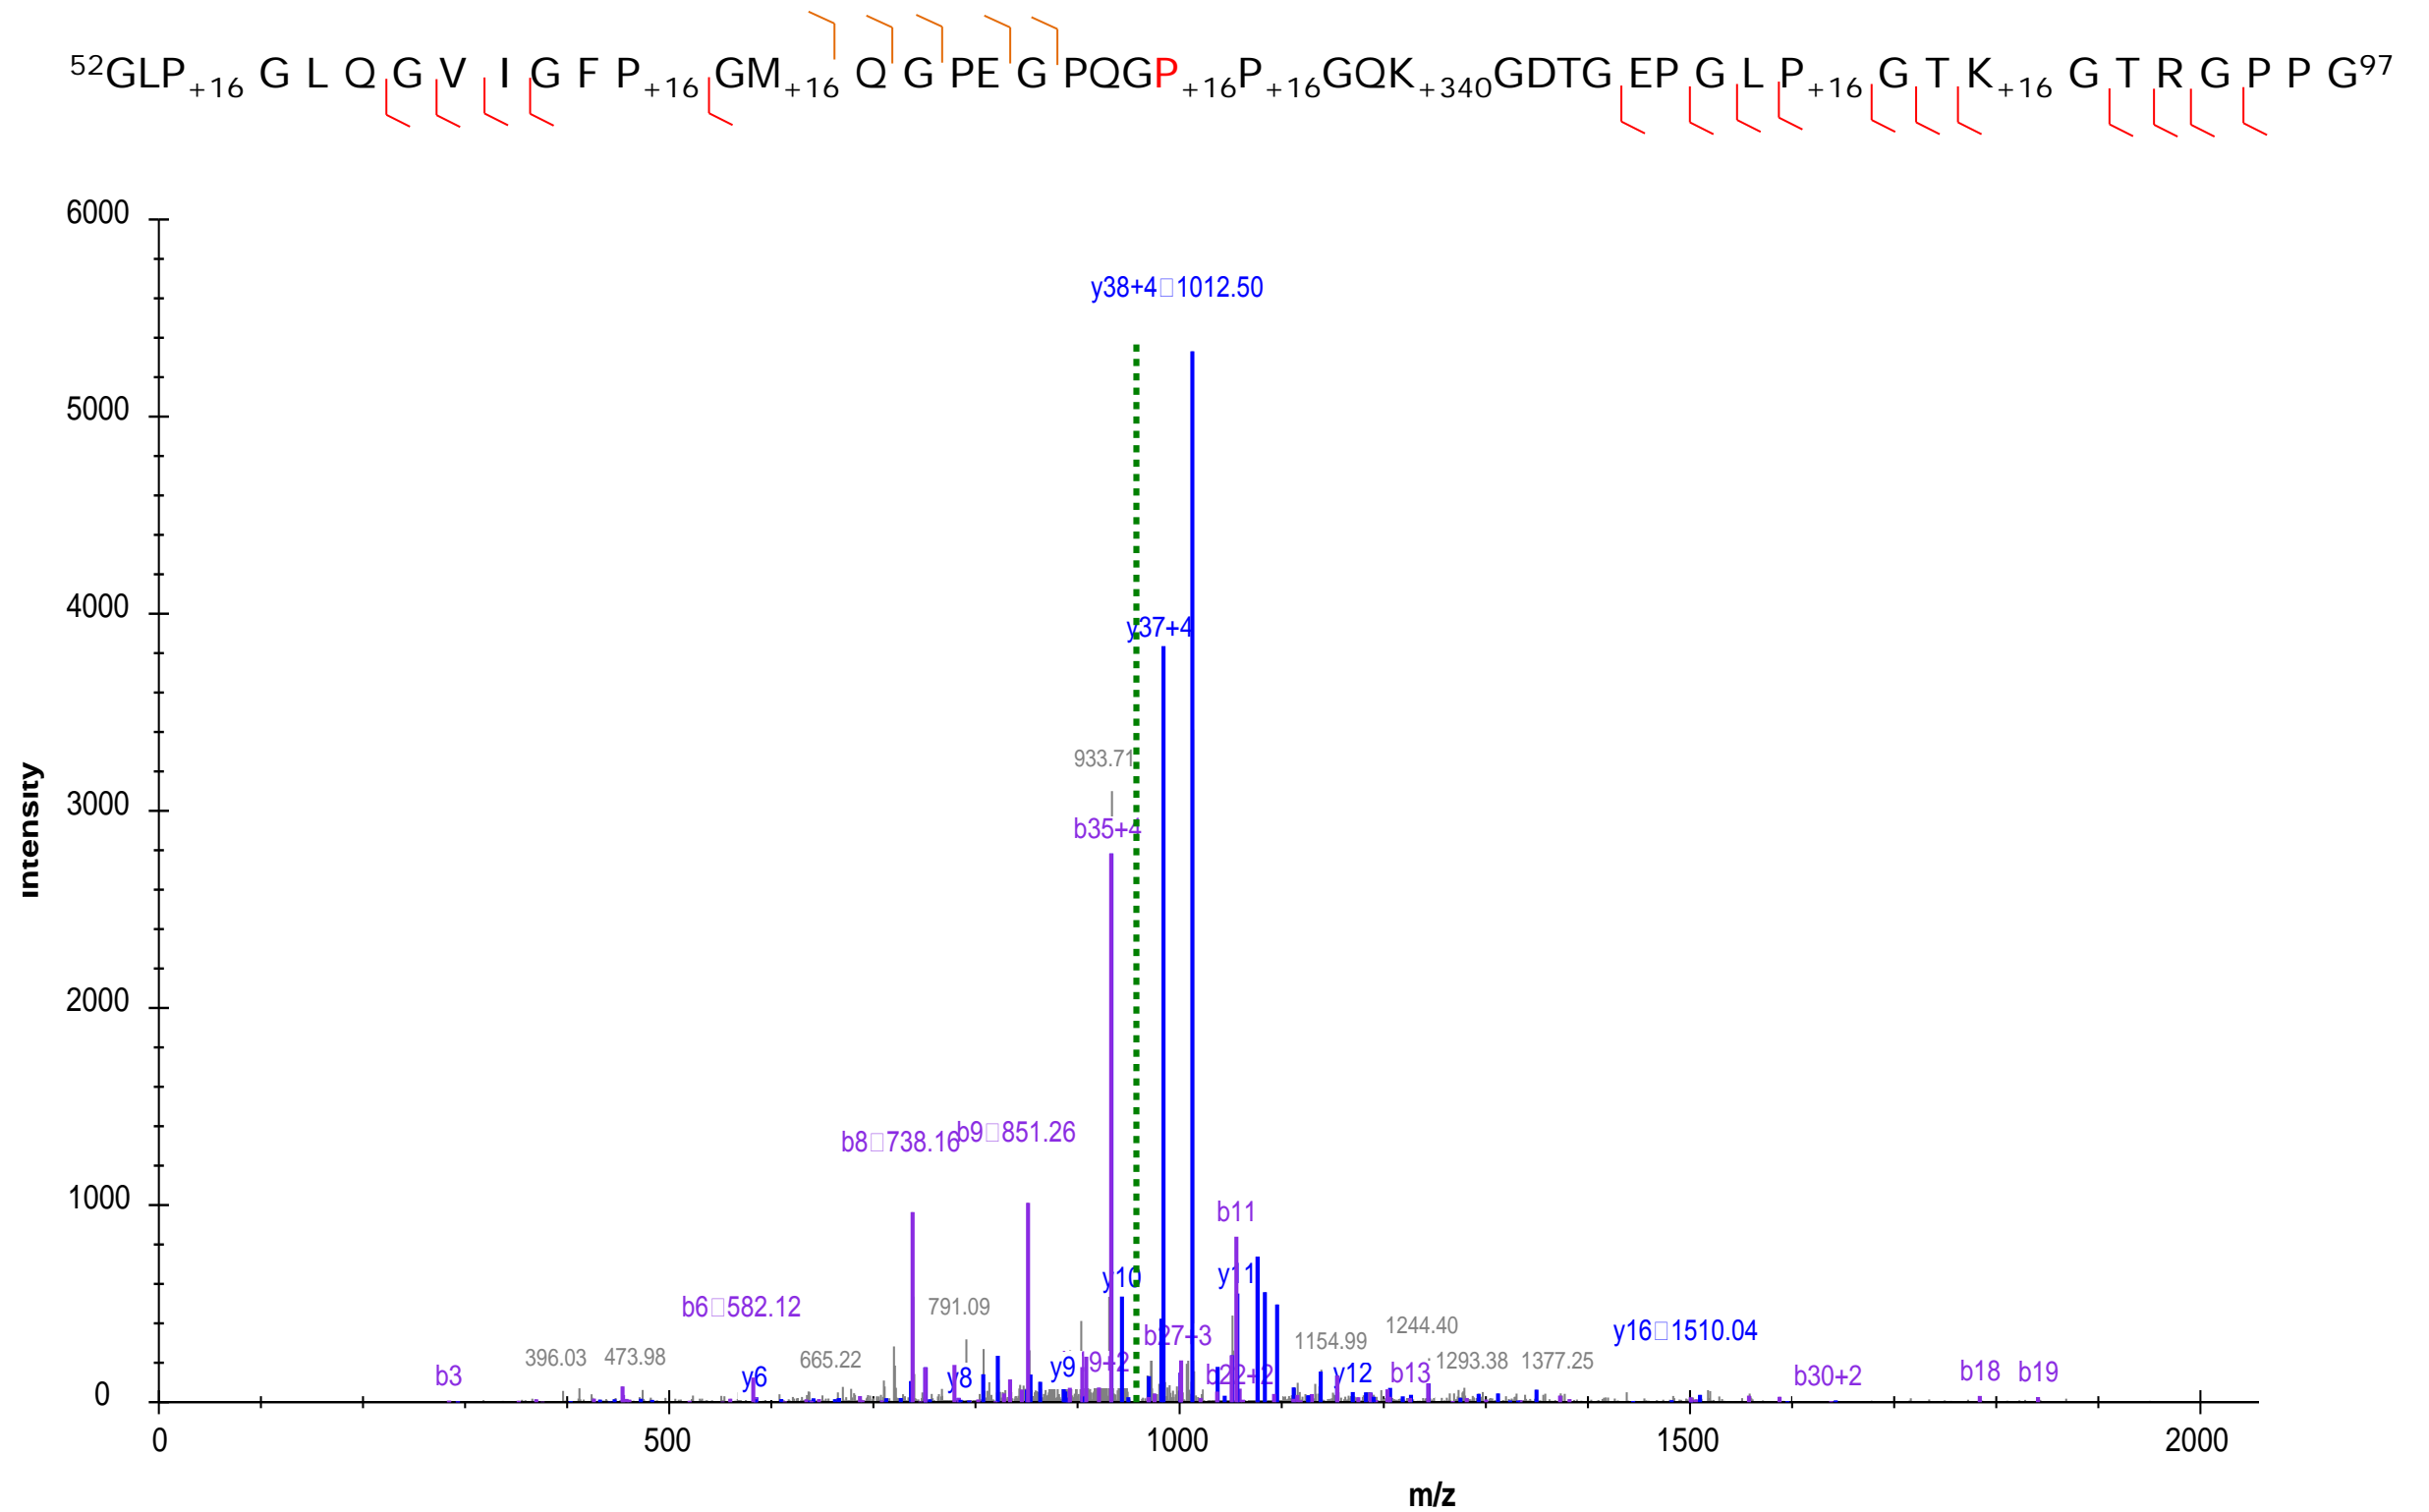

m/z = 1200.8142 (+4)

PSM showing the identification of 3-Hyp<sup>95</sup>

Human col4a1 chain

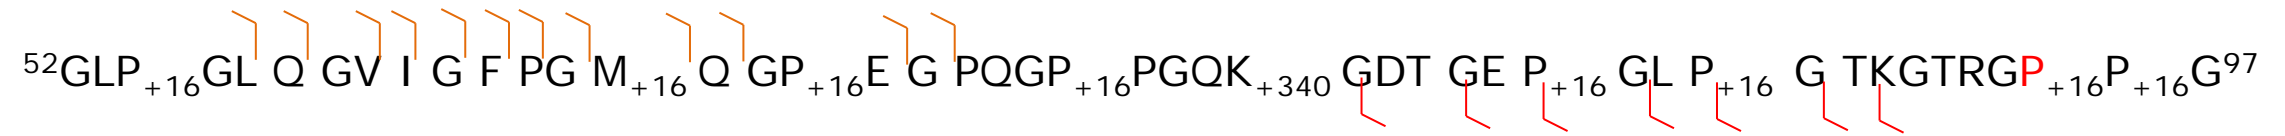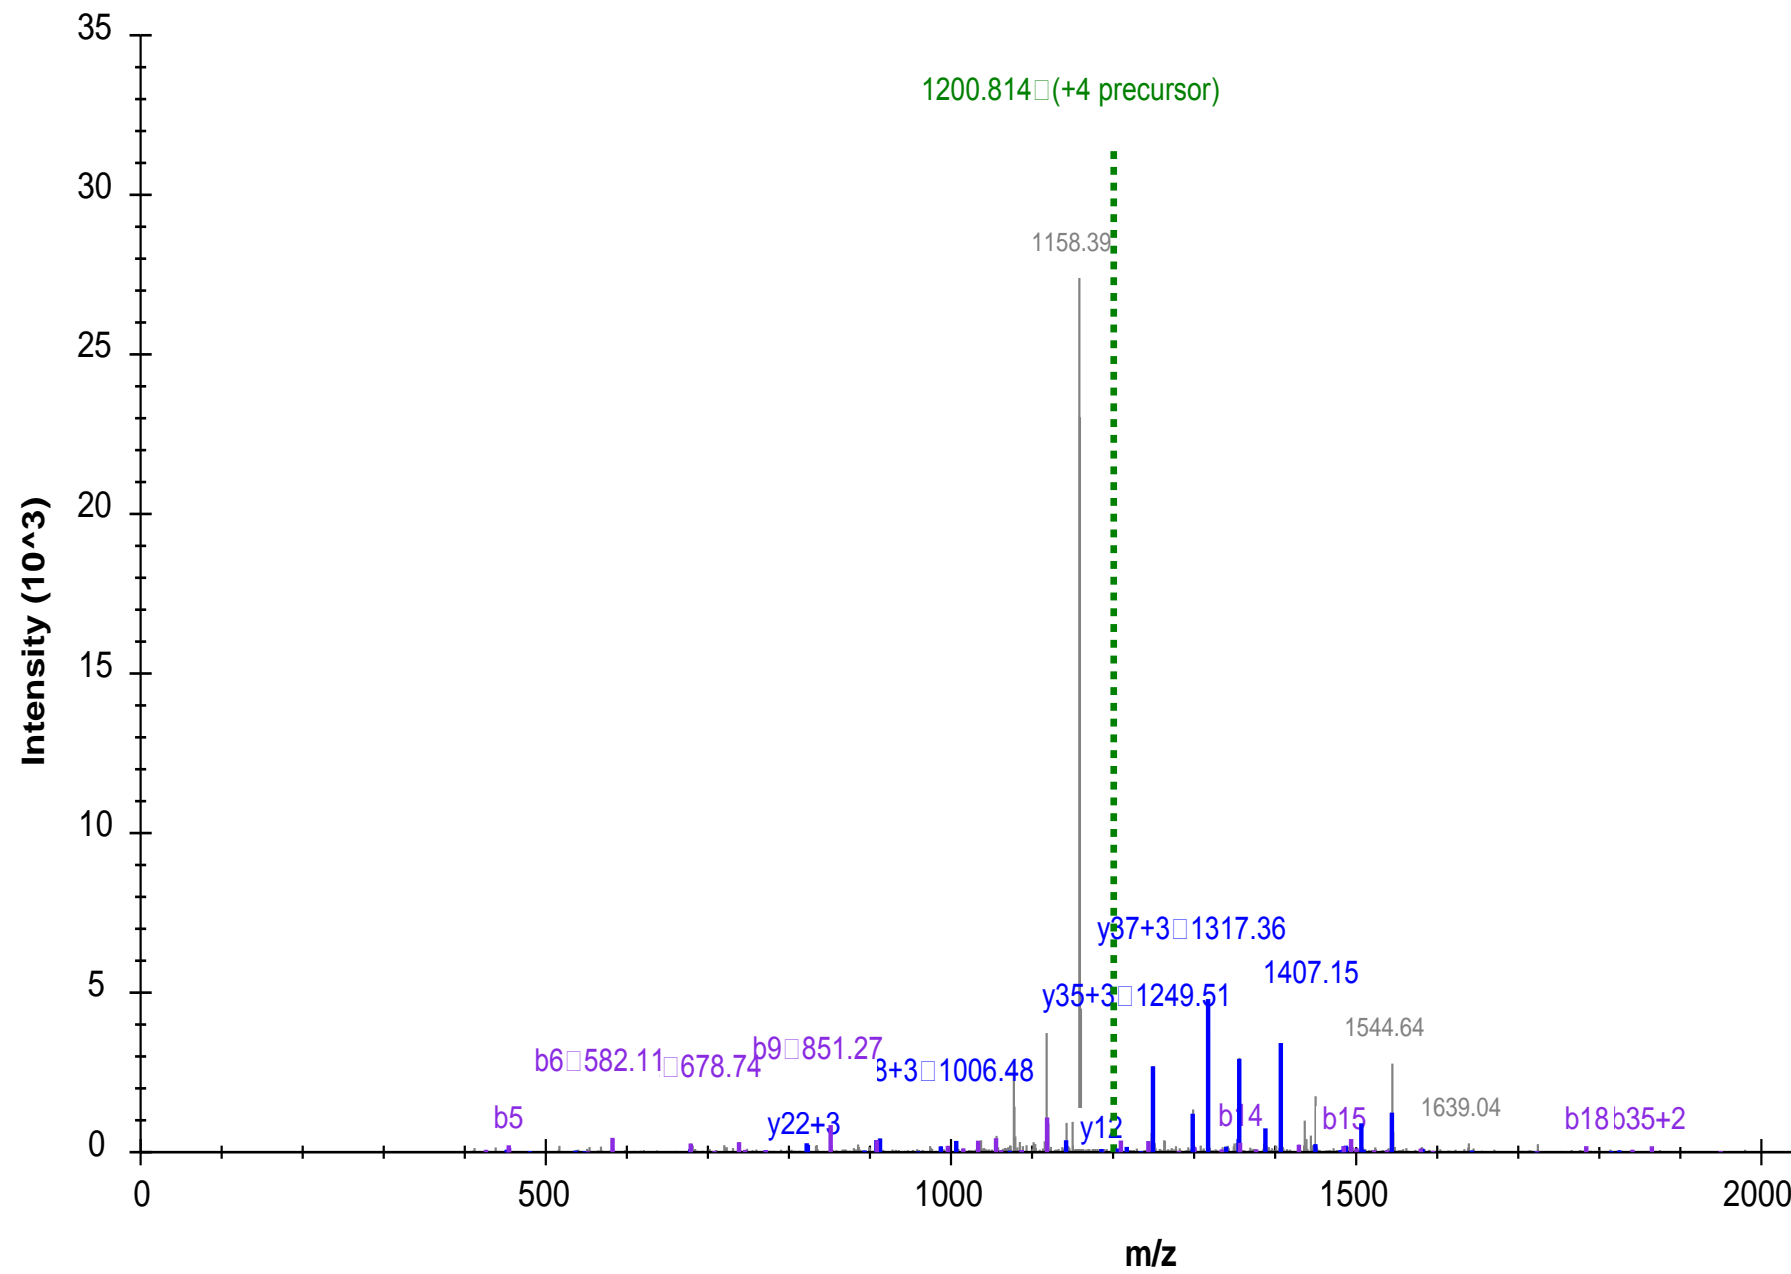

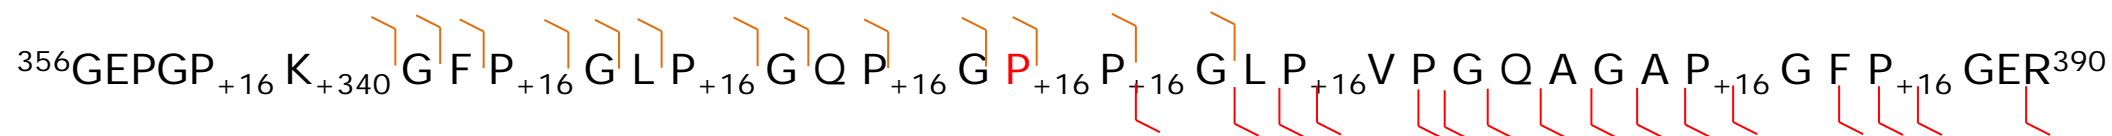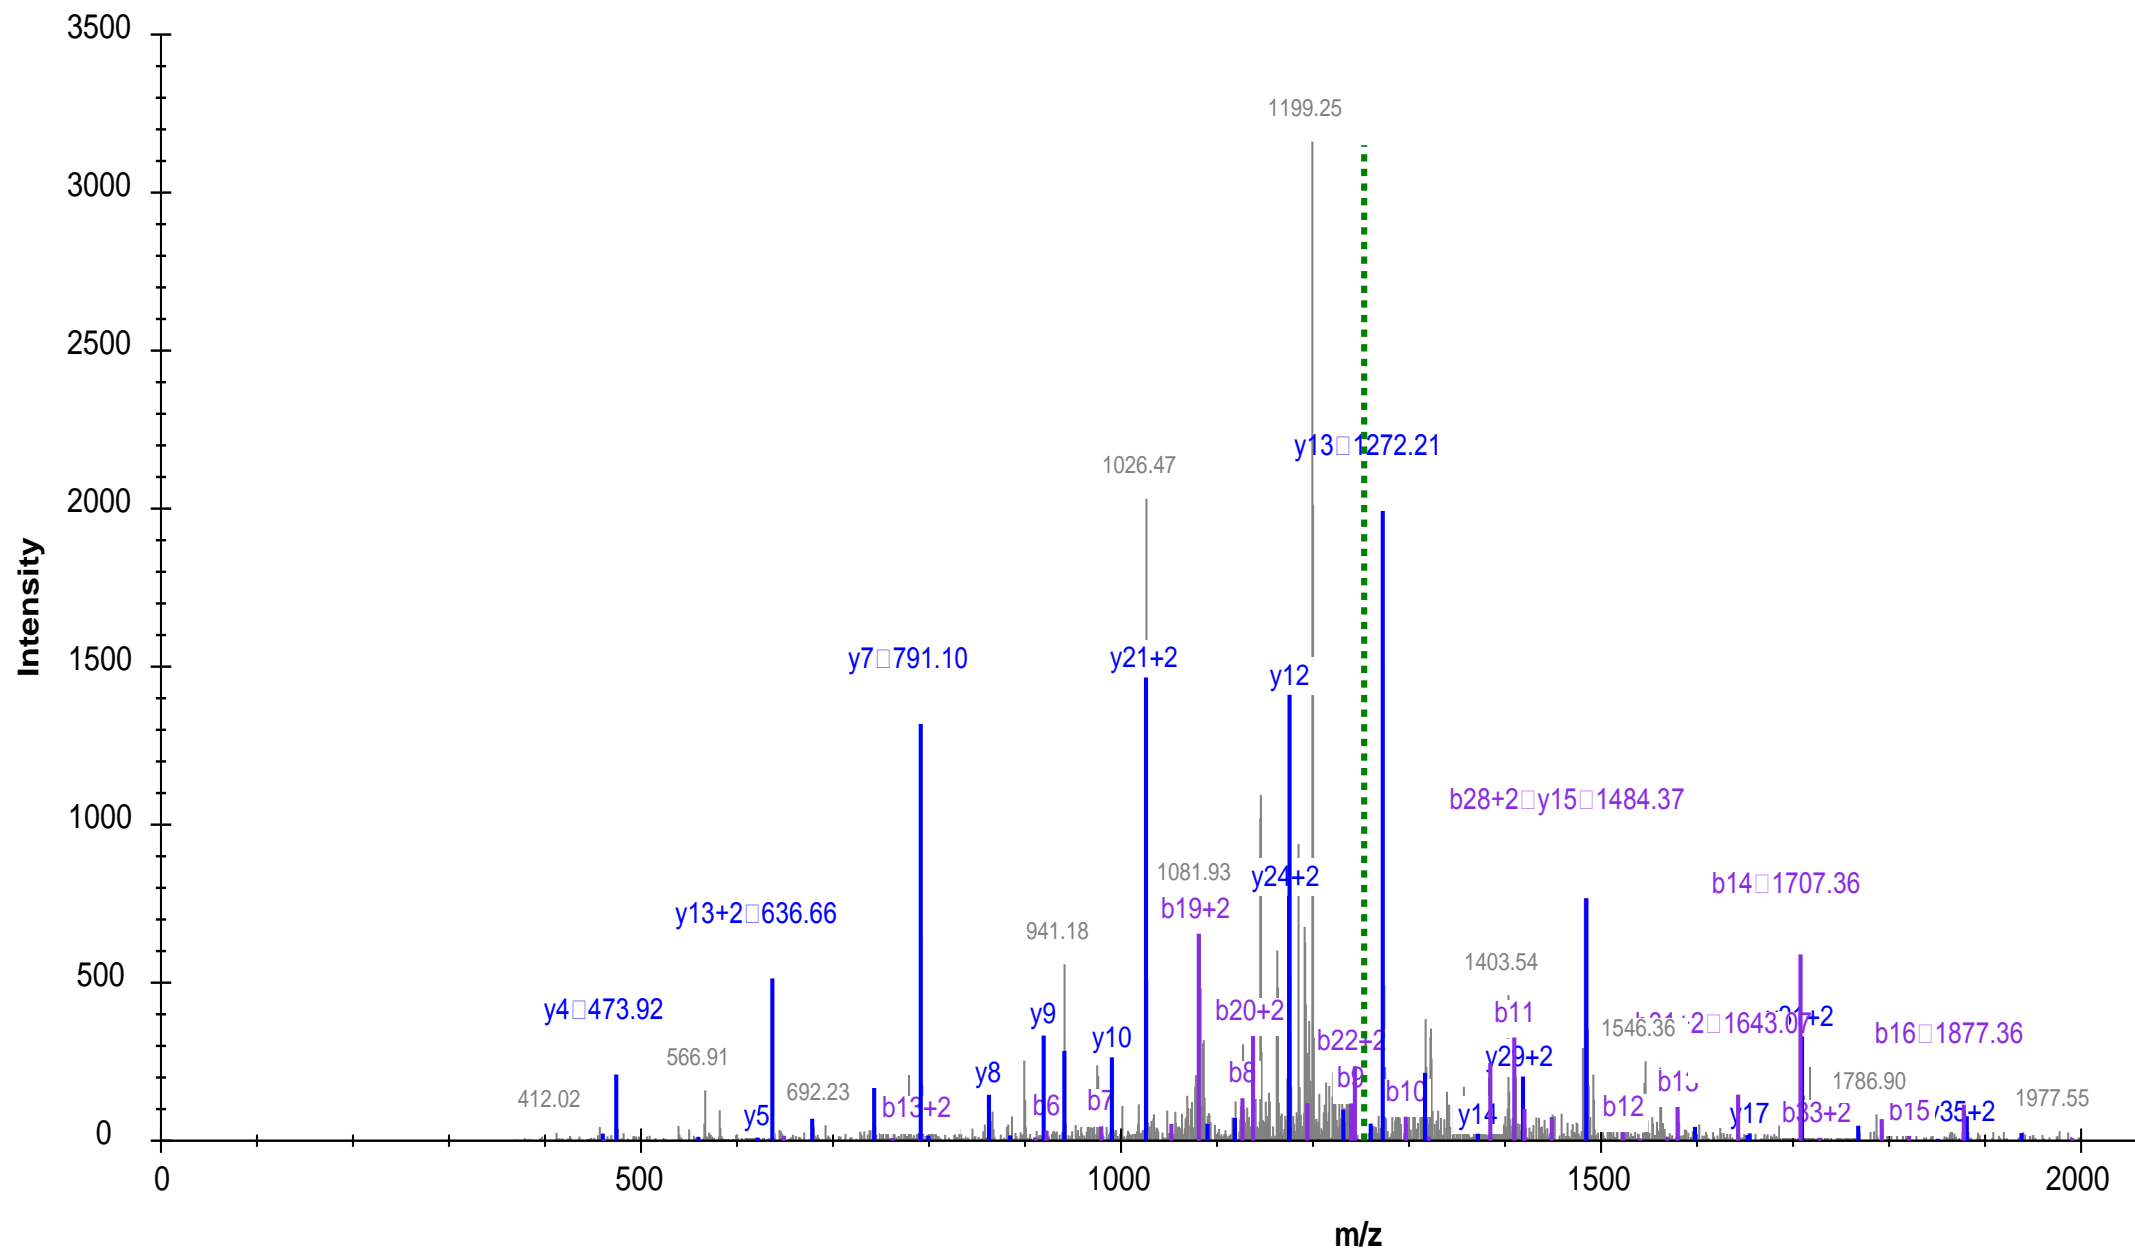

m/z = 889.1826(+4)

PSM showing the identification of 3-Hyp<sup>421</sup>

Human col4a1 chain

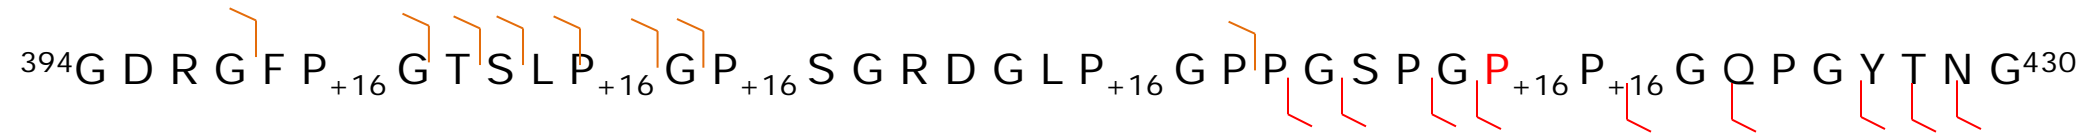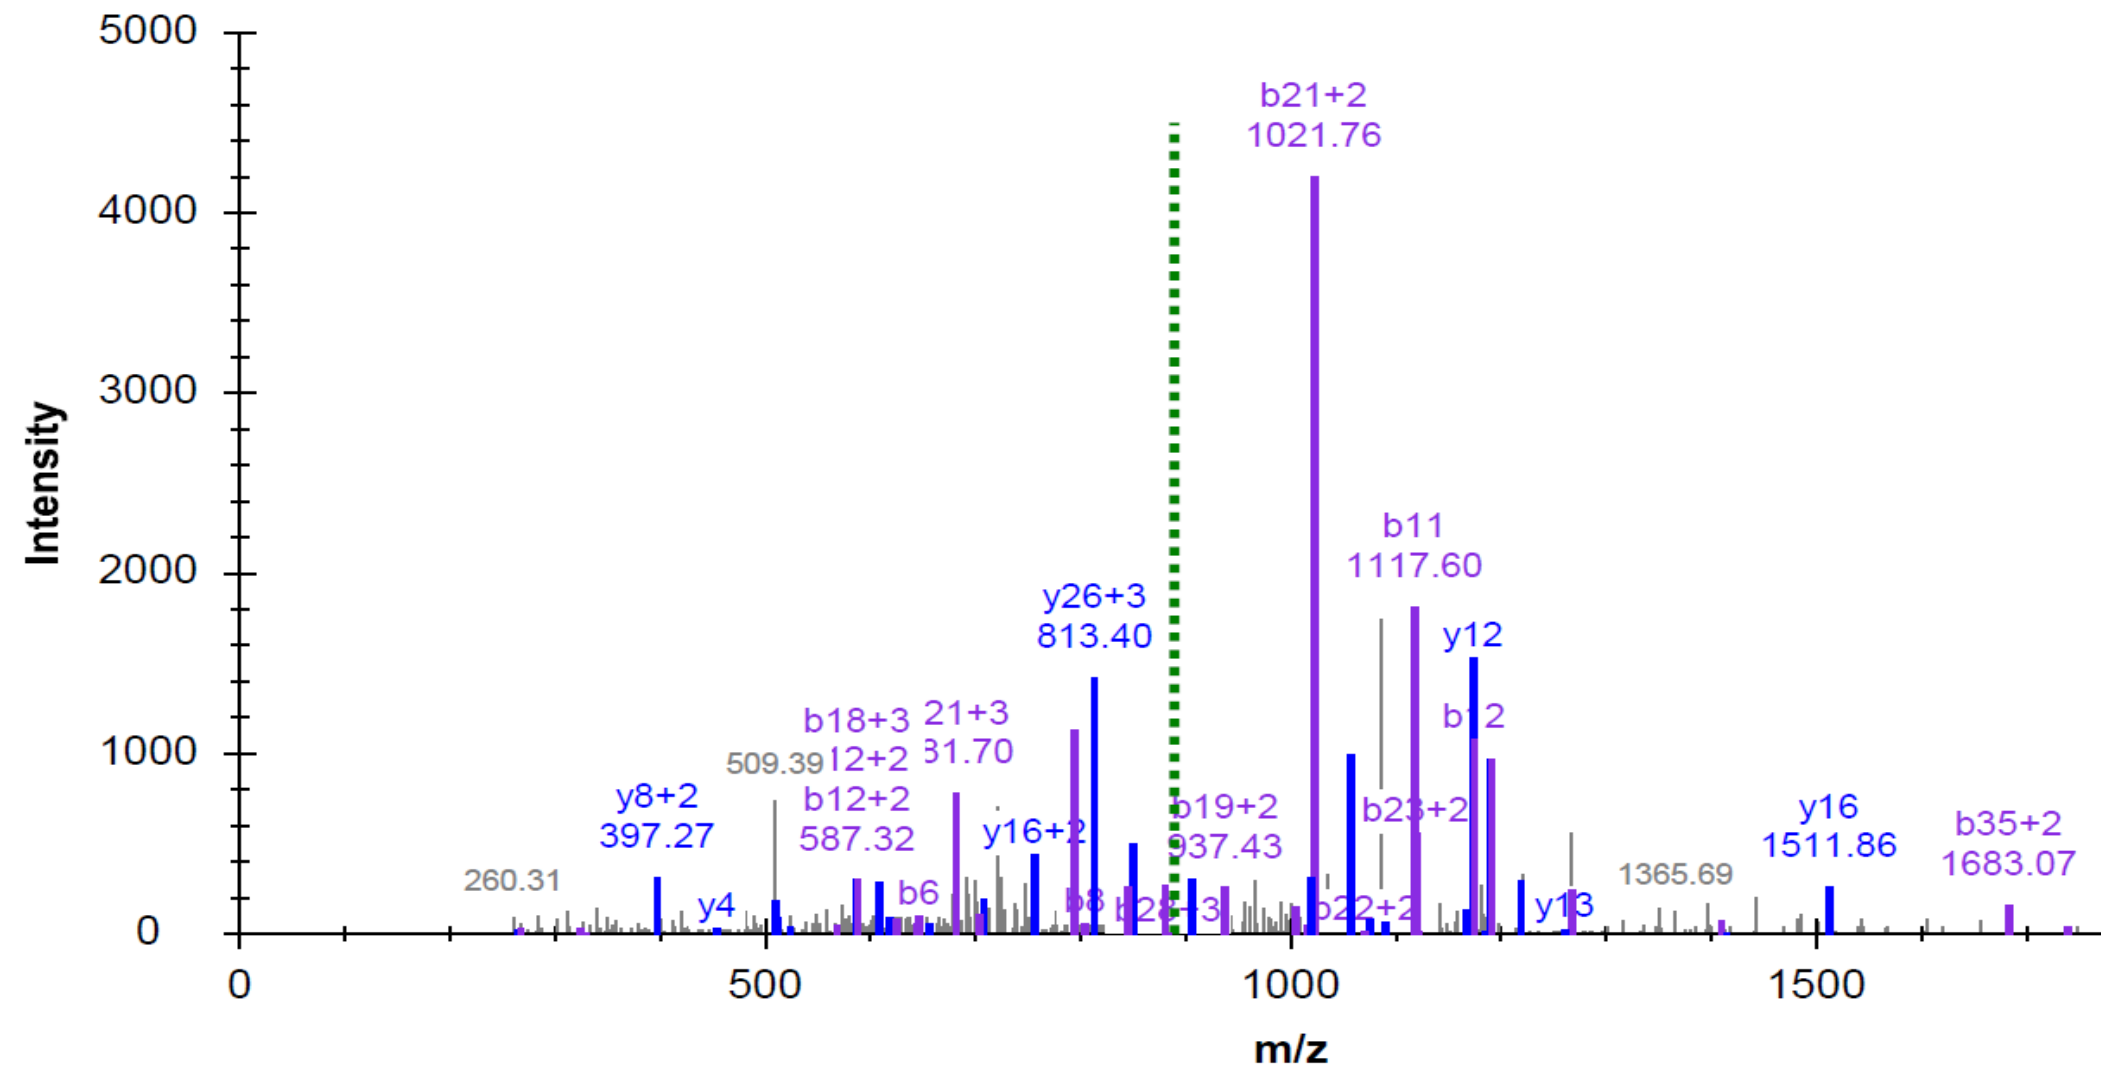

m/z = 886.748 (+3)

PSM showing the identification of 3-Hyp<sup>478</sup>

Human col4a1 chain

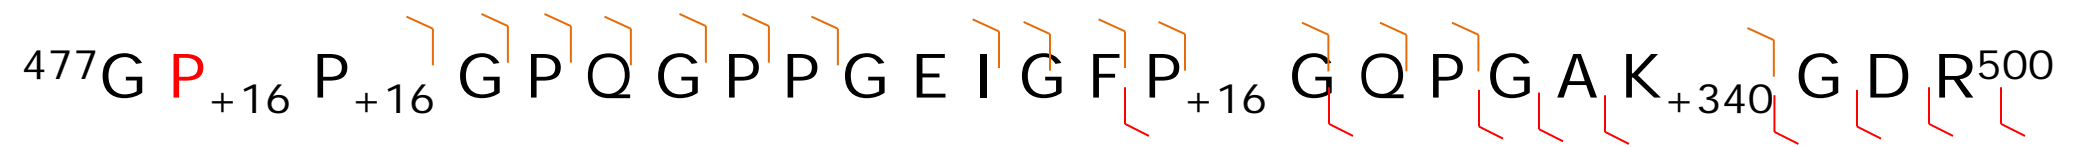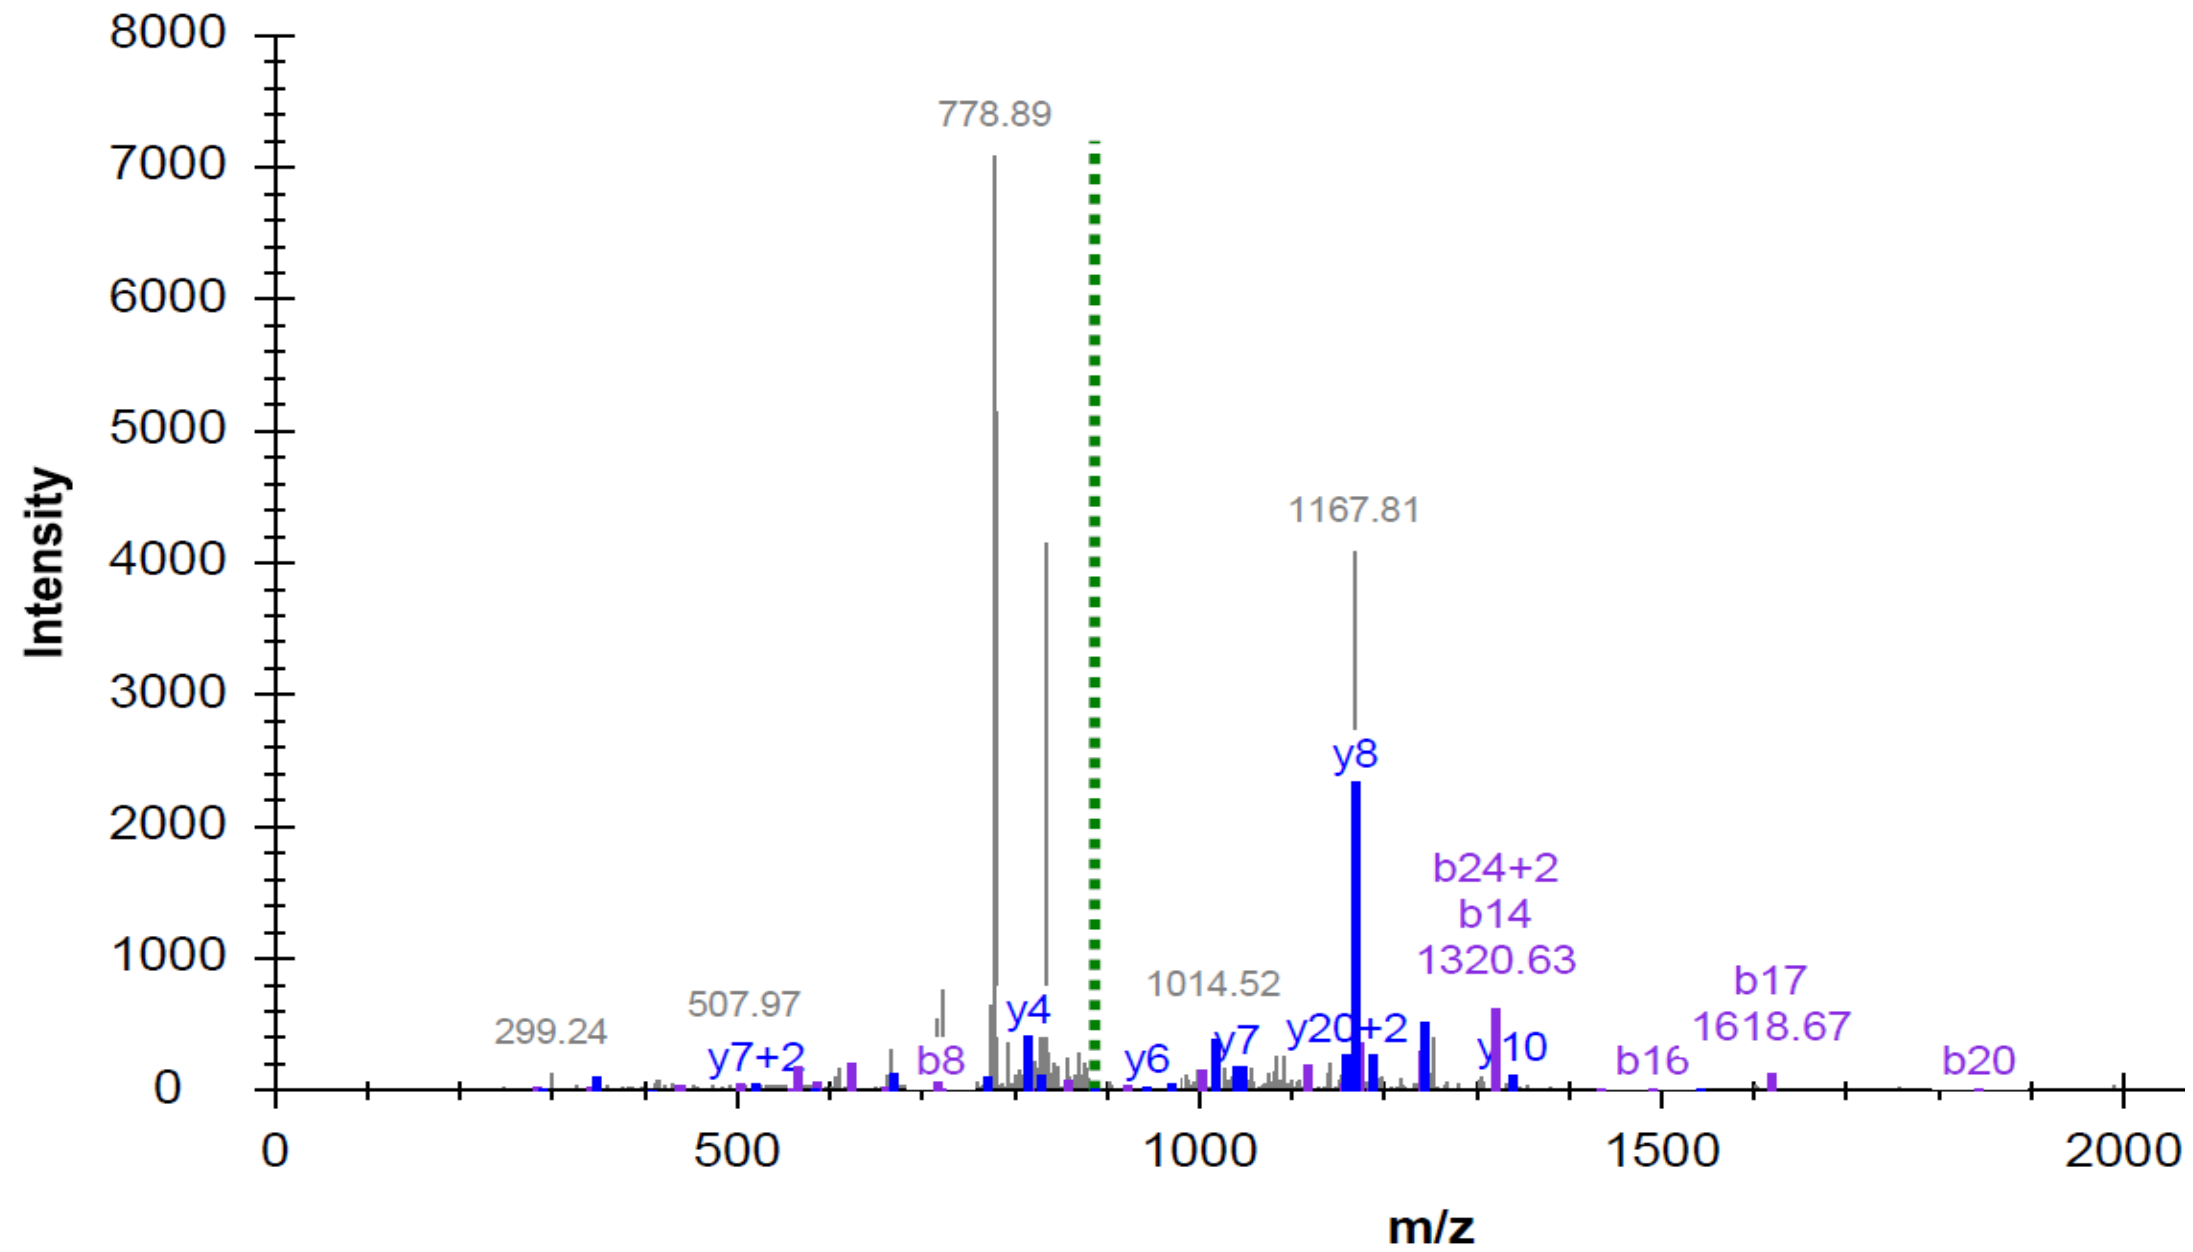

m/z = 902.7432 (+3)

PSM showing the identification of 3-Hyp<sup>478,484</sup>

Human col4a1 chain

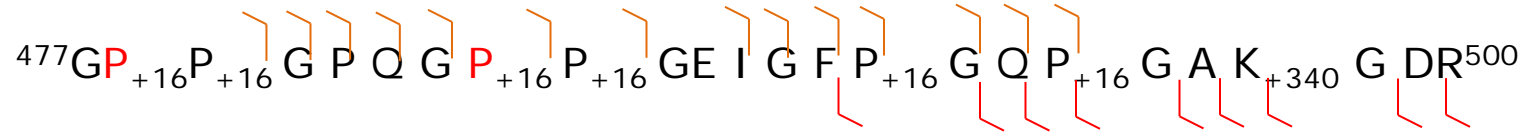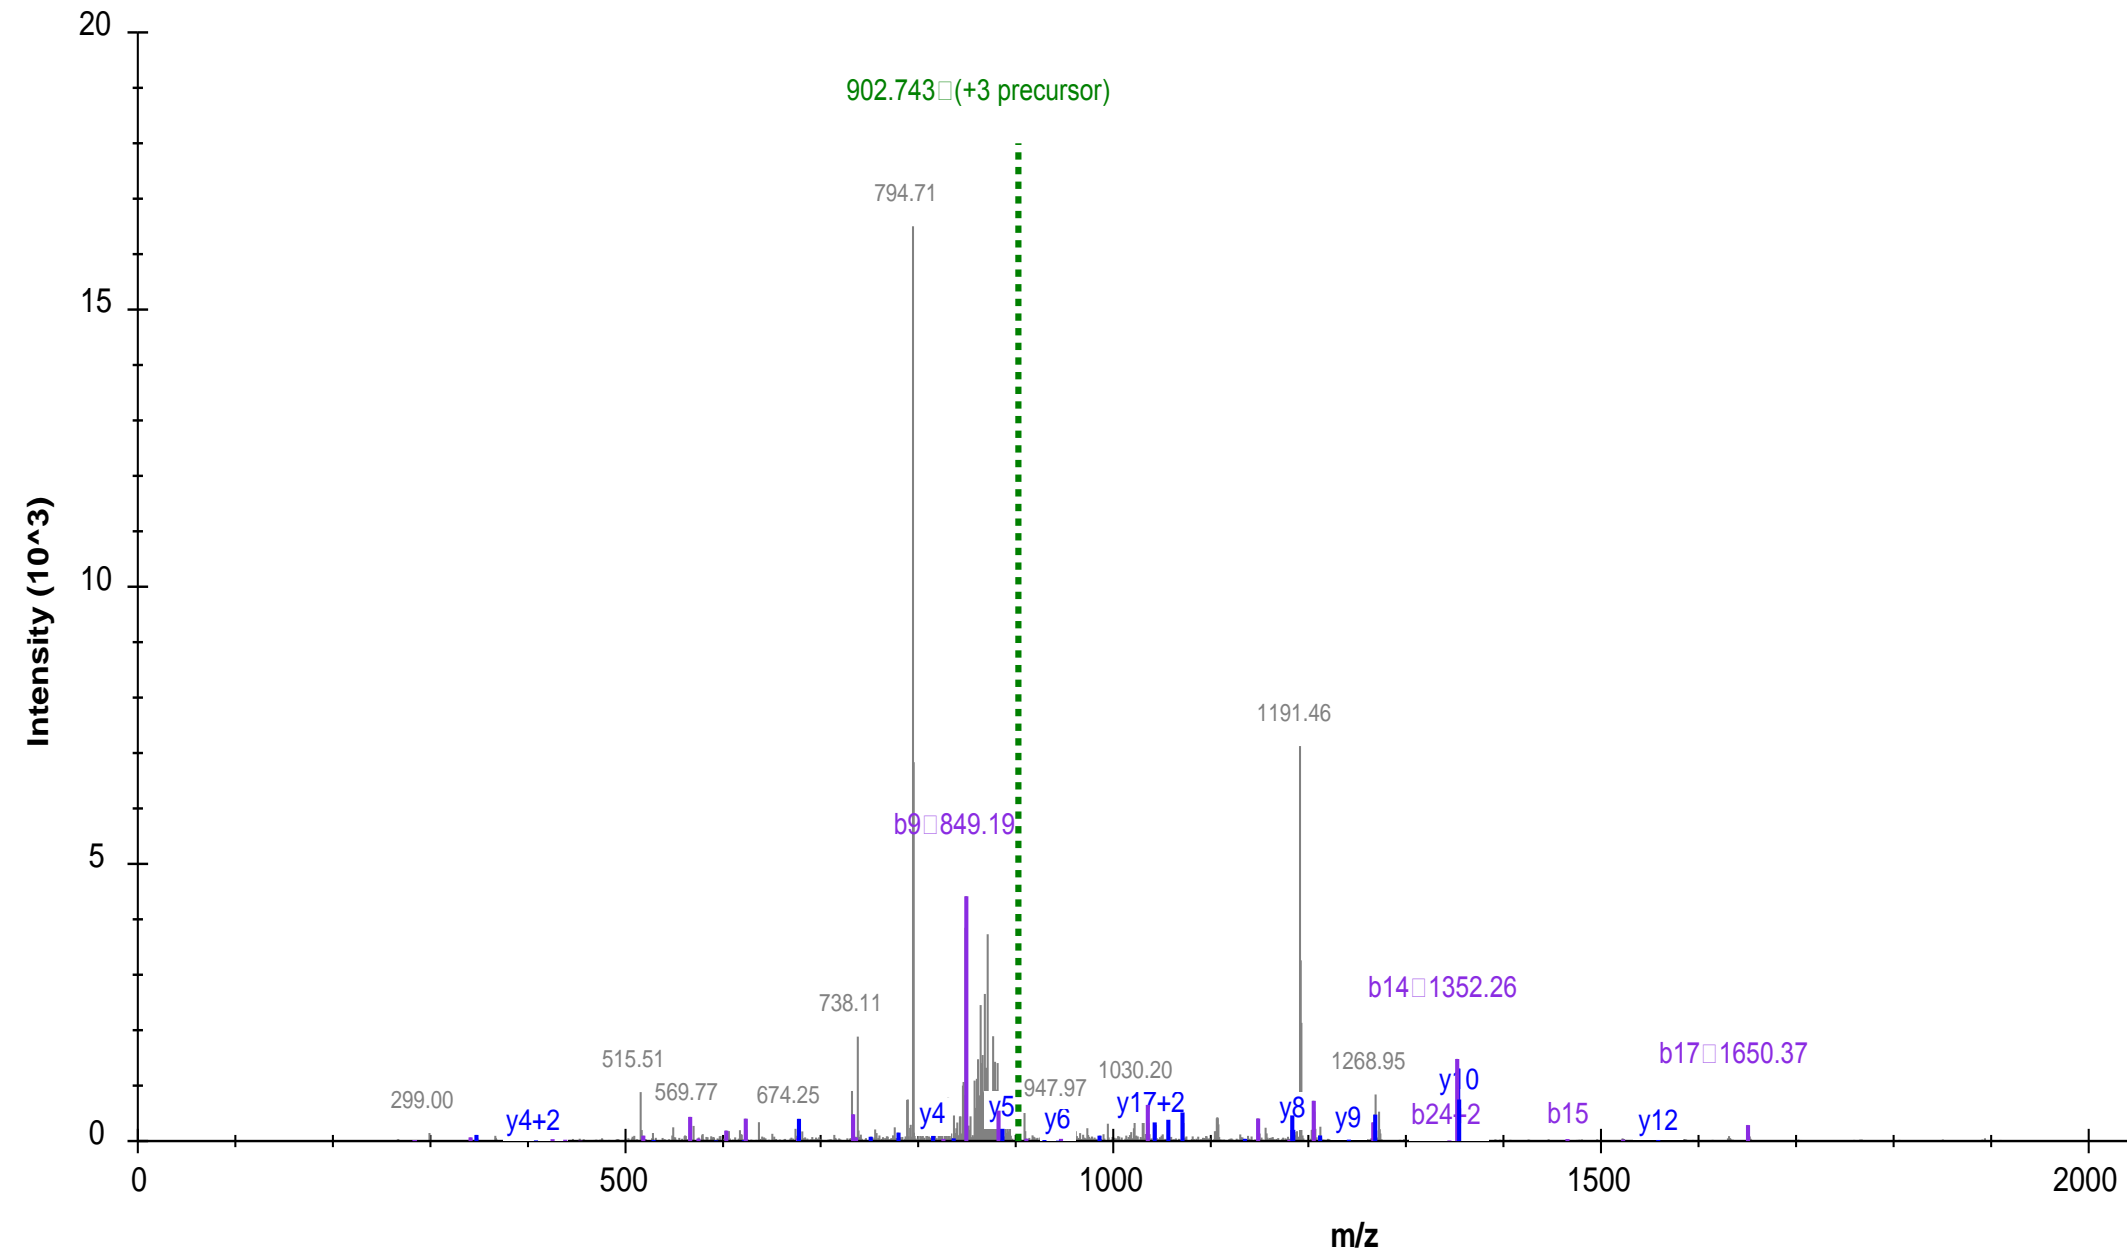



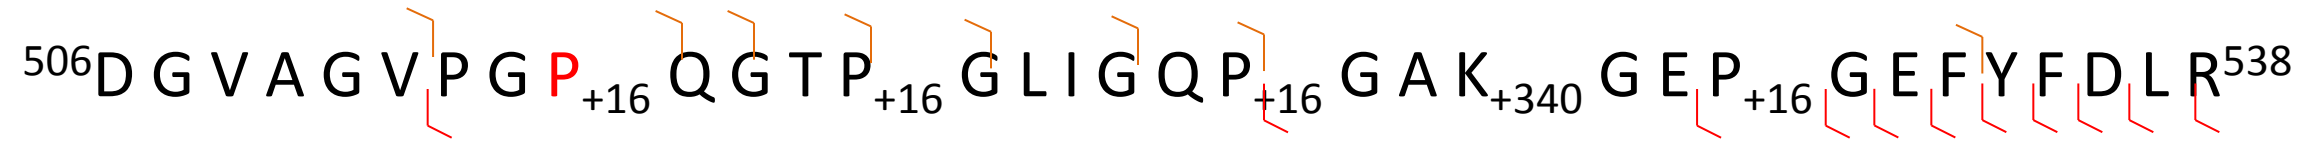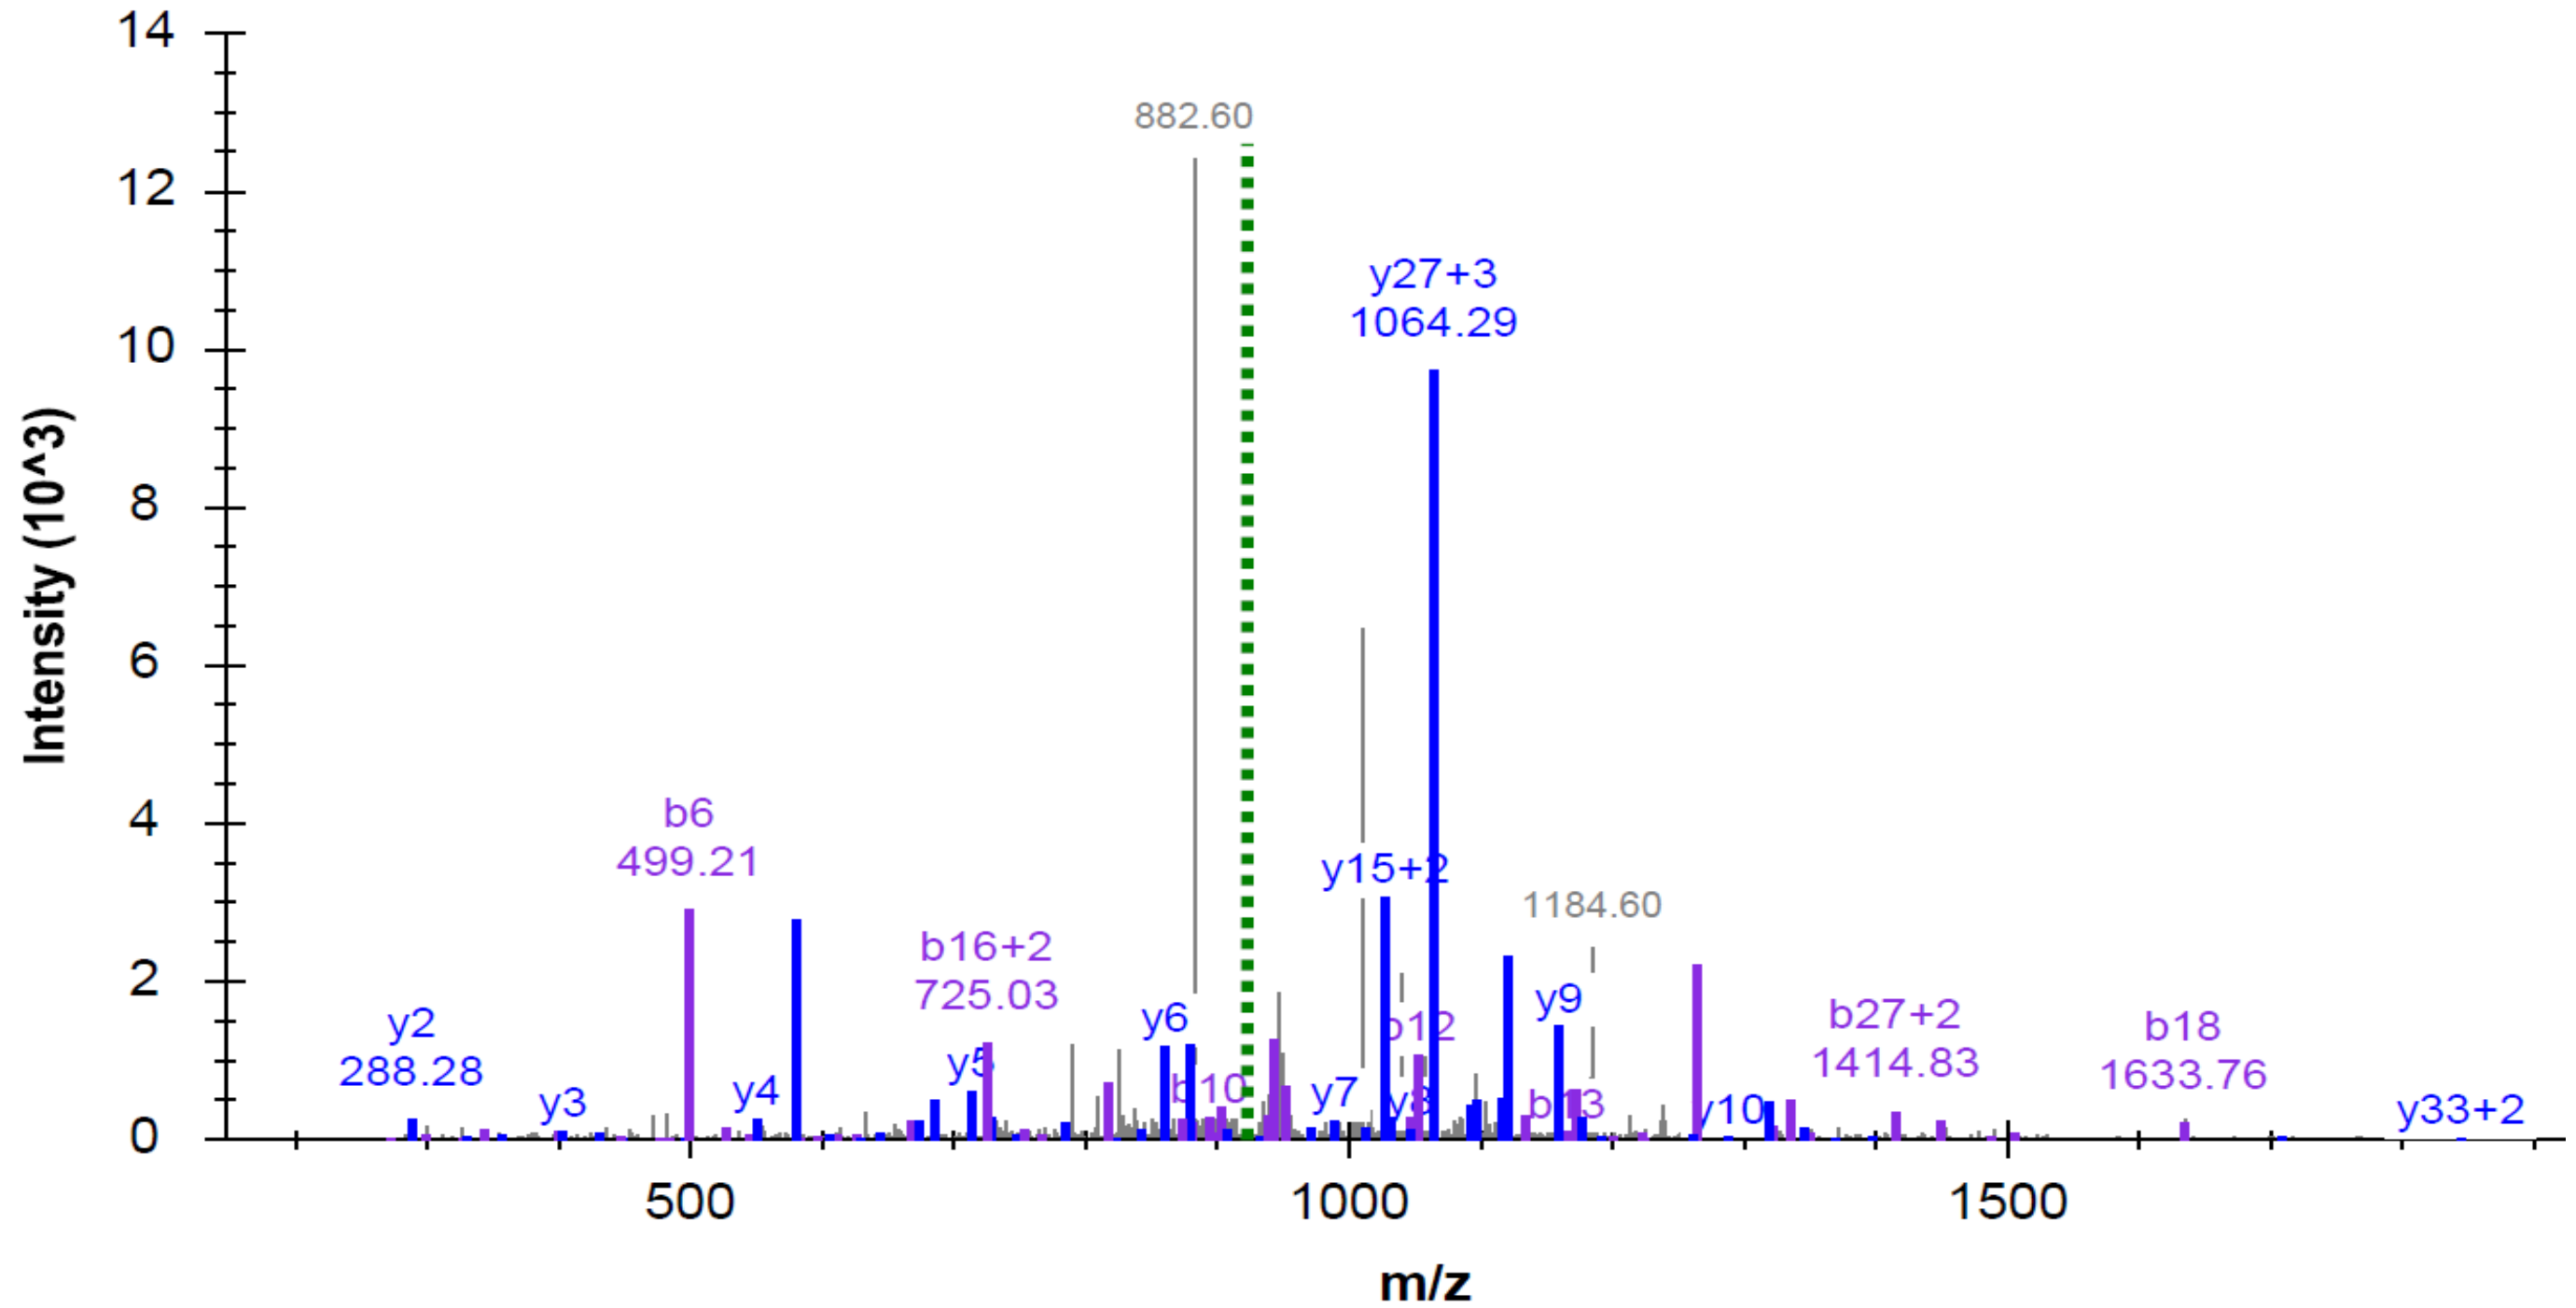

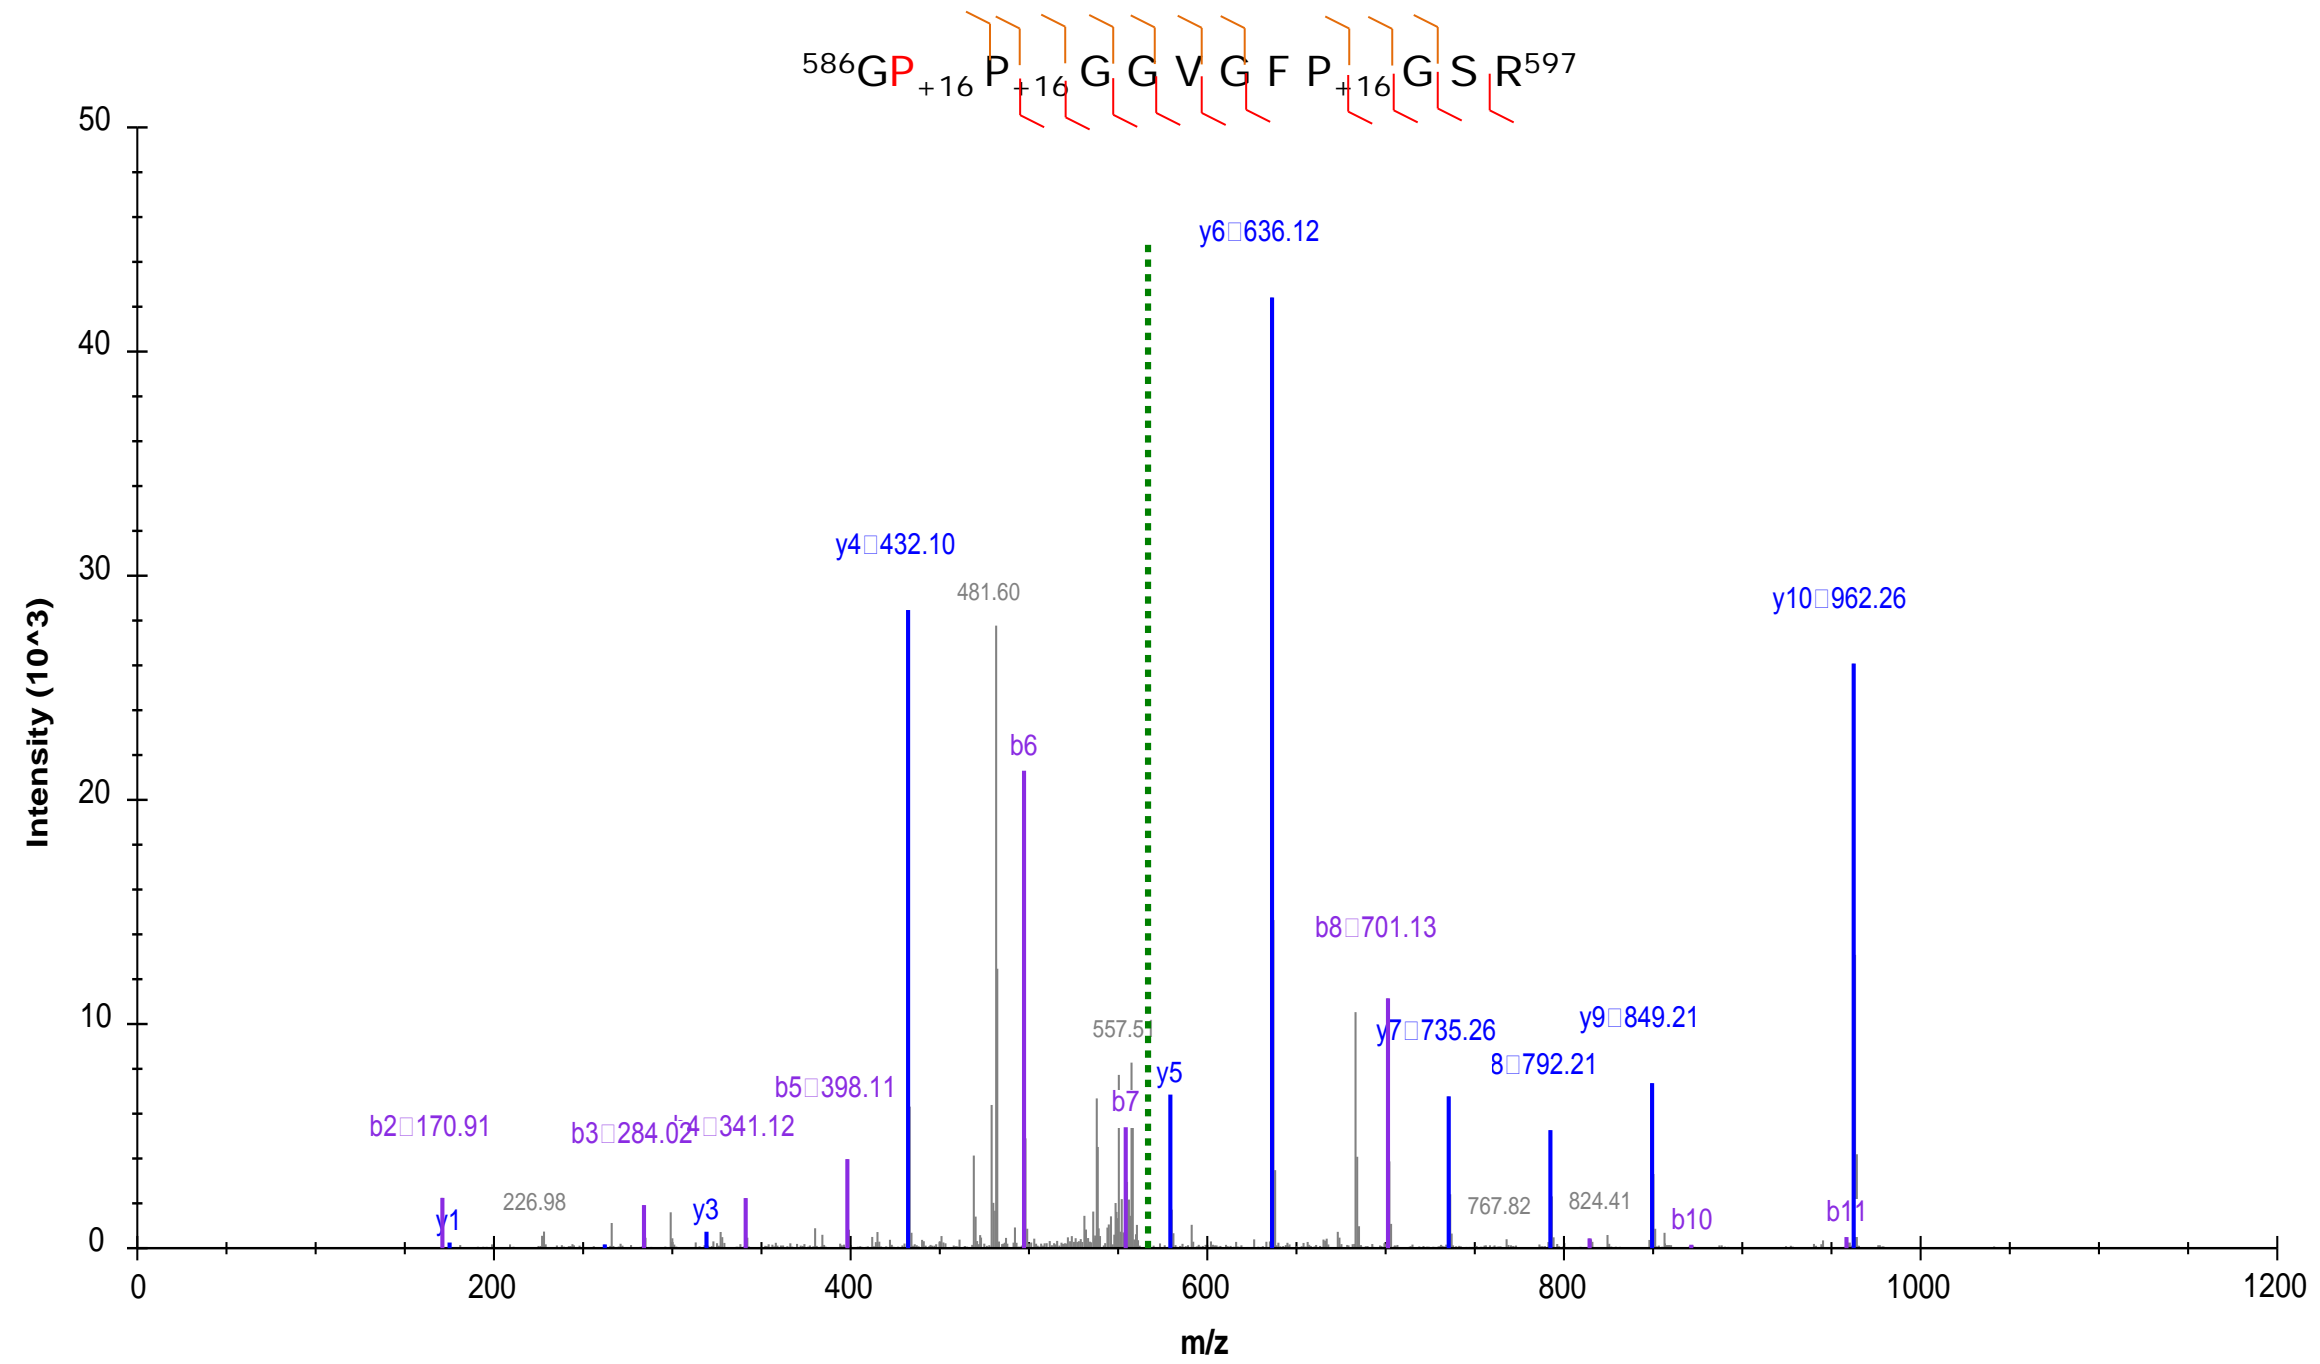

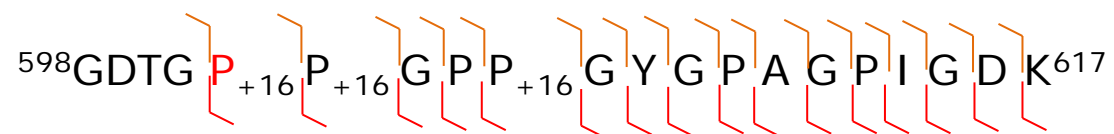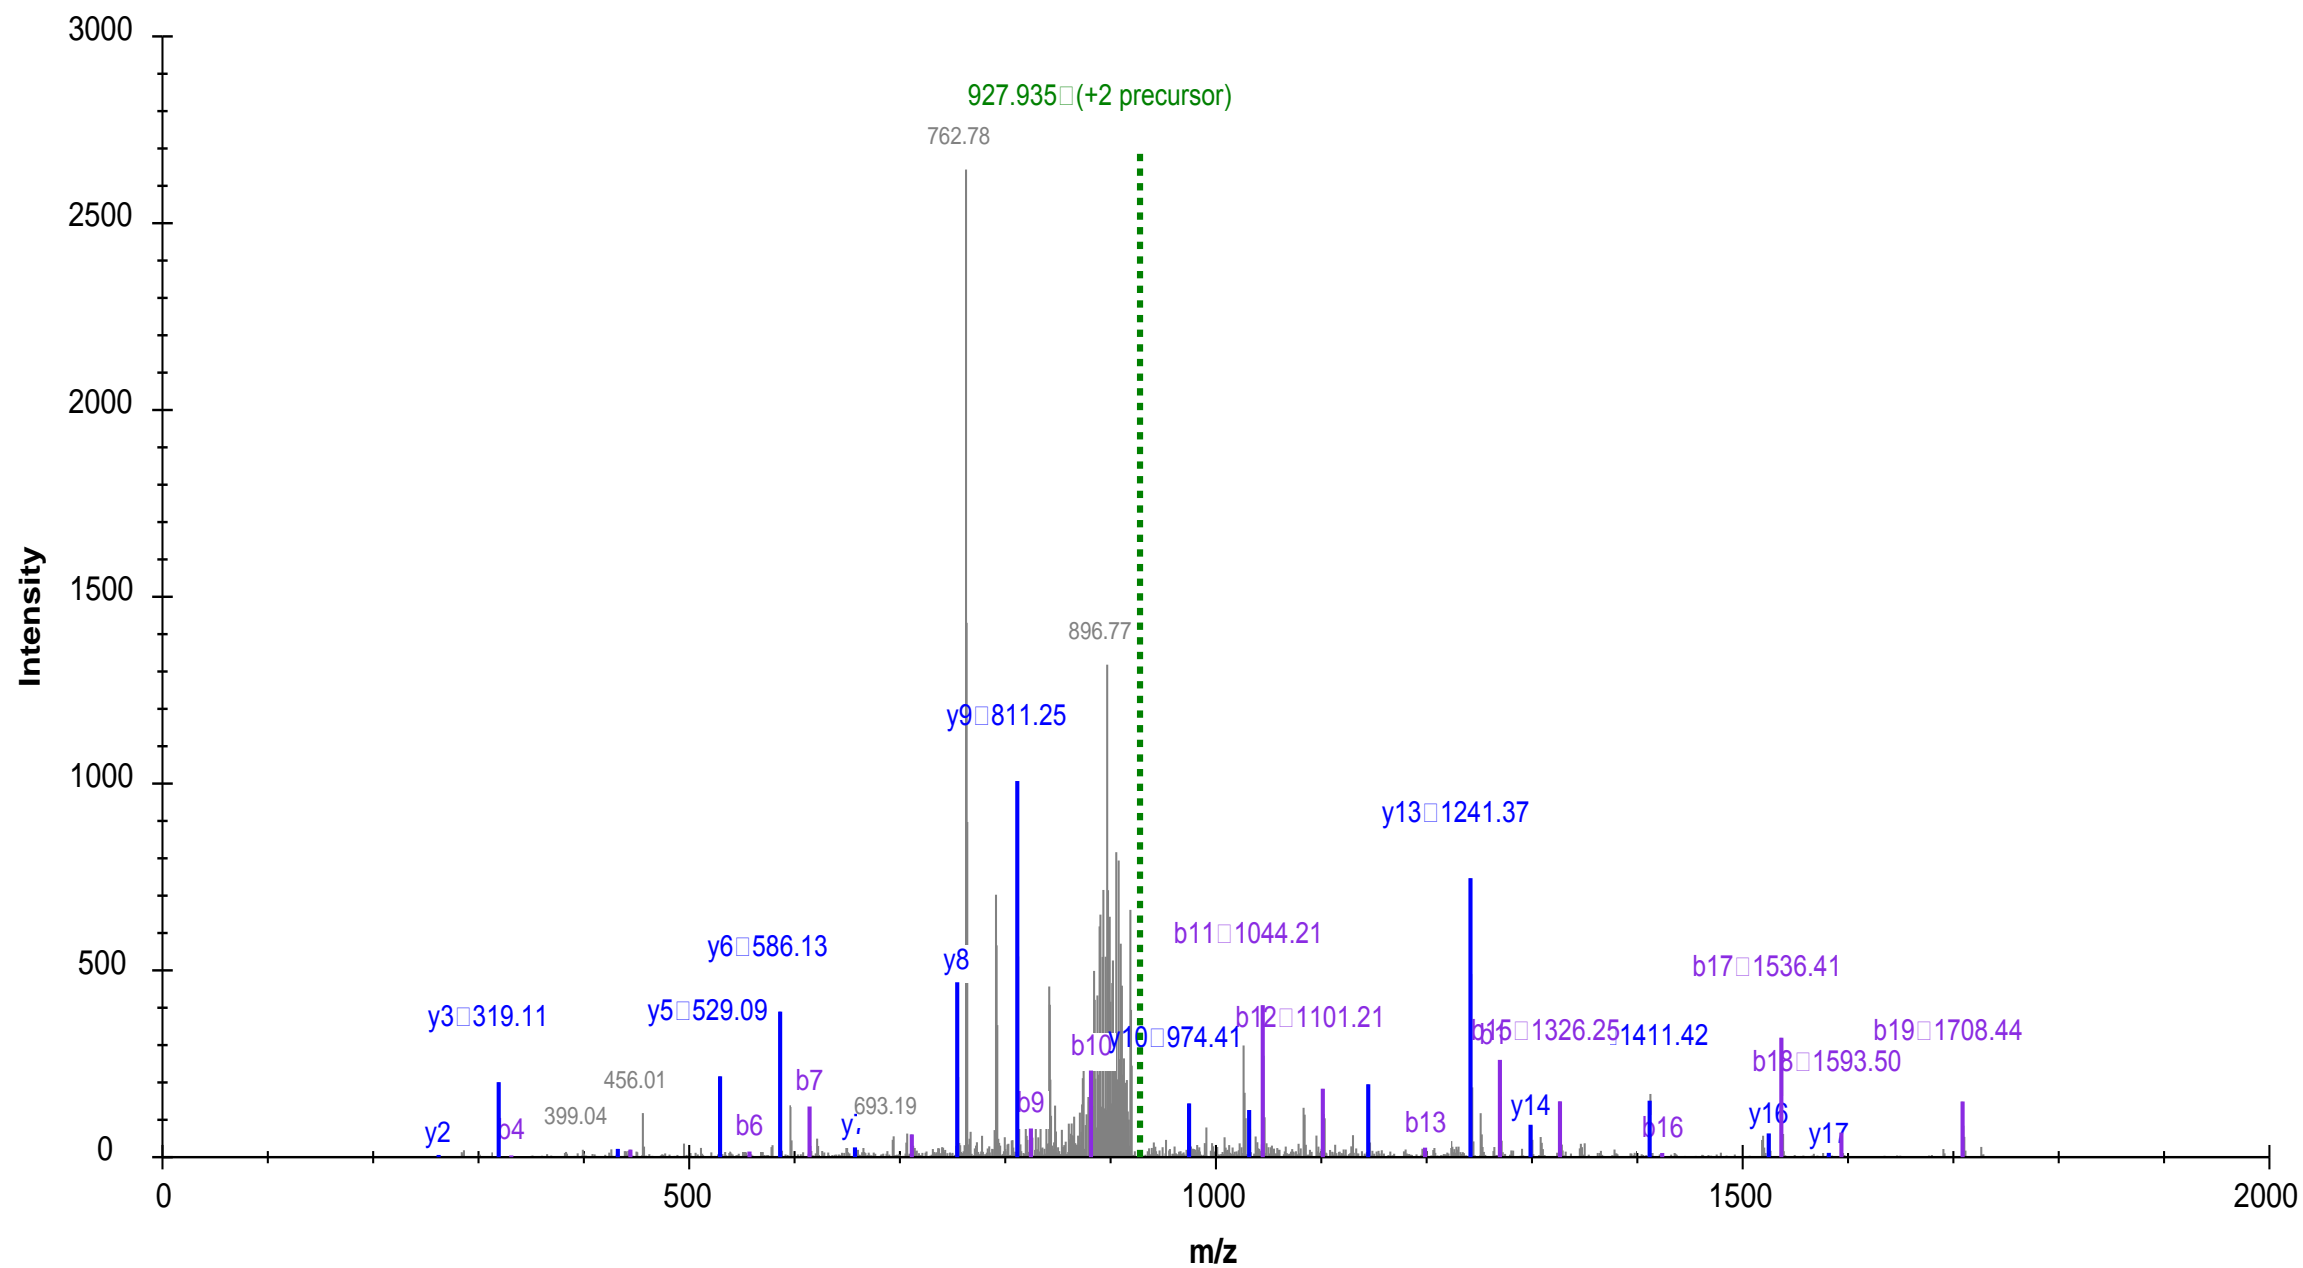

m/z = 618.9572(+3)

PSM showing the identification of 3-Hyp<sup>602</sup>

Human col4a1 chain

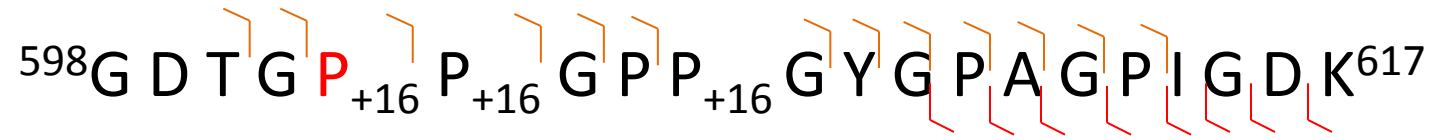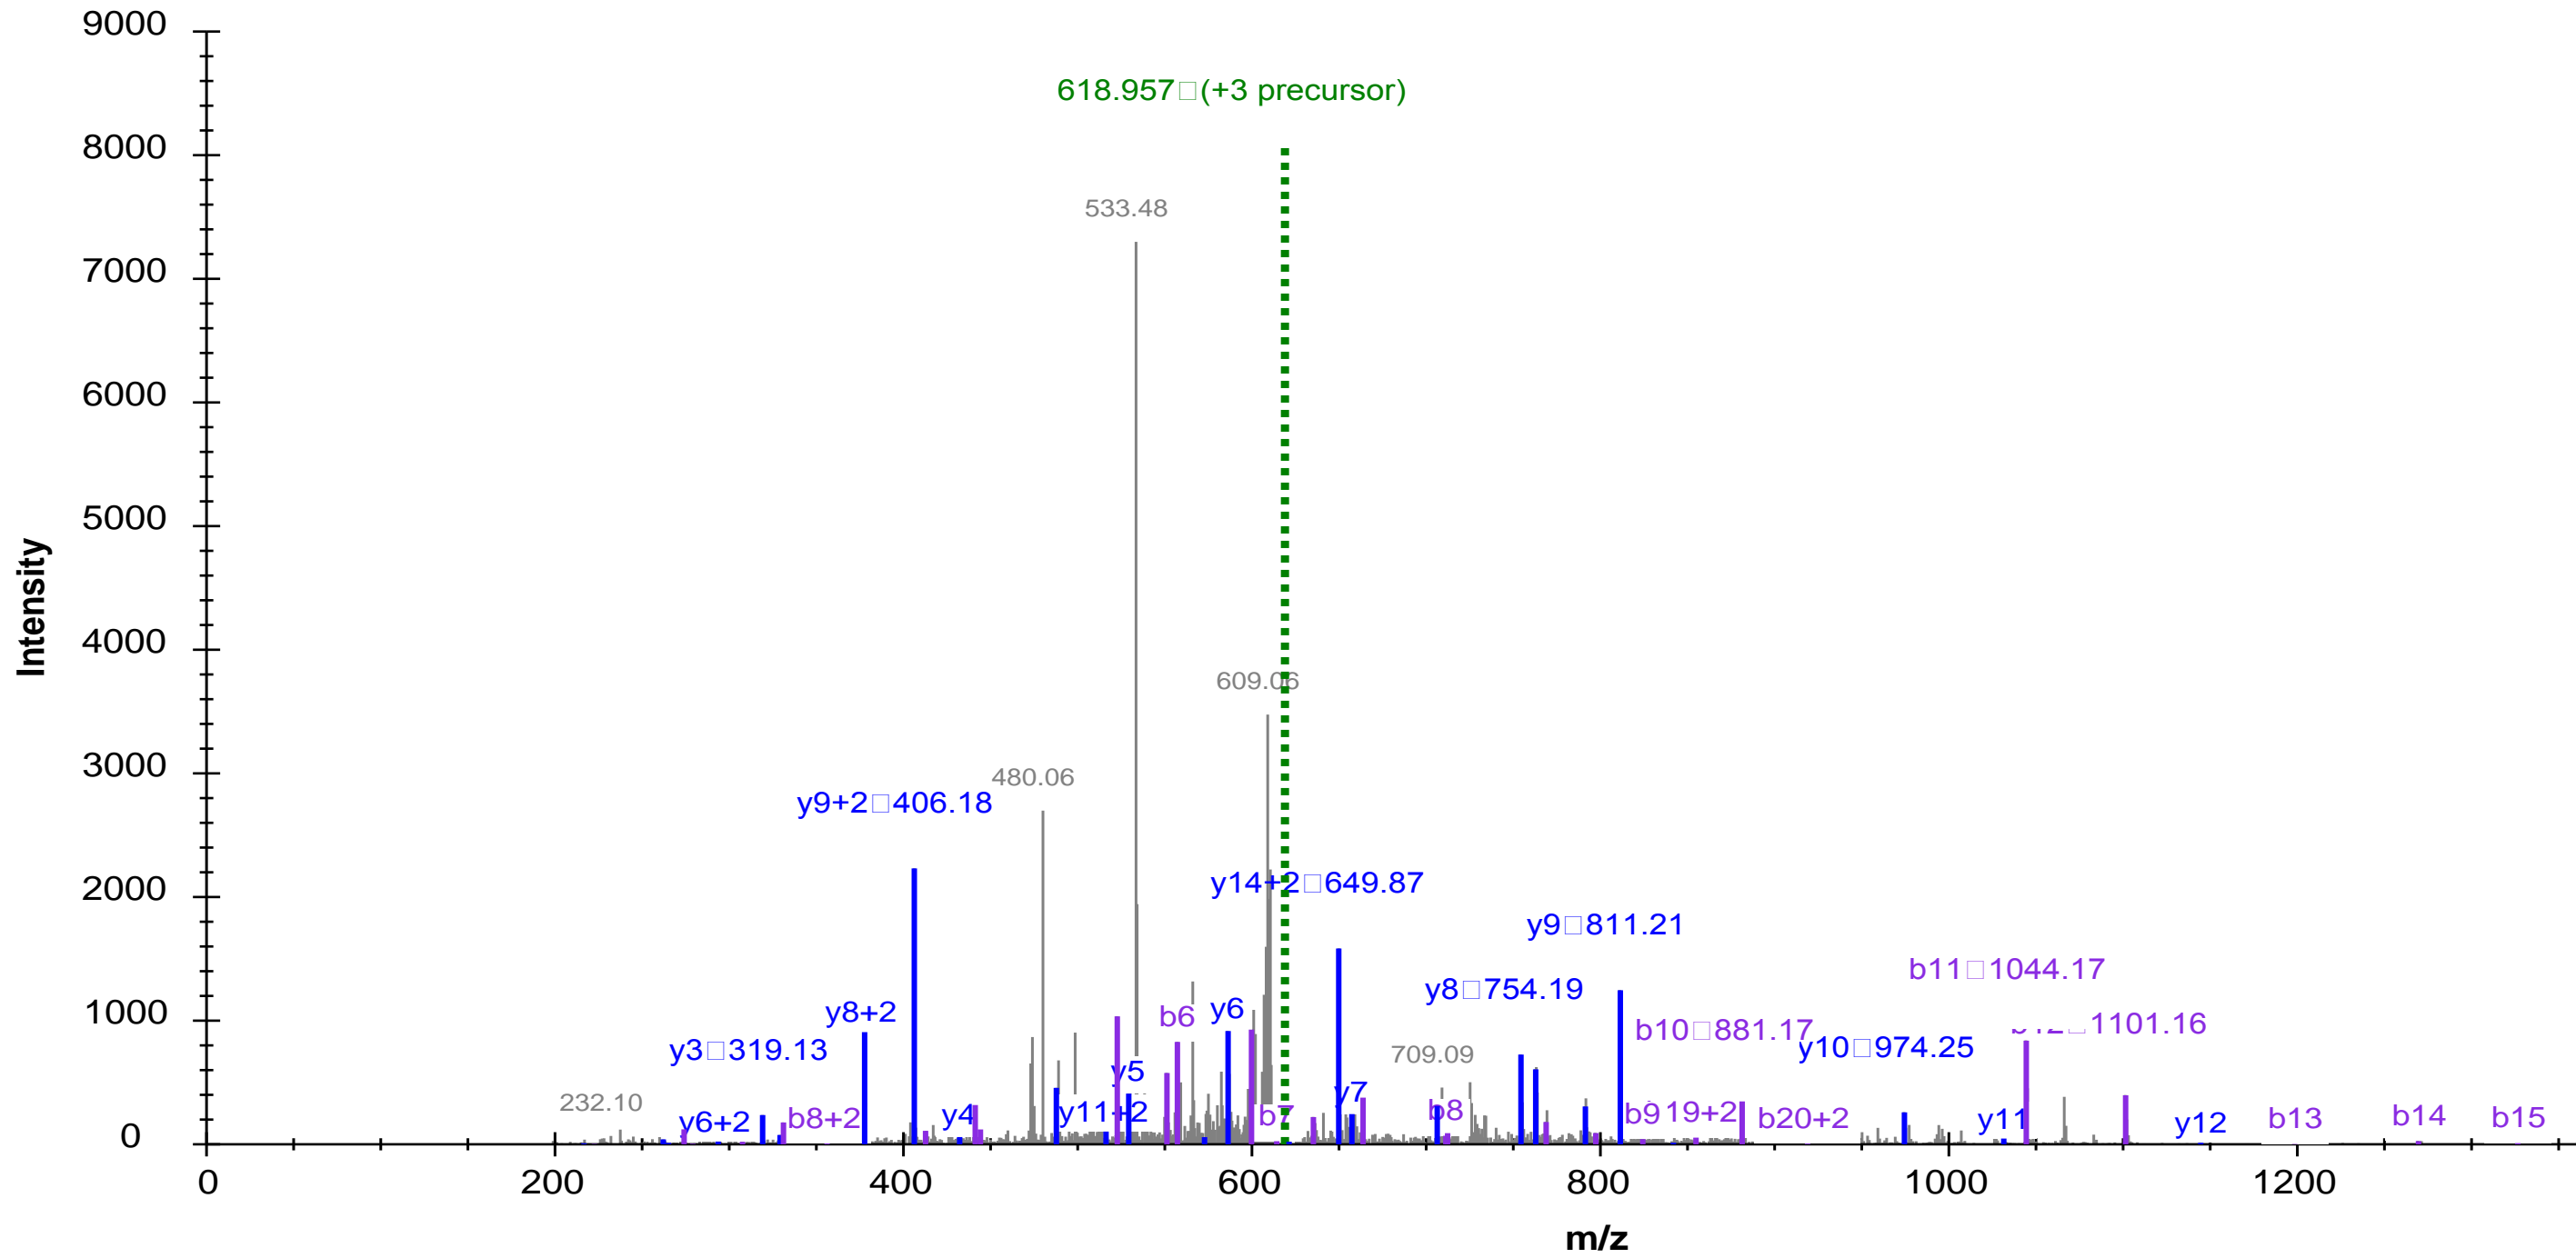

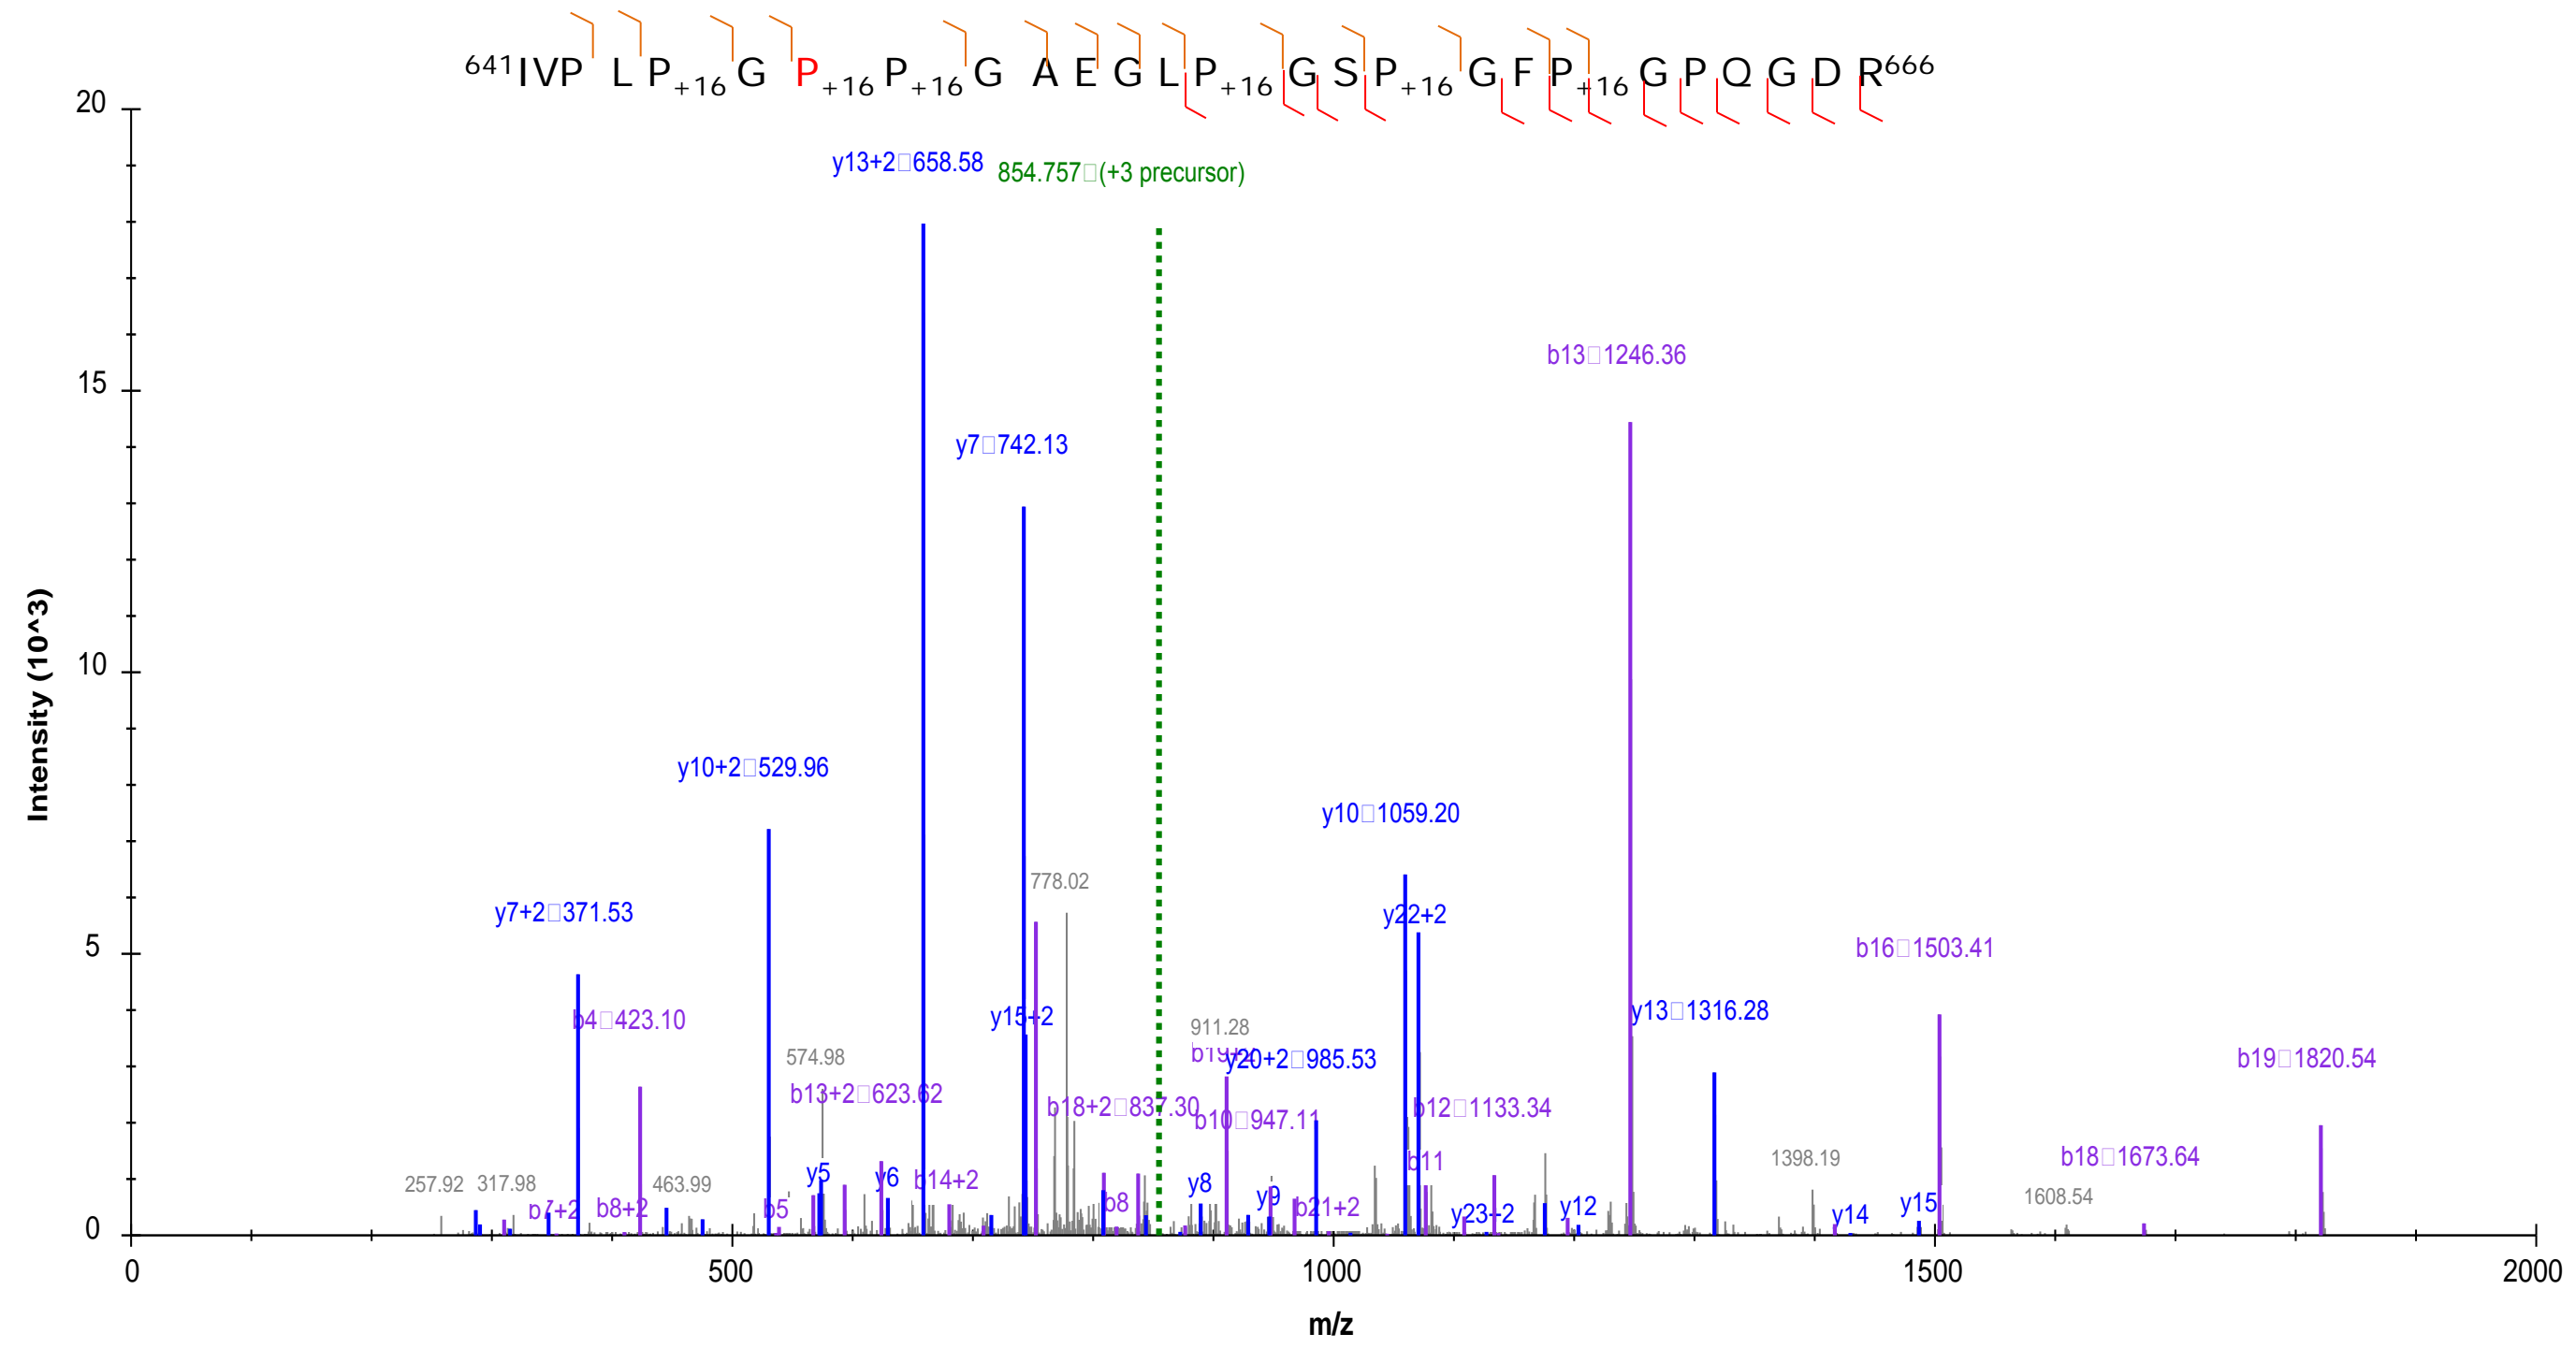

m/z = 849.429 (+3)

PSM showing the identification of Hyp<sup>662</sup>

Human col4a1 chain

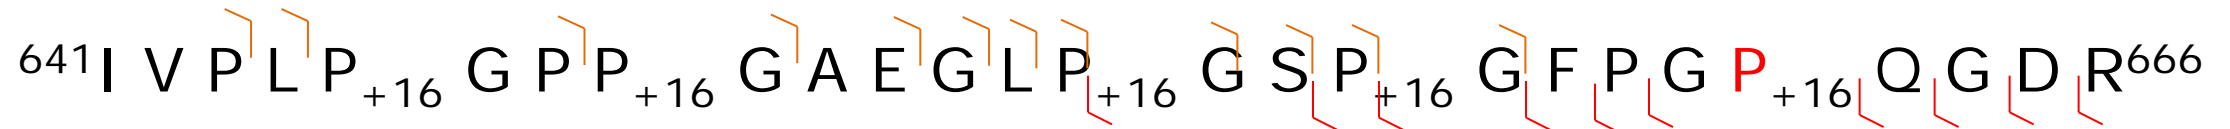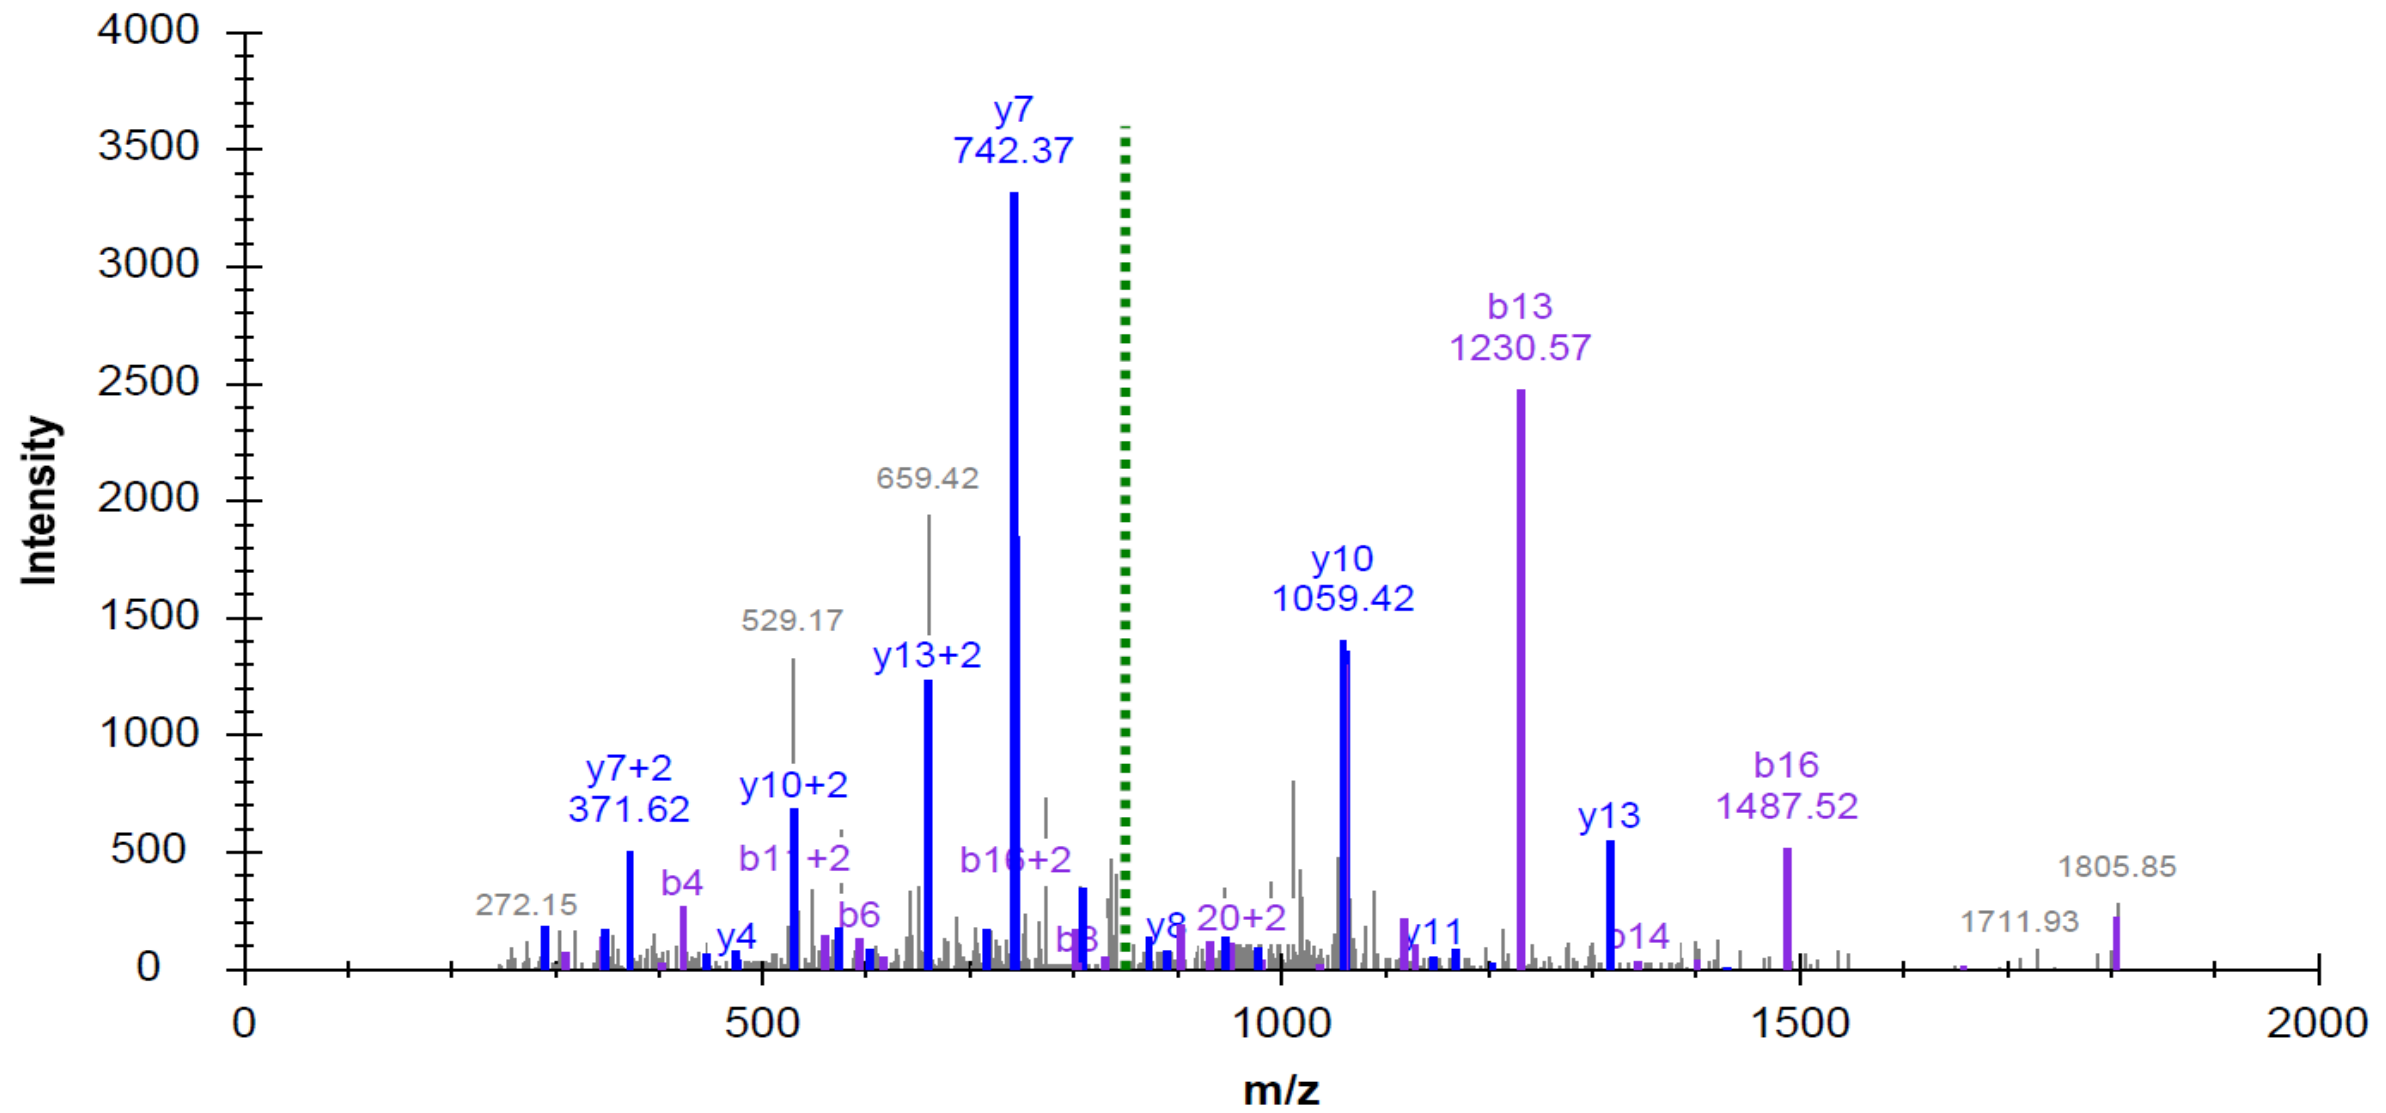

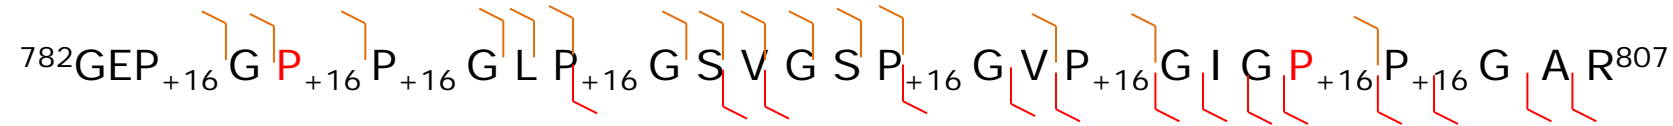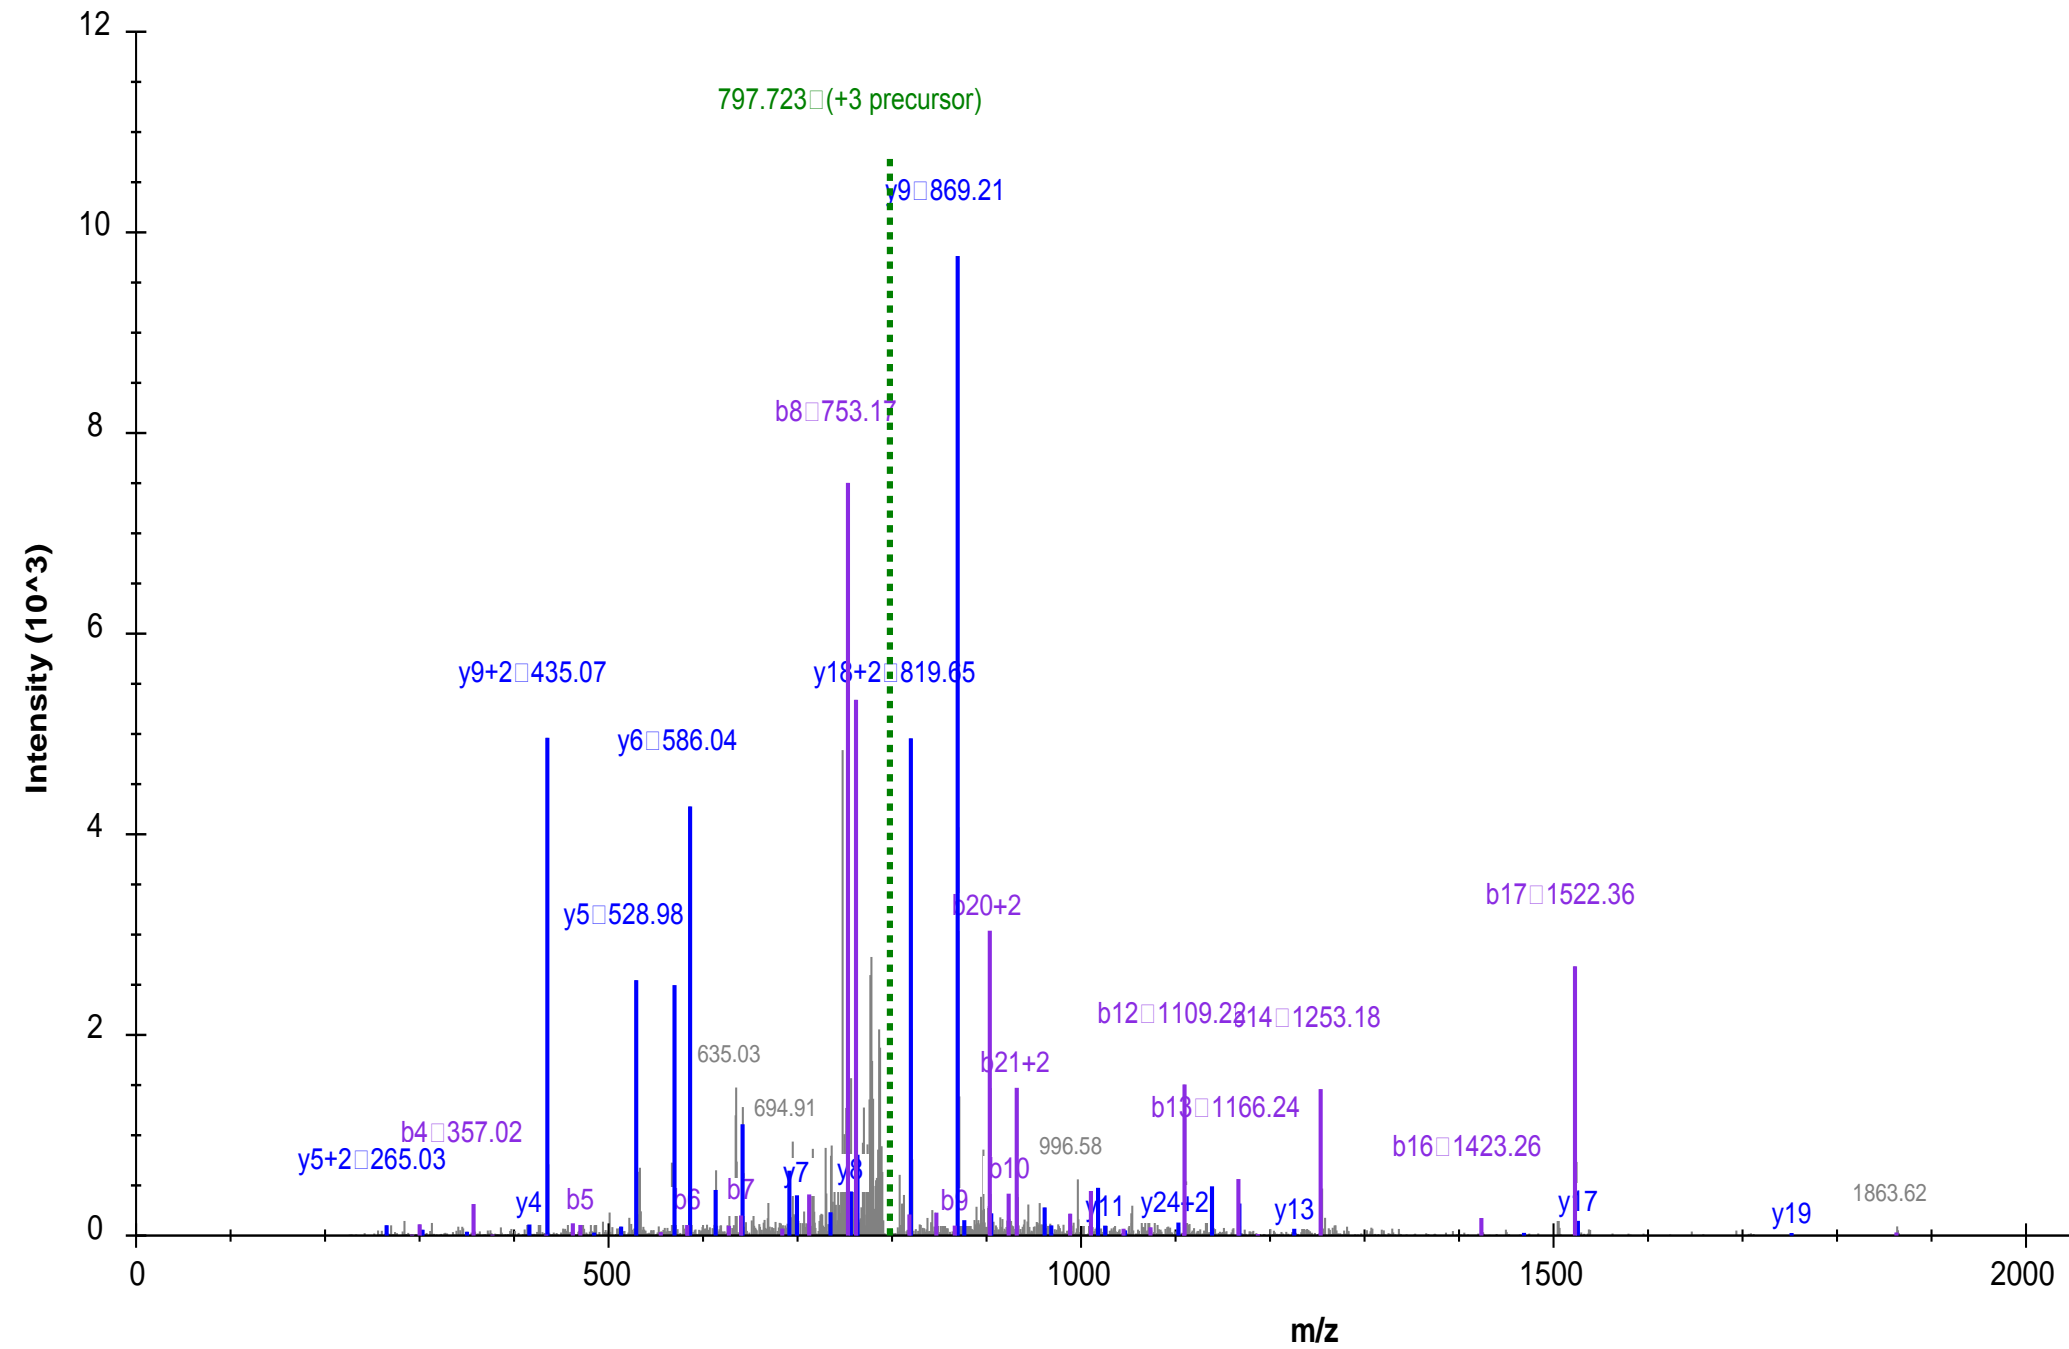

m/z = 782.3984 (+3)

PSM showing the identification of 3-Hyp<sup>1367</sup>

Human col4a1 chain

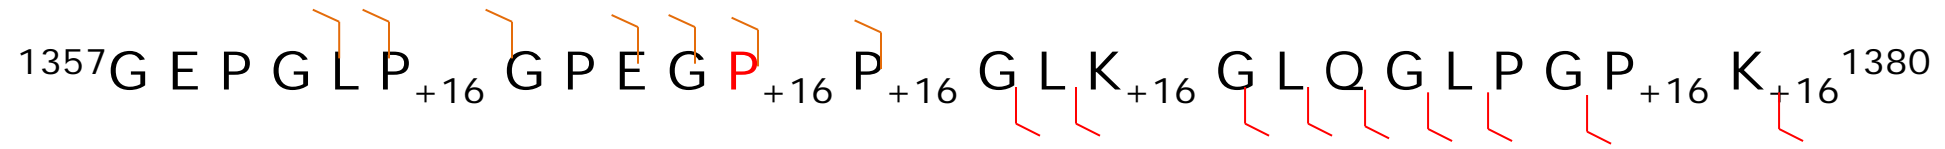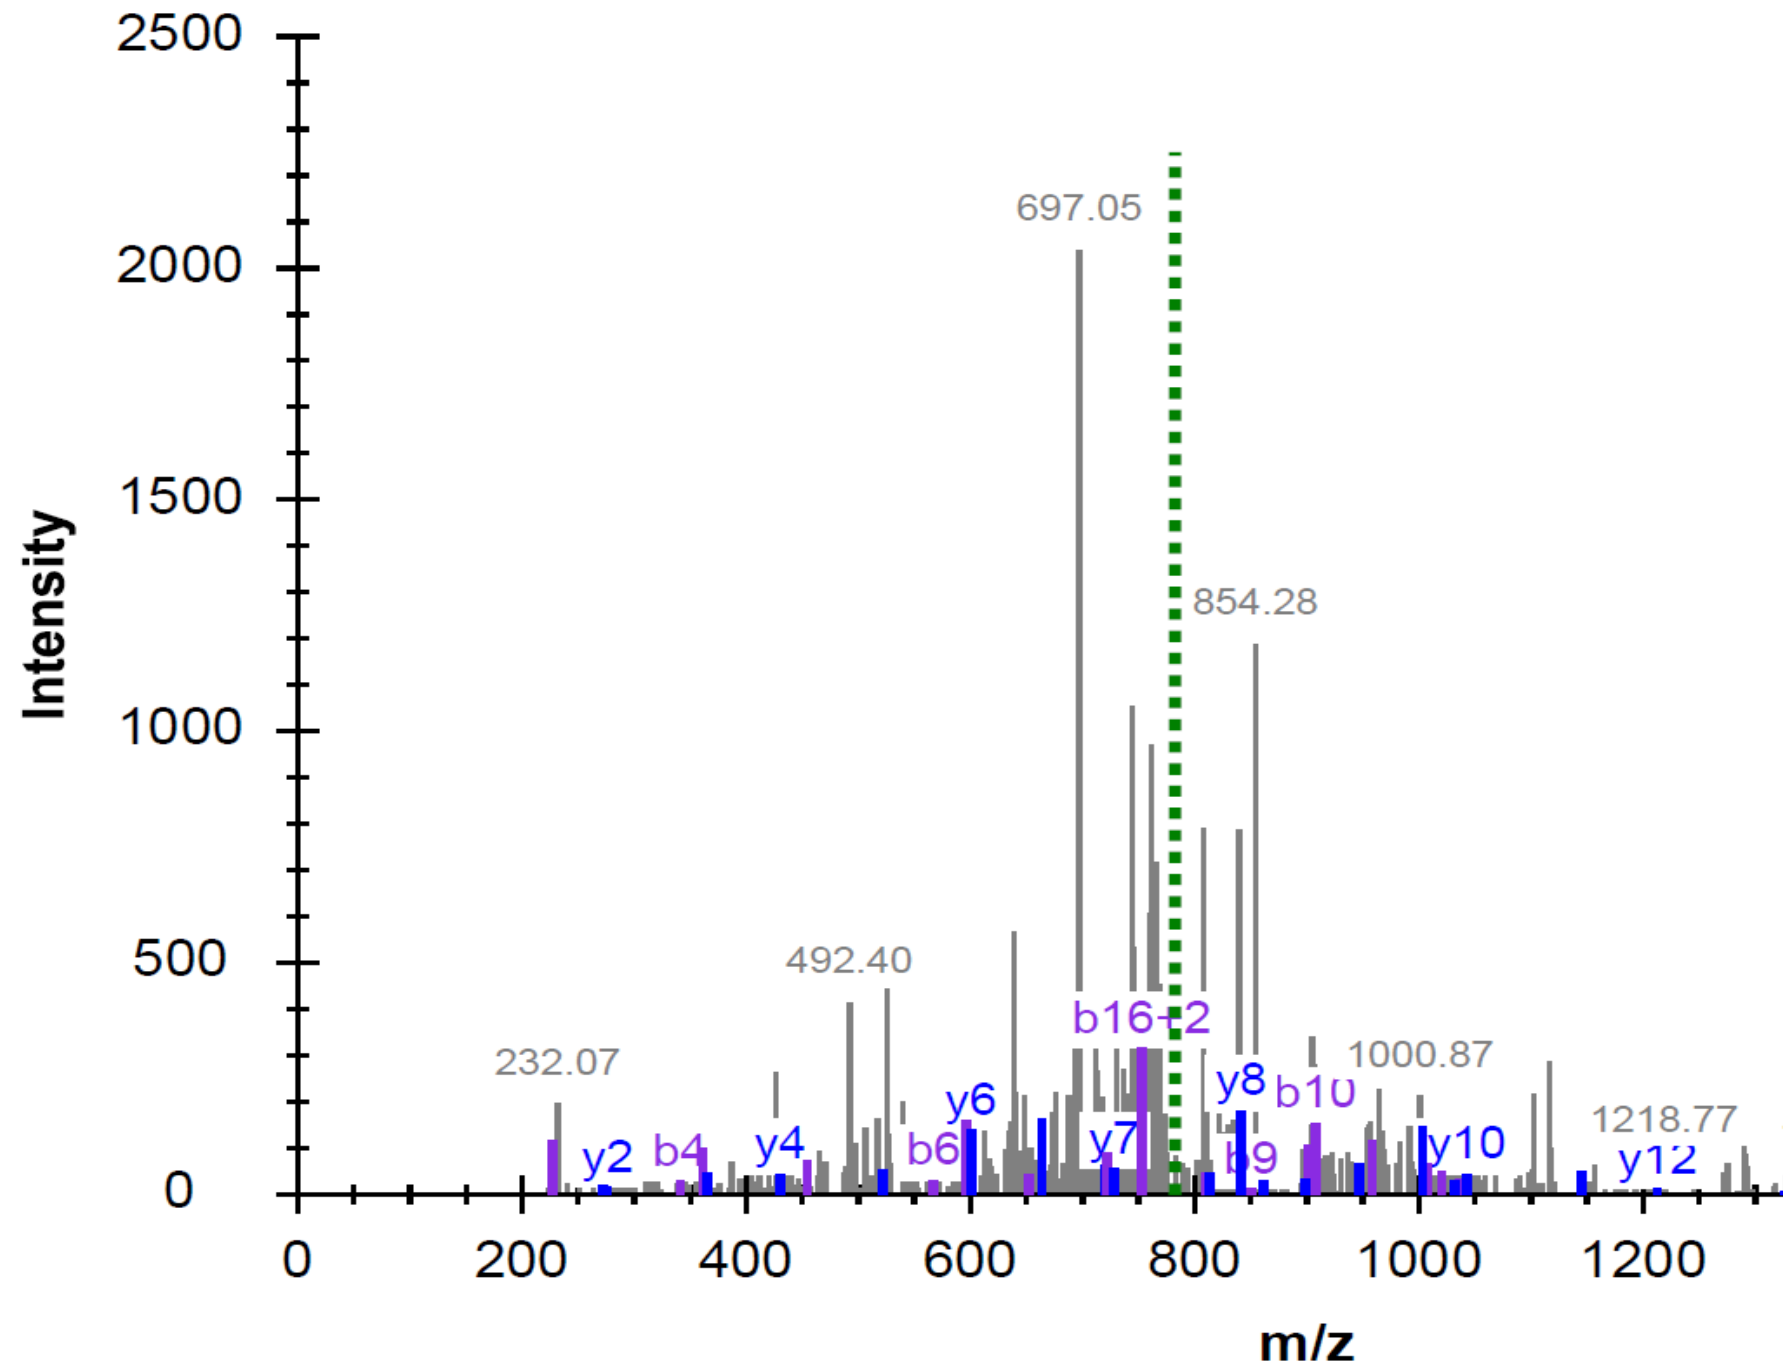



m/z = 782.8649 (+4)

PSM showing the identification of 3-Hyp<sup>1424,1436</sup>

Human col4a1 chain

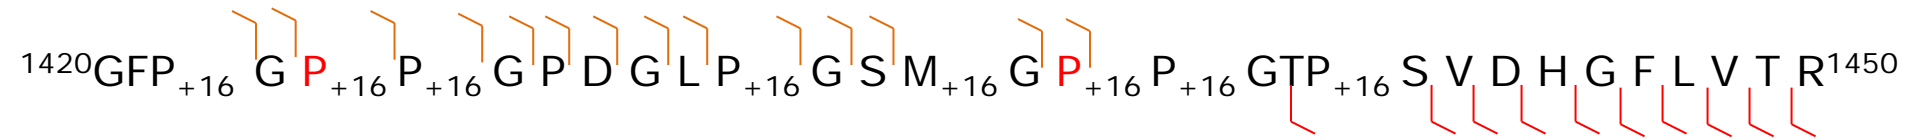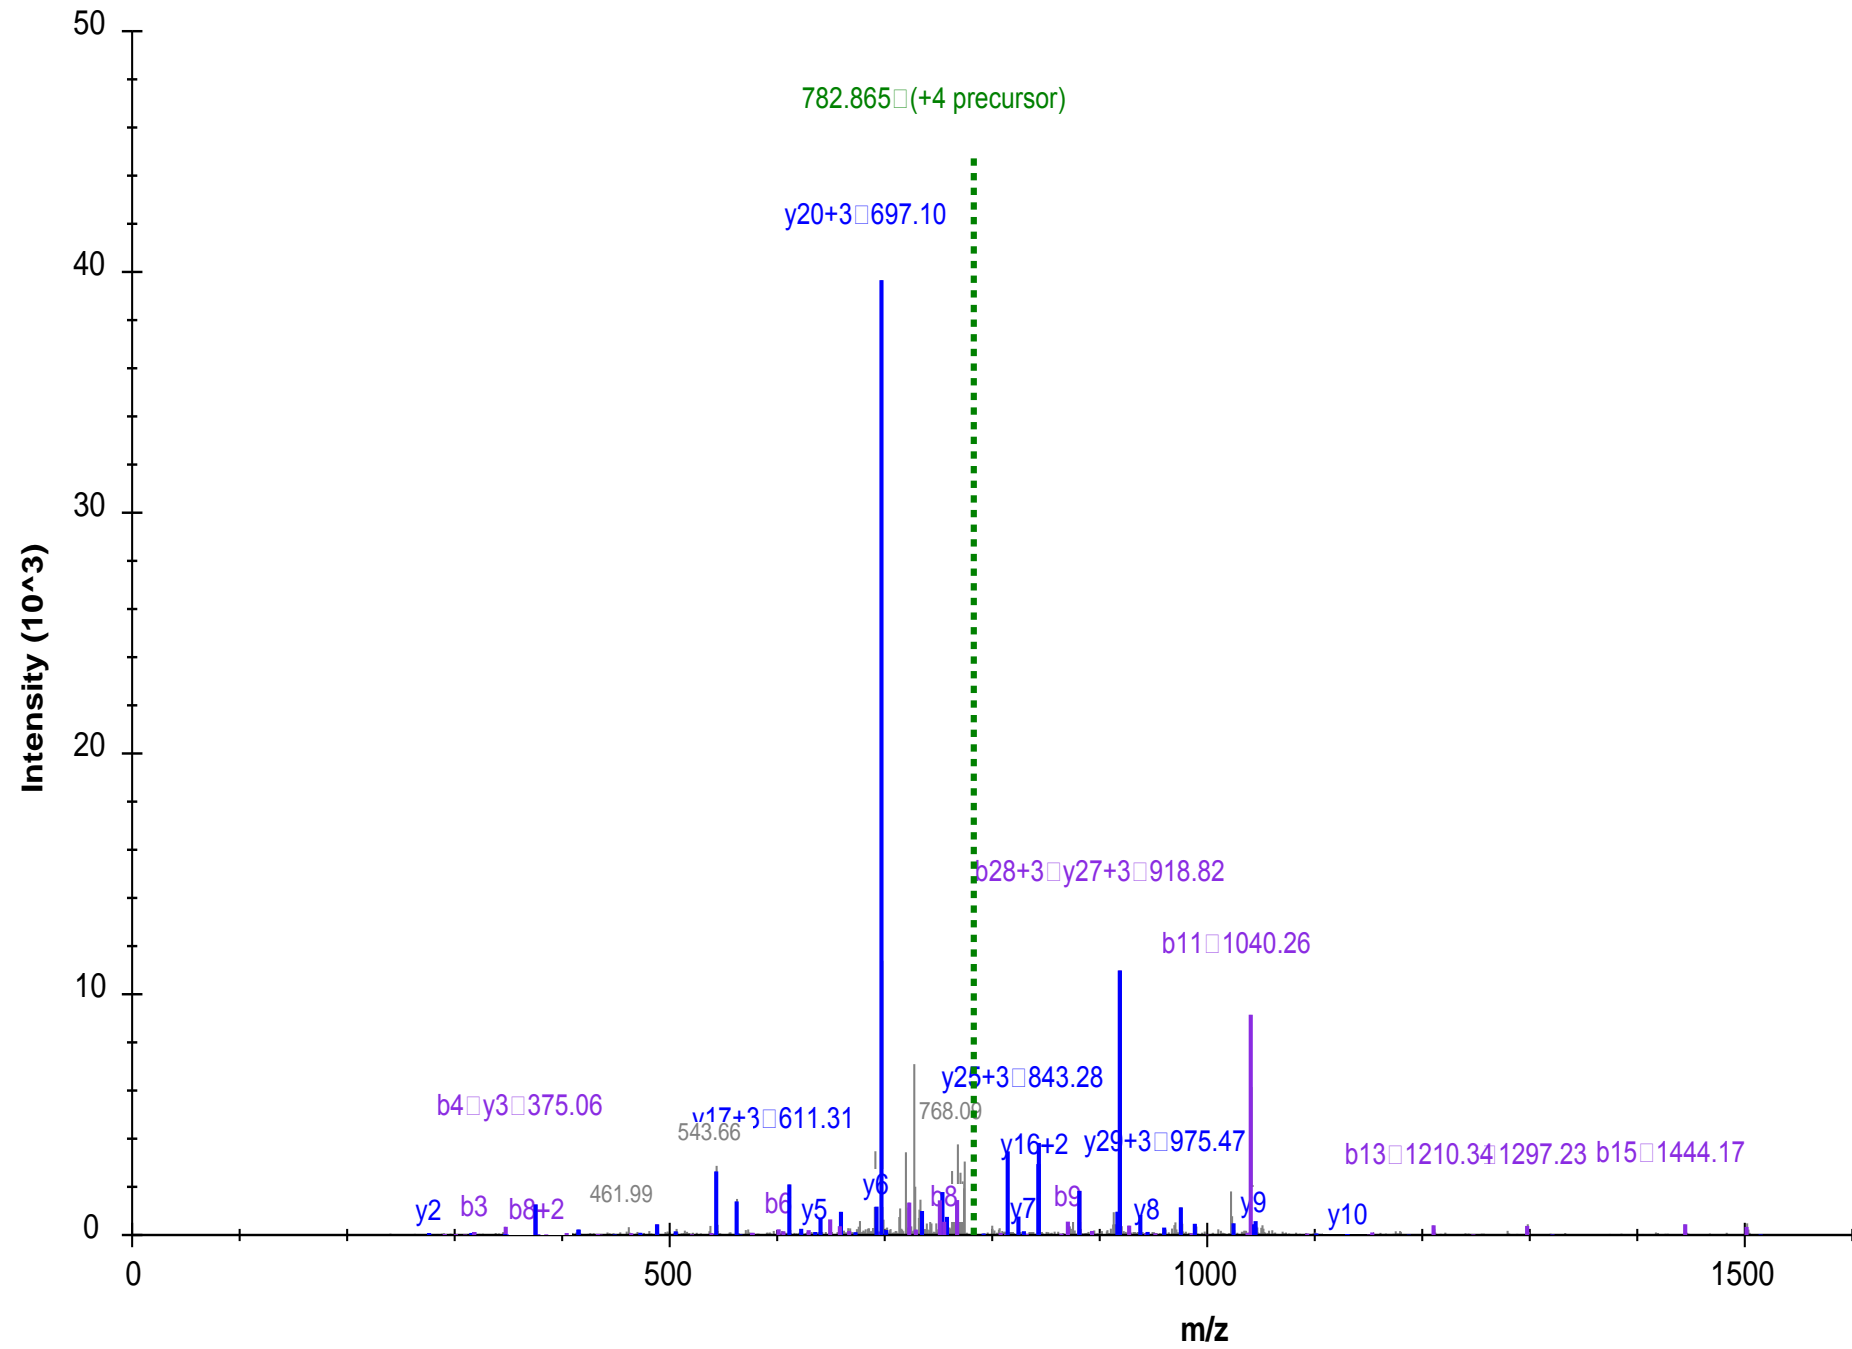

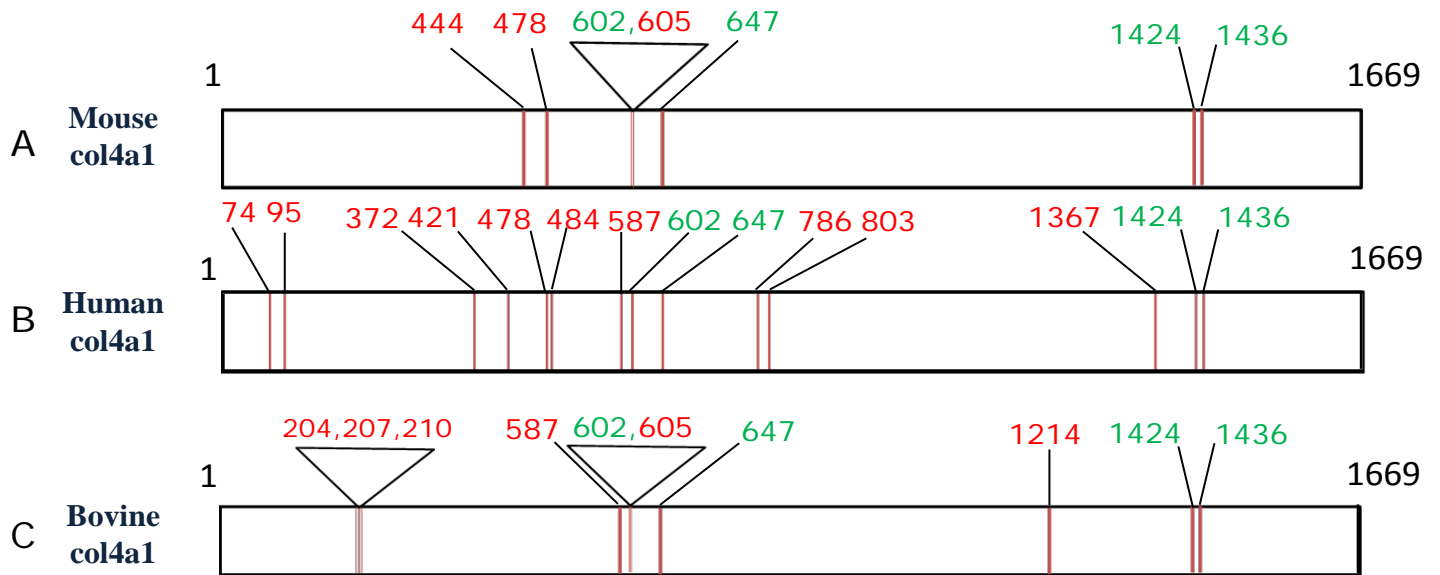

**Supporting figure S4:** Comparison of 3-HyP sites identified in col4a1 from mouse, human and bovine. The horizontal box represents the full length col4a1 sequence and the vertical red lines indicate the corresponding 3-HyP sites. The information for 3 HyP sites from bovine lens capsule (C) were summarized from Pokidysheva et al<sup>3</sup> and Hudson et al<sup>4</sup>. The 3-HyP sites marked with green represents the conserved sites among mouse, human and bovine.

|      |                      |                               |                      |                              |                               |                    |
|------|----------------------|-------------------------------|----------------------|------------------------------|-------------------------------|--------------------|
| 1    | MFSFVDLRLL           | LLLGATALLT                    | HGQEDIPEVS           | CIHNGLRVPN                   | GETWKPEVCL                    | ICICHNGTAV         |
| 61   | CDDVQCNEEL           | DCPNPQRREG                    | ECCAFCPEEY           | VSPNSEDVGV                   | EGPKGDPGPQ                    | GPRGPVGGPPG        |
| 121  | RDGIPGQPGL           | PGPPGPPGPP                    | GPPGLGGNFA           | SQMSYGYDEK                   | SAGVSVPGPM                    | GPSGPRGLPG         |
| 181  | PPGAPGPQGF           | QGPPGEPGEP                    | GGSGPMGPRG           | PPGPPGKNGD                   | DGEAGKPGRP                    | GERGPPGPQG         |
| 241  | ARGLPGTAGL           | PGM <b>K</b> GHRGFS           | GLDGA <b>K</b> GDAG  | PAGPKGEPGS                   | PGENGAPGQM                    | GPRGLPGERG         |
| 301  | RPGPPGTAGA           | RGNDGAVGAA                    | GPPGPTGPTG           | PPGFPGA>VGA                  | <b>K</b> GEAGPQGAR            | GSEGPQGVRG         |
| 361  | EPGPPGPAGA           | AGPAGNPGAD                    | GQPGAKGANG           | APGIAGAPGF                   | PGARGPSGPQ                    | GPSGPPGPKG         |
| 421  | NSGEPGAPGN           | <b>7</b> KGD <b>8</b> TGAKGEP | GATGVQGP             | PAGEEGKRG                    | RGEPGPSGLP                    | GPPGERGGPG         |
| 481  | SRGFPGADGV           | <b>9</b> AGPKGPSGER           | <b>10</b> GAPGPAGPKG | SPGEAGRPGE                   | <b>11</b> AGLPGA <b>K</b> GLT | GSPGSPGPDG         |
| 541  | KTGPPGPAGQ           | DGRPGPAGPP                    | GARGQAGVMG           | FPGPKGTAGE                   | PGKAGERGLP                    | GPPGAVGPAG         |
| 601  | KDGEAGAQA            | PGPAGPAGER                    | GEQGPAGSPG           | FQQLPGPAGP                   | PGEAGKPGEQ                    | GVPDGLGAPG         |
| 661  | PSGARGERGF           | PGERGVQGP                     | GPAGPRGNNG           | <b>12</b> APGNDGAKGD         | TGAPGAPGSQ                    | GAPGLQGM           |
| 721  | ERGAAGLPGP           | <b>13</b> <b>K</b> GDRGDAGPK  | <b>14</b> GADGSPGKDG | ARGLTGPIGP                   | <b>15</b> PGPAGAPGD <b>K</b>  | GEAGPSGPPG         |
| 781  | PTGARGAPGD           | RGEAGPPGPA                    | GFAGPPGADG           | <b>16</b> QPGAKGEPGD         | <b>17</b> TGVKGDAGPP          | GPAGPAGPPG         |
| 841  | PIGNVGAPGP           | <b>18</b> <b>K</b> GPRGAAGPP  | GATGFPGAAG           | <b>P</b> RVG <b>P</b> PGPSGN | AGPPGPPGPV                    | <b>19</b> GKEGGKGP |
| 901  | ETGPAGRPGE           | VGPPGPPGPA                    | <b>20</b> GEKGSFGADG | PAGSPGTPGP                   | QGIAGQRGVV                    | GLPGQRGERG         |
| 961  | FPGLPGPSGE           | PGKQGPSGSS                    | GERGPPGPMG           | PPGLAGPPGE                   | SGREGSPGAE                    | GSPGRDGAPG         |
| 1021 | <b>21</b> AKGDRGETGP | AGPPGAPGAP                    | GAPGPVGPAG           | KNGDRGETGP                   | AGPAGPIGPA                    | GARGPAGPQG         |
| 1081 | <b>22</b> PRGDKGETGE | <b>23</b> QGDRGIKGHR          | GFSGLQGP             | SPGSPGEQGP                   | SGASGPAGPR                    | GPPGSAGSPG         |
| 1141 | KDGLNGLPGP           | IG <b>P</b> PGPRGRT           | GDSGPAG <b>P</b> PG  | <b>P</b> PG <b>P</b> PGPPGP  | PSGGYDFSFL                    | PQPPQEKSD          |
| 1201 | GGRYYRADD            | NVVRDRDLEV                    | DTTLKSLSQ            | IENIRSPEGS                   | RKNPARTCRD                    | LKMCHSDWKS         |
| 1261 | GEYWIDPNQG           | CNLDAIKVYC                    | NMETGQTCVF           | PTQPSVPQKN                   | WYISPNPKEK                    | KHVWFGESMT         |
| 1321 | DGFPEYGE             | GSDPADVAIQ                    | LTFLRLMSTE           | ASQNITYHCK                   | NSVAYMDQQT                    | GNLKKALLLQ         |
| 1381 | GSNEIELRGE           | GNSRFTYSTL                    | VDGCTSHTGT           | WGKTVIEYKT                   | TKTSRLPIID                    | VAPLDIGAPD         |
| 1441 | QEFGLDIGPA           |                               |                      |                              |                               |                    |

**Supporting figure S5:** Summary of prolyl 3-hydroxylation and glycosylation sites in mouse colla1<sup>4-7</sup>. The matured colla1 sequences are shown in black. The 23 potential lysine sites for O-glycosylation are numbered. Bold ‘**K**’ indicates O-glycosylated residue in the Yaa position of Gly-Xaa-Yaa motif. Bold ‘**P**’ indicates 3 hydroxyproline in the Xaa position of Gly-Xaa-HyP.

## References:

1. Sun, R.X.; Dong, M.Q.; Song, C.Q.; Chi, H.; Yang, B.; Xiu, L.Y.; Tao, L.; Jing, Z.Y.; Liu, C.; Wang, L.H.; Fu, Y.; He, S.M. Improved peptide identification for proteomic analysis based on comprehensive characterization of electron transfer dissociation spectra. *J Proteome Res* 2010, 9, 6354–6367.
2. Ma, Z. Q.; Chambers, M. C.; Ham, A.J.; Cheek, K.L.; Whitewell, C.W.; Aerni, H.R.; Schilling, B.; Miller, A.W.; Caprioli, R.M.; Tabb, D. L. ScanRanker: Quality assessment of tandem mass spectra via sequence tagging. *J Proteome Res* 2011, 10, 2896-2904.
3. Pokidysheva, E.; Boudko, S.; Vranka, J.; Zientek, K.; Maddox, K.; Moser, M.; Fassler, R.; Ware, J.; Bachinger, H. P.: Biological role of prolyl 3-hydroxylation in type IV collagen. *Proc Natl Acad Sci U S A* 2014, 111, 161-6.
4. Hudson, D. M.; Joeng, K. S.; Werther, R.; Rajagopal, A.; Weis, M.; Lee, B. H.; Eyre, D. R. Post-translationally abnormal collagens of prolyl 3-hydroxylase-2 null mice offer a pathobiological mechanism for the high myopia linked to human LEPREL1 mutations. *J Biol Chem* 2015, 290, 8613-8622.
5. Pokidysheva, E.; Zientek, K. D.; Ishikawa, Y.; Mizuno, K.; Vranka, J. A.; Montgomery, N. T.; Keene, D. R.; Kawaguchi, T.; Okuyama, K.; Bachinger, H. P. Posttranslational modifications in type I collagen from different tissues extracted from wild type and prolyl 3-hydroxylase 1 null mice. *J Biol Chem* 2013, 288, 24742-24752.
6. Cabral, W. A.; Perdivara, I.; Weis, M.; Terajima, M.; Blissett, A. R.; Chang, W.; Perosky, J. E.; Makareeva, E. N.; Mertz, E. L.; Leikin, S.; Tomer, K. B.; Kozloff, K. M.; Eyre, D. R.; Yamauchi, M.; Marini, J. C.: Abnormal type I collagen post-translational modification and crosslinking in a cyclophilin B KO mouse model of recessive osteogenesis imperfecta. *PLoS genetics* 2014, 10, e1004465.
7. Perdivara, I.; Yamauchi, M.; Tomer, K. B. Molecular Characterization of Collagen Hydroxylysine -Glycosylation by Mass Spectrometry: Current Status. *Aust J Chem* 2013, 66, 760-769.
